# Supplementary material
Source: PubMed Central journal article supplement (PMC4193932)
Supplement: embj0033-0981-sd2.pdf [file embj0033-0981-sd2.pdf]

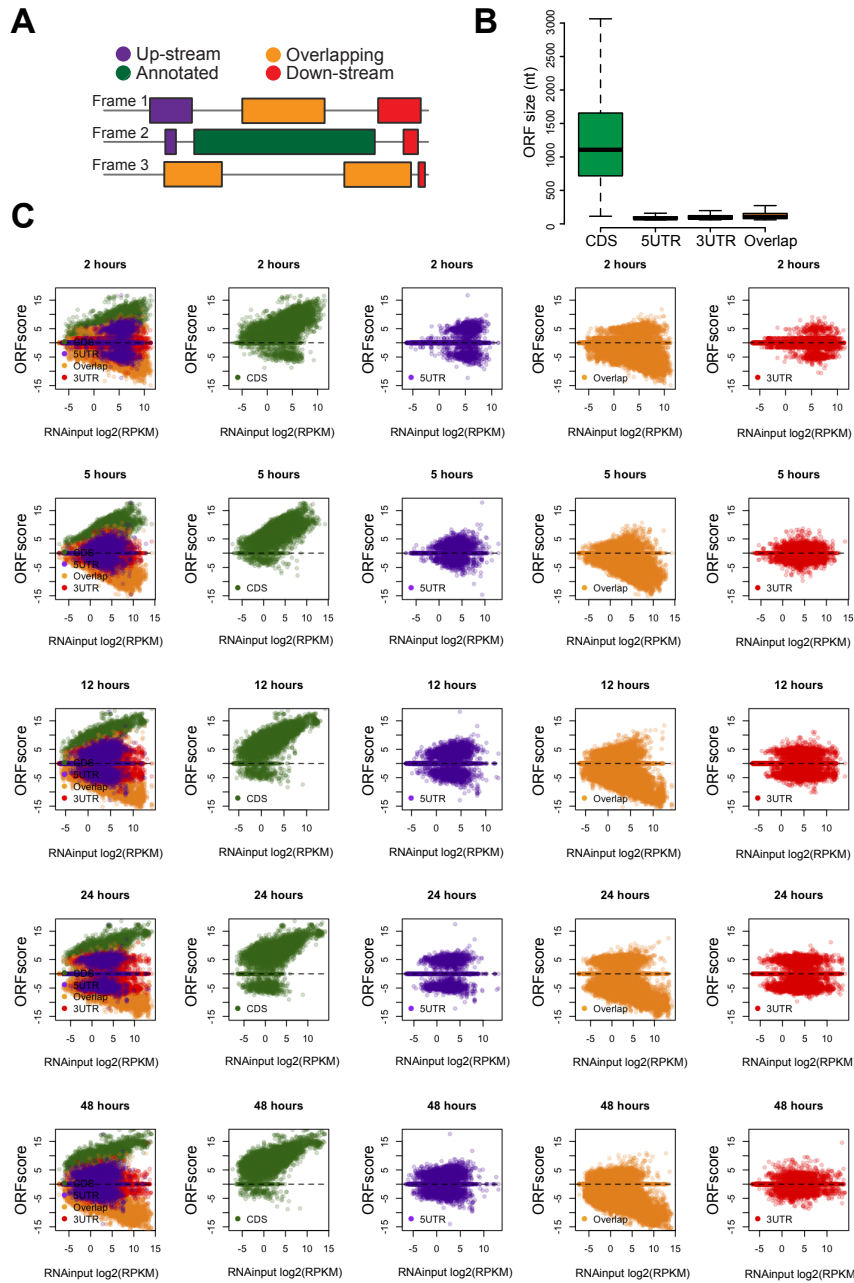

**Figure S2. ORFscore discriminates translated from non-translated ORFs at each time point analyzed.**

In the global analyses, we combined RPFs for all time points for each transcript; ORFscore for each time point clearly discriminates annotated ORFs (green) from non-annotated overlapping ORFs (orange) as well as ORFs in the 5' (purple) and 3' (red) untranslated regions (Supplementary Fig. 2).

- (A) Schematic of RefSeq ORFs: annotated CDS (green), 5'UTR ORFs (purple), 3'UTR ORFs (red), and CDS-overlapping ORFs (orange).
- (B) Boxplot showing the size distribution (in nt) of ORFs in each category.
- (C) Scatterplot of ORFscore compared to RNA expression for all ORFs at each time point.
