# Supplementary material
Source: PubMed Central journal article supplement (PMC4193932)
Supplement: embj0033-0981-sd3.pdf [file embj0033-0981-sd3.pdf]

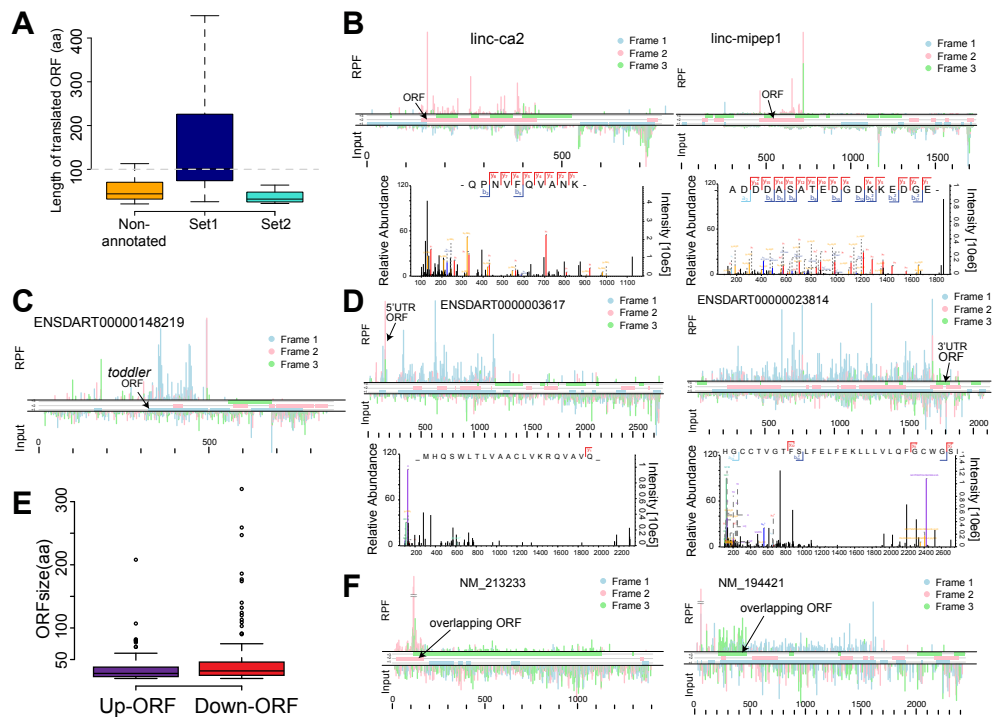

### Figure S3. Identification of smORFs in genes with no defined coding region and in regions annotated as untranslated

(A) Boxplot showing the length distribution of the ORFs defined as coding for linc/ uncharacterized RNAs from Ensembl and two previously-published lincRNA sets (Set1: Ulitsky et al. 2011; Set2: Pauli et al. 2012)

(B) Subcodon profile plots showing examples of translated smORFs in genes with no defined coding region. The lower panels show the annotated MS spectra of unique peptides.

(C) Subcodon profile plot showing an example of a smORF (*toddler/ELABELA*) defined as translated by ORFscore.

(D) Examples of translated altORFs in the 5'UTR and 3'UTR defined by ORFscore and identified by MS.

(E) Length distribution of altORFs classified as coding in the 5'UTR and 3'UTR of annotated protein-coding transcripts.

(F) Examples of overlapping translated regions in annotated coding transcripts detectable by ORFscore
