# Supplementary material
Source: PubMed Central journal article supplement (PMC4193932)
Supplement: embj0033-0981-sd5.pdf [file embj0033-0981-sd5.pdf]

Bazzini et al., Figure S5

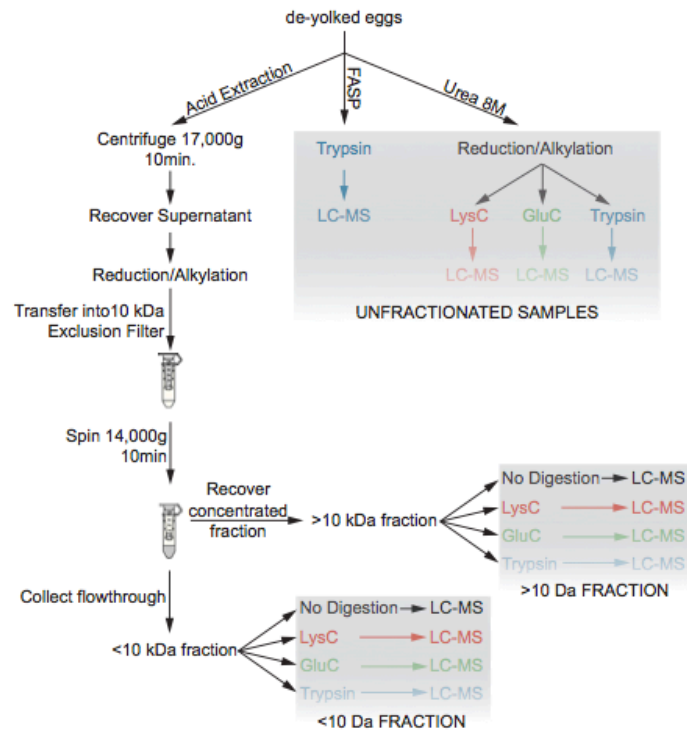

Figure S5. Workflow optimized for smORF detection by mass spectrometry analysis.
