# Supplementary material
Source: PubMed Central journal article supplement (PMC4193932)
Supplement: embj0033-0981-sd10.pdf [file embj0033-0981-sd10.pdf]

ENSDART00000143291, Global

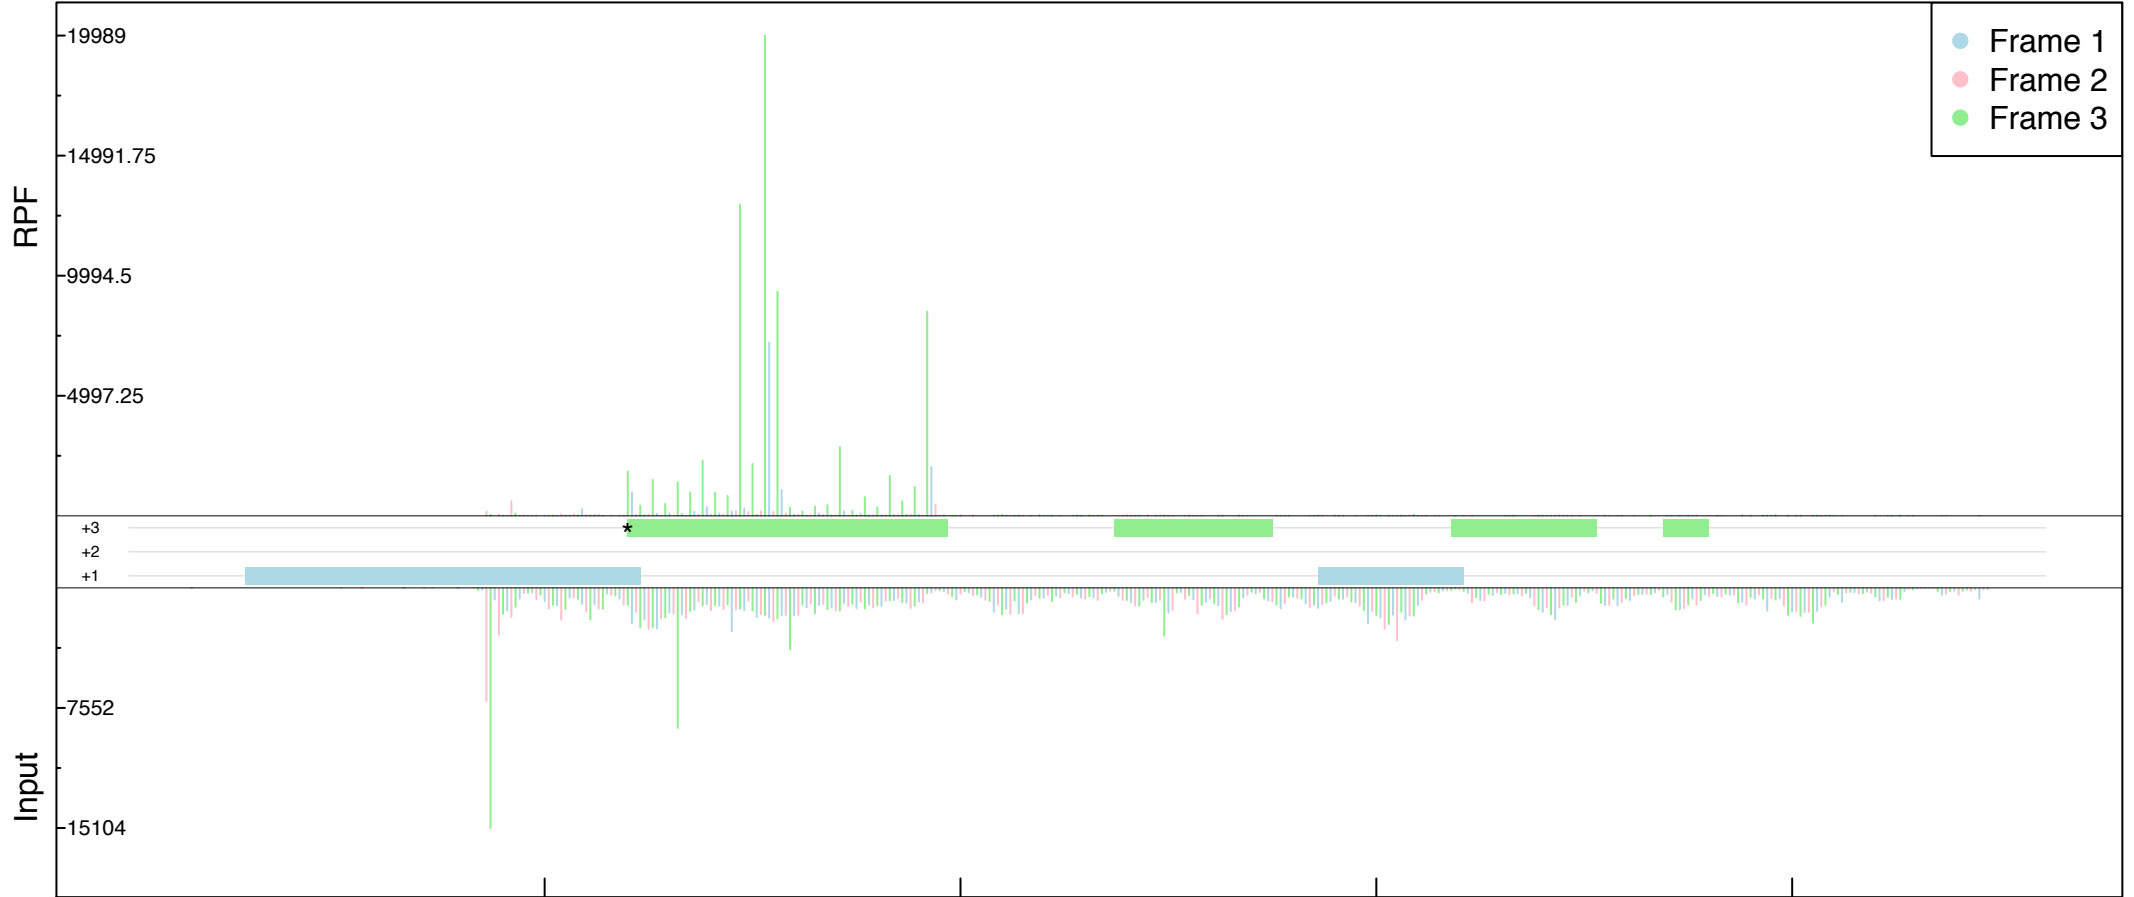

\*MRAKWRKKRMRLKRRKMRQRSK

# ENSDART00000145781, Global

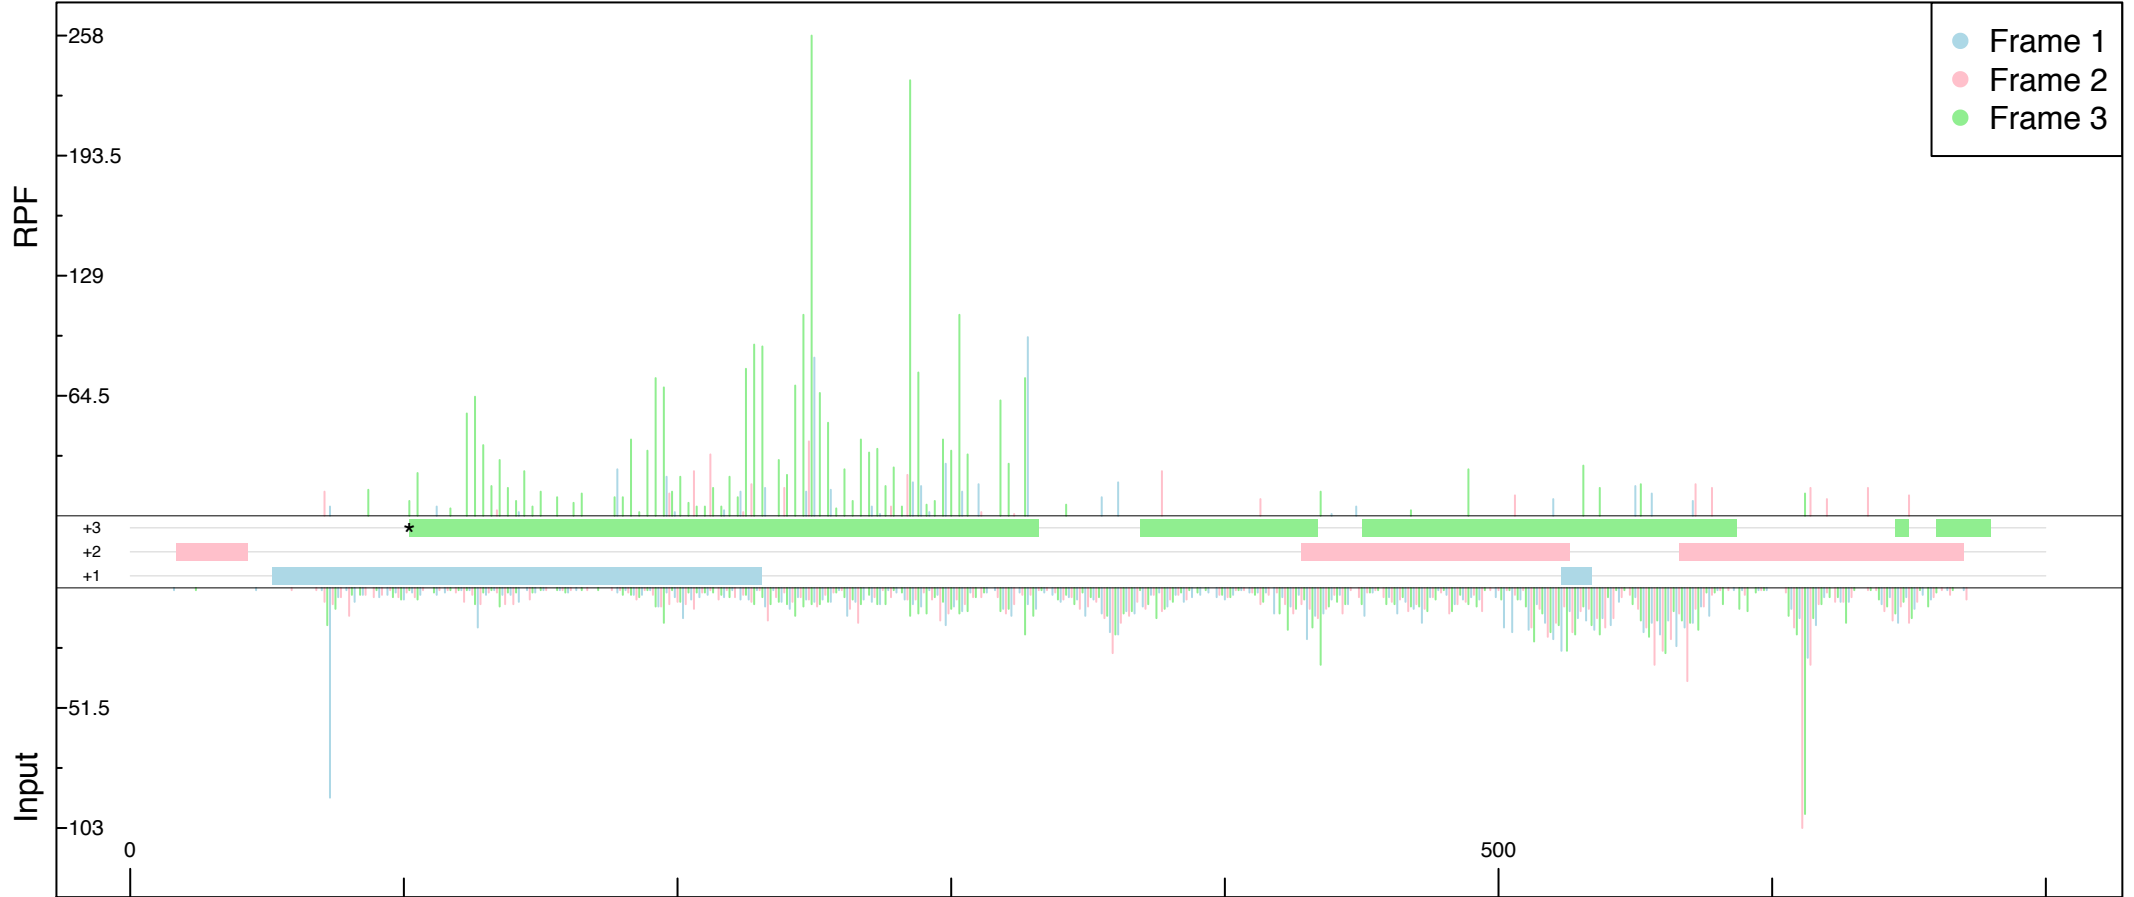

\*MAAEMERFTSFEEAHYDQYDYNNLEDYSSHAGGKGRSKKEICLNTNRHSPAGHERKIAGKLNSELKRRRTKSCSS

ENSDART00000134054, Global

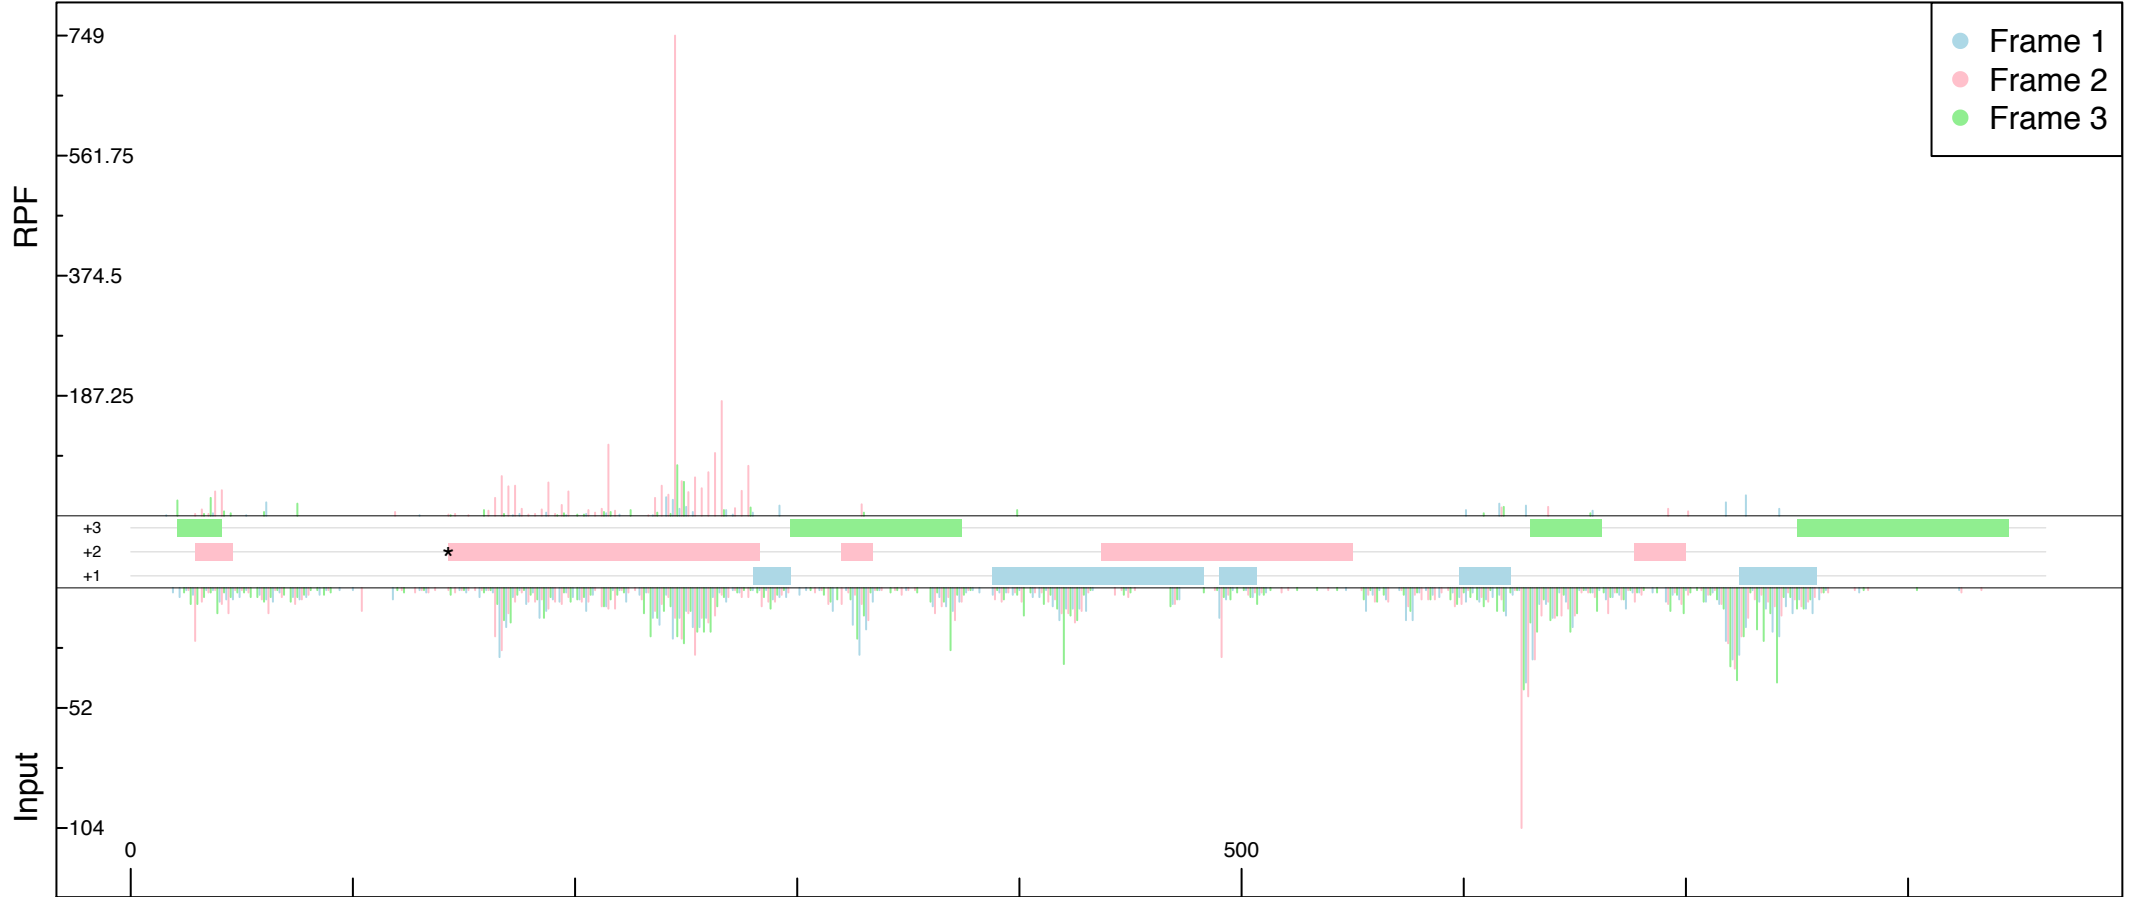

\*MMQFILGFTLGNVVGMYLAQNYEVPNISKKIEAFKDKDVEAKKPPPE

ENSDART00000133192, Global

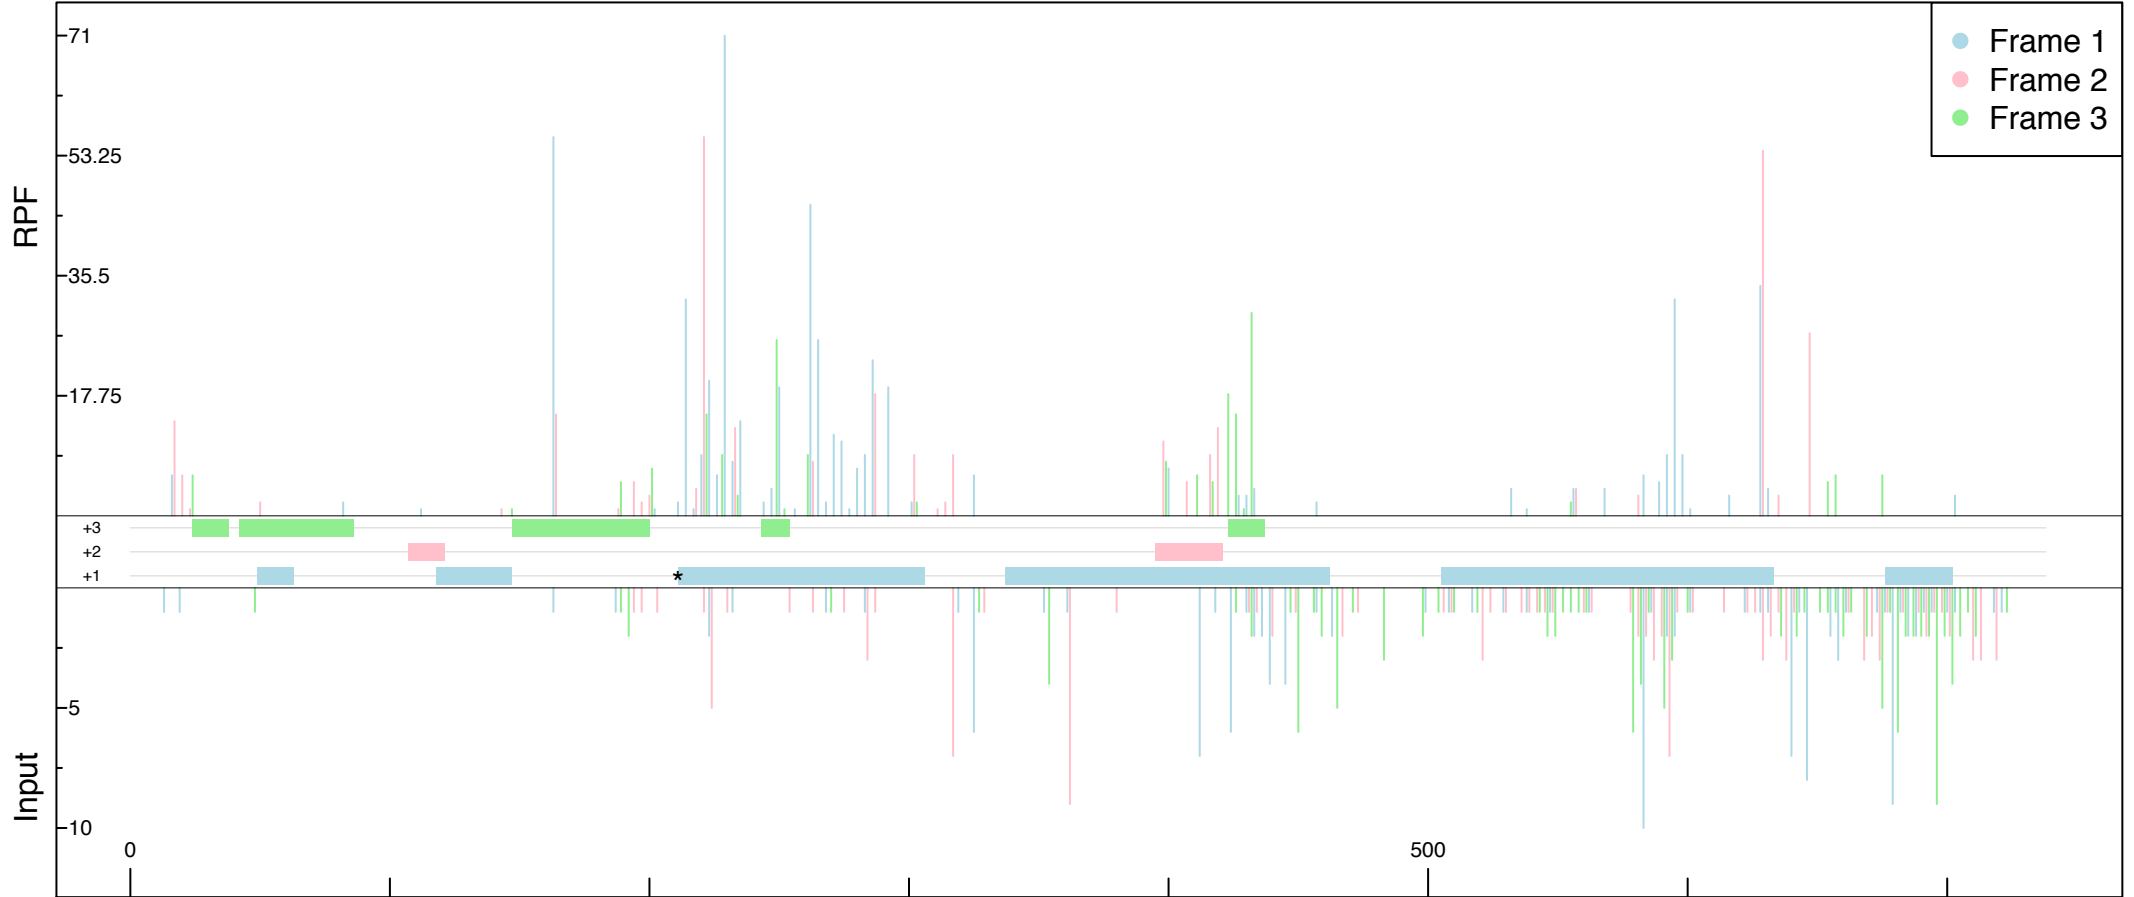

\*MDNCVKIKLKECNLEELIPTFEAQERTFPRF

Zv9\_00054343, Global

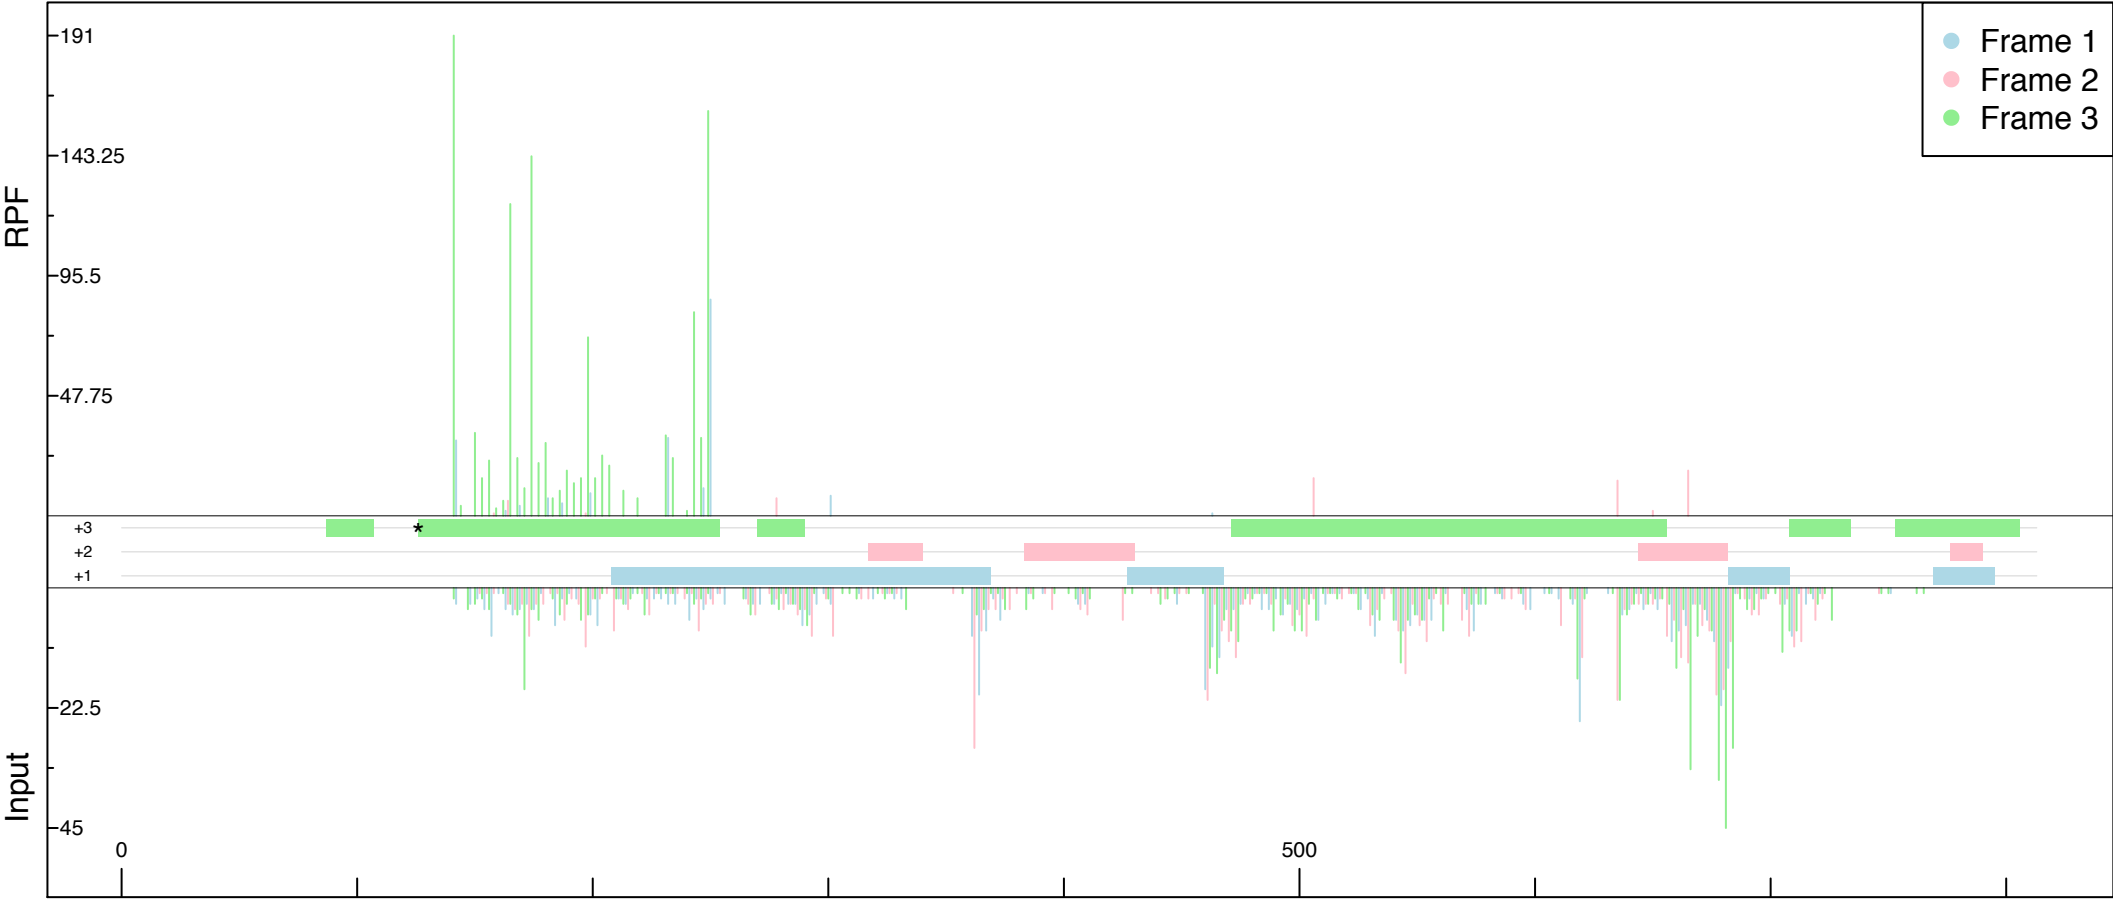

\*MGSTLNKTTKRSTAETTPALMDREPLMNEEEHEENNPSINRT

# linc-brsk1\_\_(2\_of\_2), Global

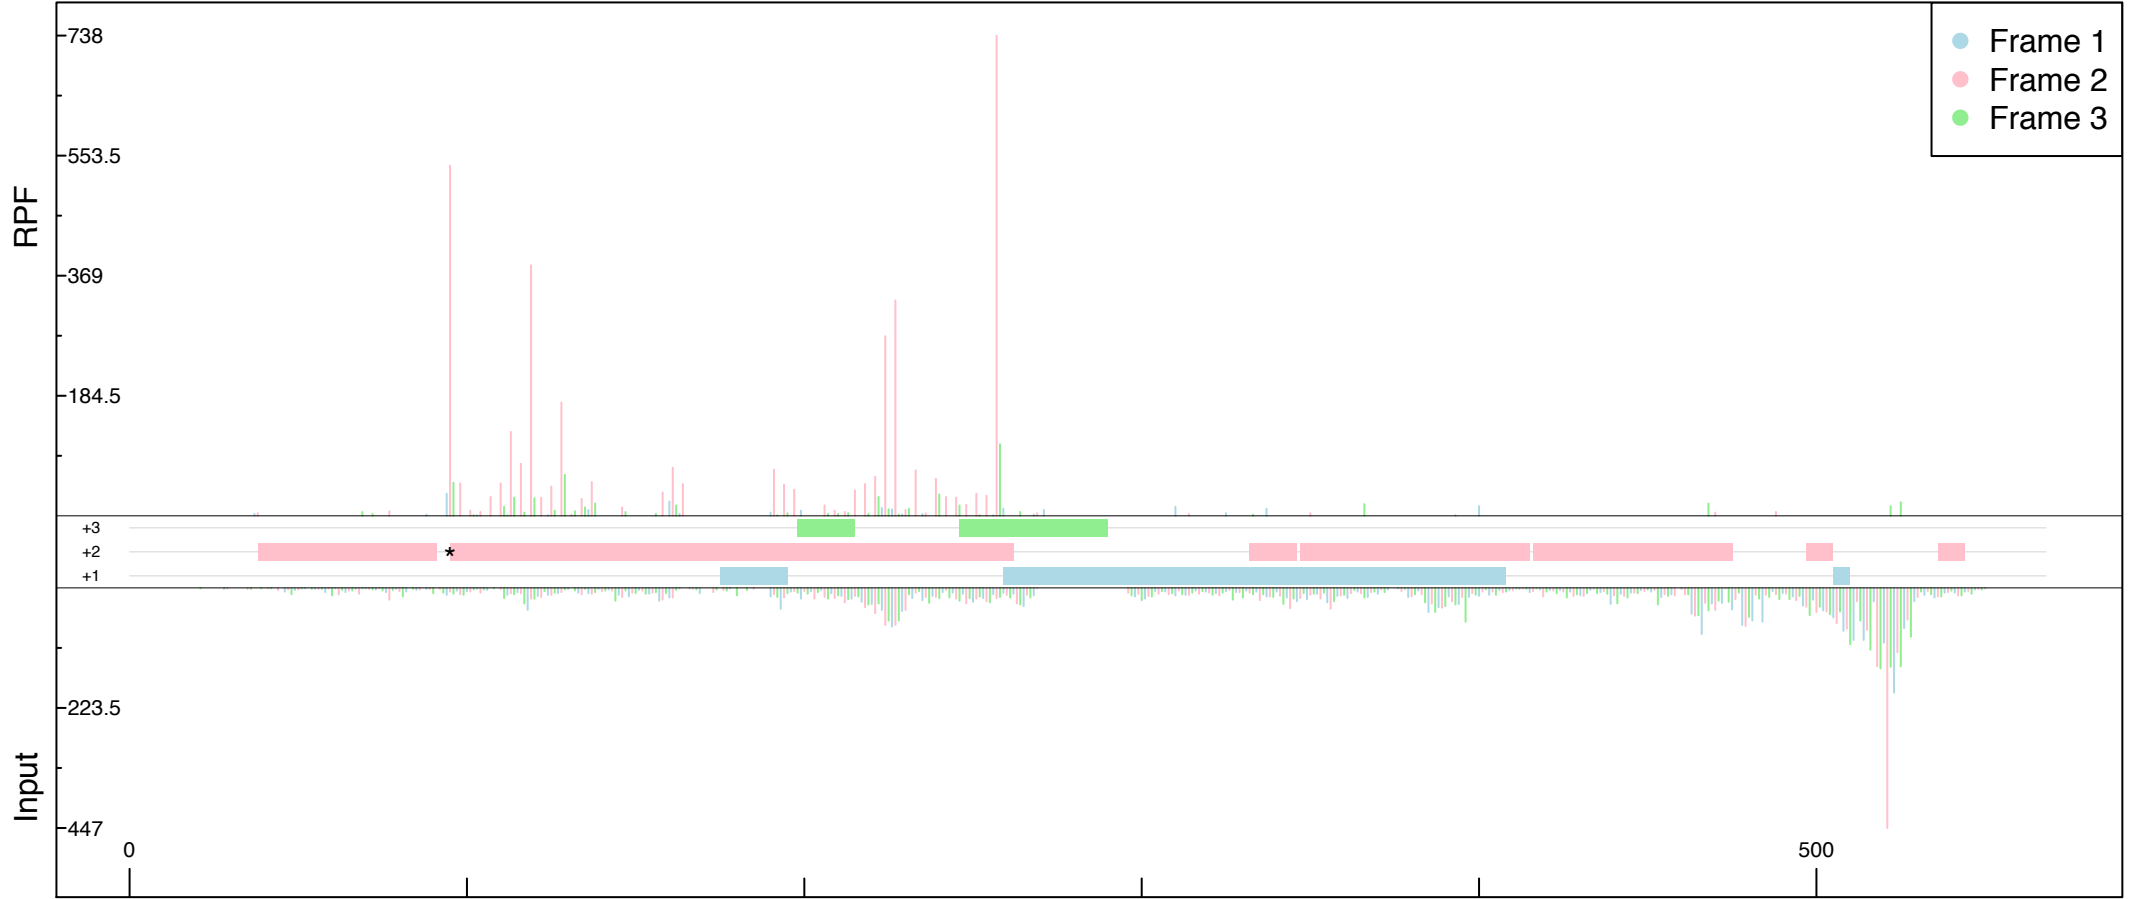

\*MSDSETAAPAETPVPAACVAIKADLDKCVKEKGEDGCKDLMEAFACVKSNAEAS

ENSDART00000140693, Global

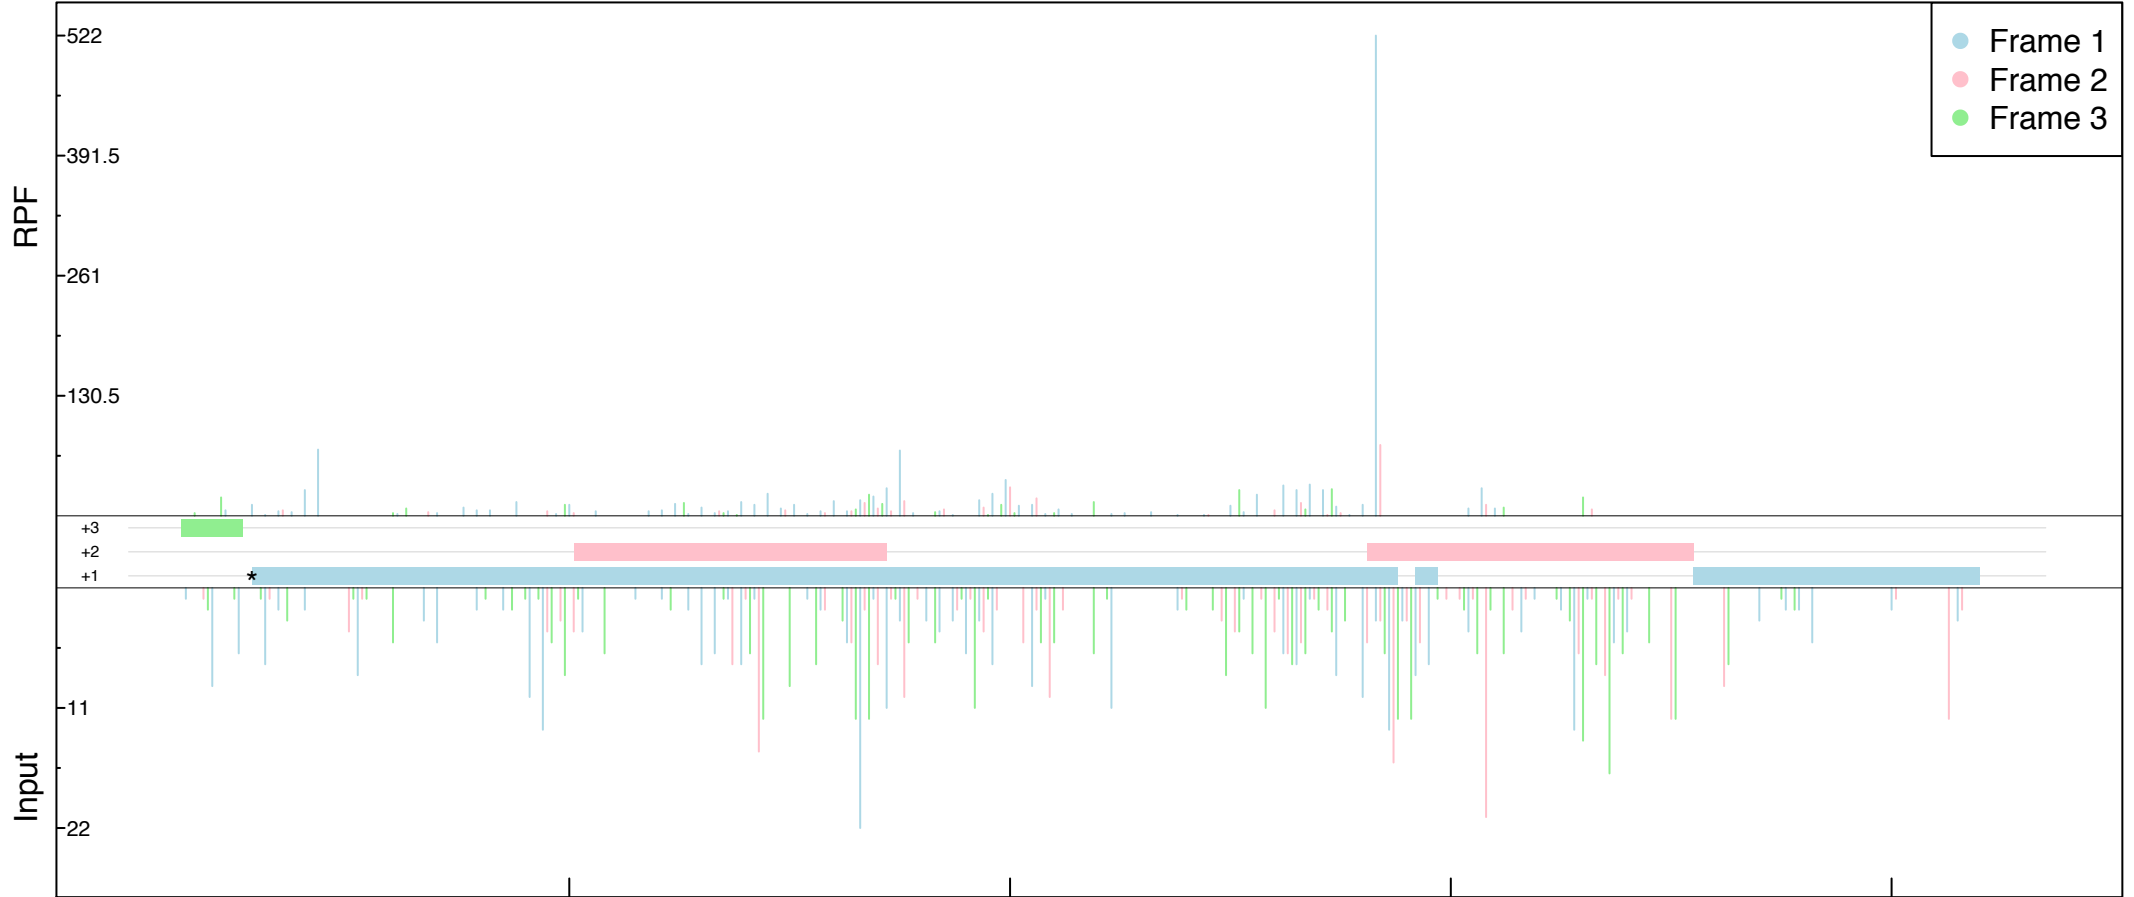

\*METTEAVLLLLLVCCWWRARQRHLDEEIMARRRFRKILAAARRKRAIERRRRLERQQRKQEWMMMMHYYYTNILCESDESDE

ENSDART00000140991, Global

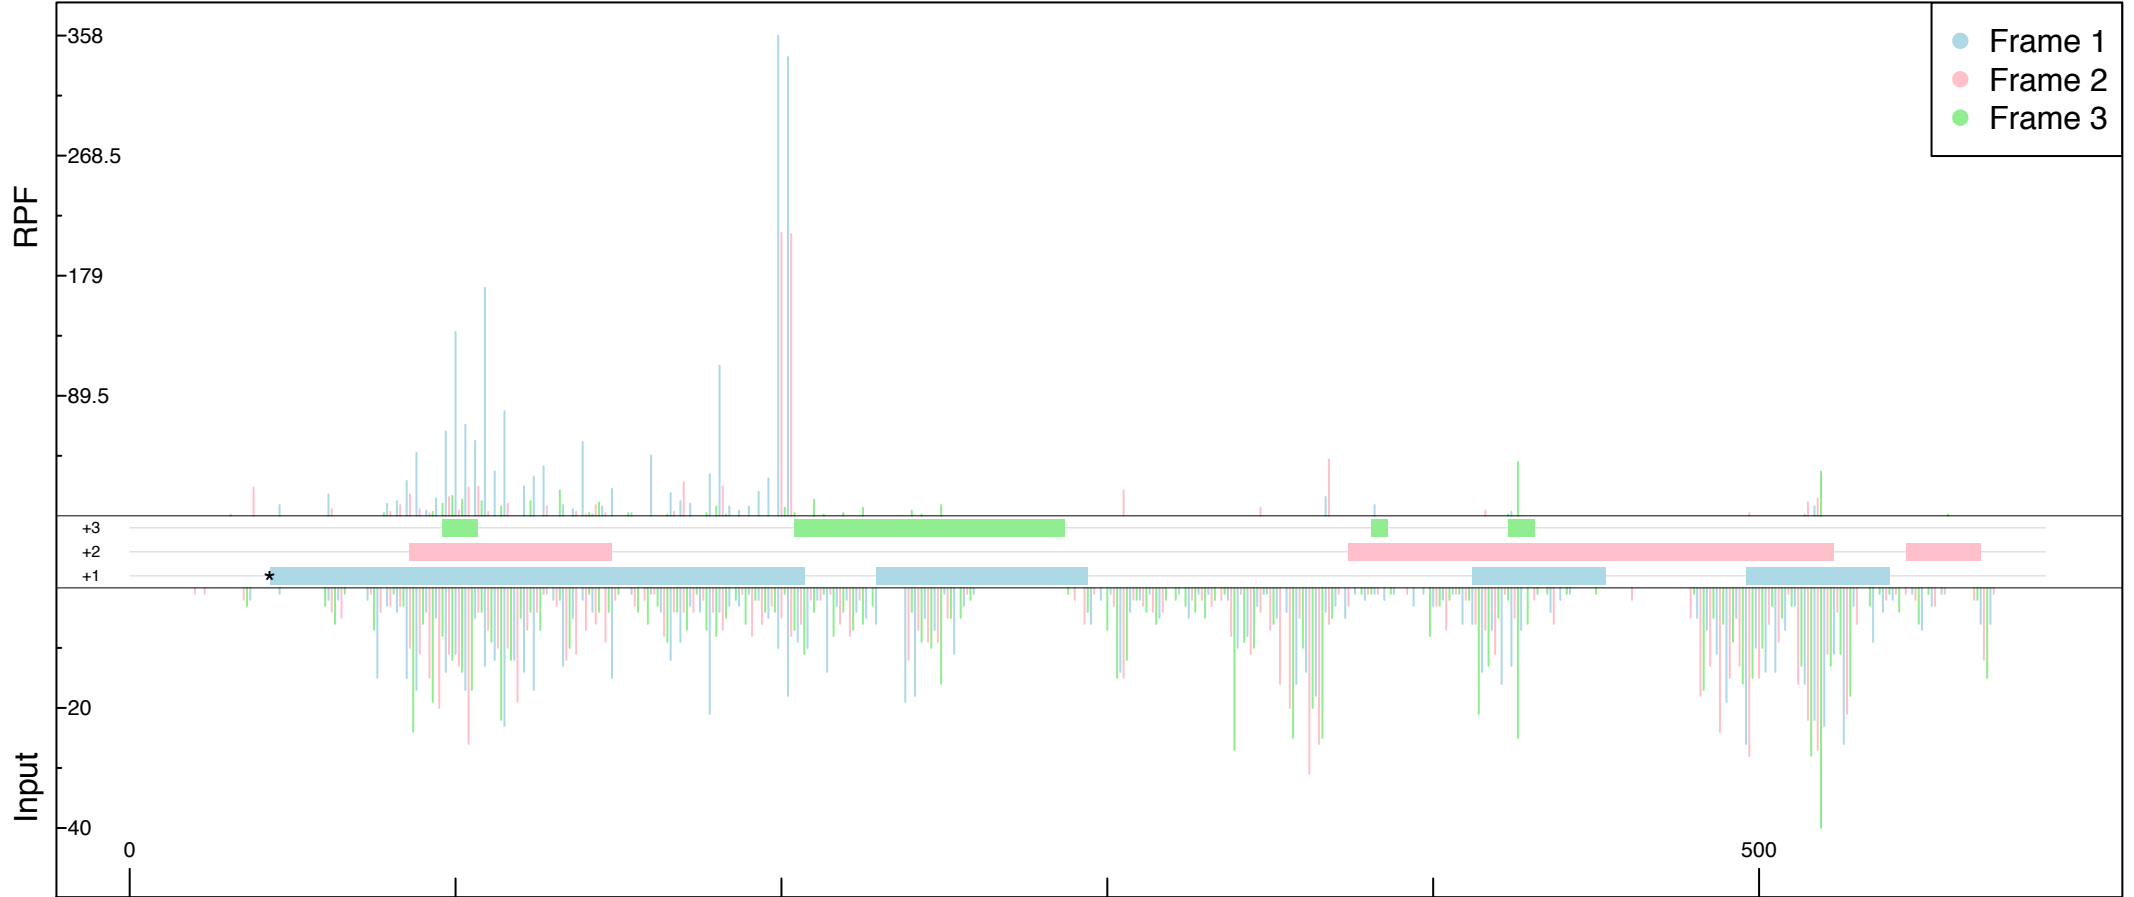

\*MTESSIFTRCLRNVYQRCANDCPDVLYNTAEQSLRRVSSCMHLPTCAIMKVTL



ENSDART00000132532, Global

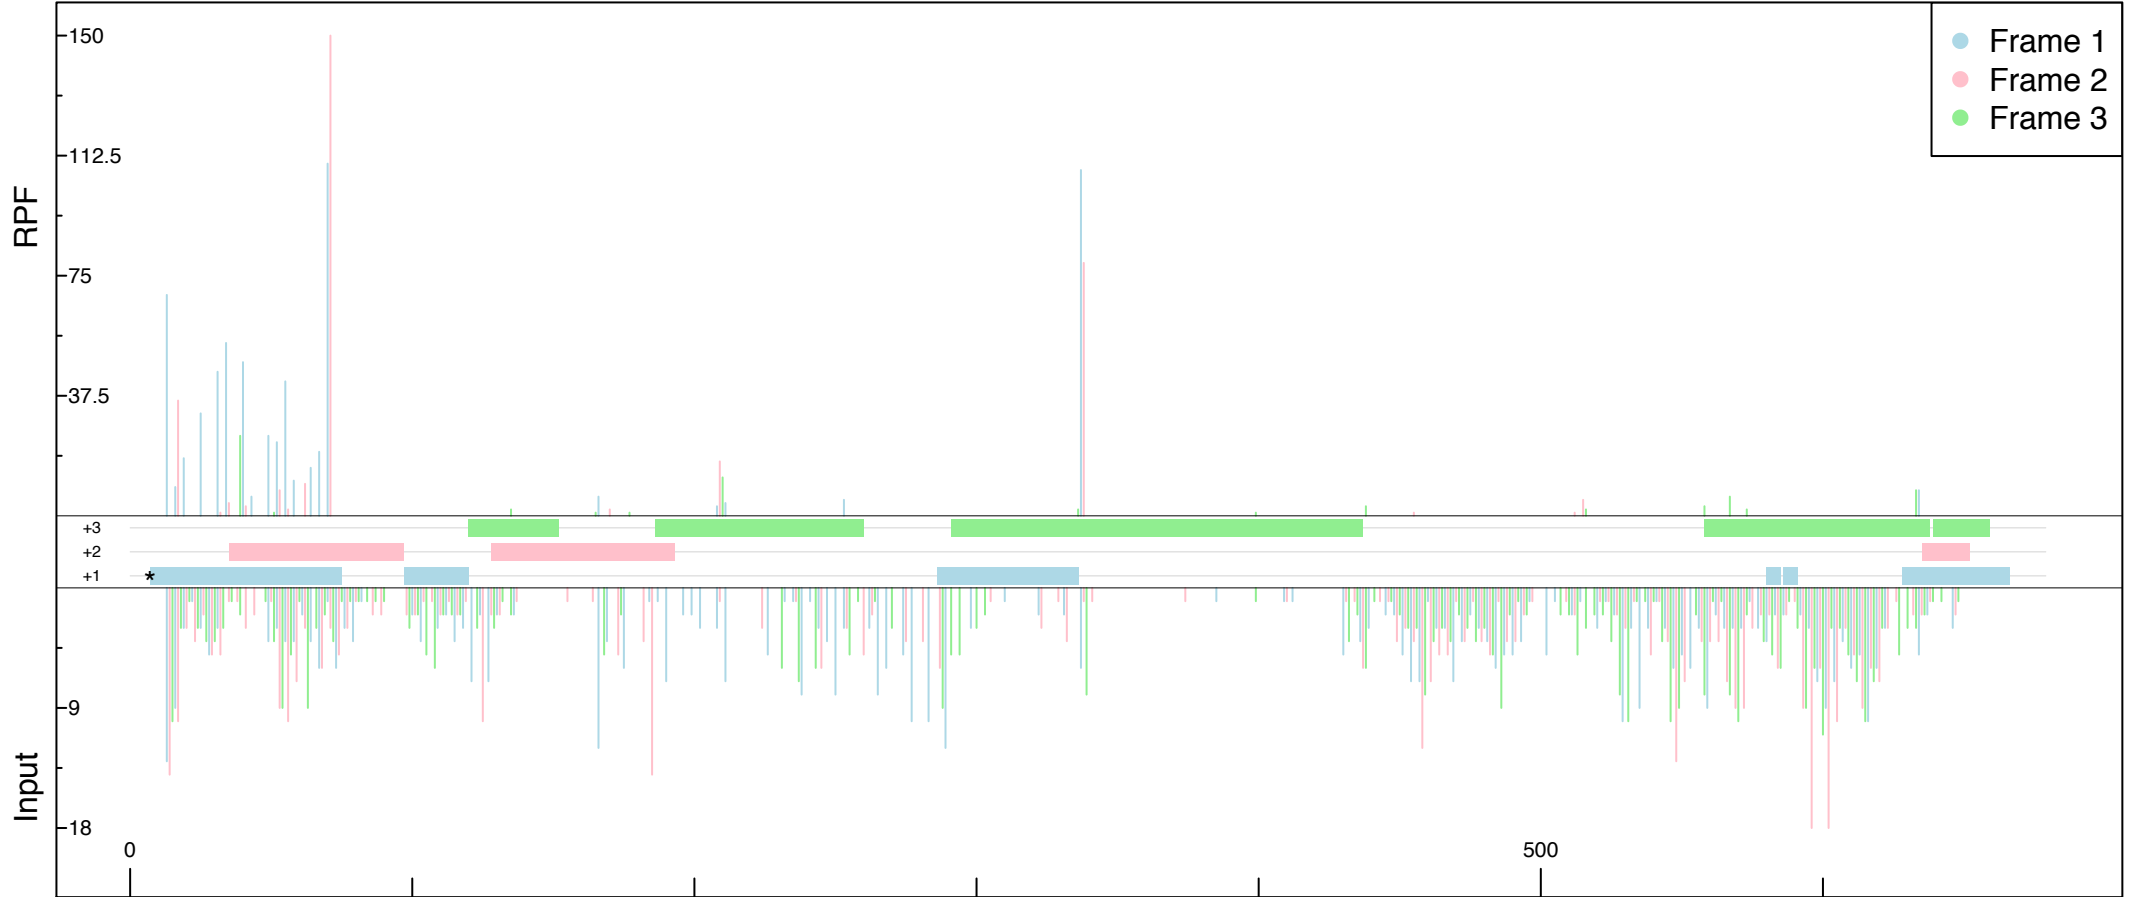

\*MPTSTMCGRNEHKKTERLQEGG

# ENSDART00000142040, Global

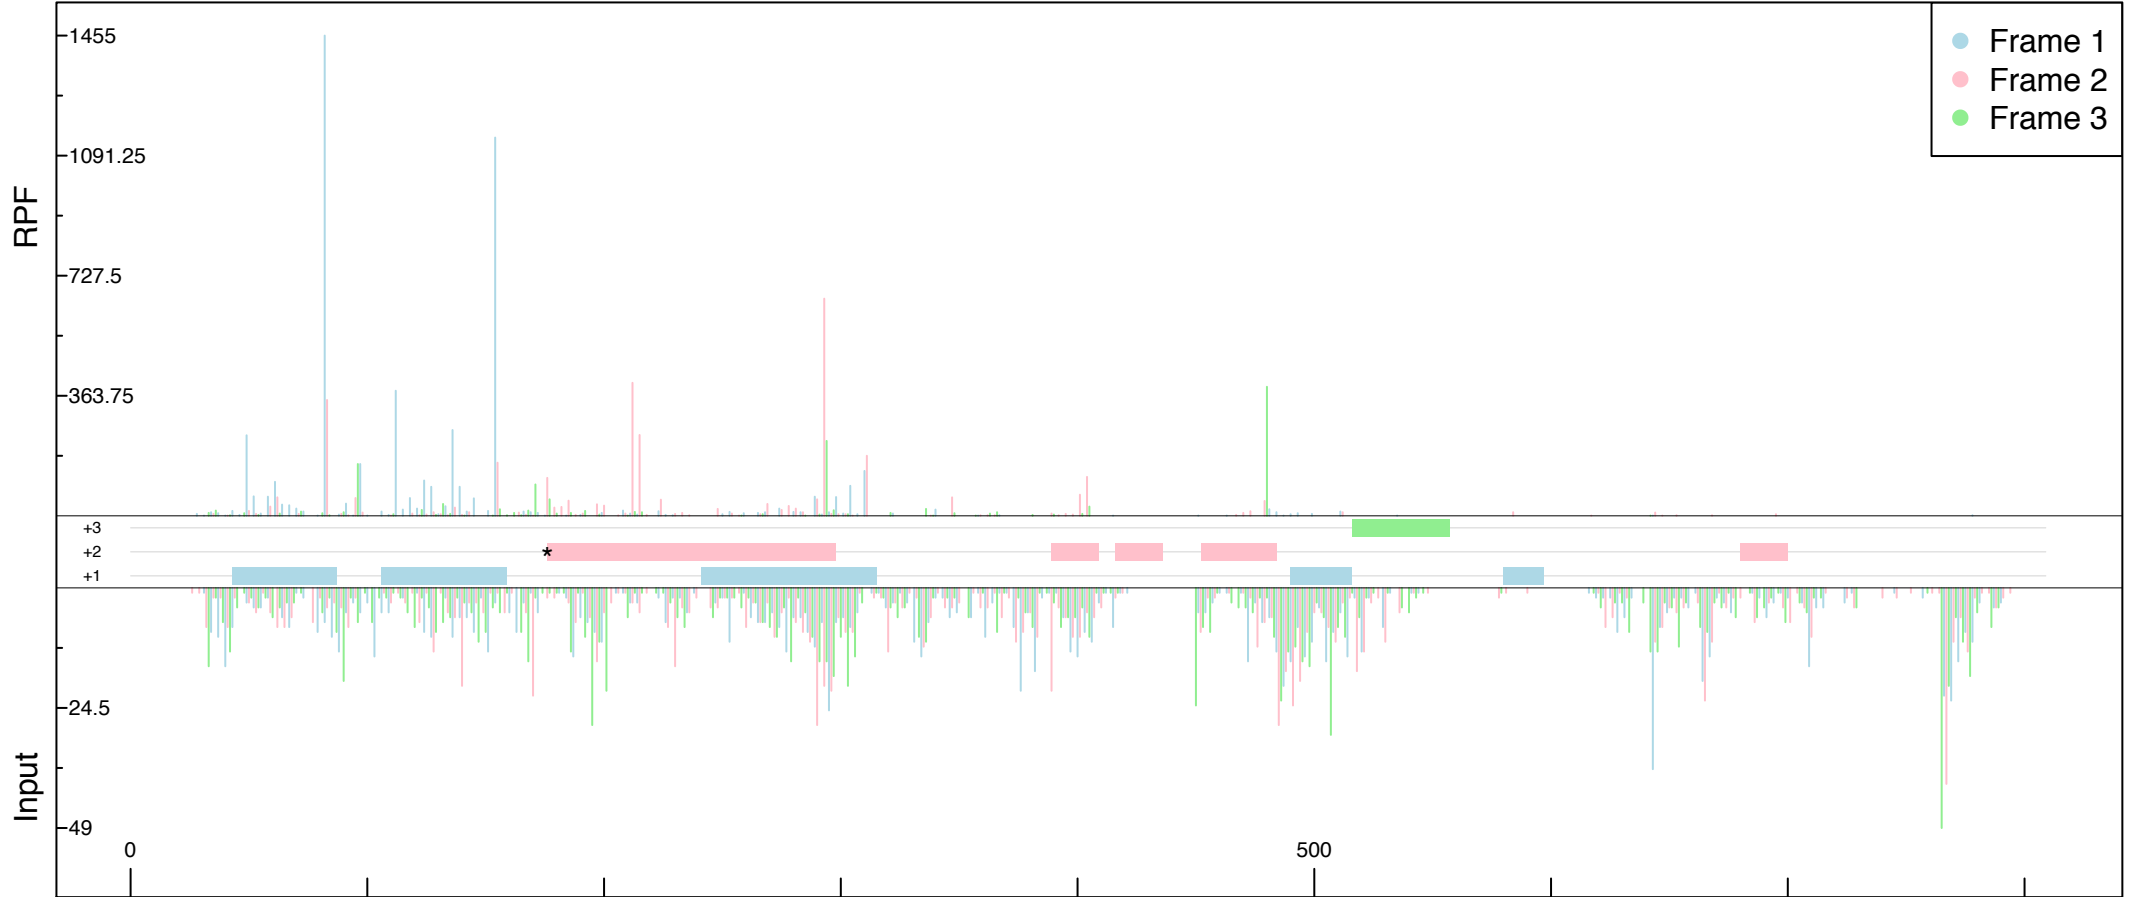

\*MKKNYLEQRGWIKARLTEVLKSCNVIKQQLGLILTKPKQT

linc-csnk1a1, Global

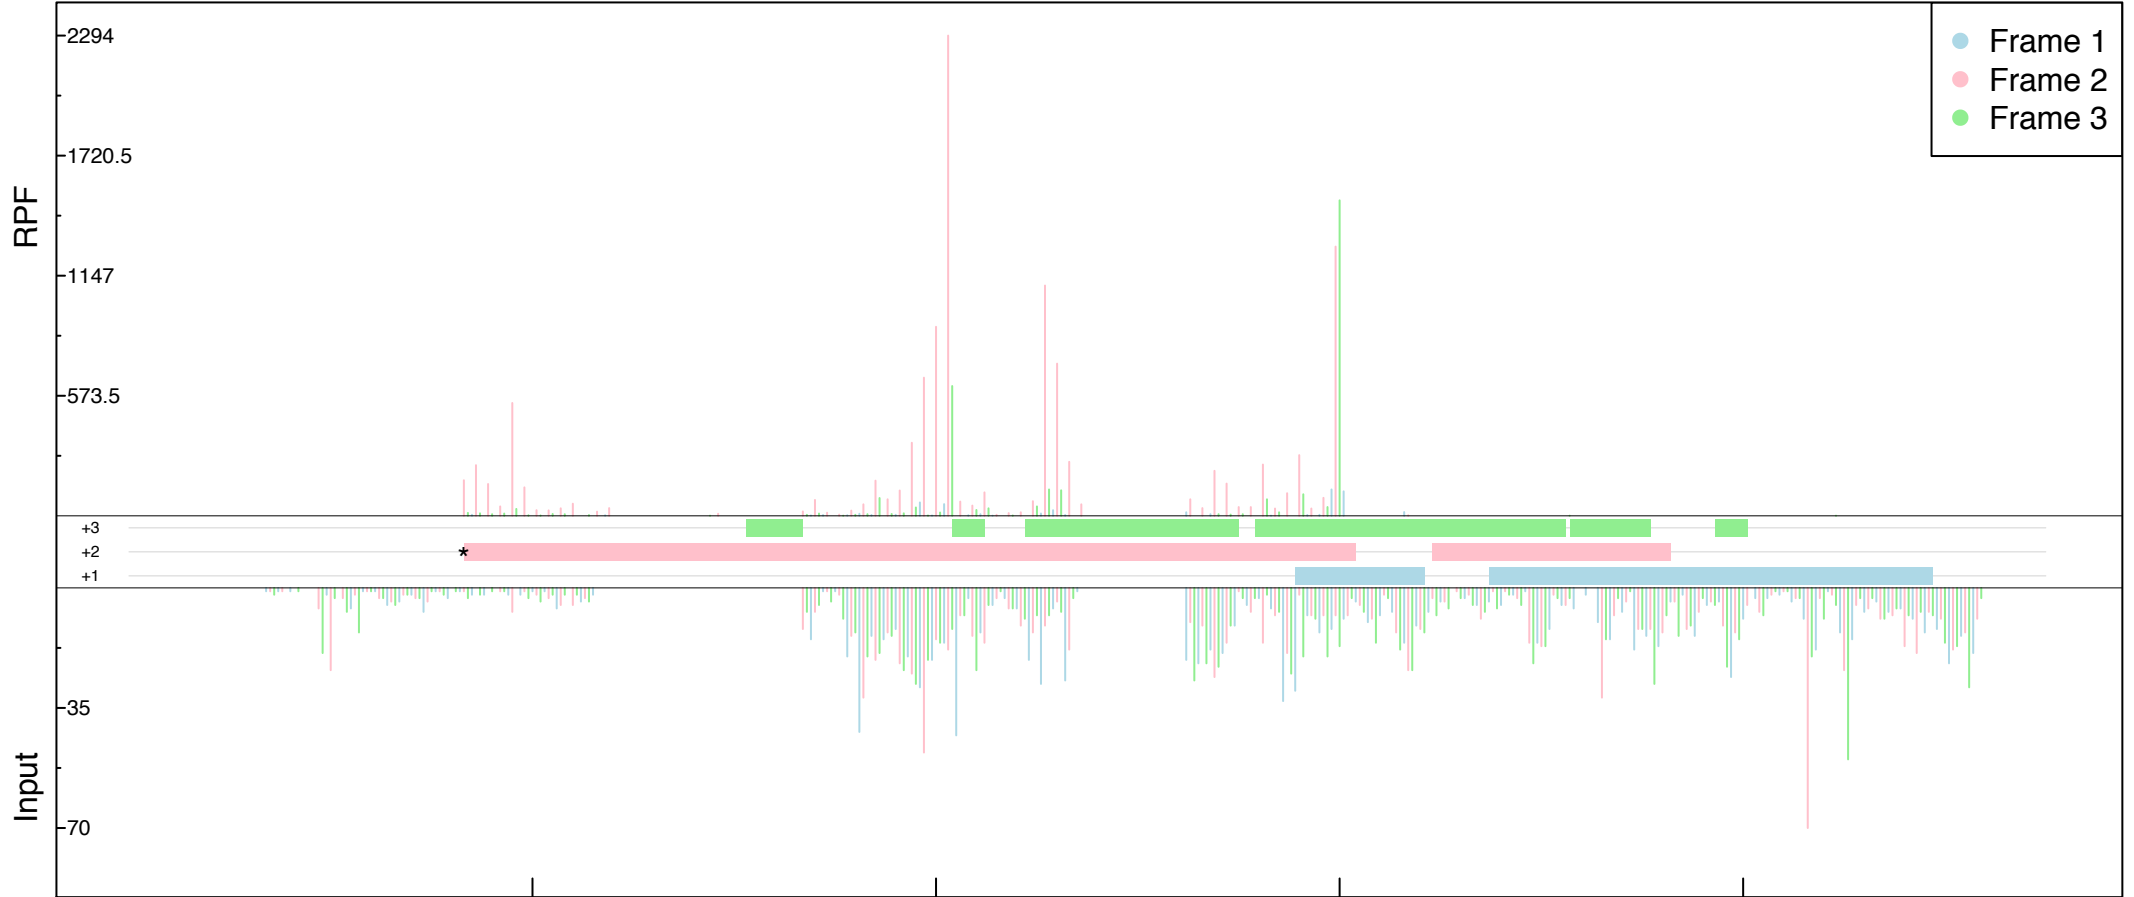

\*MKLAILVCVSVVFLTMVEAEATYESPIVCTREYKPVCGDDGITYSNECMLRWESNAKEVVVNVKHEGKCESS

ENSDART00000132701, Global

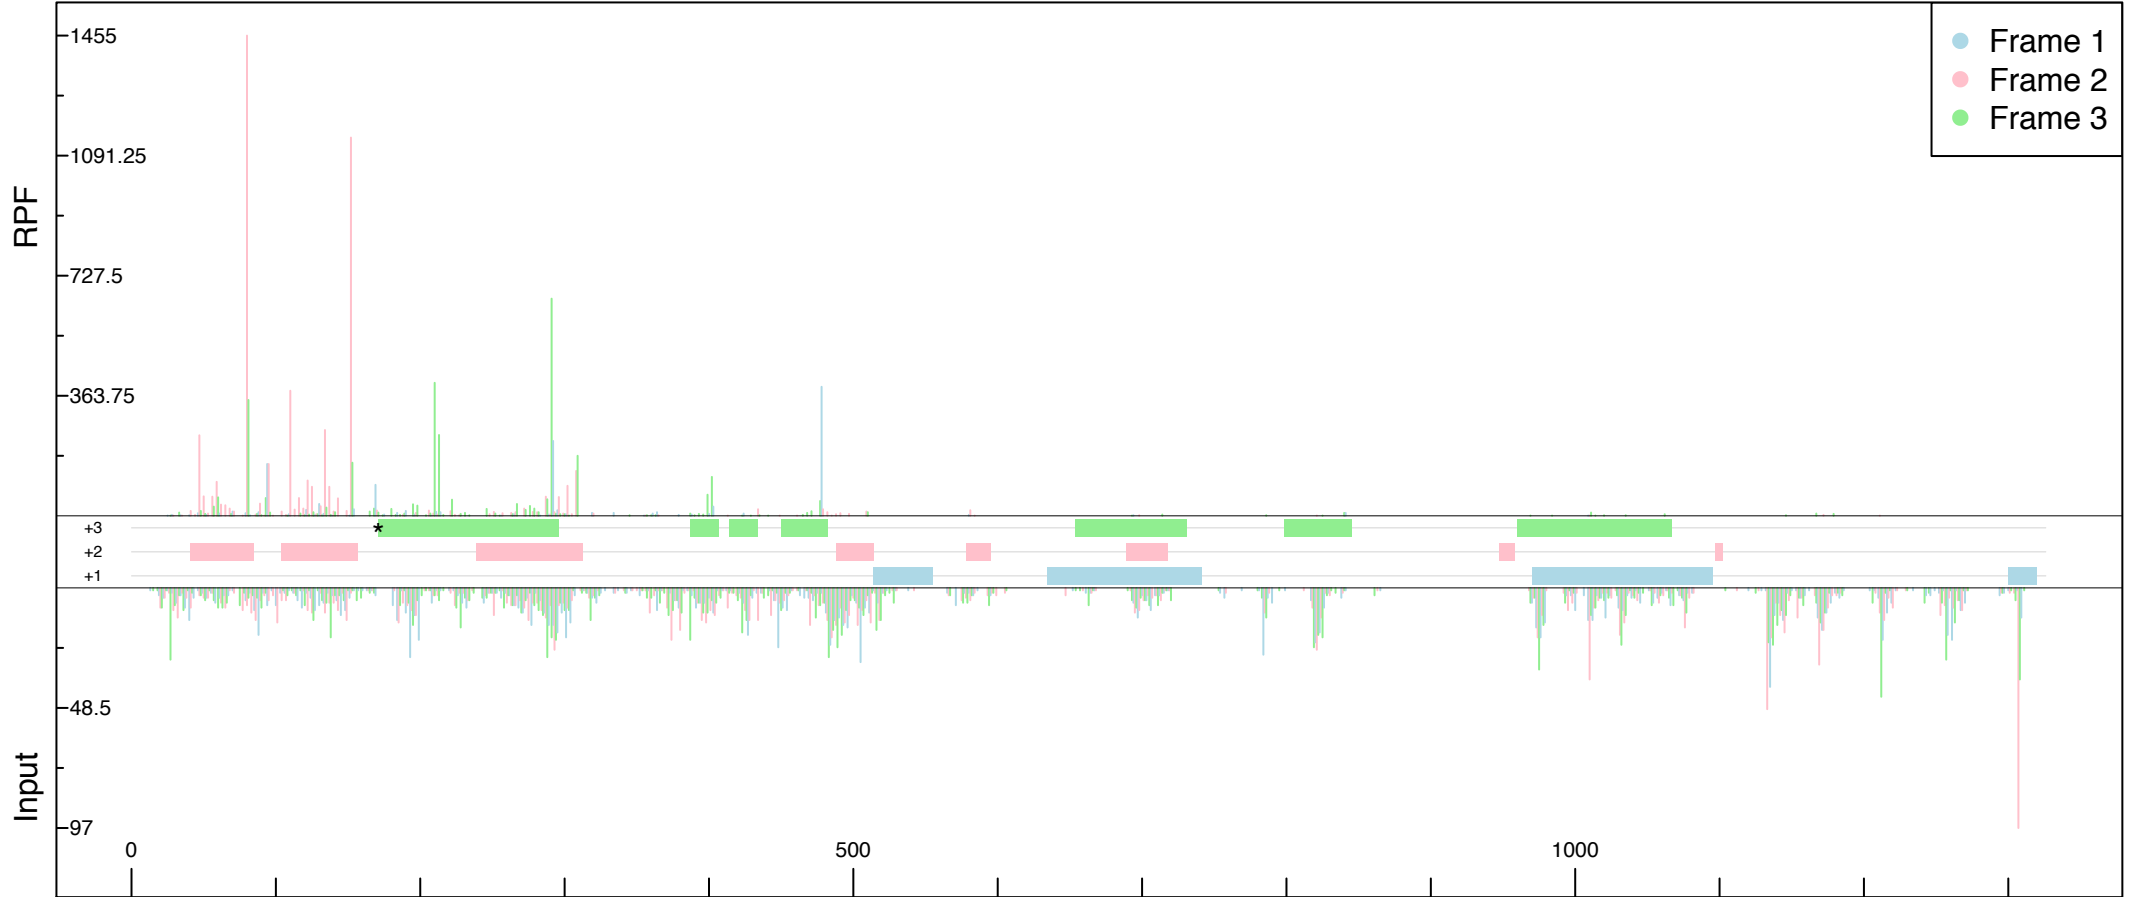

\*MMKKNYLEQRGWIKARLTEVLKSCNVIKQQLGLILTKPKQT

ENSDART00000134021, Global

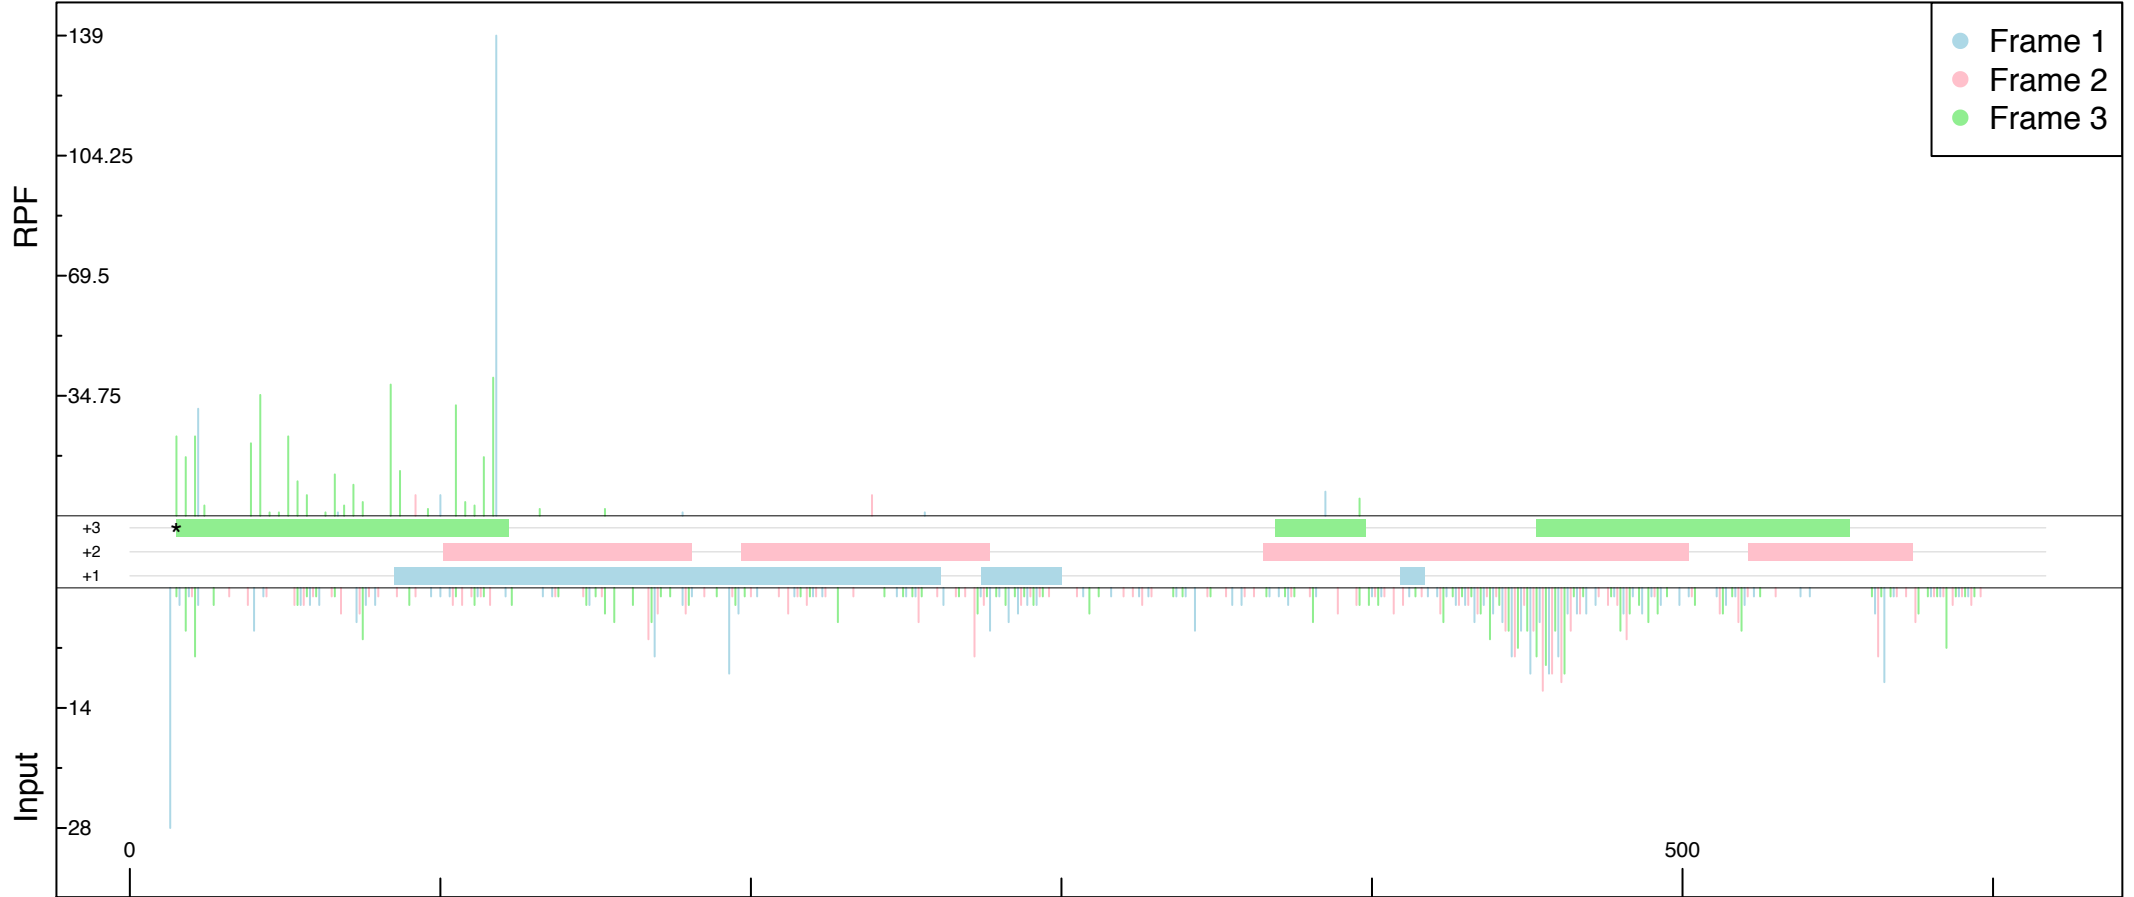

\*MLVLWDKMILLSERRFLCANIPSHDGGSAWKHGPG

# linc-trmt11, Global

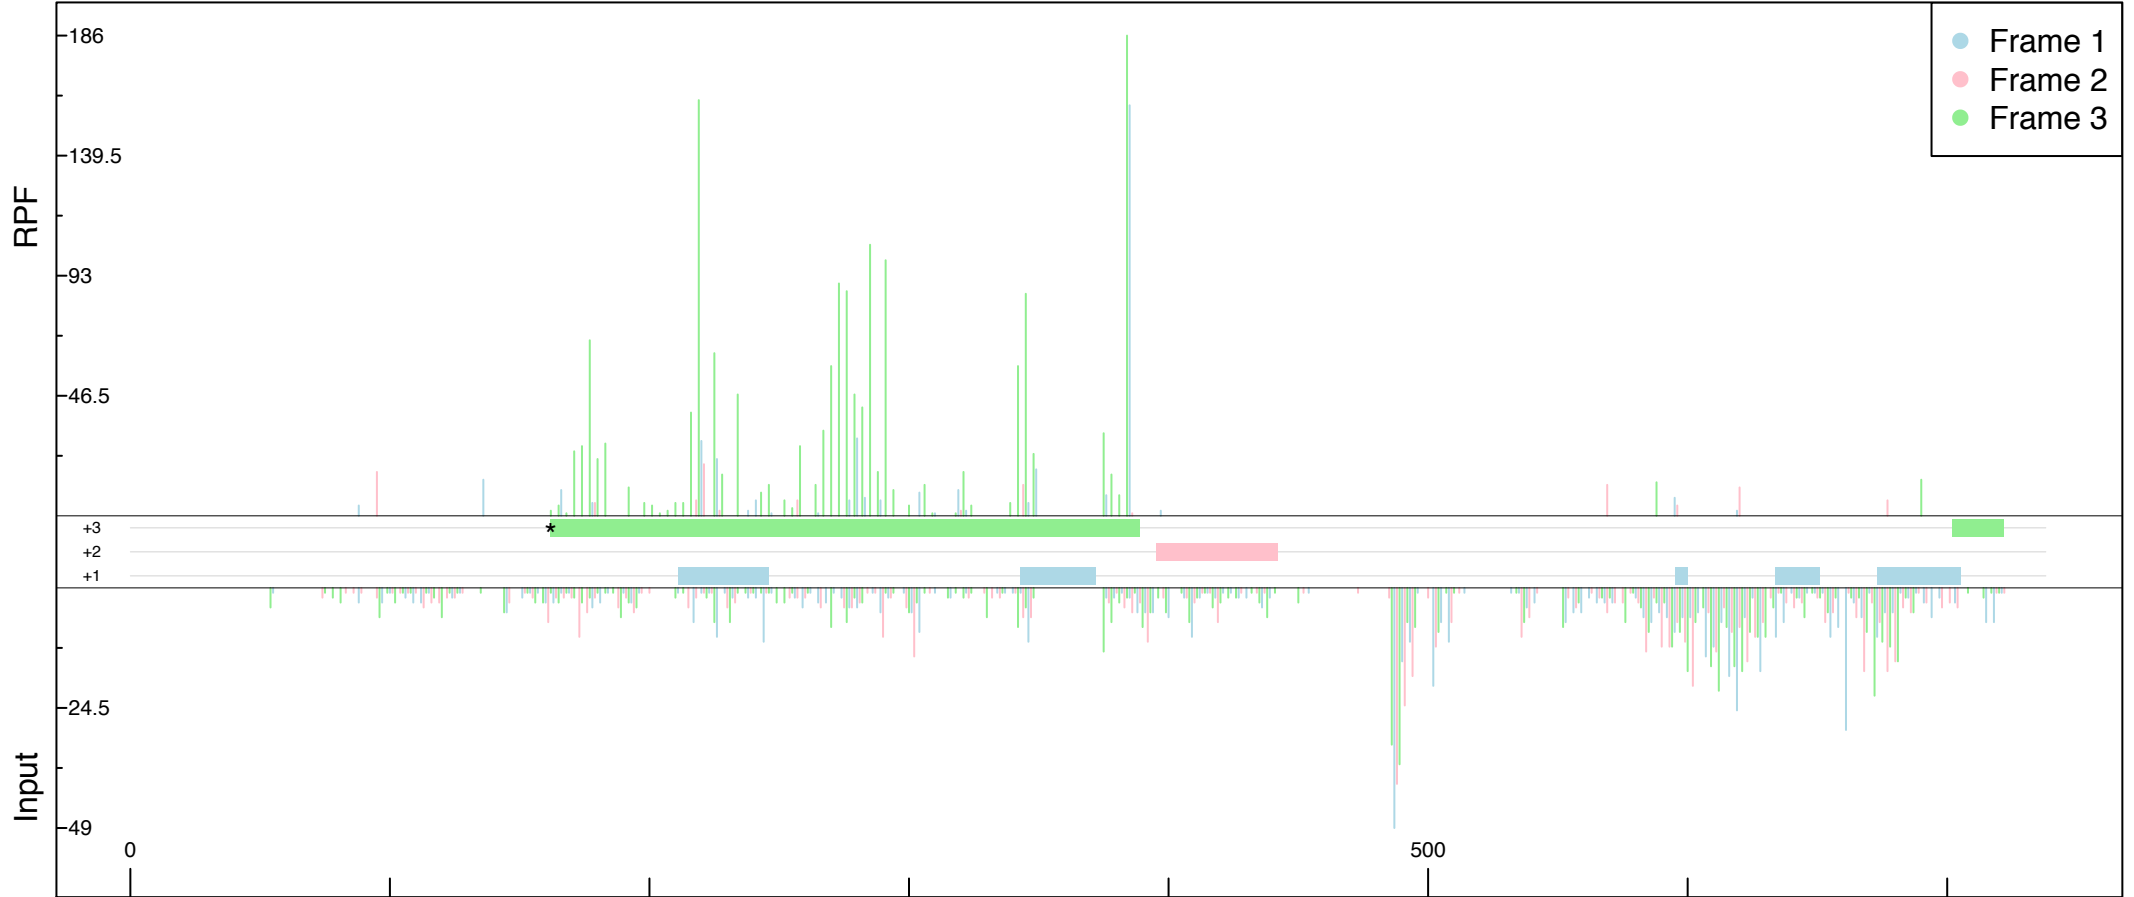

\*MSKKAPRAALKHHMKKNANIRIGKNADLMAQLNLLMVLHRLAEECRVKAFEEKSATIKTHHVRVAKLLKSTRG

ENSDART00000149369, Global

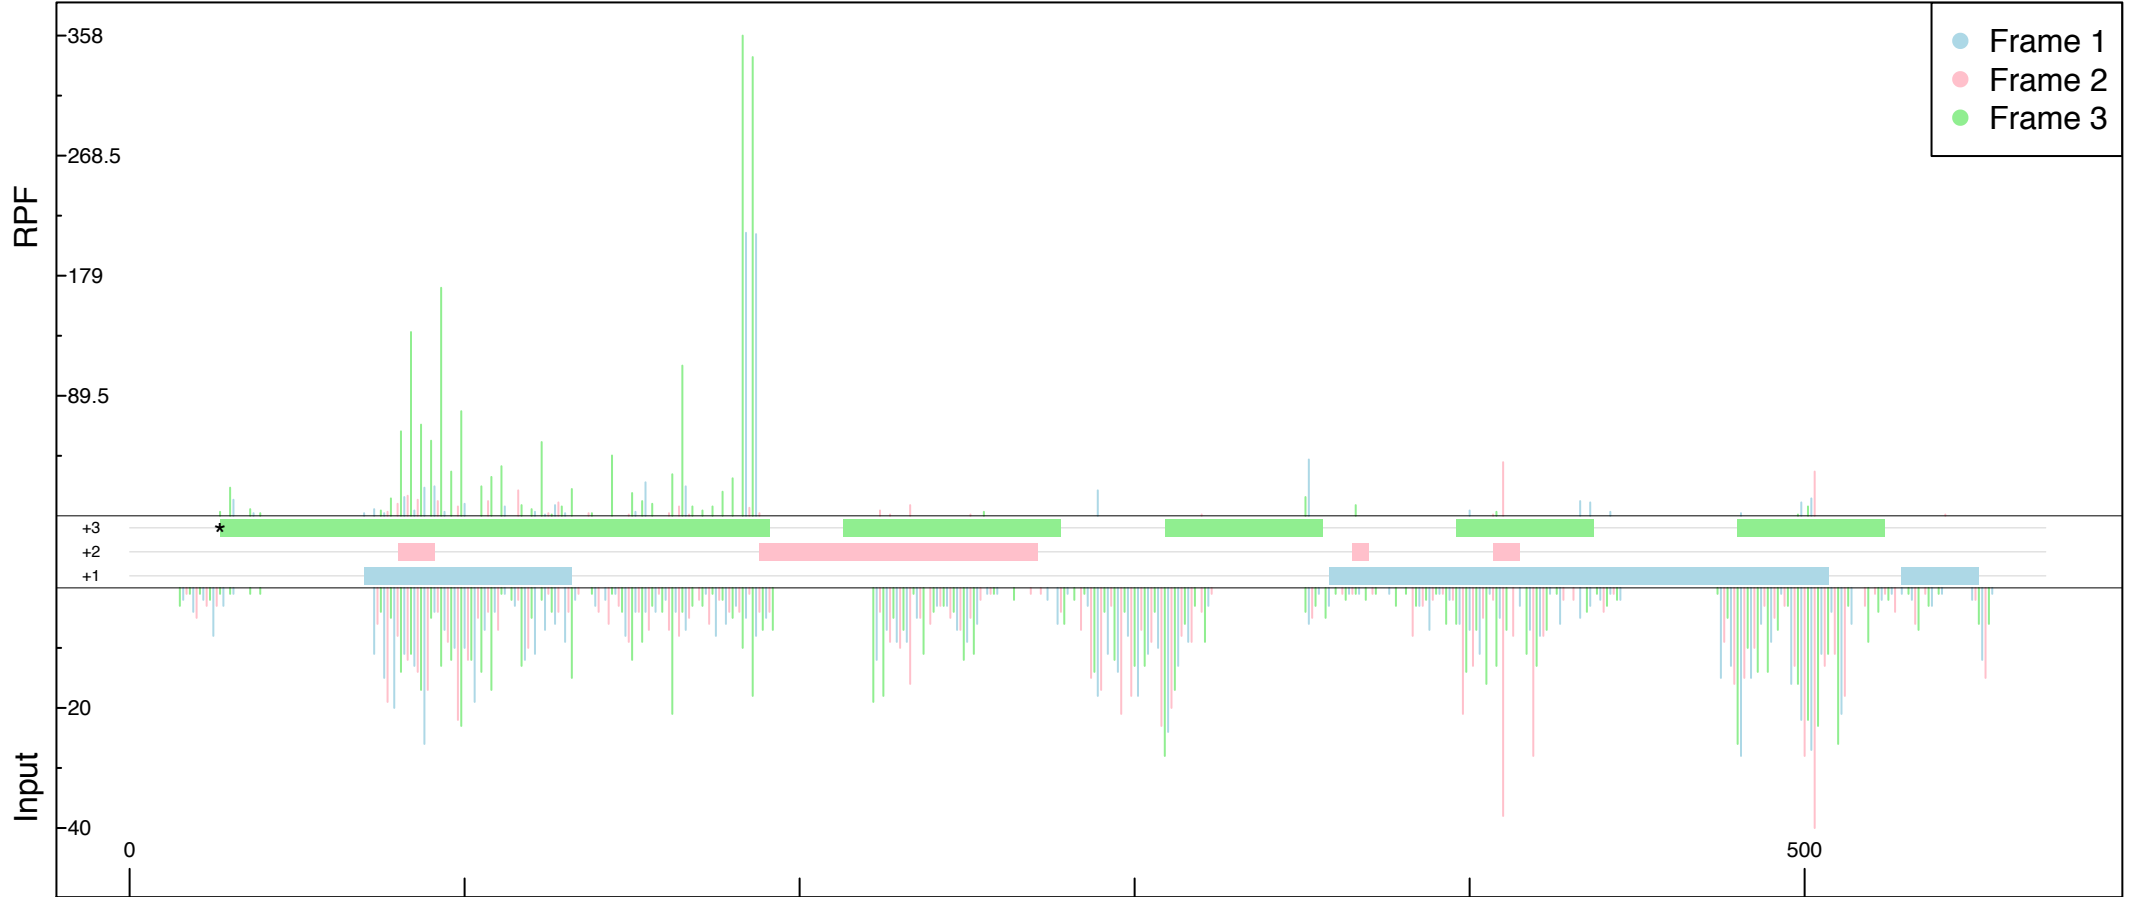

\*MAESSIFTRCLGVNYGQRCANDCPDVLYNTAEQSLRRVSSCMHLPTCAIMKVTL

ENSDART00000136377, Global

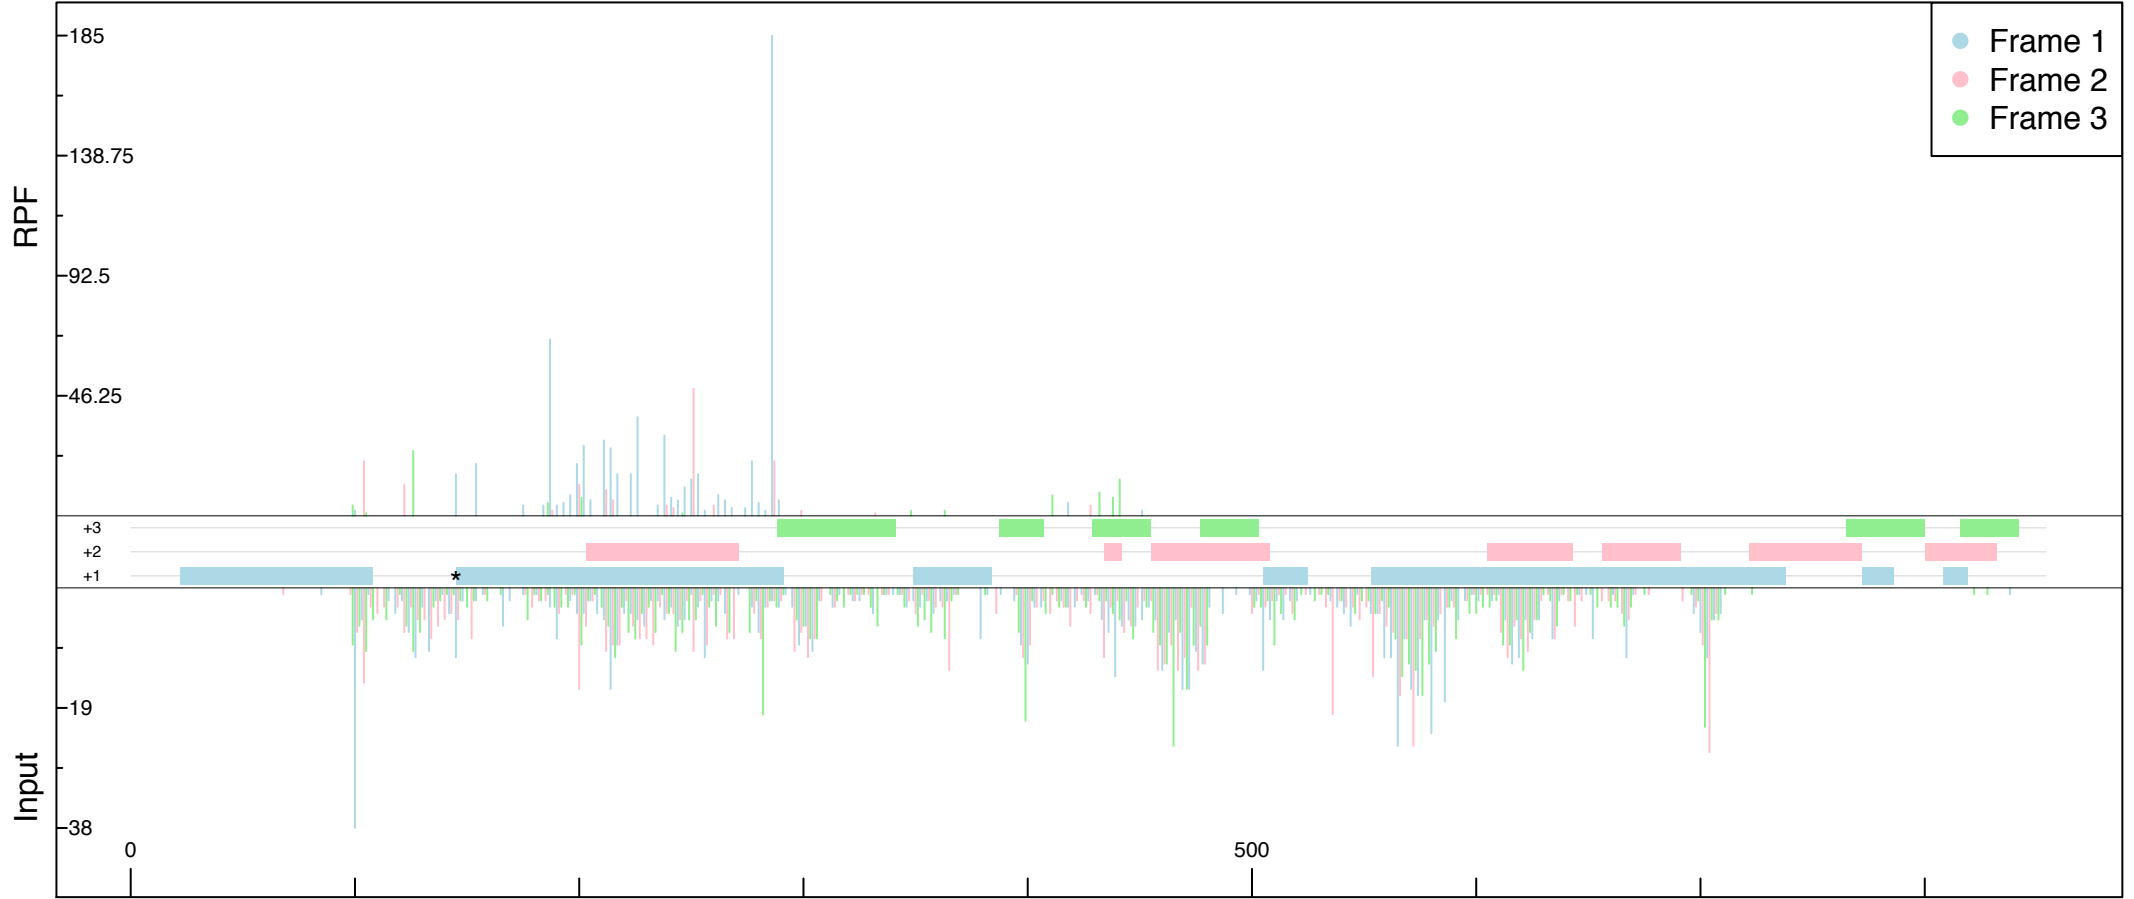

\*M<sup>R</sup>S<sup>L</sup>T<sup>K</sup>L<sup>Q</sup>Y<sup>N</sup>T<sup>M</sup>I<sup>Y</sup>Q<sup>D</sup>S<sup>I</sup>Q<sup>D</sup>V<sup>P</sup>Q<sup>E</sup>C<sup>G</sup>R<sup>G</sup>P<sup>V</sup>A<sup>L</sup>C<sup>G</sup>V<sup>C</sup>T<sup>S</sup>V<sup>E</sup>S<sup>I</sup>G<sup>K</sup>M<sup>P</sup>I<sup>K</sup>



ENSDART00000133863, Global

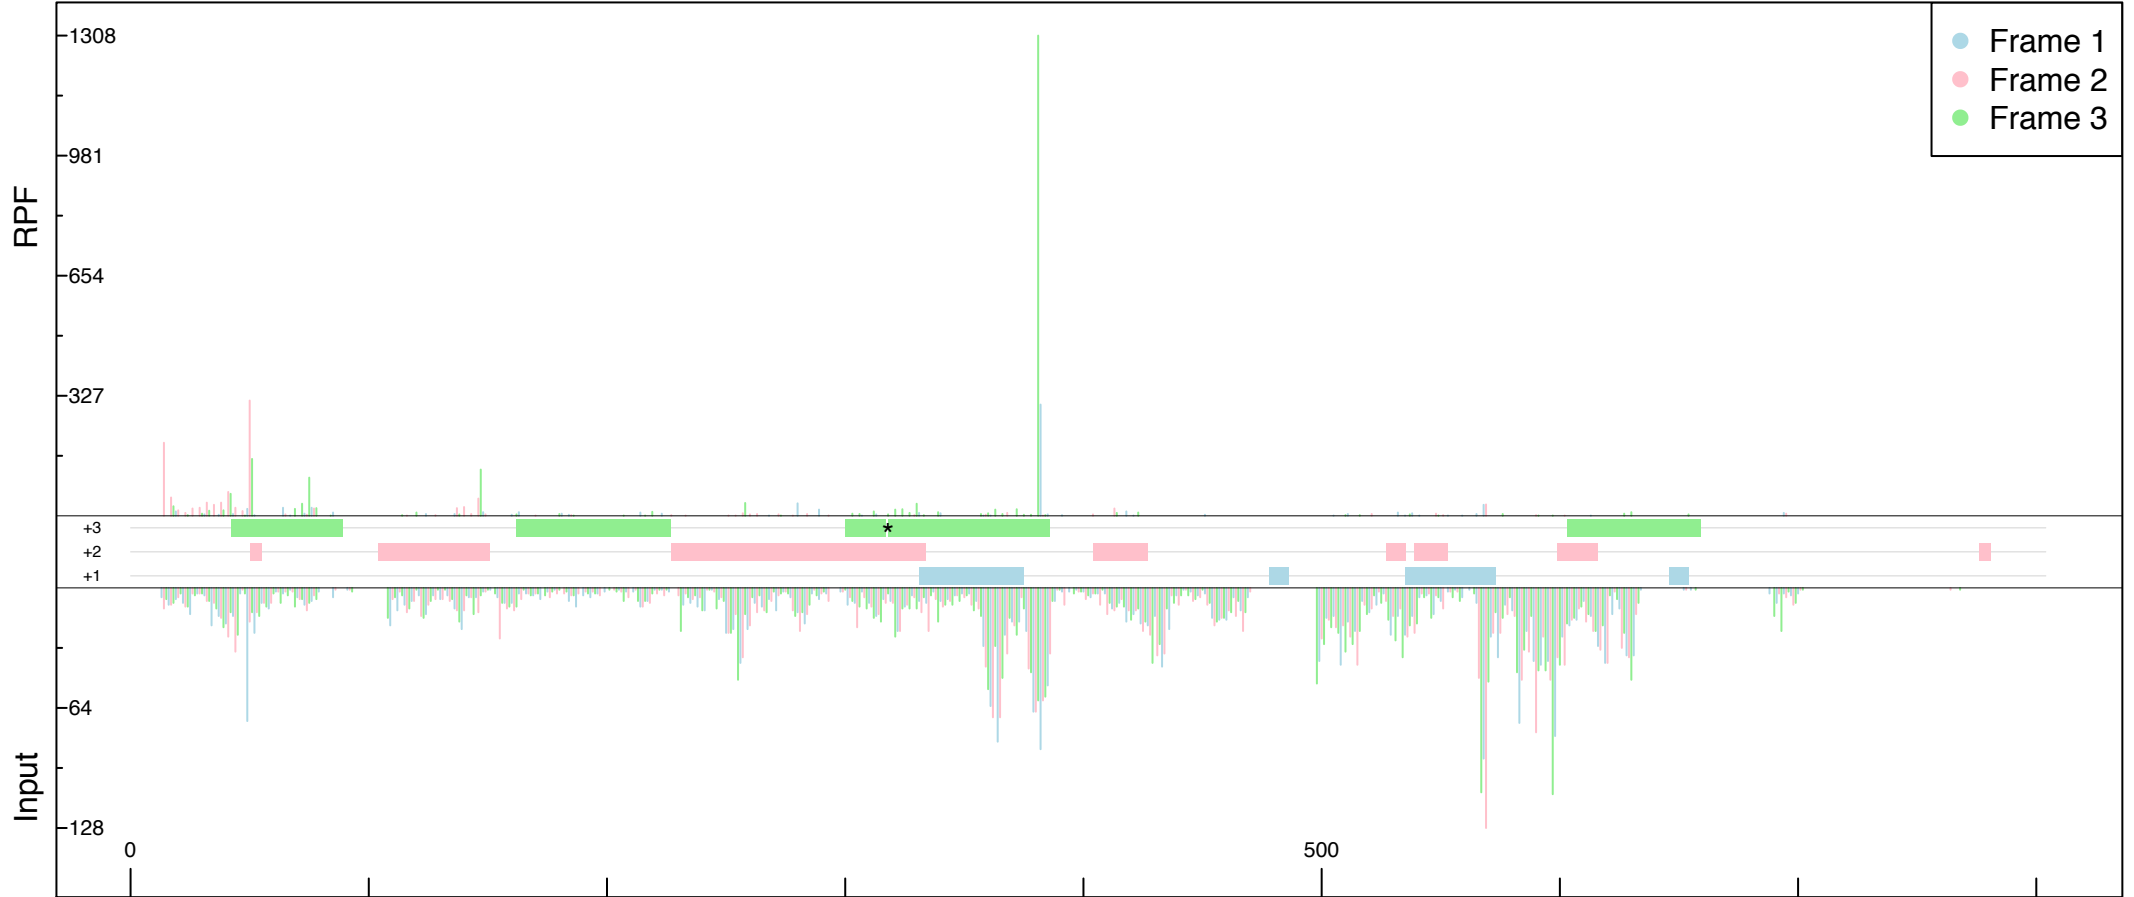

\*MMSVHDGLLLSEVFWSCCVSVT

ENSDART00000137673, Global

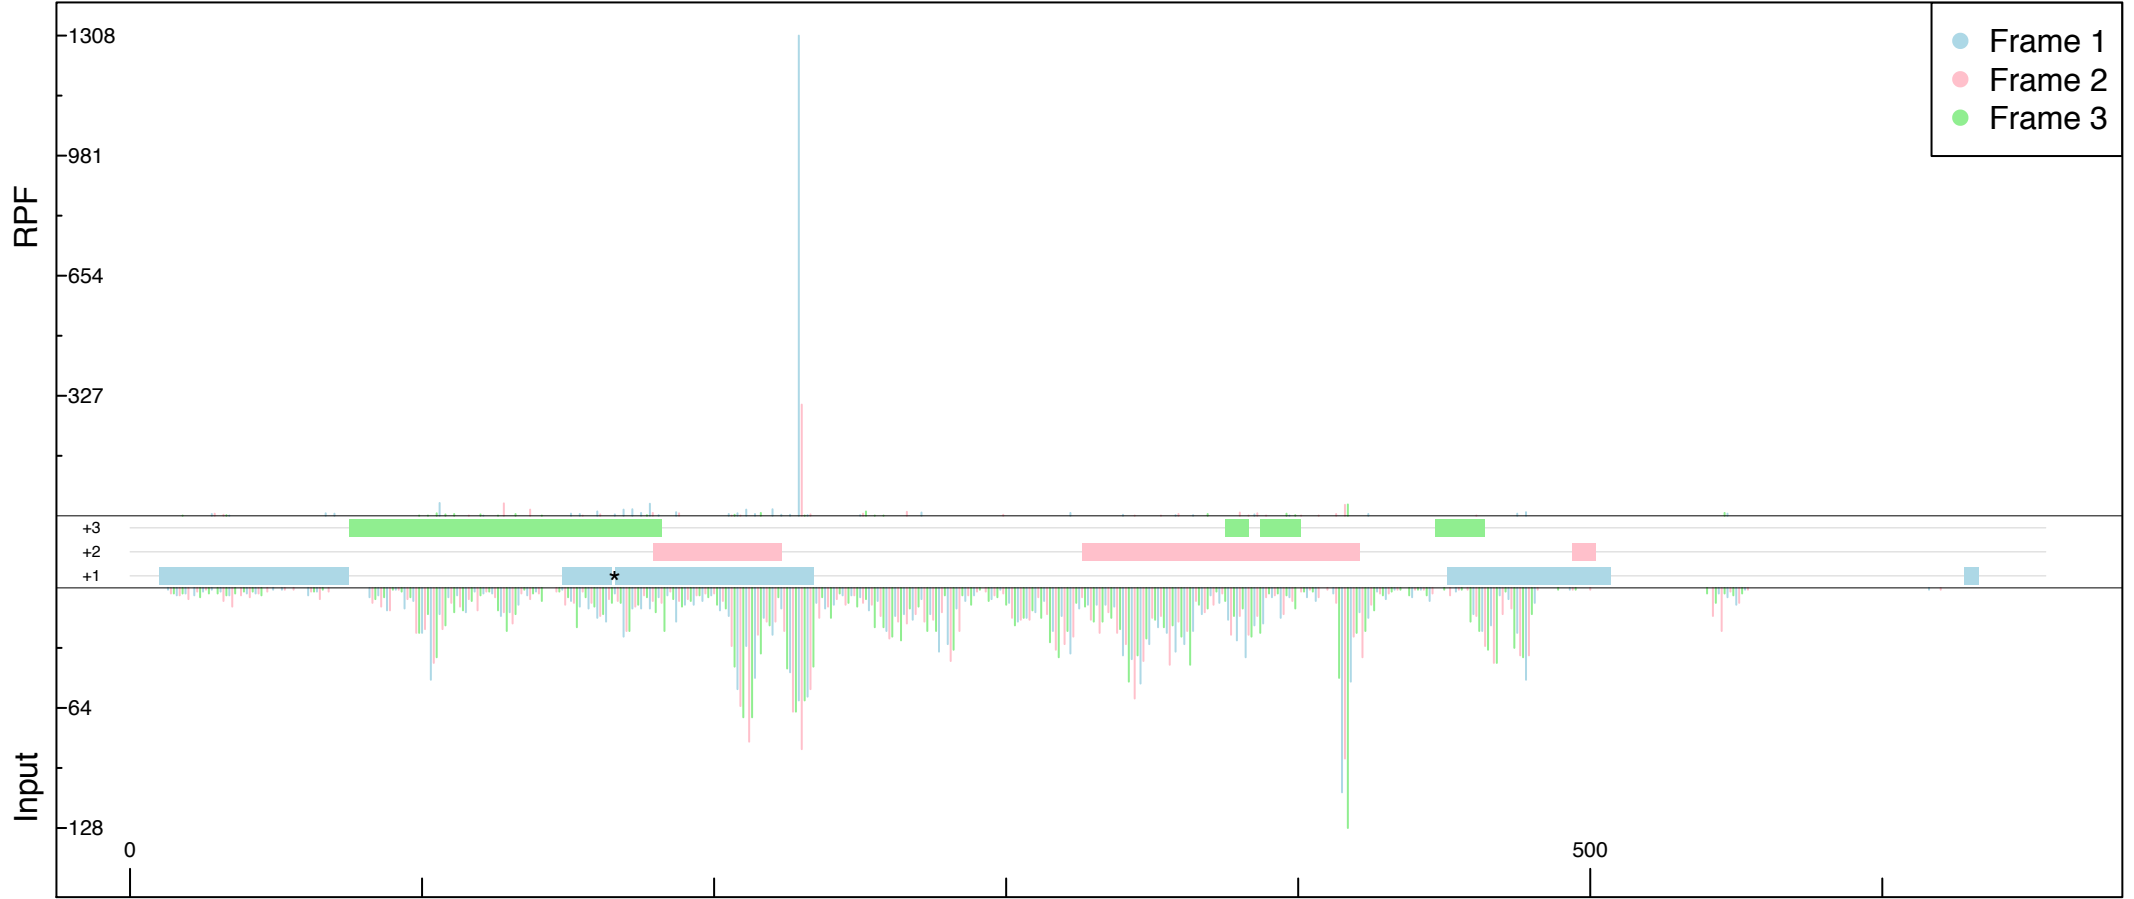

\*MMSVHDGLLLSEVFWSCCVSVT

# linc-mettl3, Global

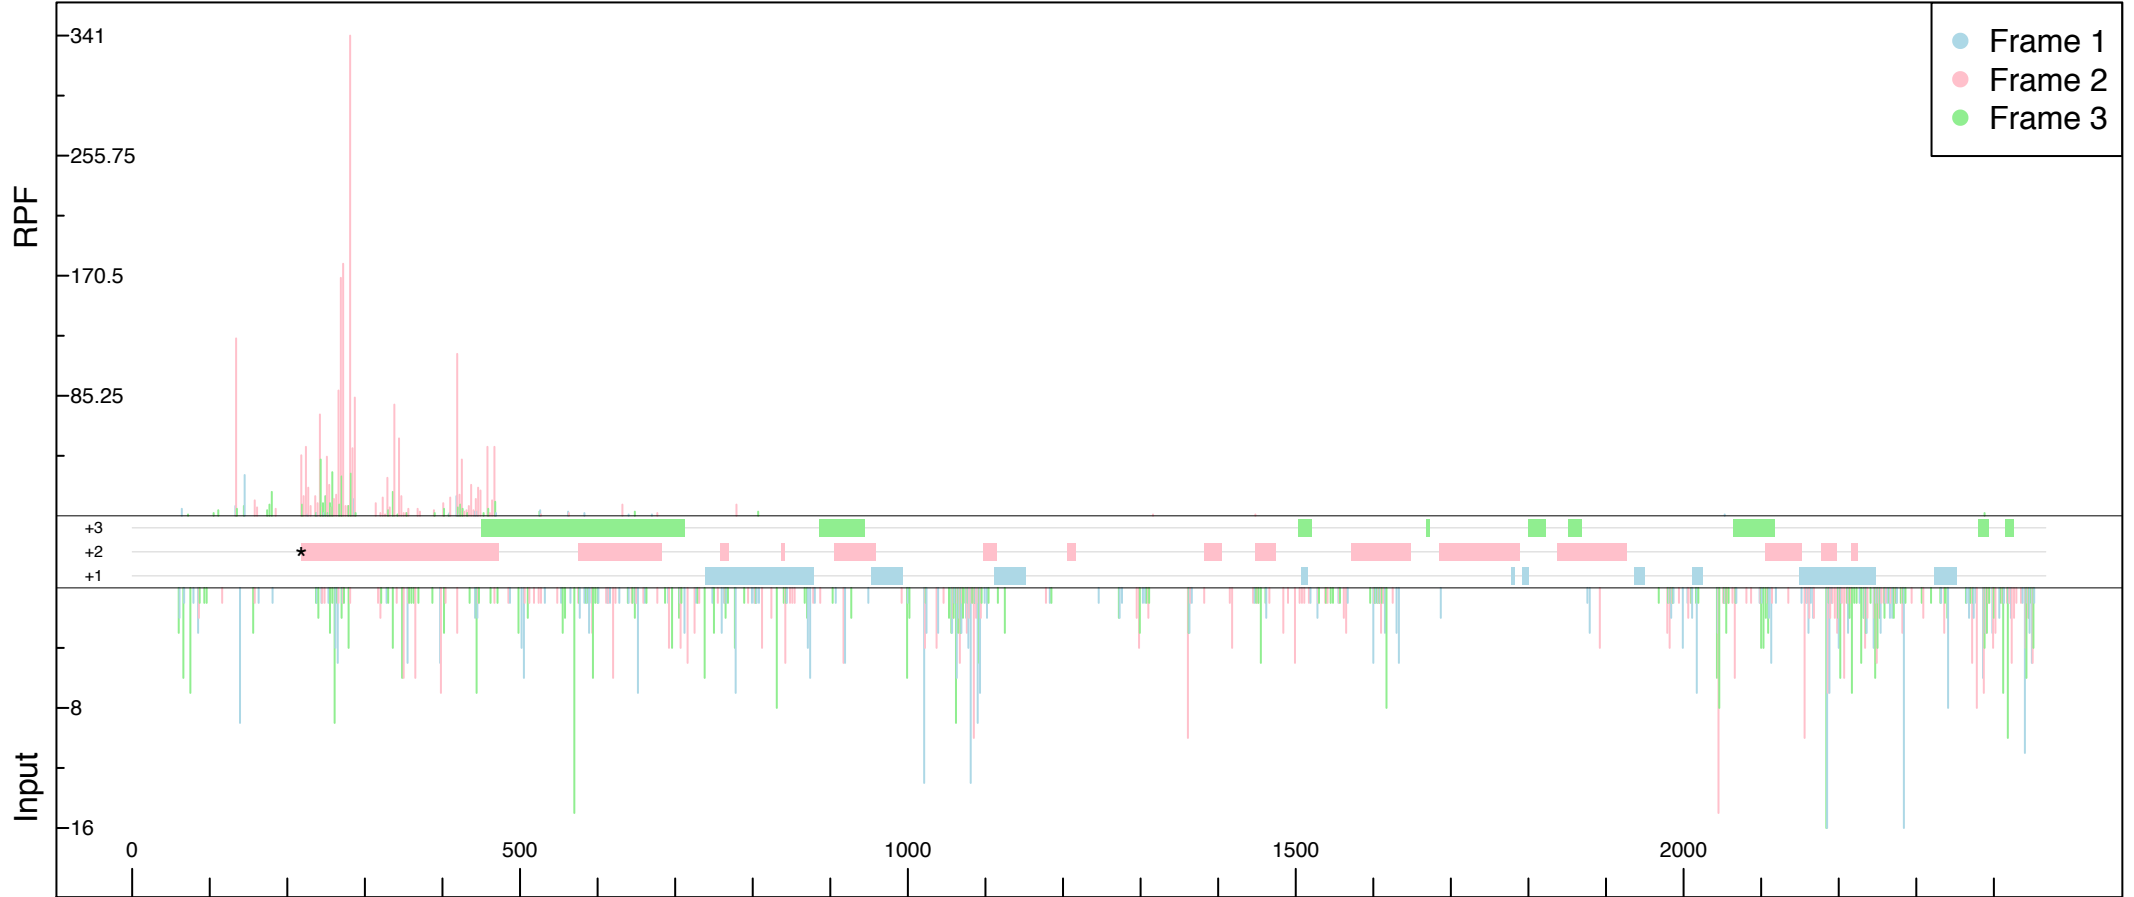

\*MGVKMLQCFFFYRRCKERCKRQCPPETAVVSEELKPRLCSTTSWGSEGDSSSGISCPQAYFSHKARLSLRHQMDSNINAVDATY

ENSDART00000131511, Global

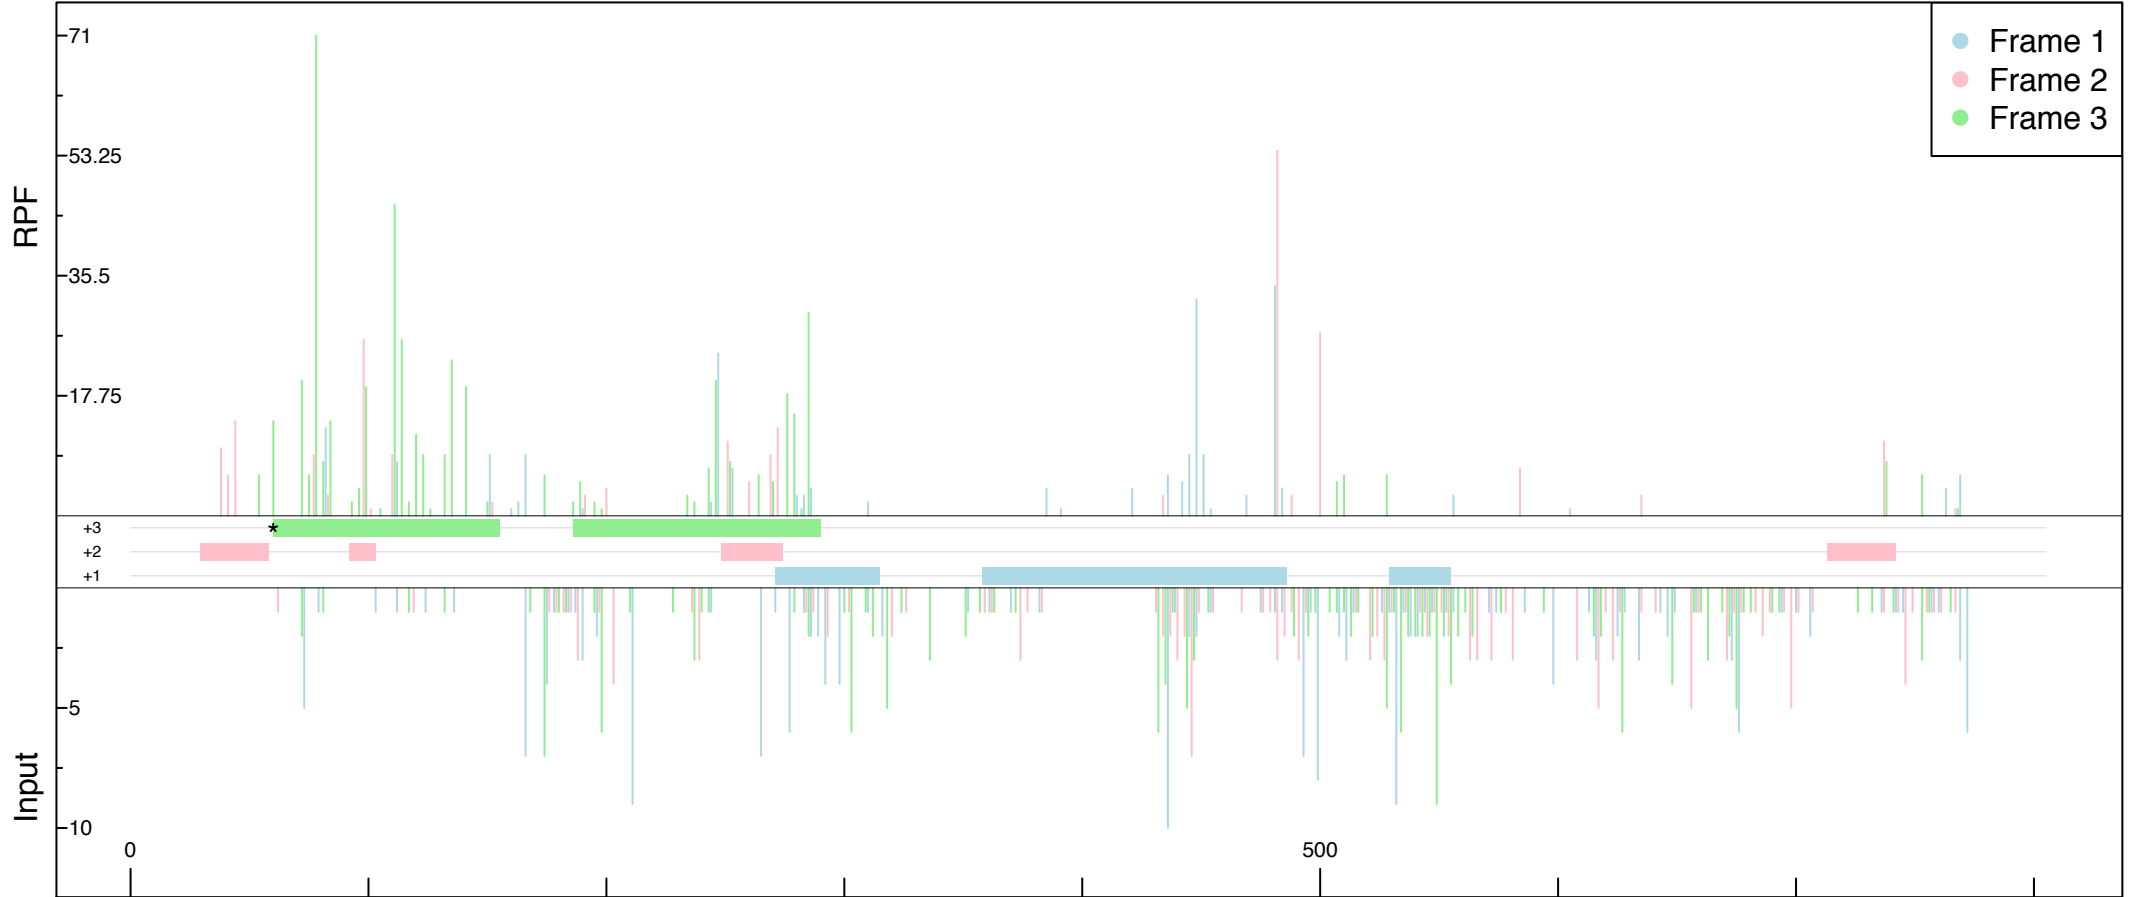

\*MDNCVKIKLKECNLEELIPTFEAQERTFPRF

# ENSDART00000133482, Global

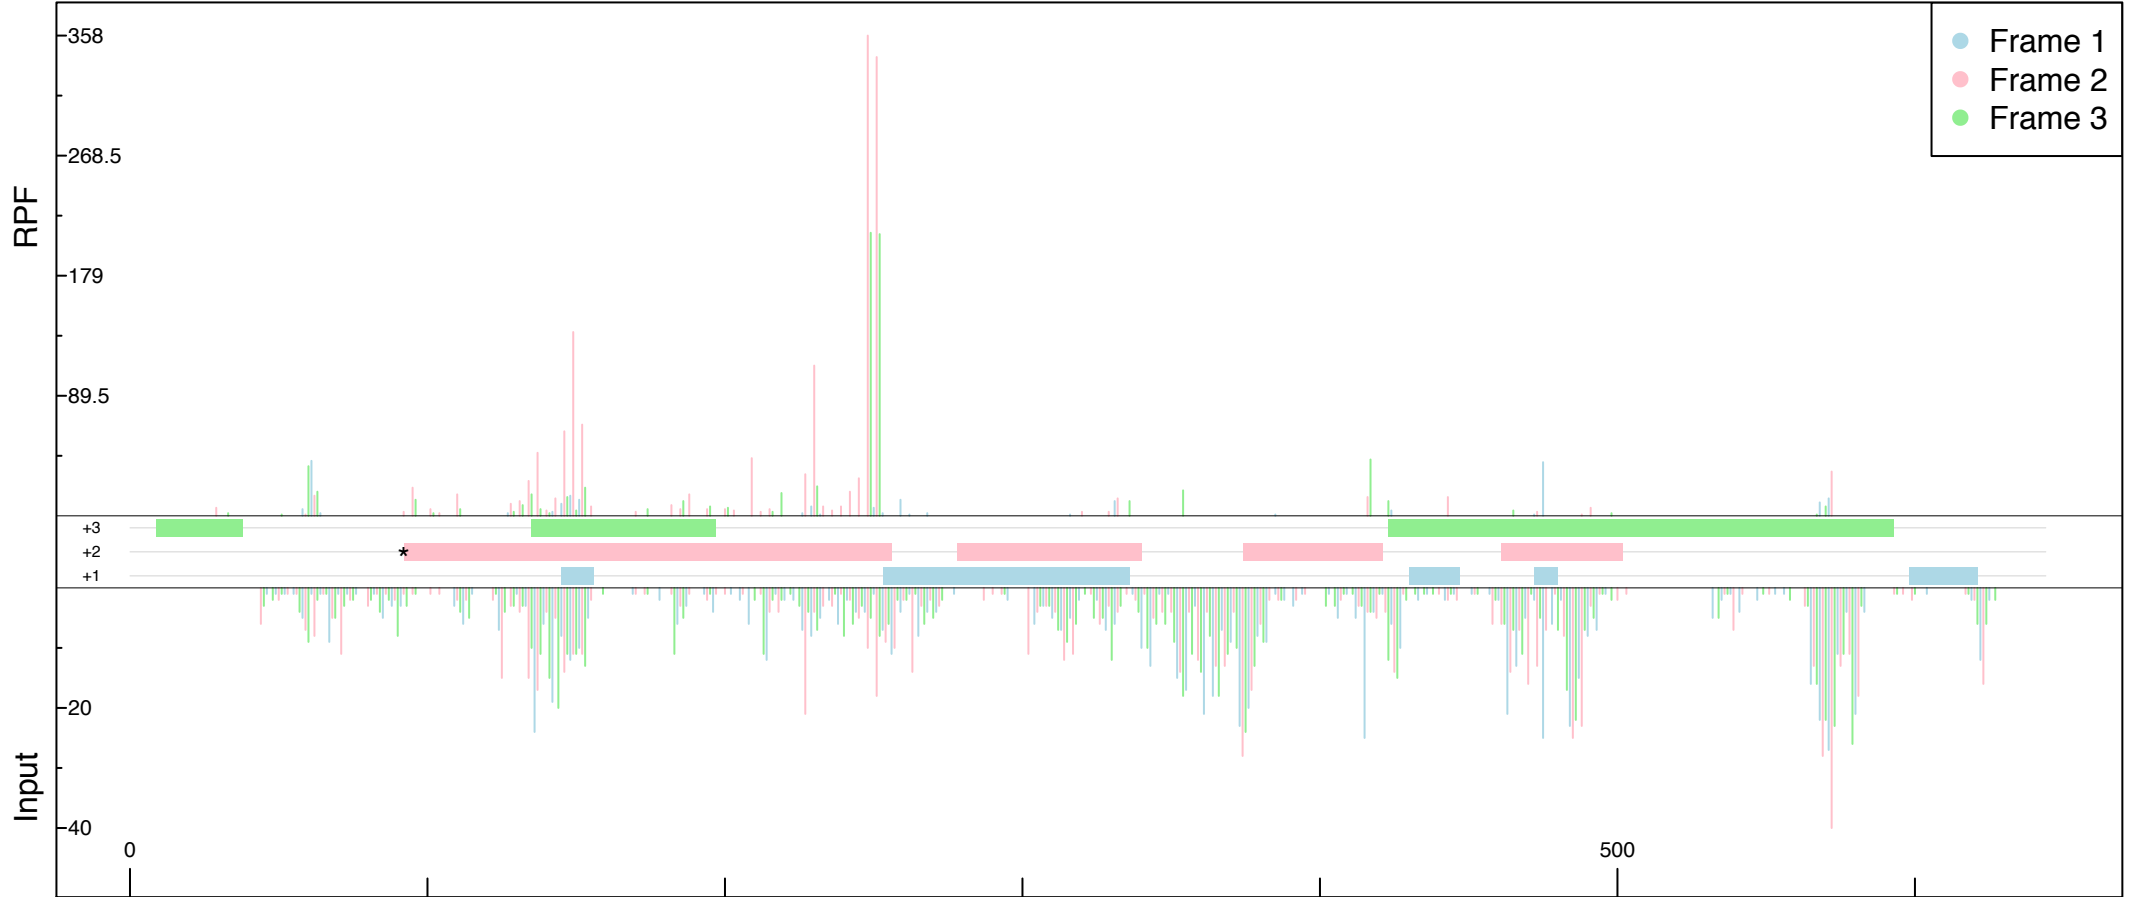

\*MAESSIFTRCLRVNYGQRCANDCPDVLYNTAEQSLRKVSSFMHLPTCAIMKVTL

linc-zgc:171223, Global

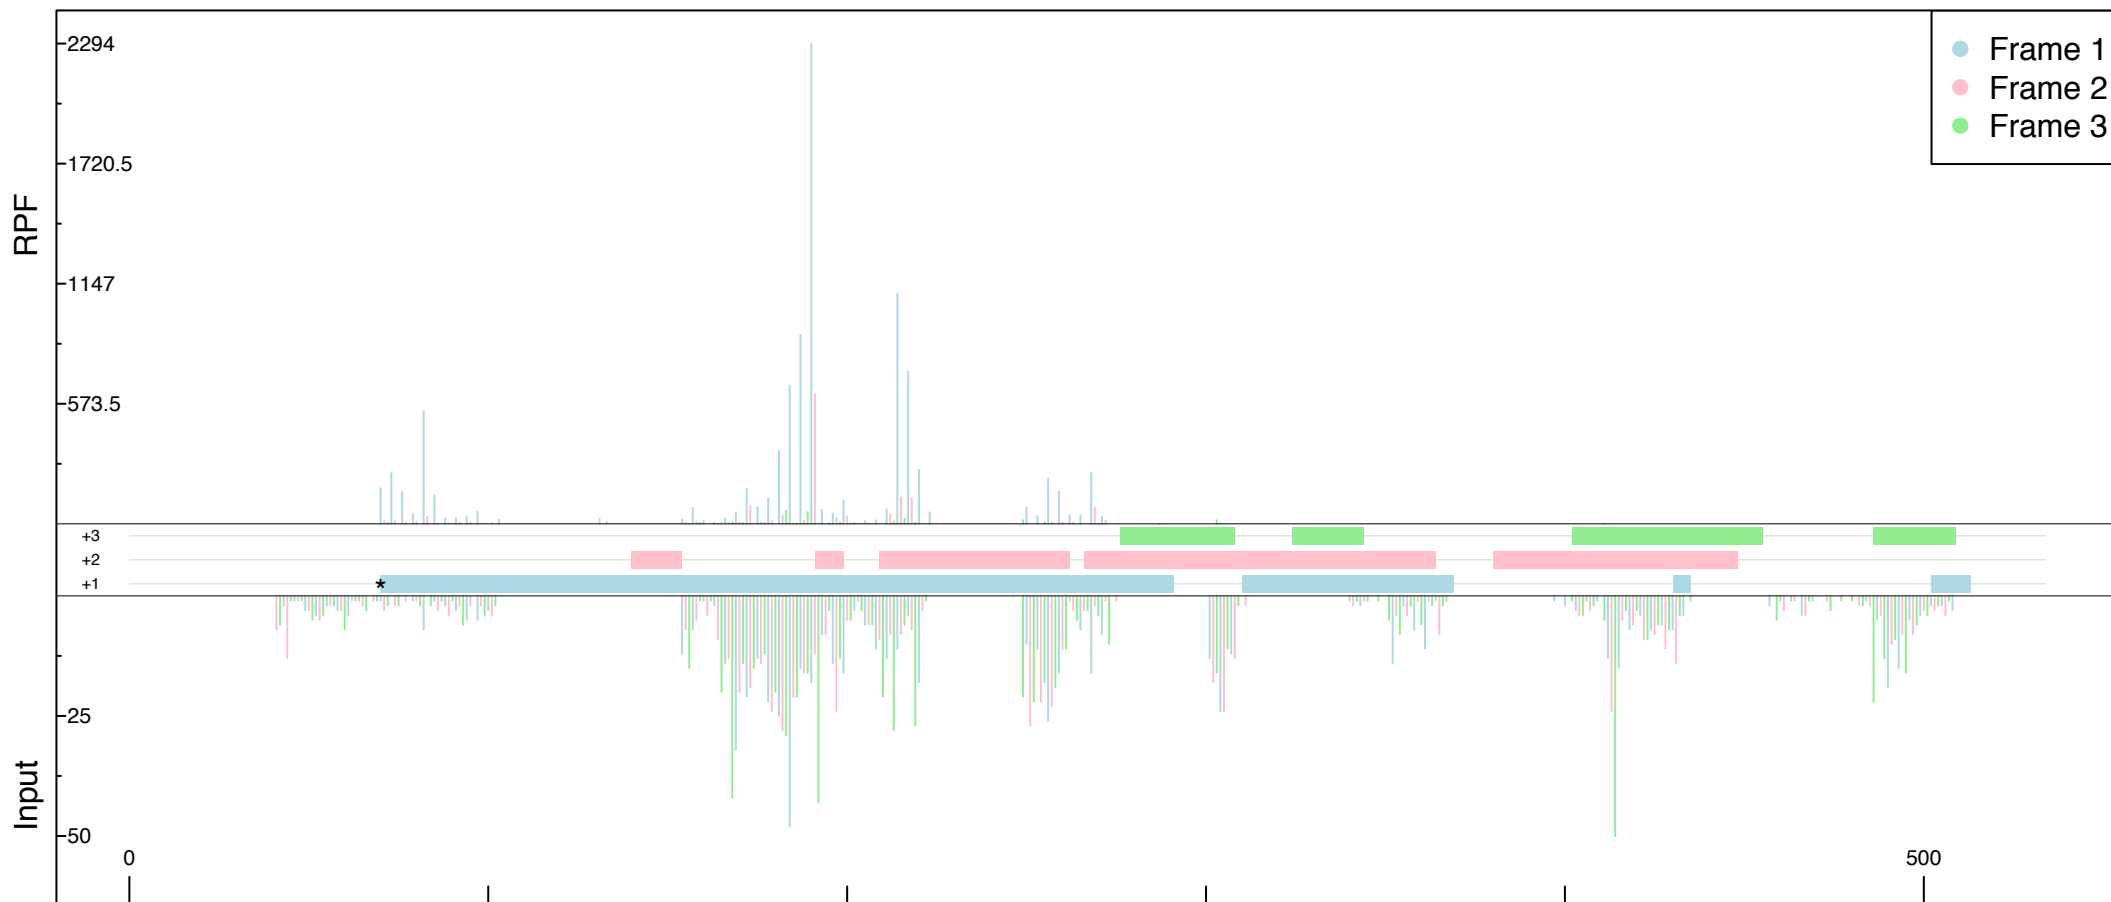

\*MKLAILVCVSVFYLTMVEAEATDESPIVCTREYKPVCGDDGITYSNECMLRWESNAKEVNVNKHEGKCESS

linc-abhd6a\_2, Global

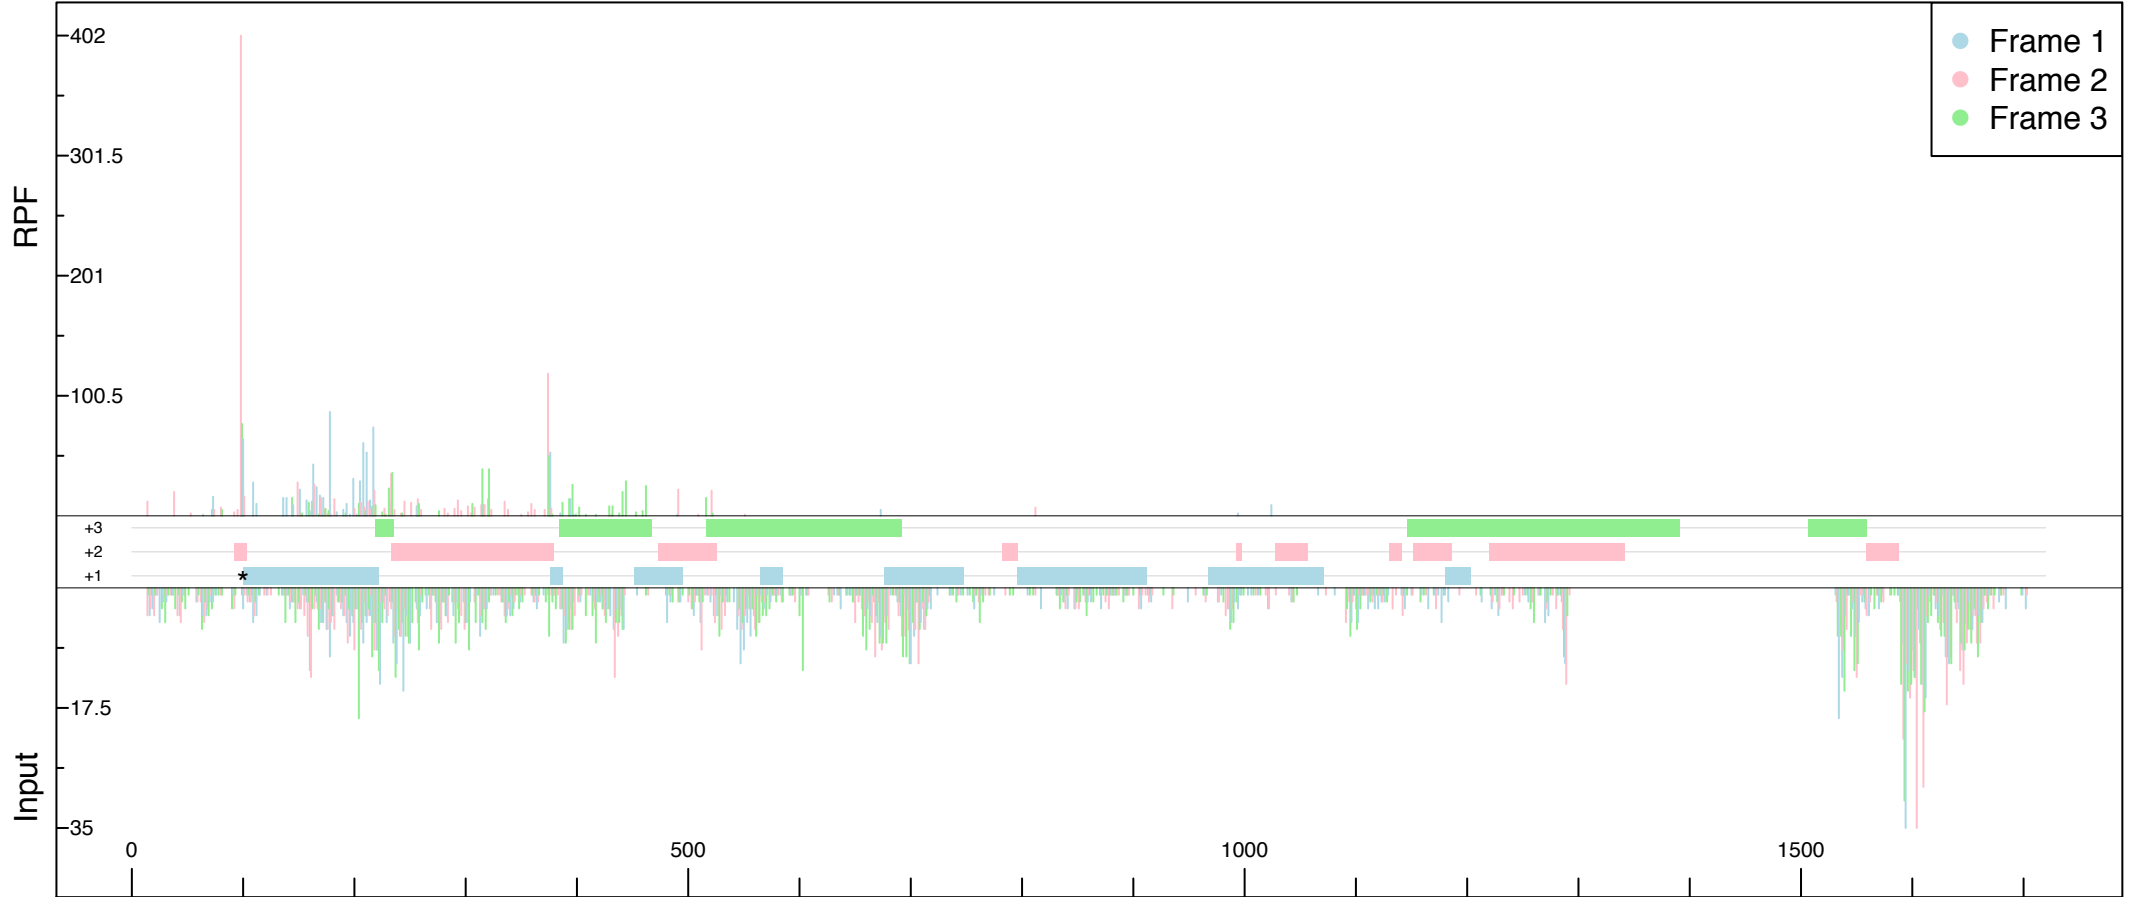

\*MTISSPQQLFWLQSSSKLEKESRDAPLDMLRLSSFCPERR

linc-abhd6a\_3, Global

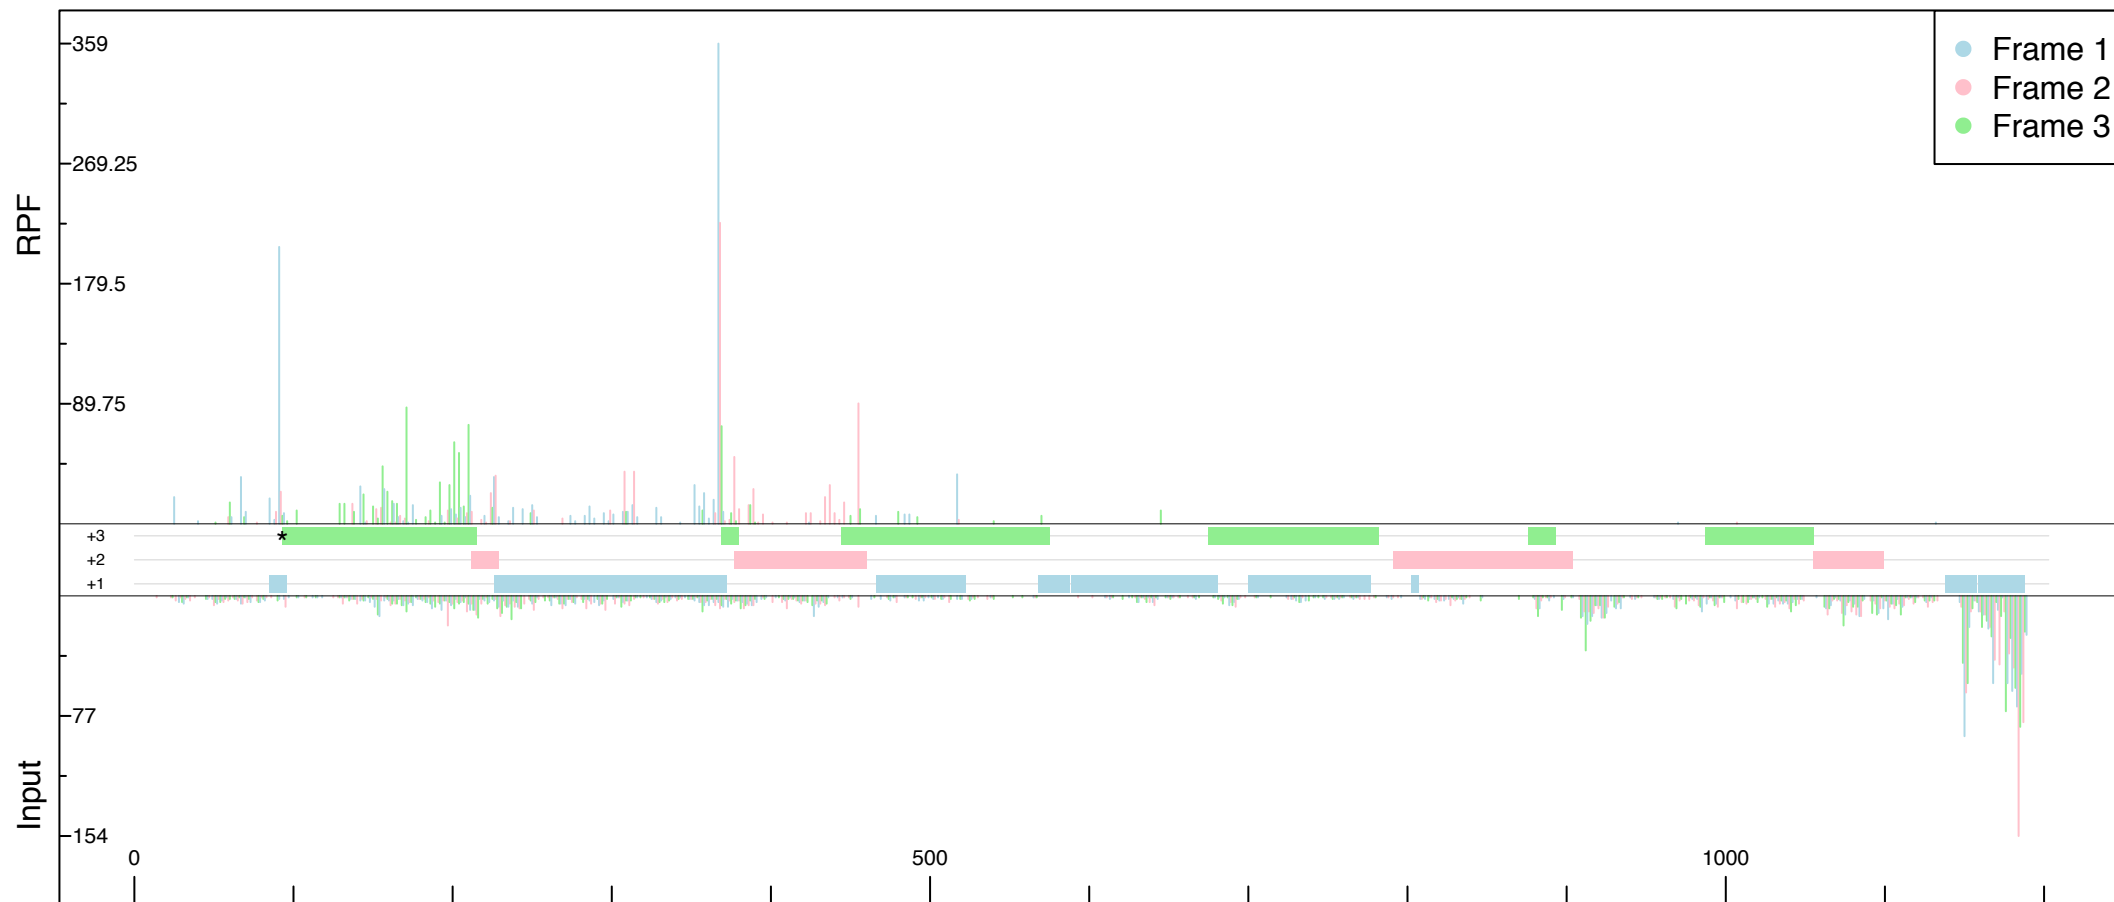

\*MMISSPQQLFWLQSSSKLEKESRDAPLDMLRLSSFCPERR



ENSDART00000138573, Global

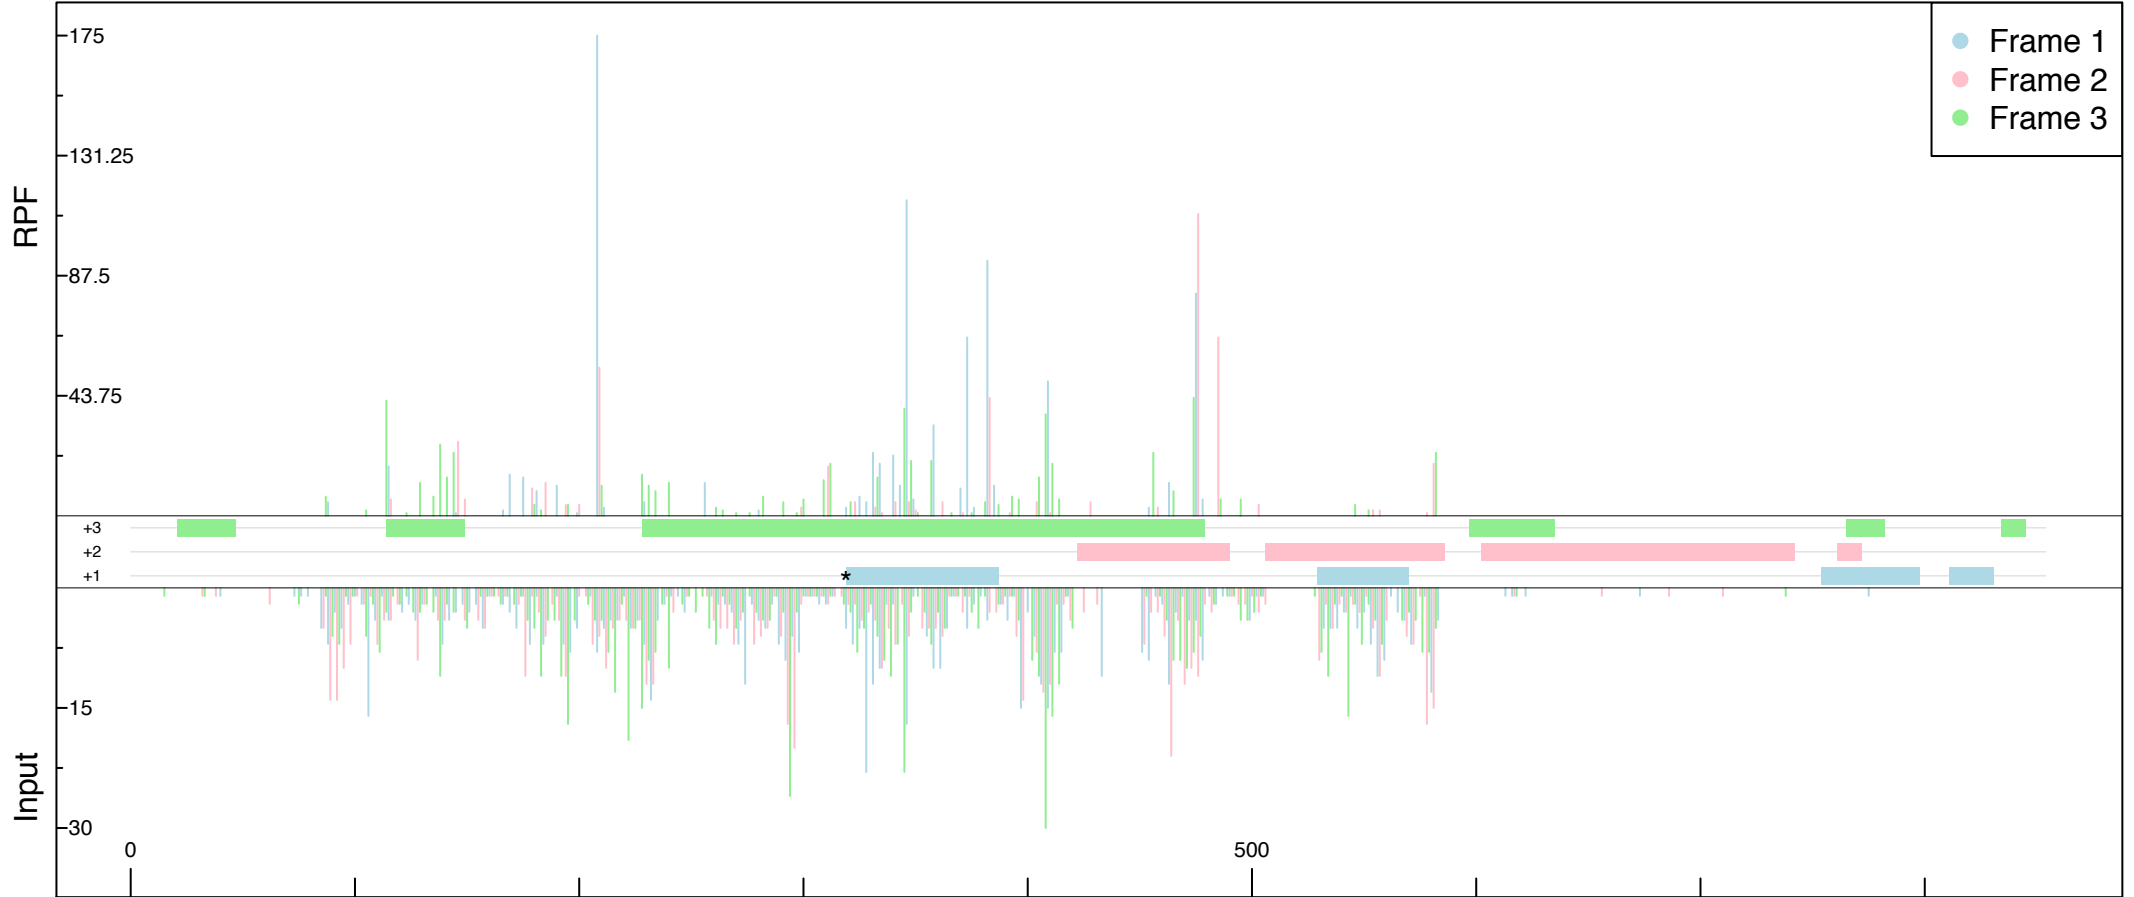

\*MMA PVW TYRCPRLQVSIKTVYI

ENSDART00000134250, Global

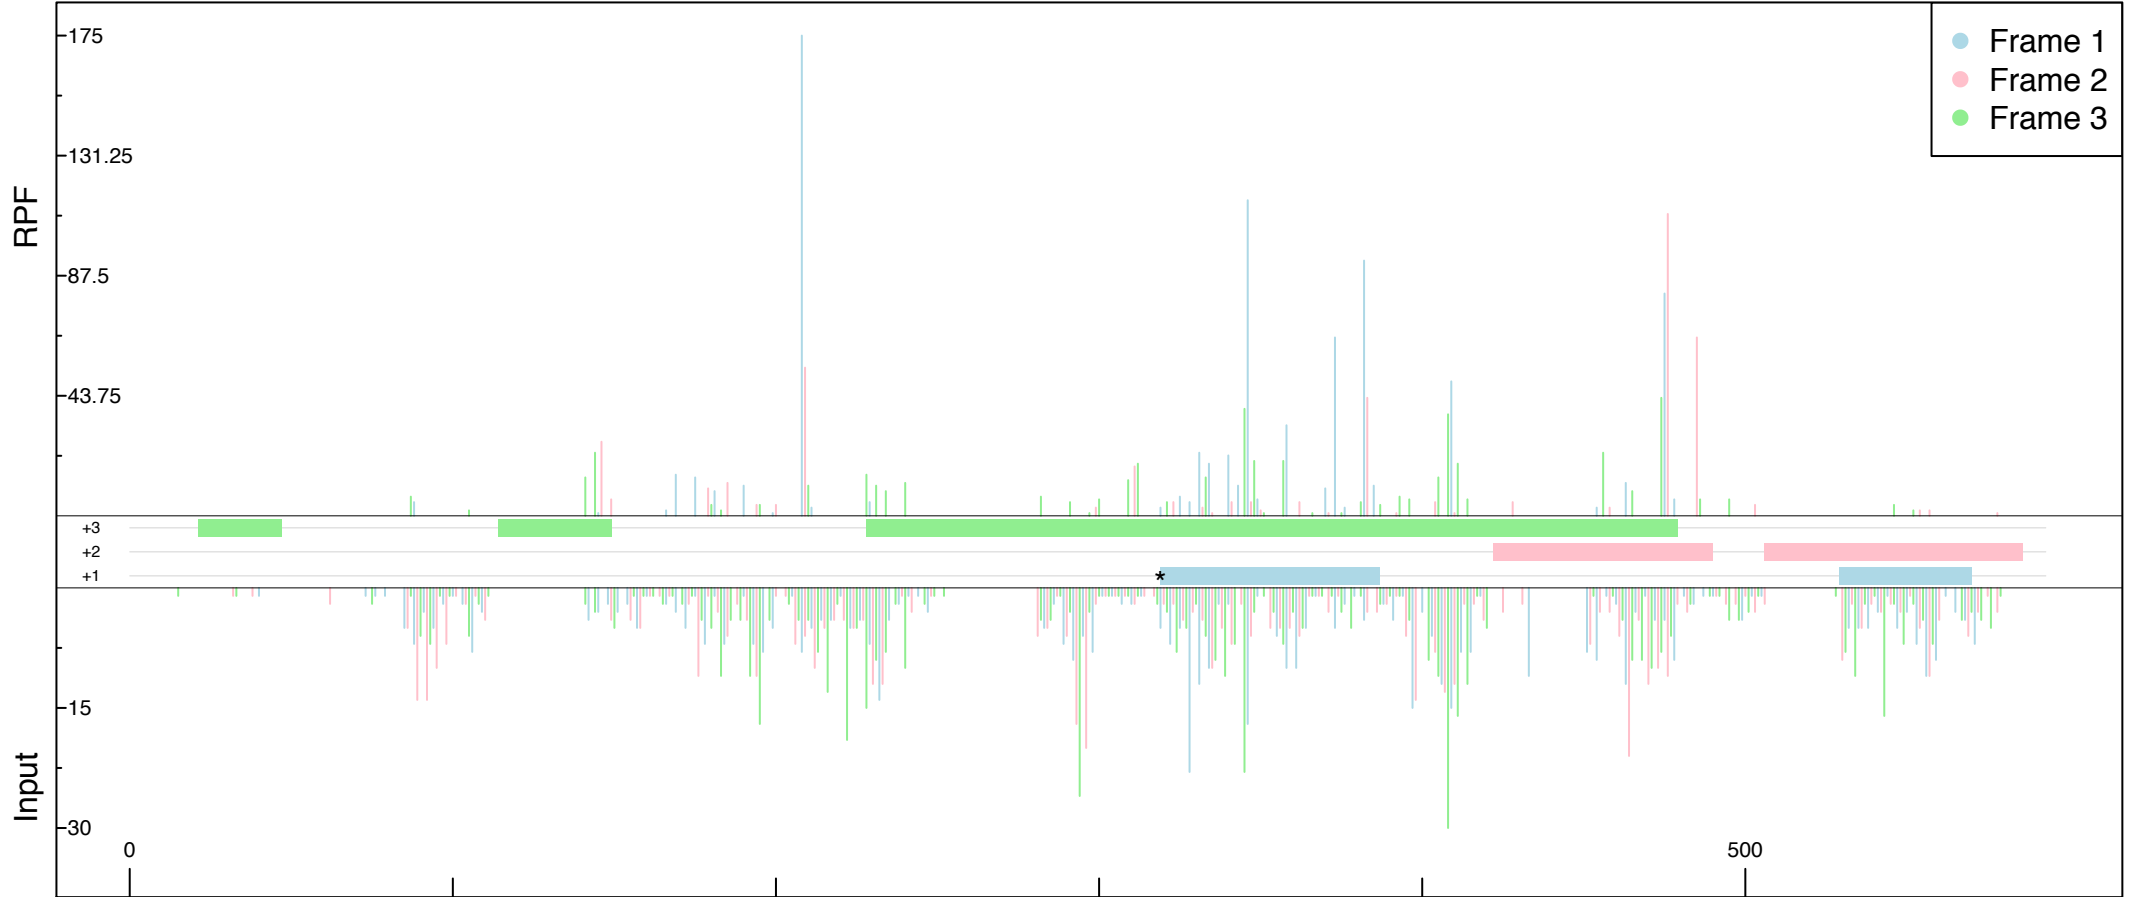

\*MMAPVWTYRCPR LQVSIKTVYI

ENSDART00000133657, Global

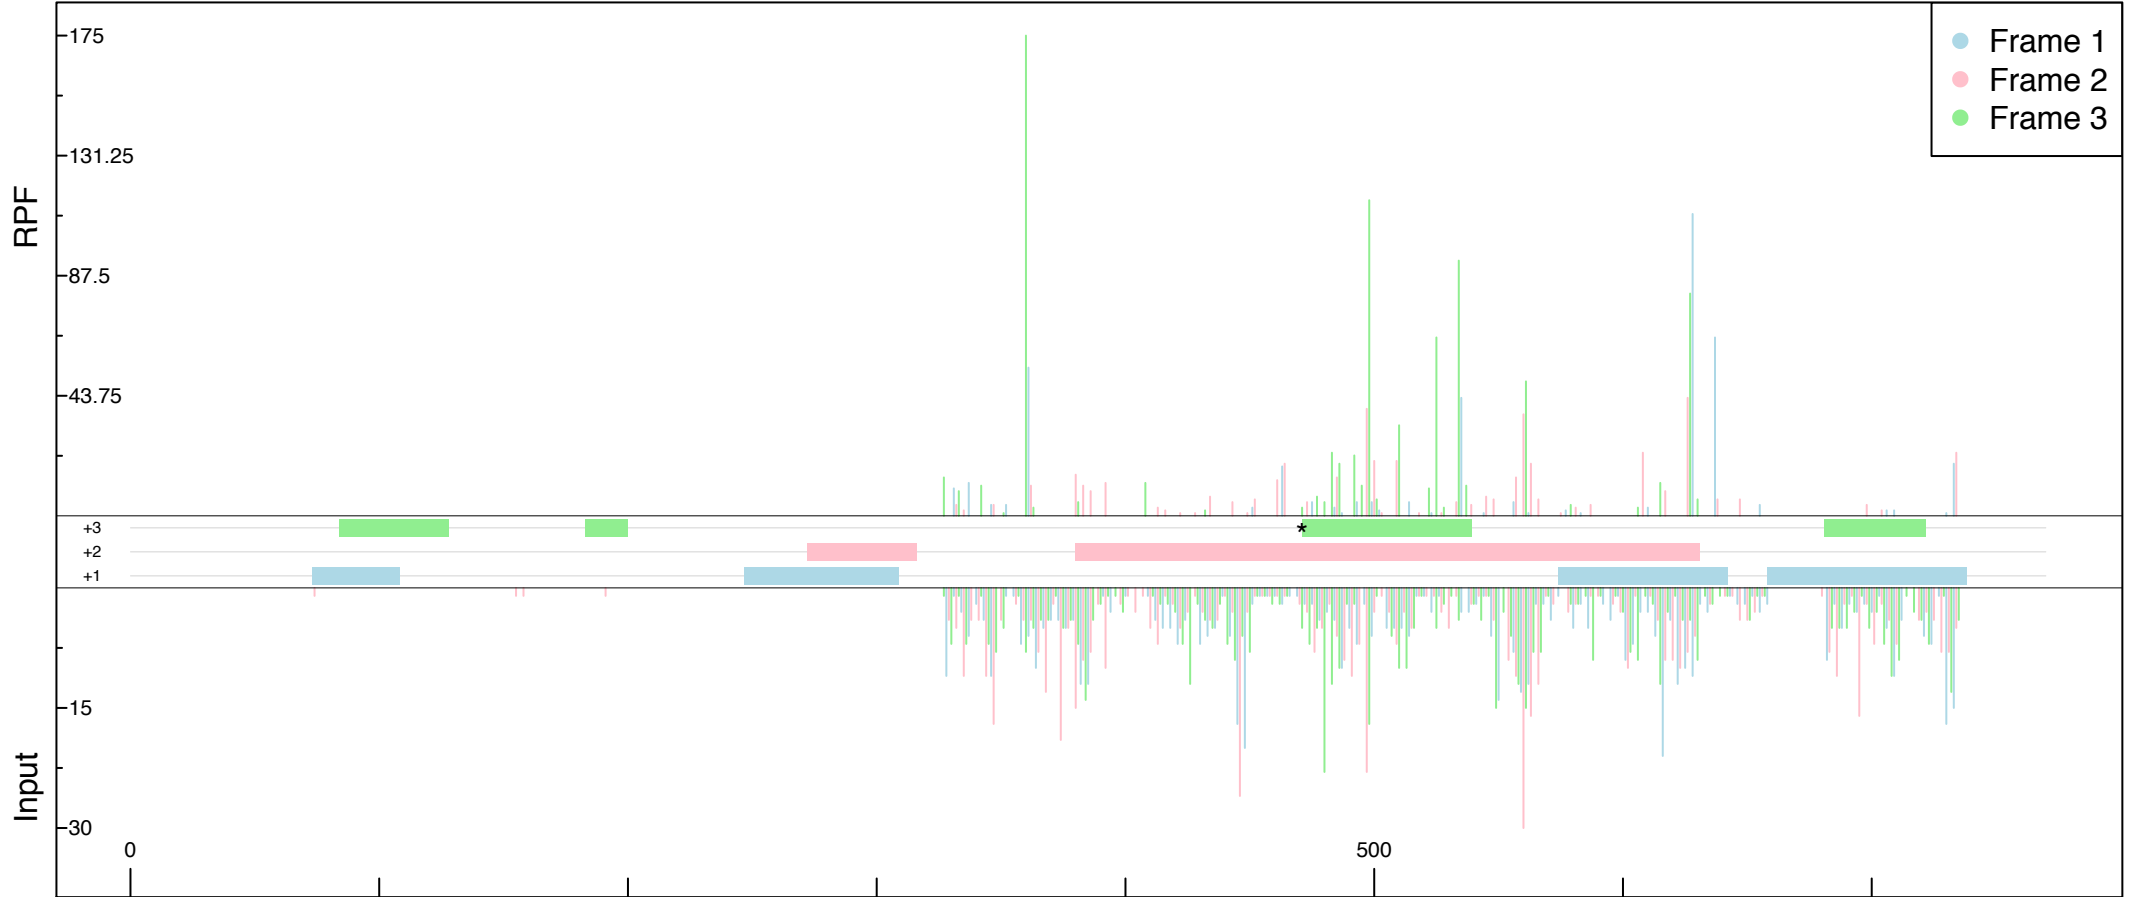

\*MMAPVWTYRCPLQVSIKTVYI

ENSDART00000134225, Global

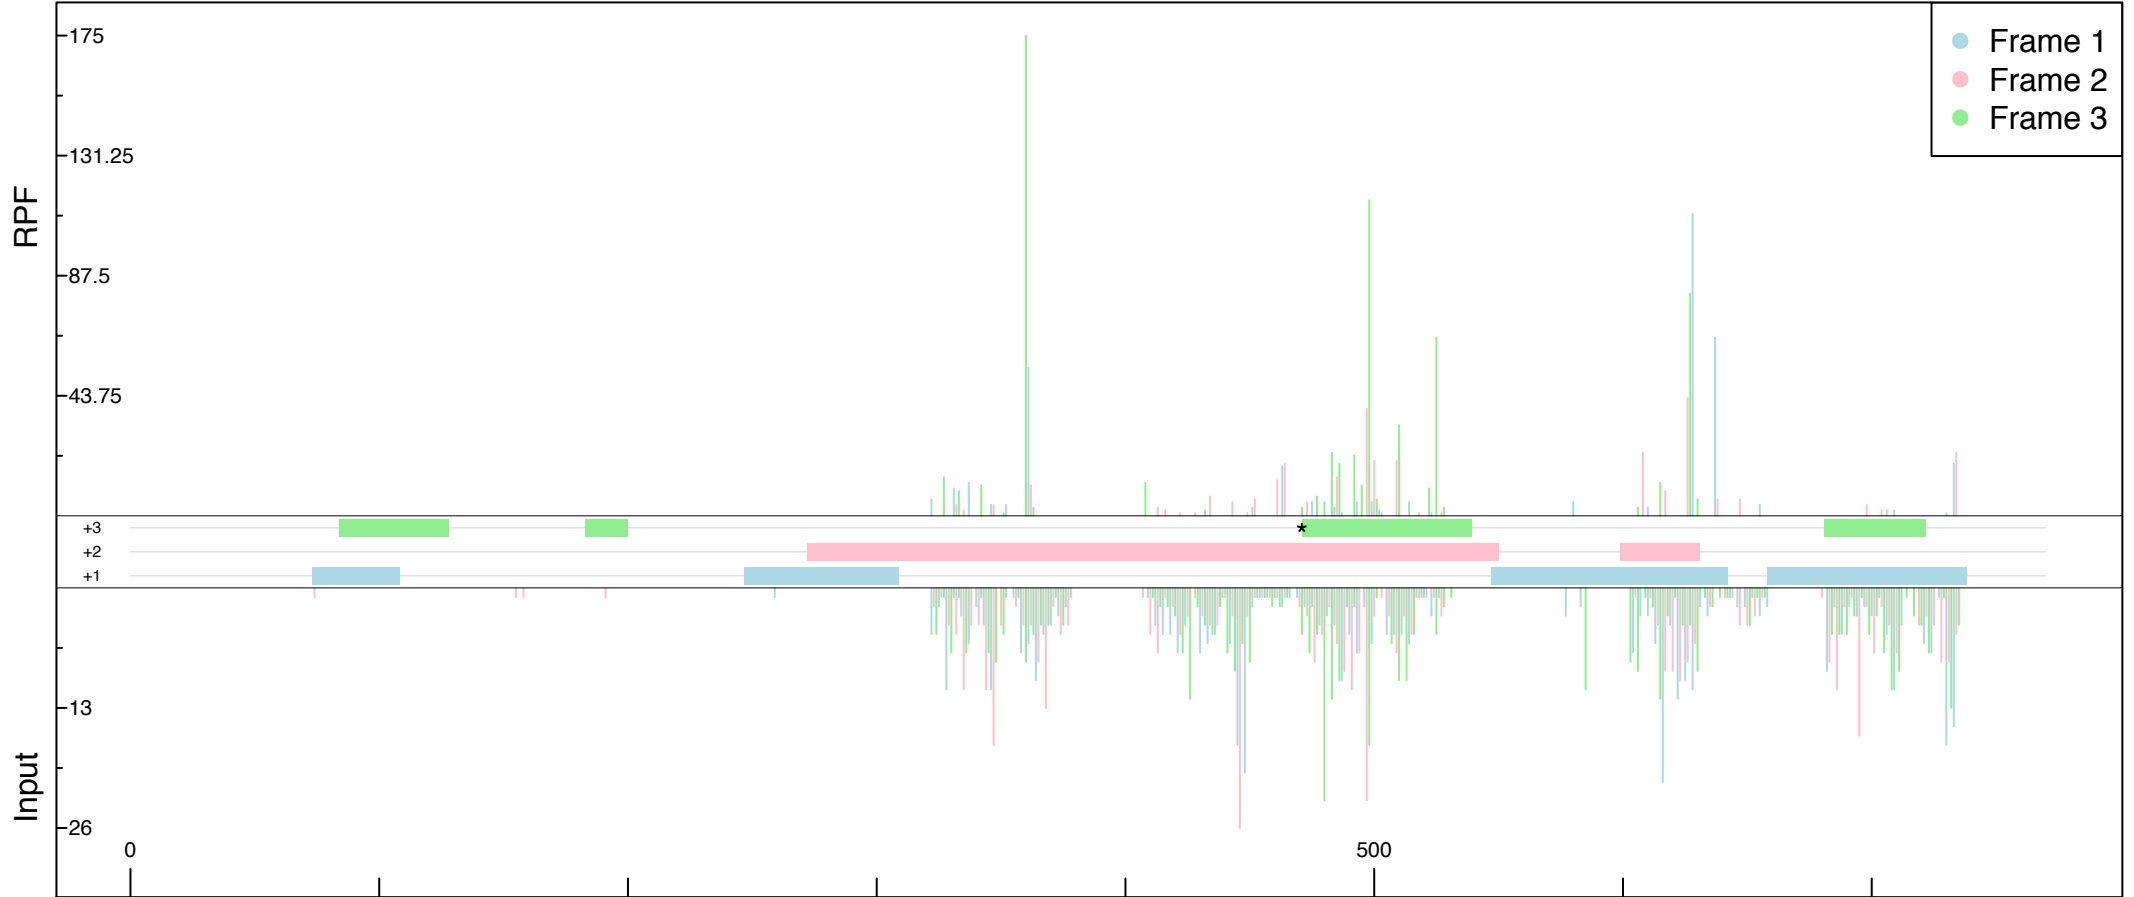

\*MMAPVWTYRCPLQVSIKTVYI

ENSDART00000149172, Global

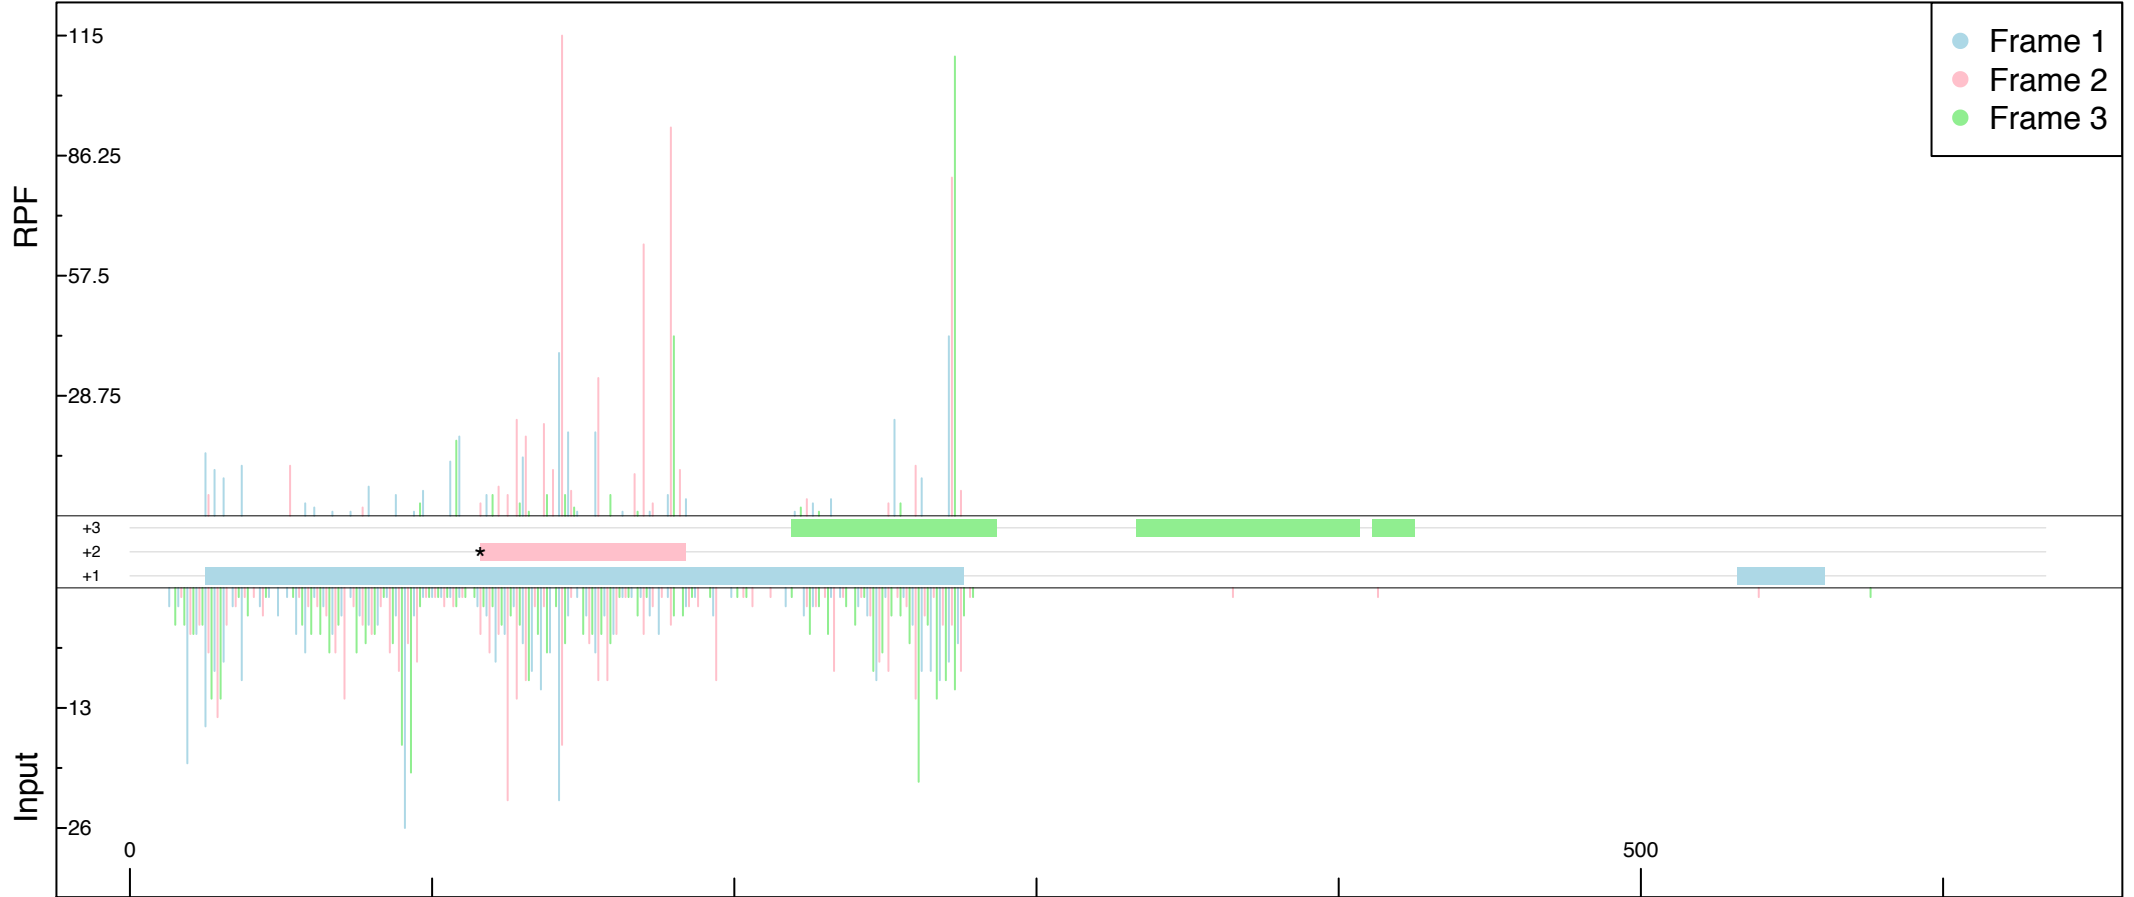

\*MMA PVW TYRCPRLQVSIKTVYI

ENSDART00000132053, Global

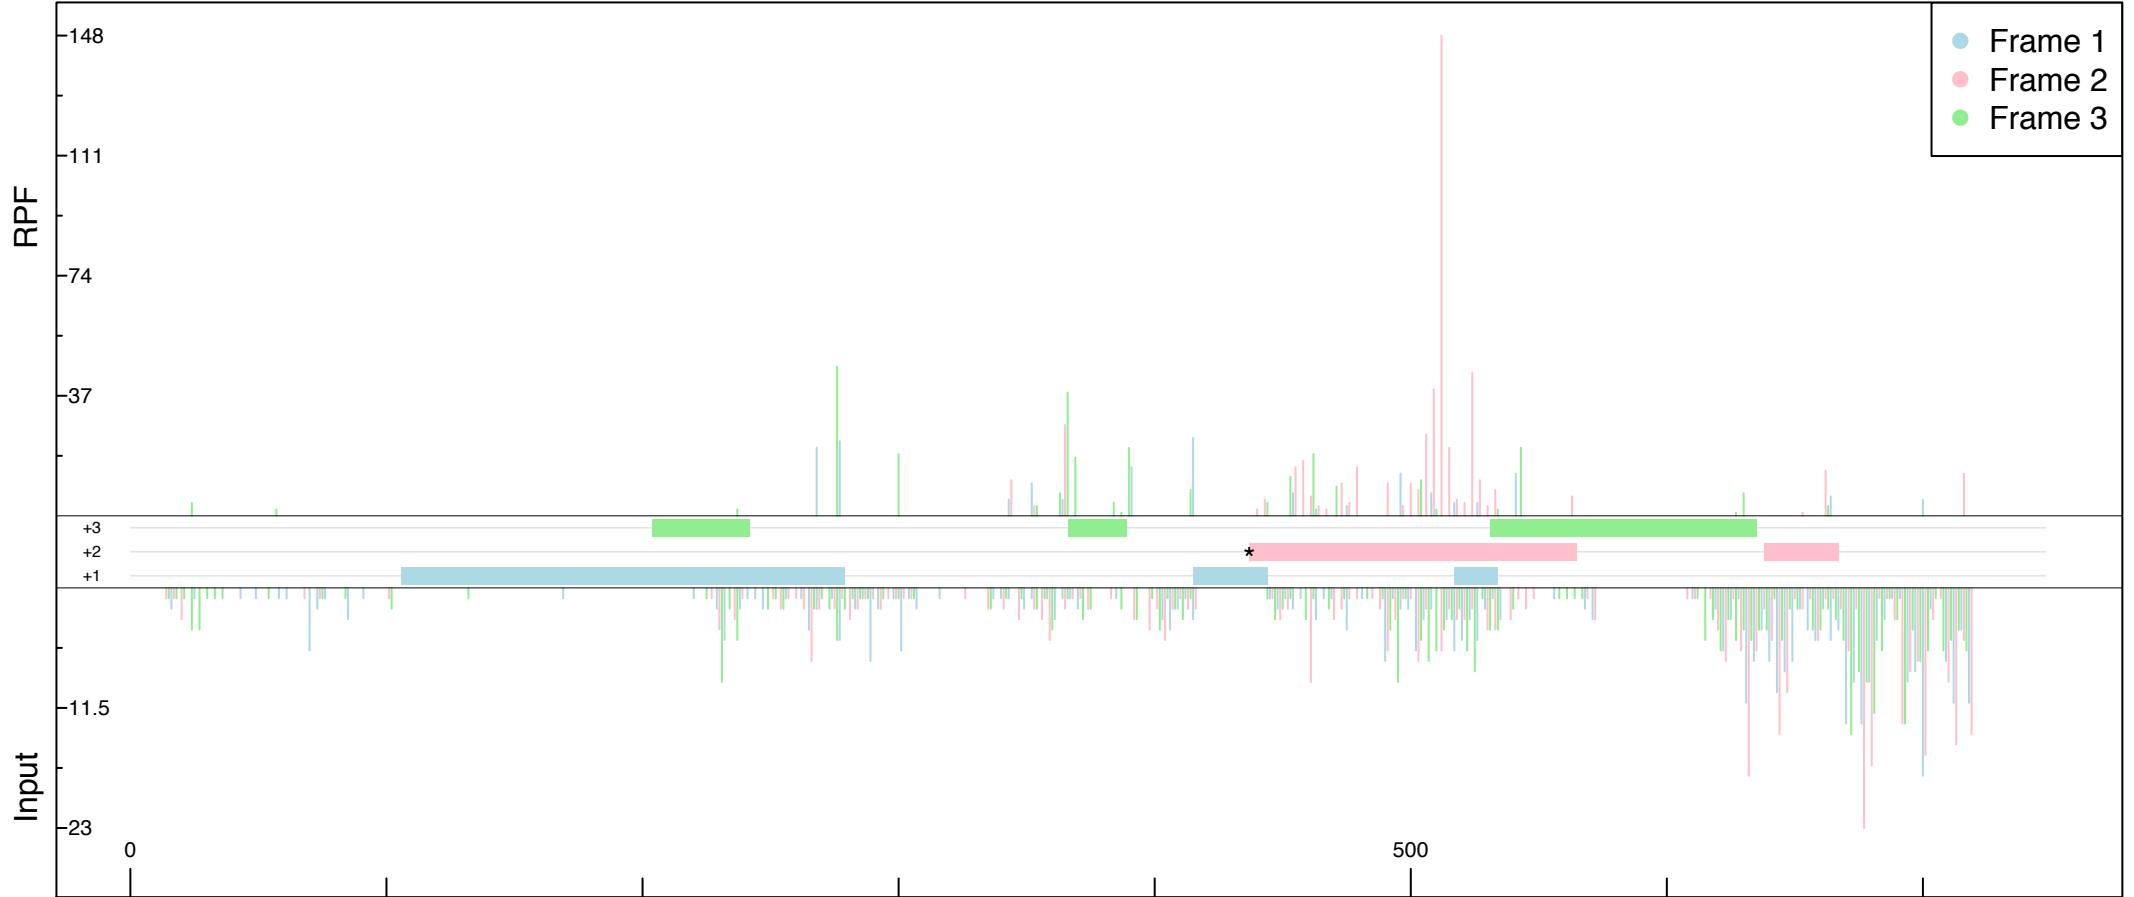

\*MPDCSSTPNSVGPADQCLQYYHKLLGRCVDSYEPNLGRLVFR

ENSDART00000139311, Global

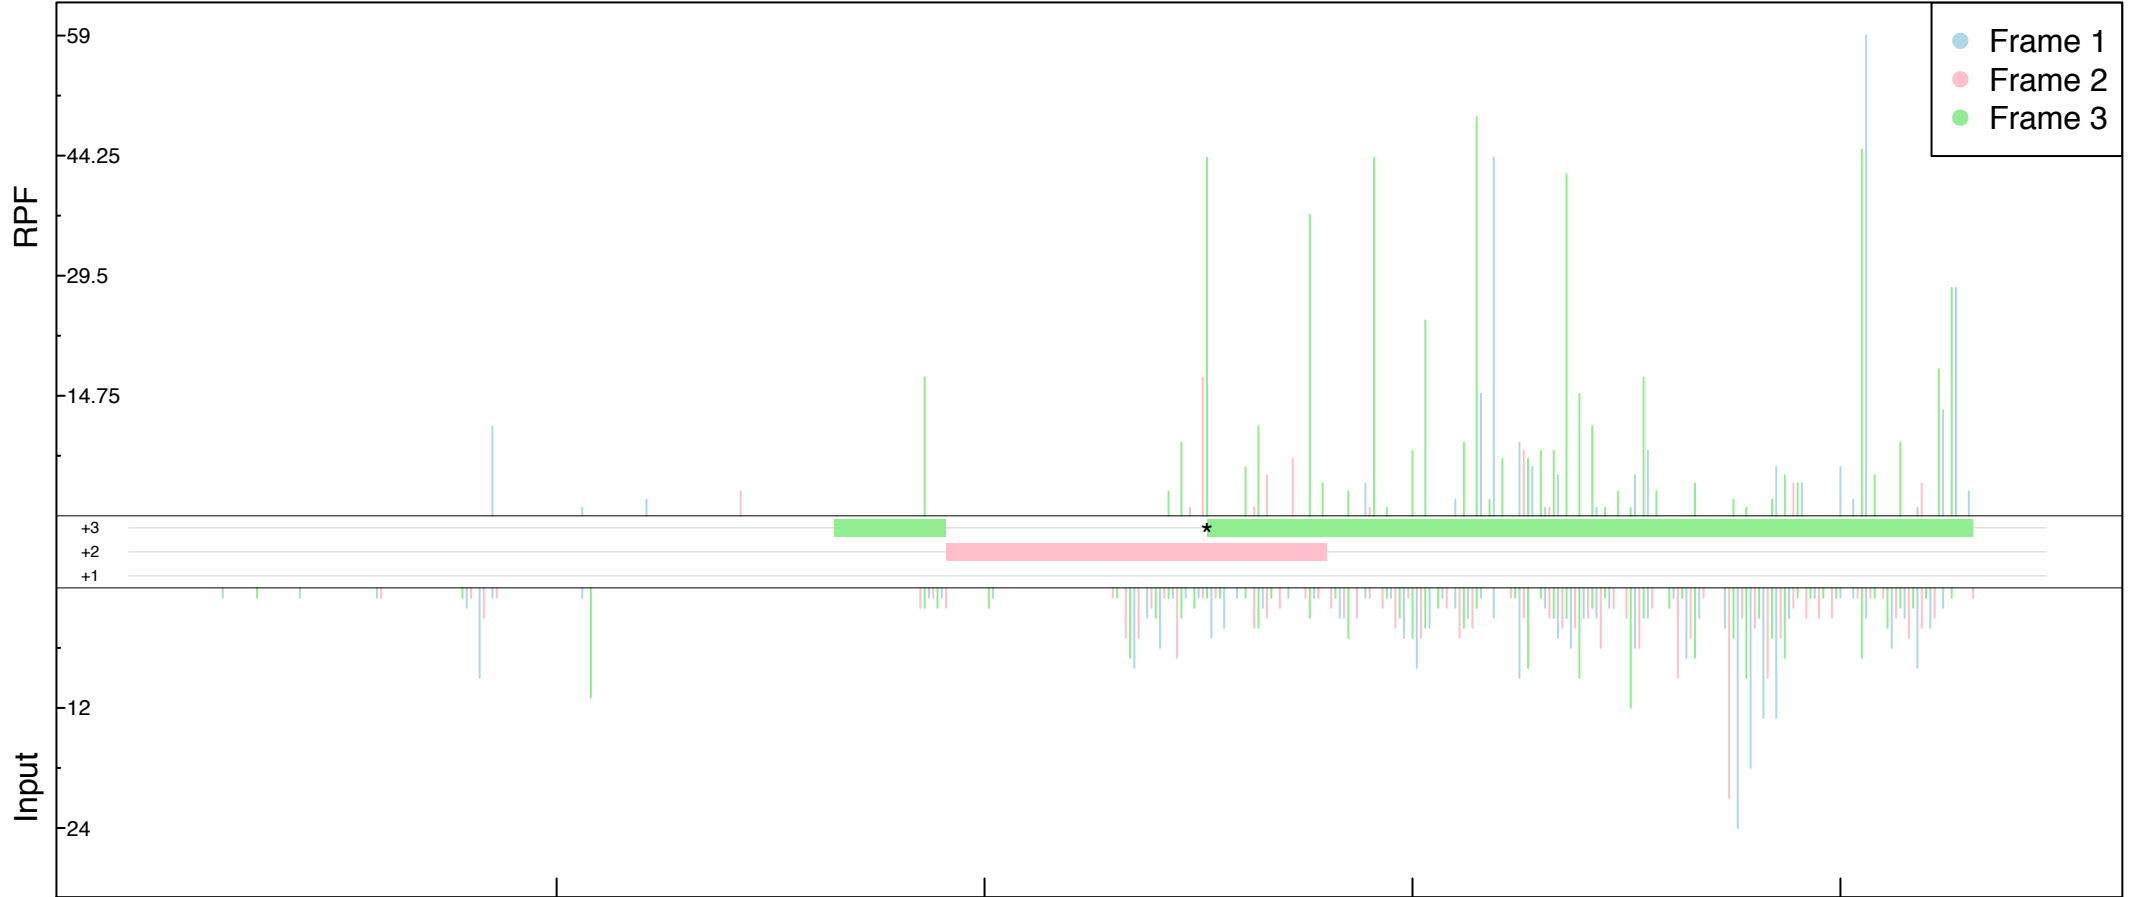

\*MGPHLDFTTDFGSLKLYAEDAFCTLEFKGRVADTICLSVLETRGEAVFKRMGLLYHM

linc-zgc:77147, Global

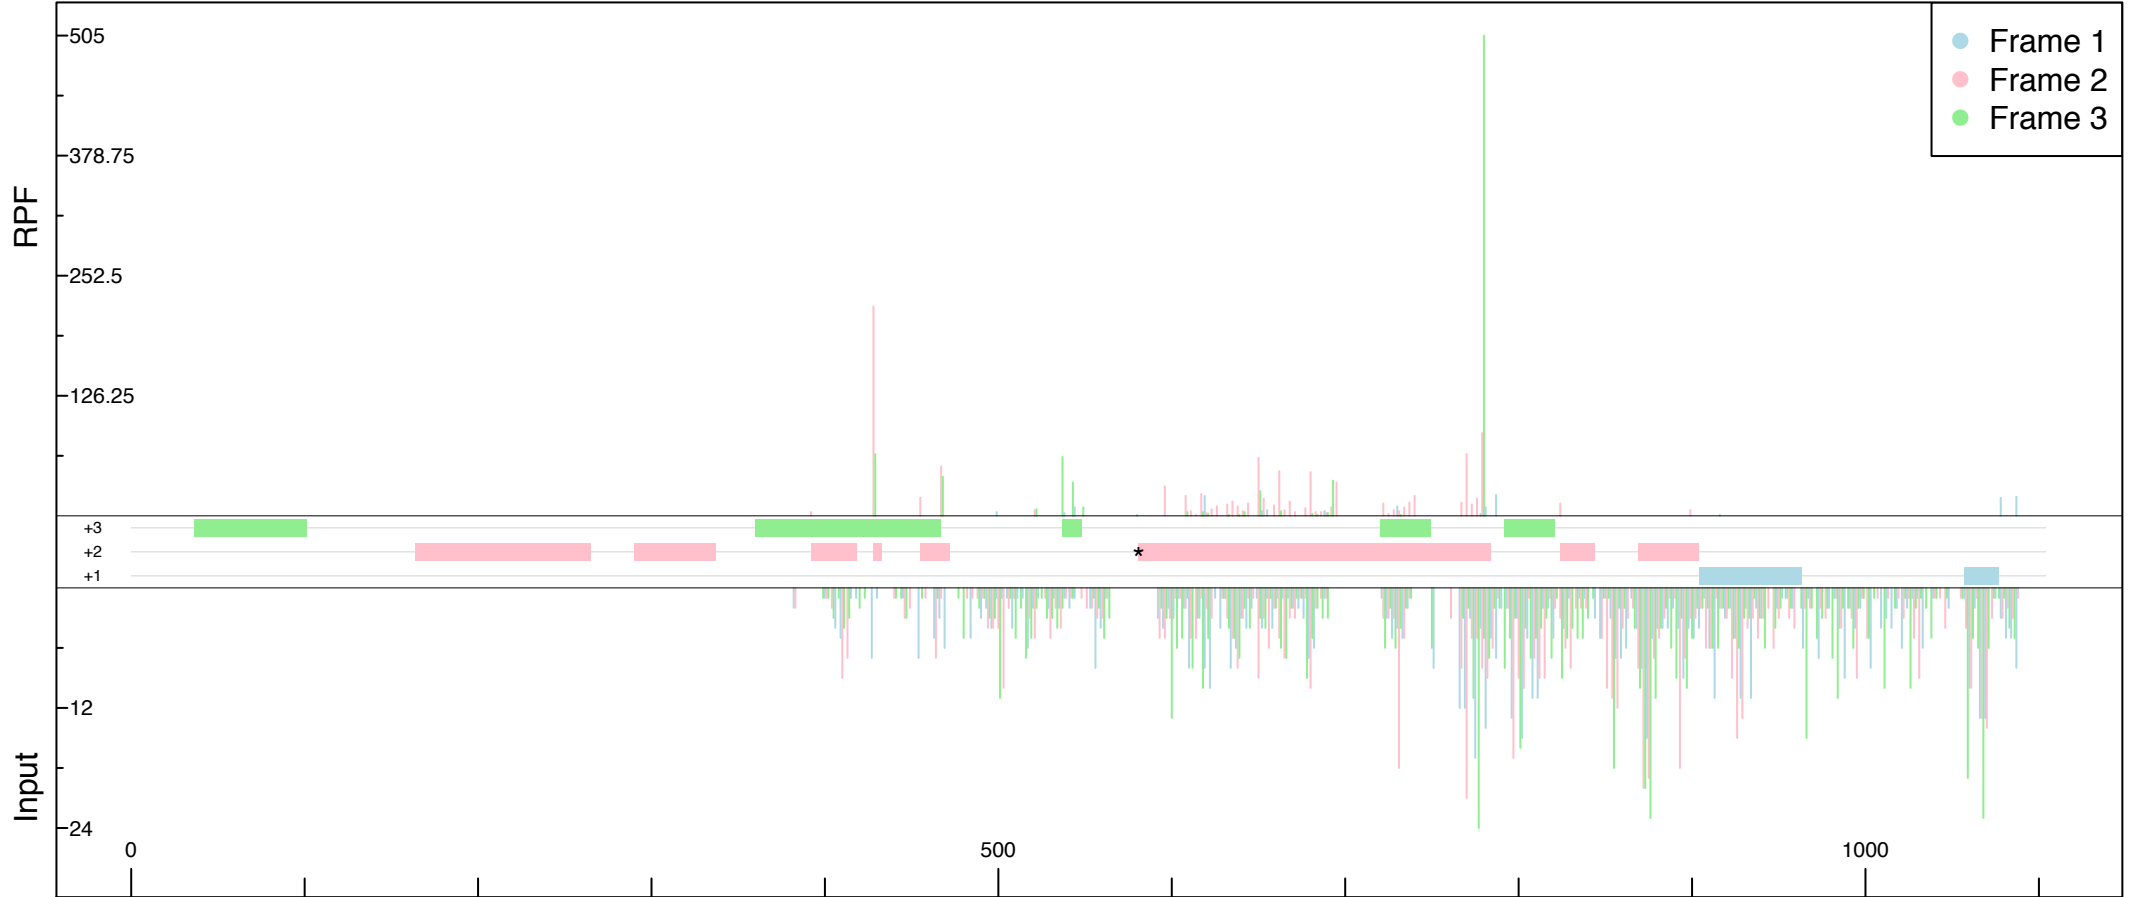

\*MVCELLSSVWFLFVIFWLETISVWLFLCLYQDRVFYHWGSGGFADDPDQFLYVLSRIDLSTHMQT



ENSDART00000143992, Global

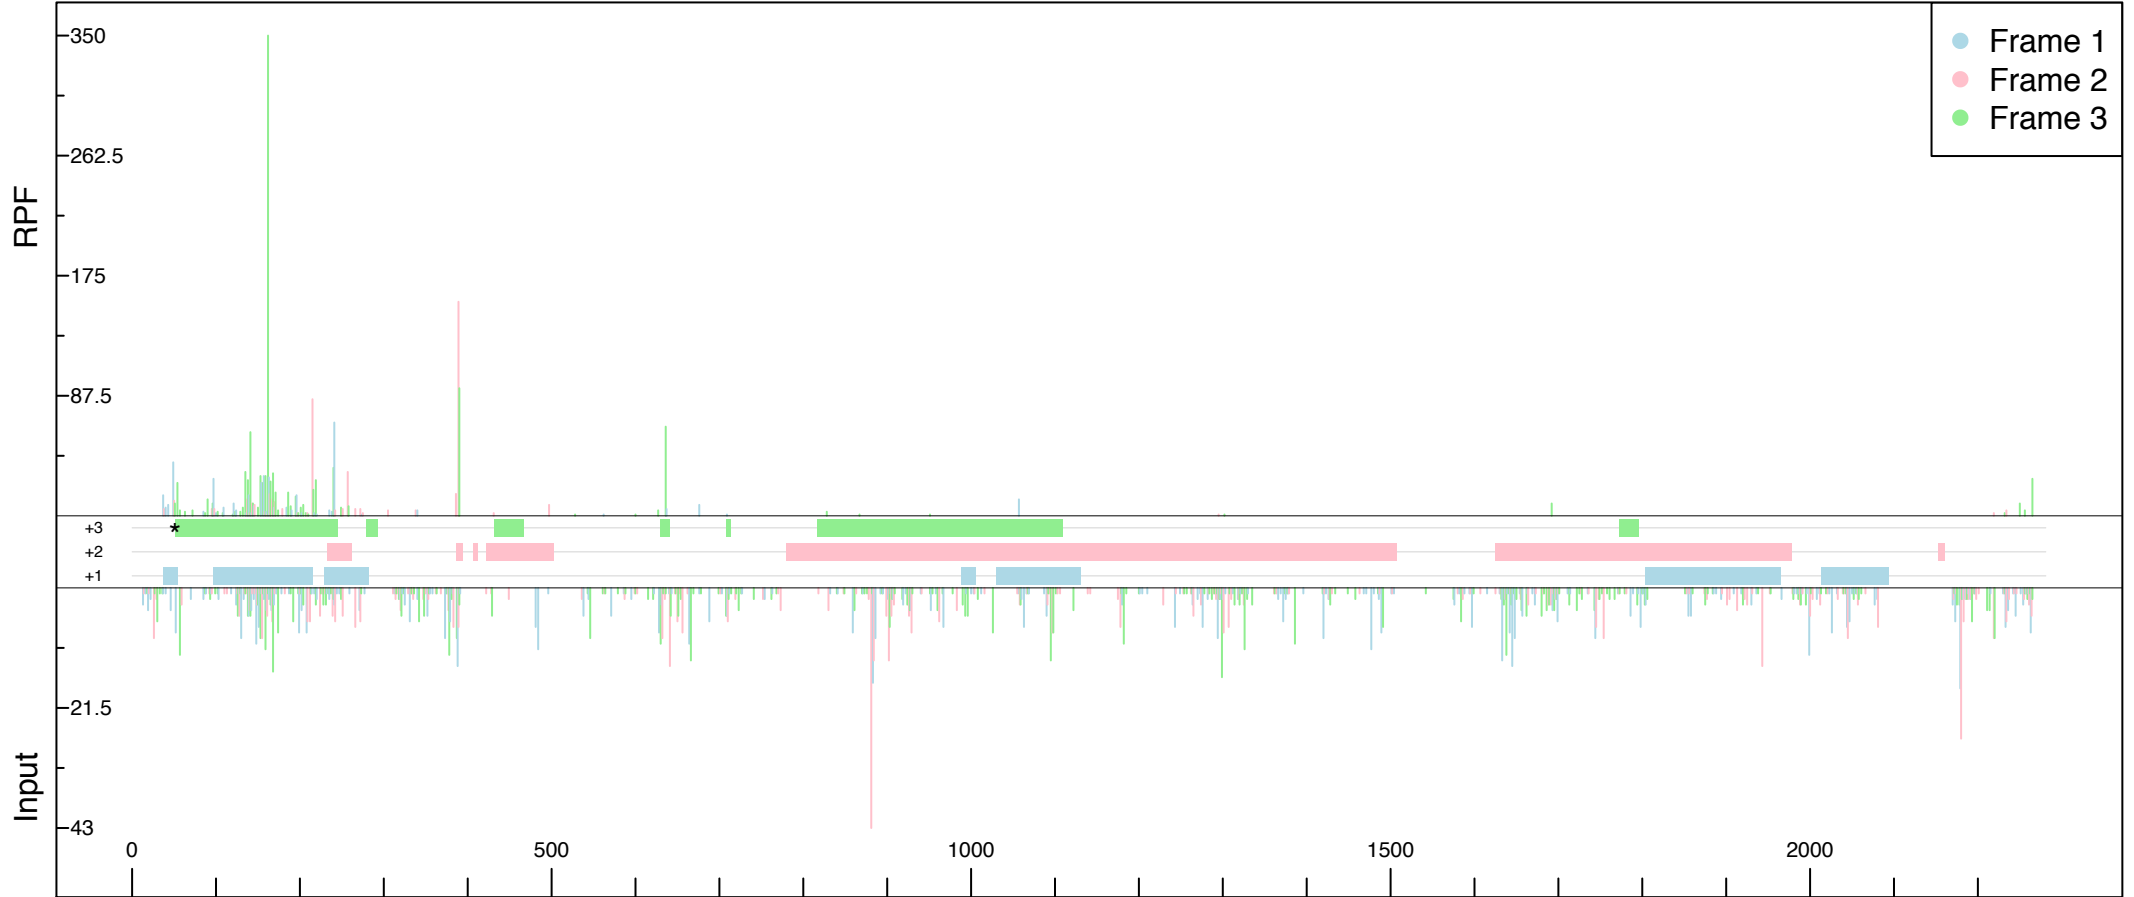

\*MKITVQIANVHKAFPNVDTQVYSSTSKVPYLAETVDHPEHHQWKKGVNASSKPLSEG VHG CWA

ENSDART00000146995, Global

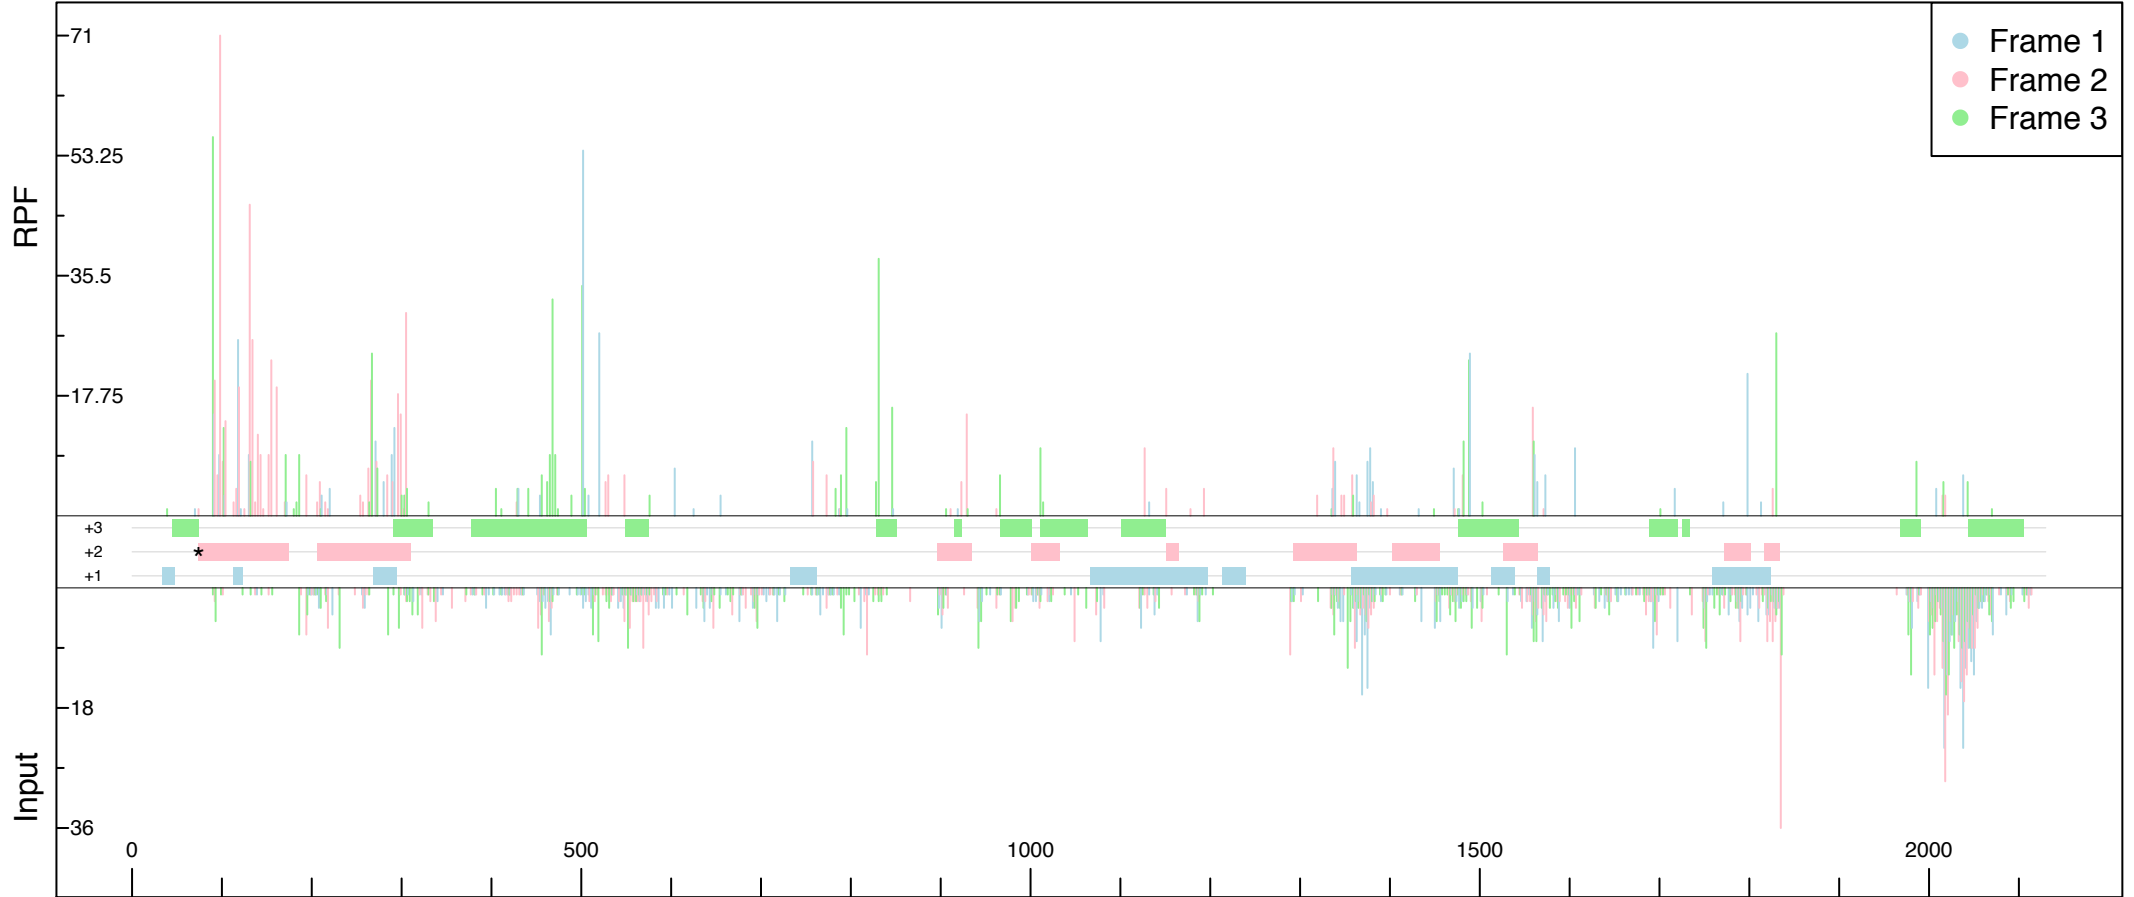

\*MTMDNCVKIKLKECNLEELIPTFEAQERTFPRF

# ENSDART00000142180, Global

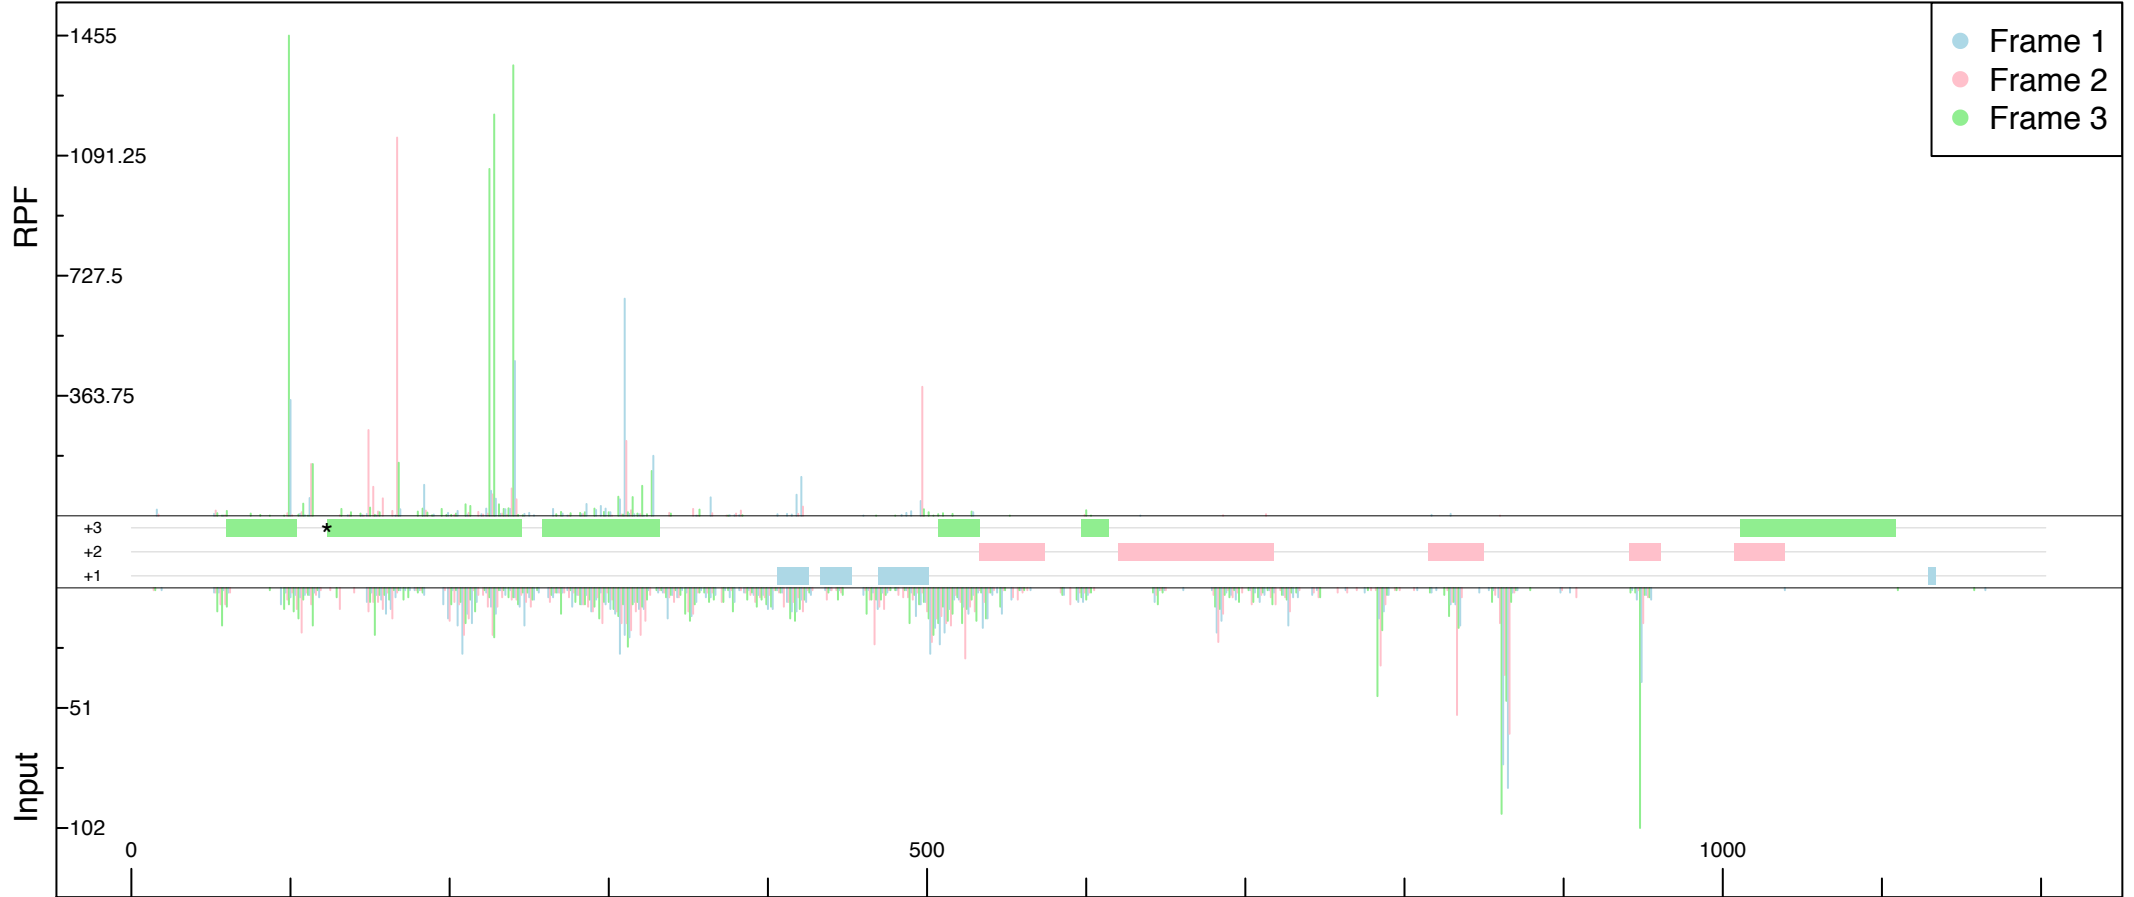

\*MRTMTVIHLKTEQGQYRHIYTMKKNYLEQRGWIKGSTTD

ENSDART00000139164, Global

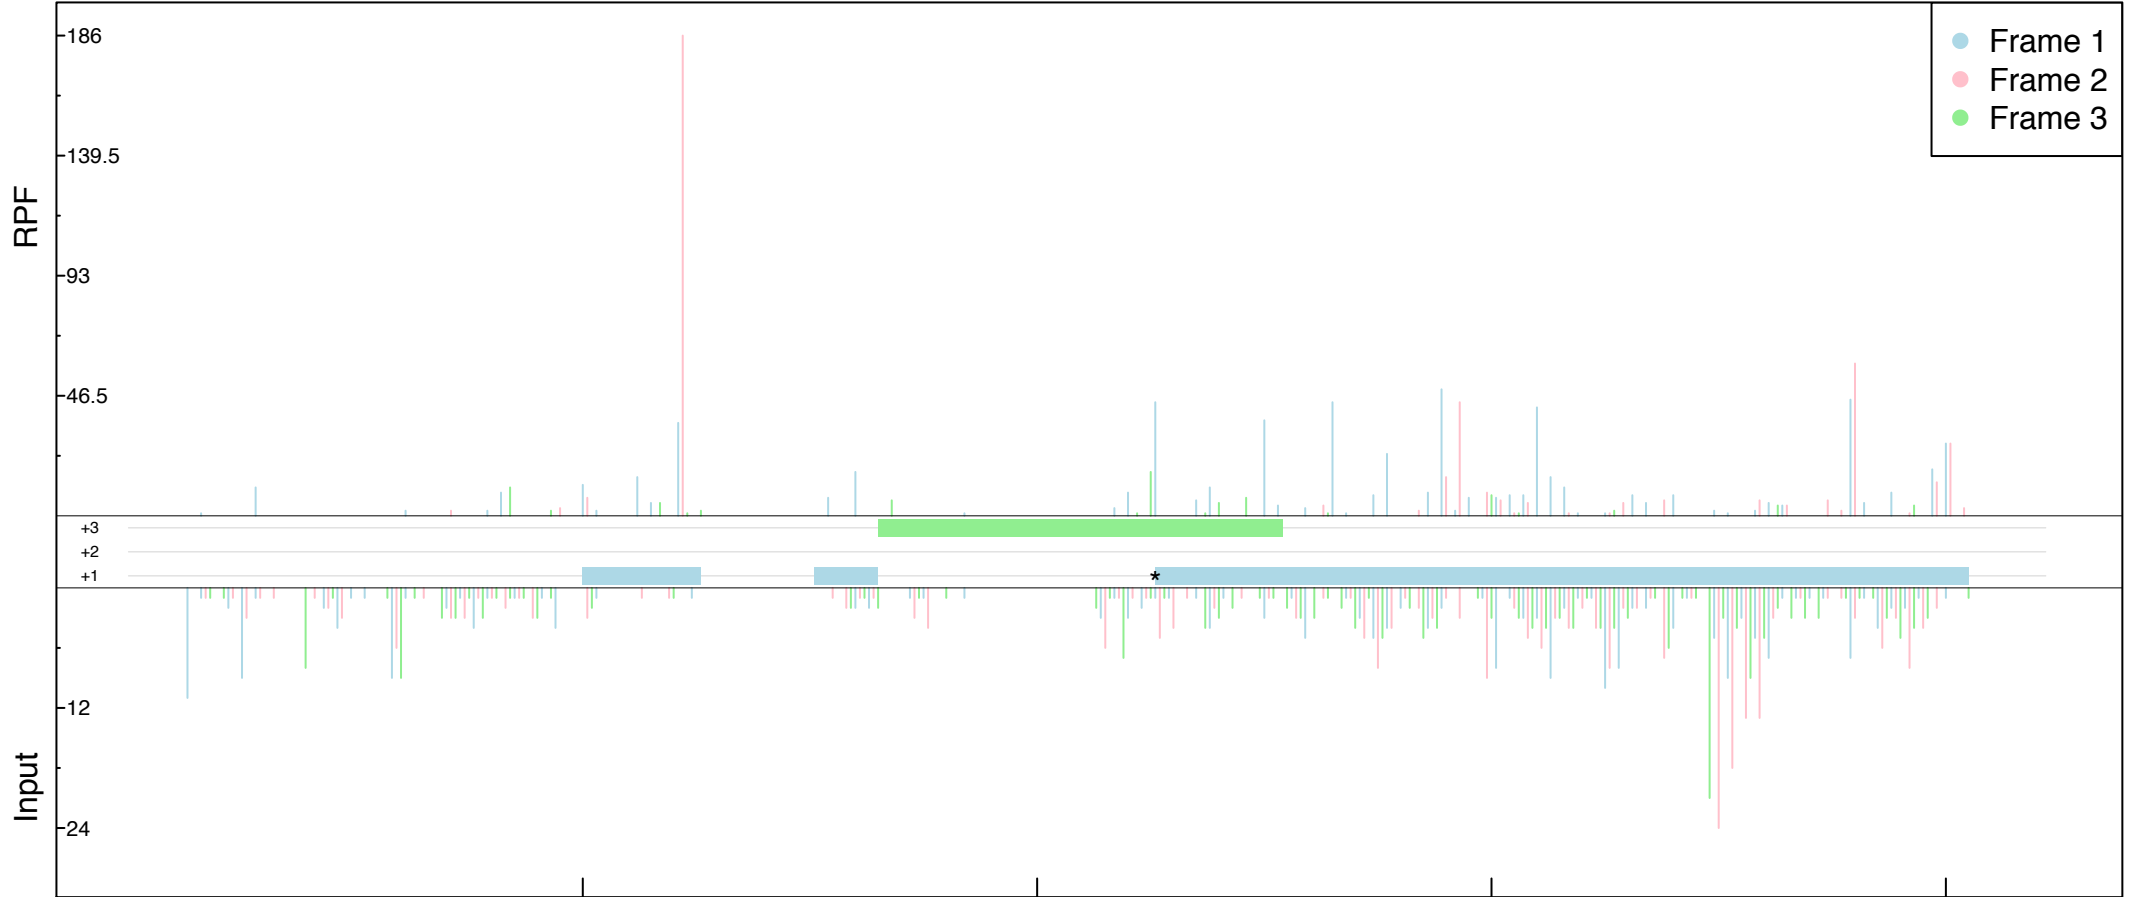

\*MGPHLDFTTDFGSLKLYAEDAFCTLEFKGRVADTNCLSVLETRGEAVFKRMGLLYHM

ENSDART00000152063, Global

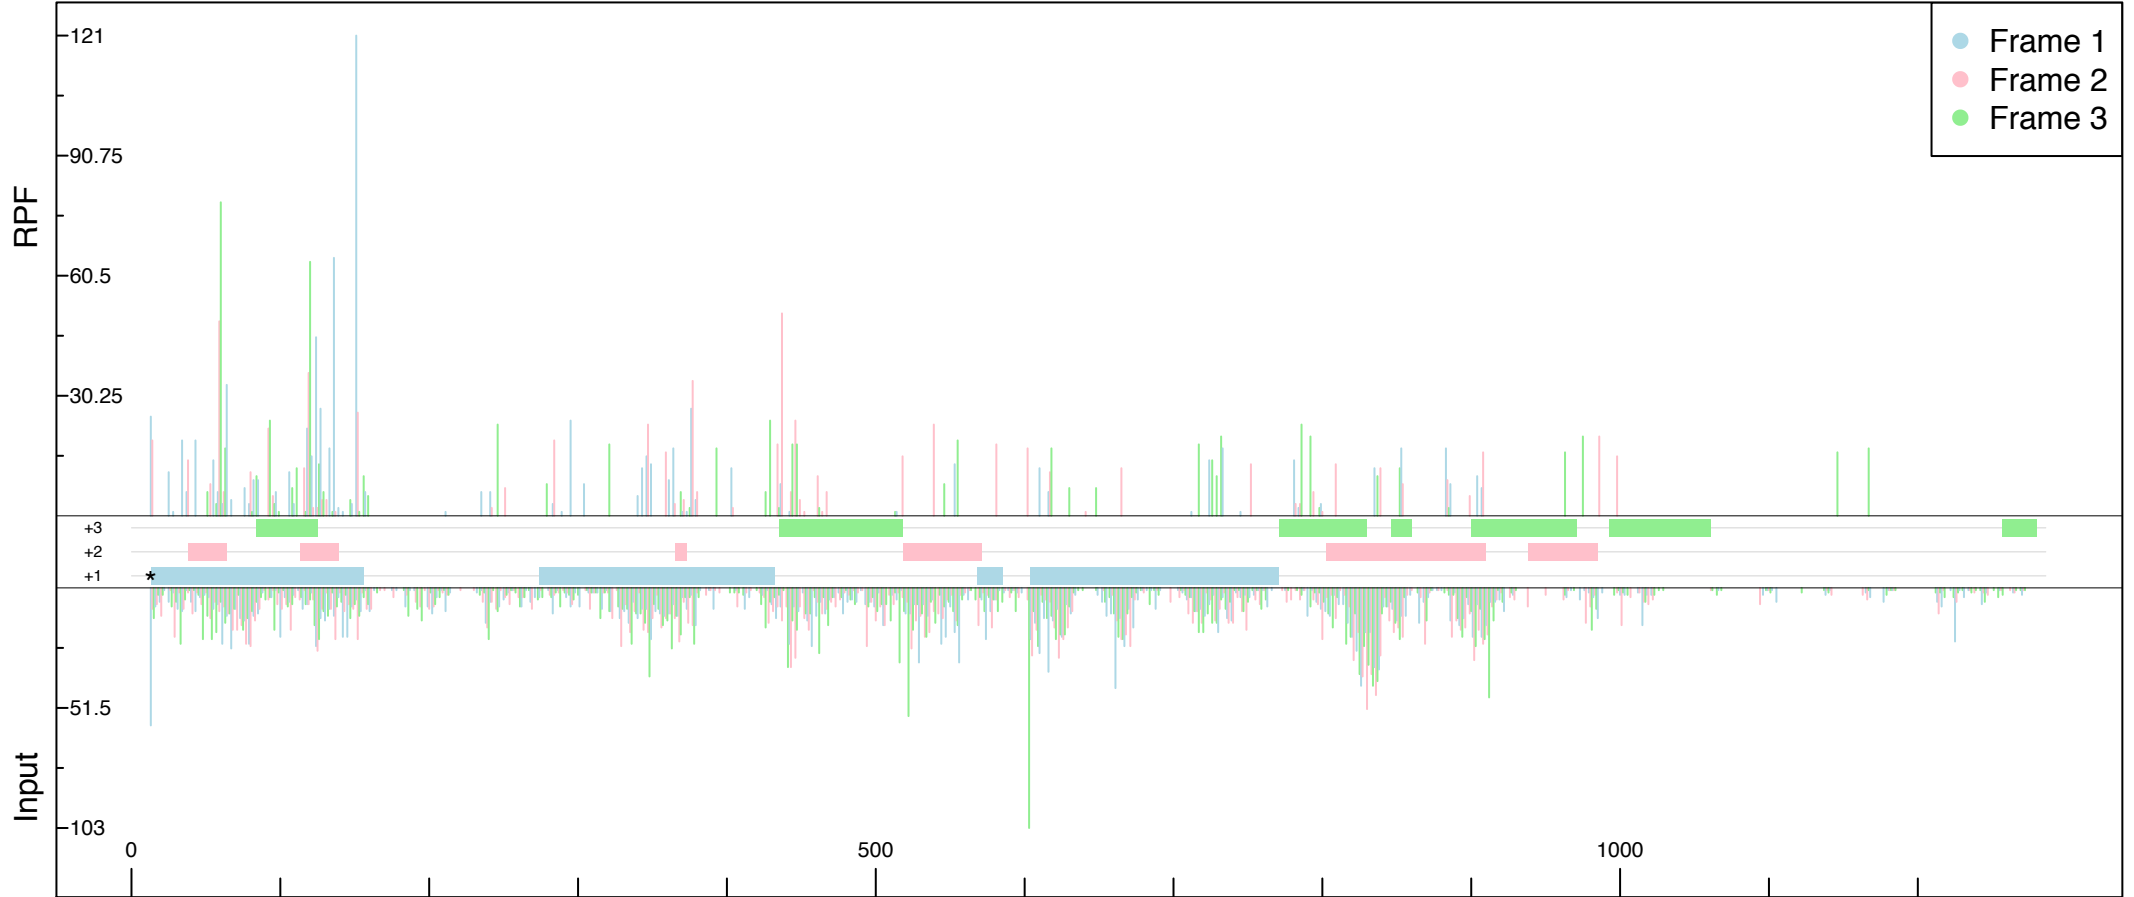

\*MLVNLTRMHAHSGASPLGVKVDQRCVICMFSSFHVAGLKLKEMIFAKL

ENSDART00000132143, Global

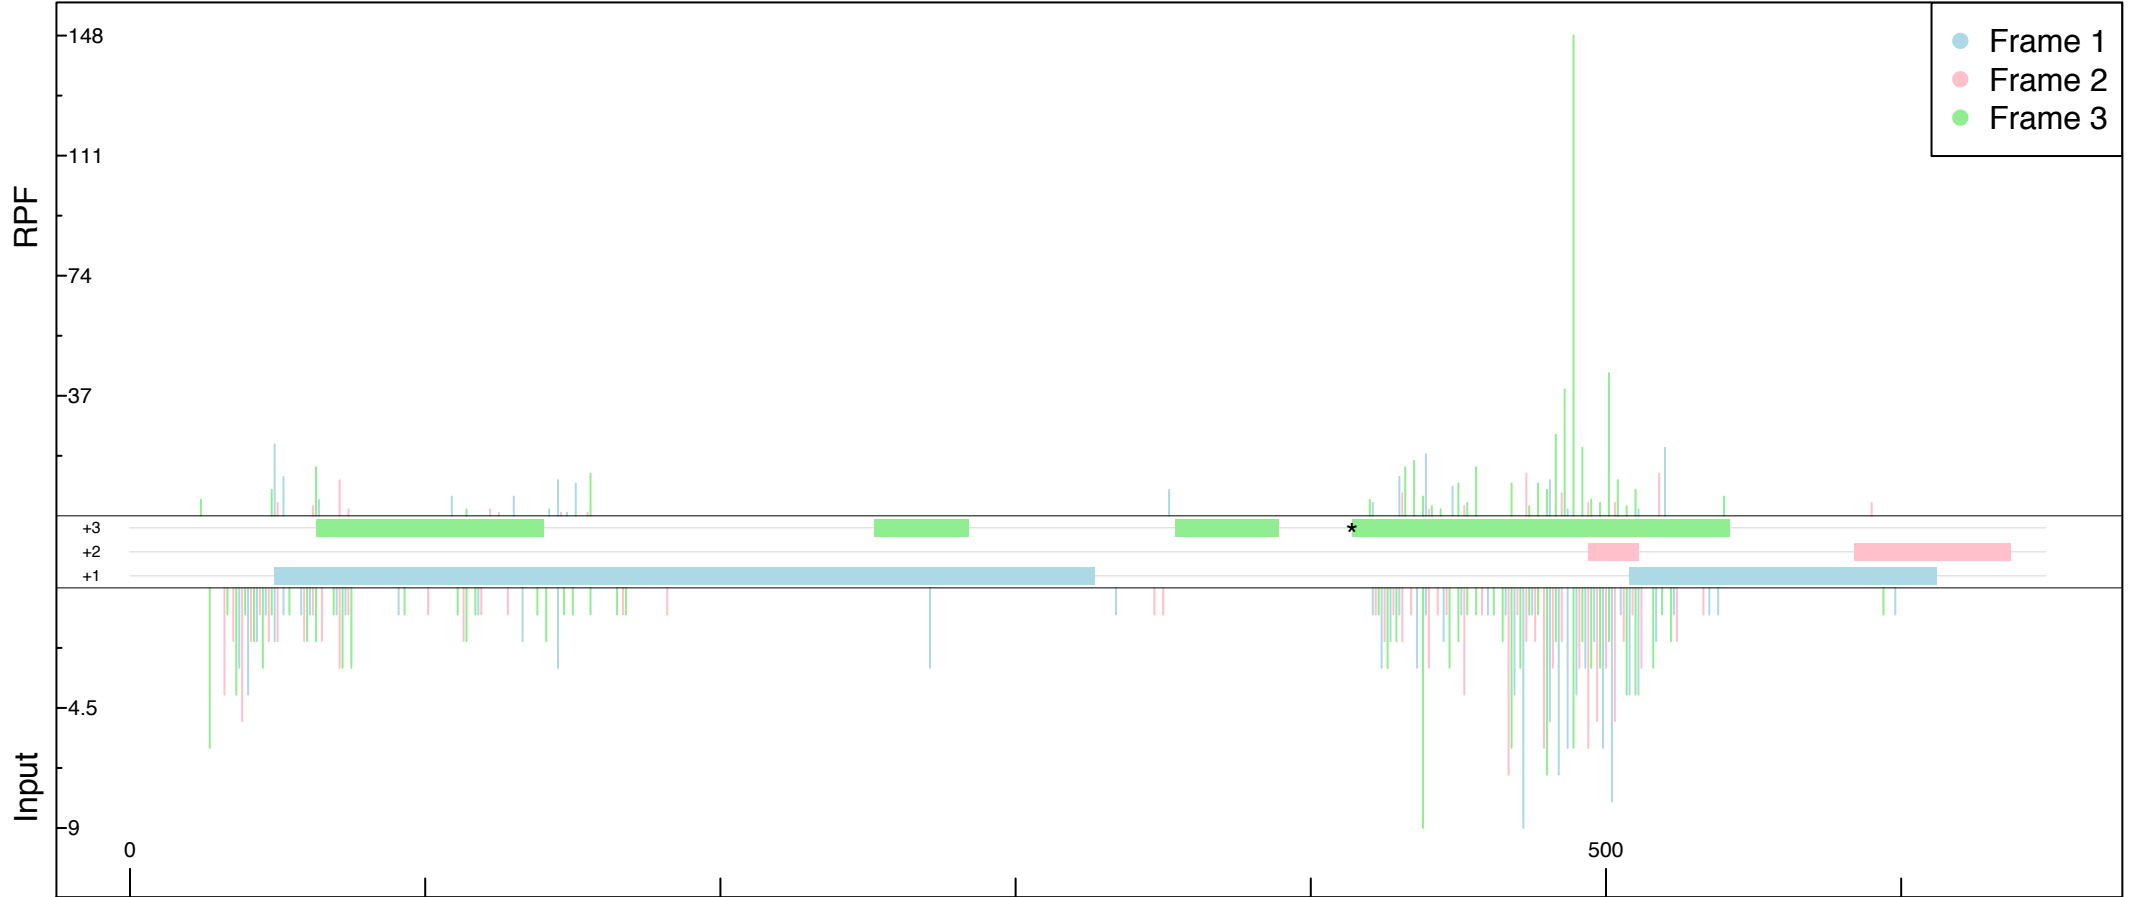

\*MPDCSSTPNSVGPADQCLQYYHKLLGRCVDSYEPNLGRLVFR

ENSDART00000136523, Global

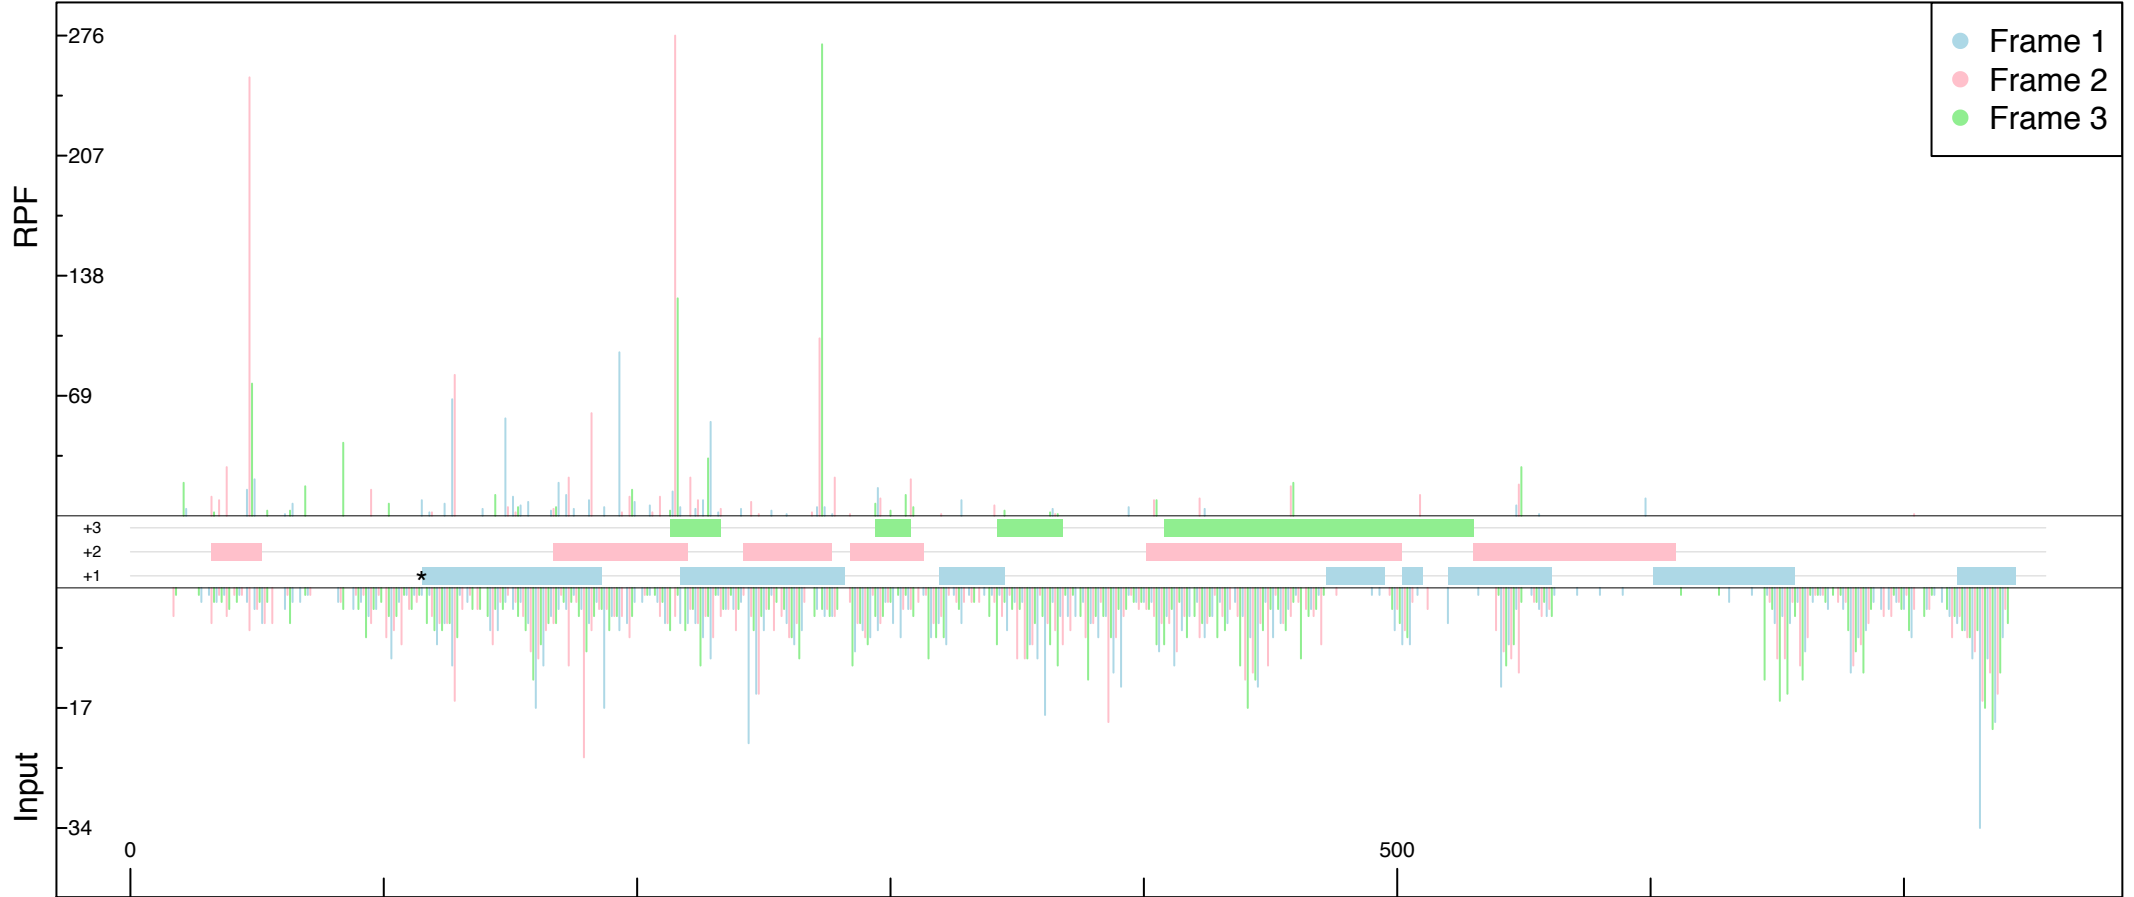

\*MCSAVQLEGCLKRWIKLYGDGVS

# Zv9\_00058239, Global

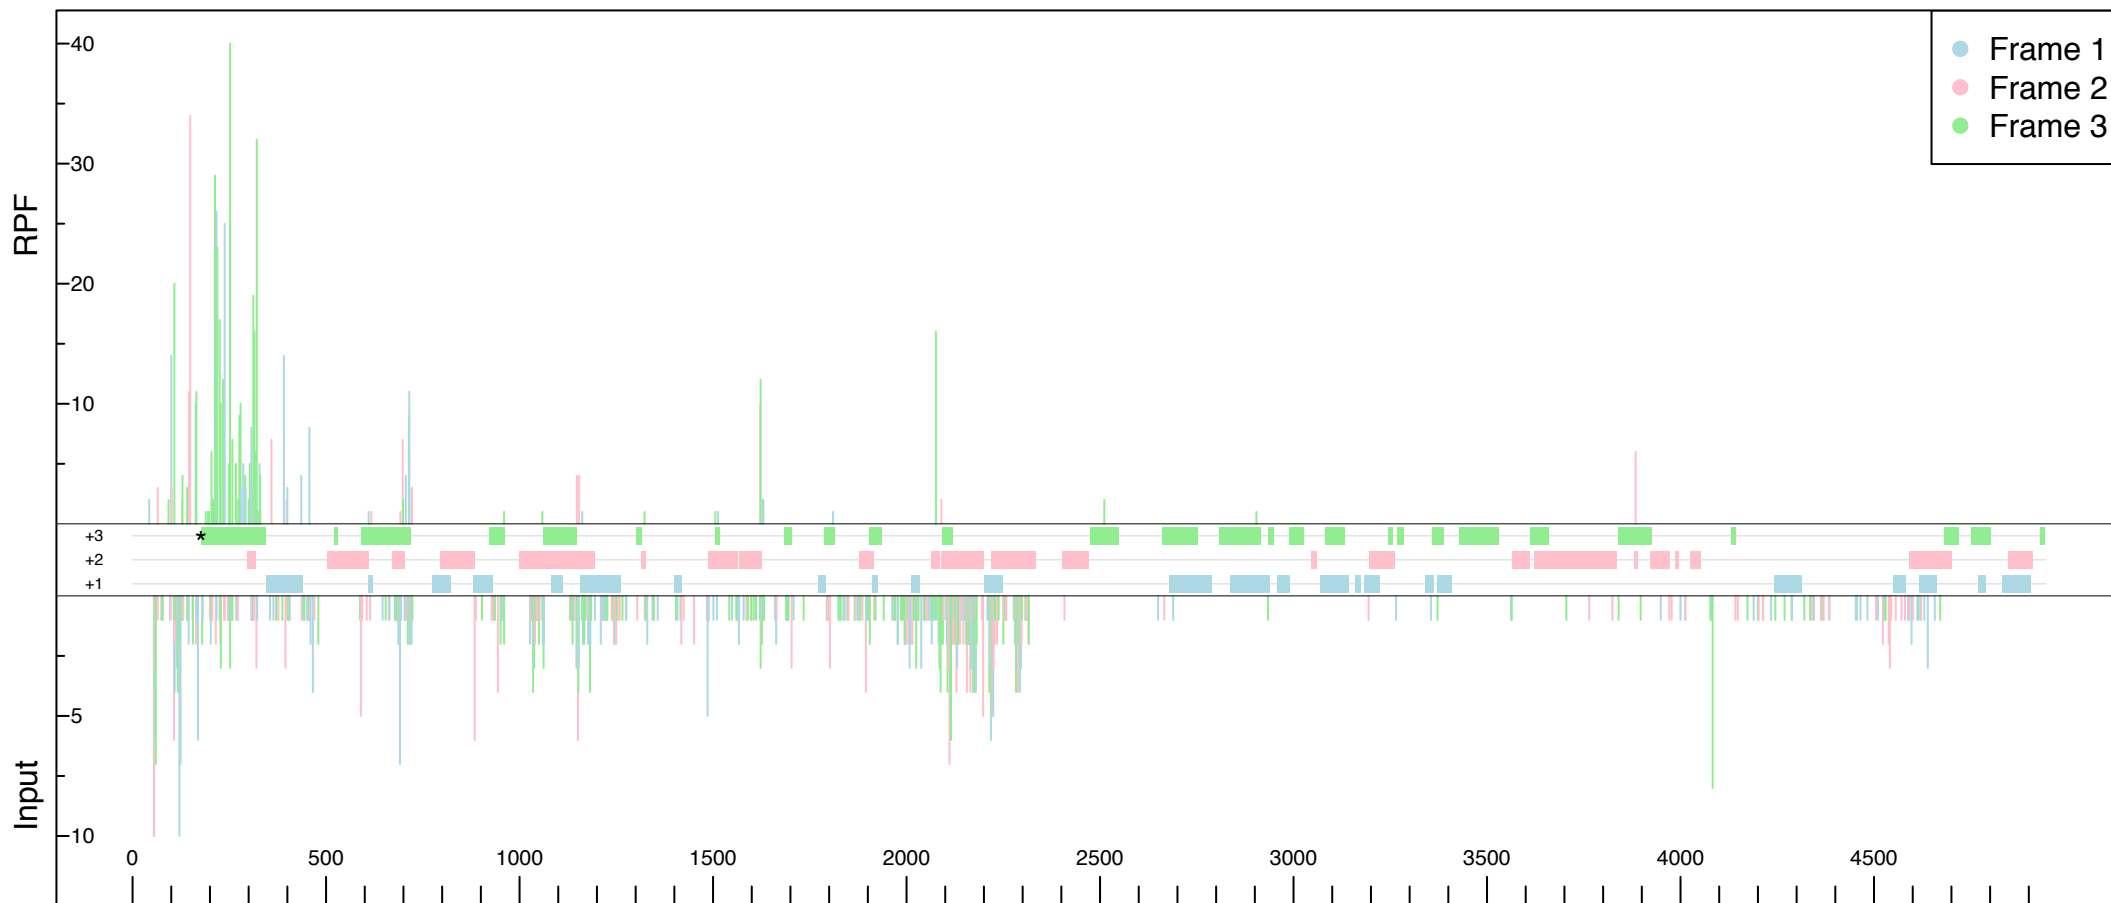

\*MGQFLVFWSTFLLMCVAFSFSSESTTTQQPTTAPPVRKPCNTLTSCETCLANVS



linc-abhd6a, Global

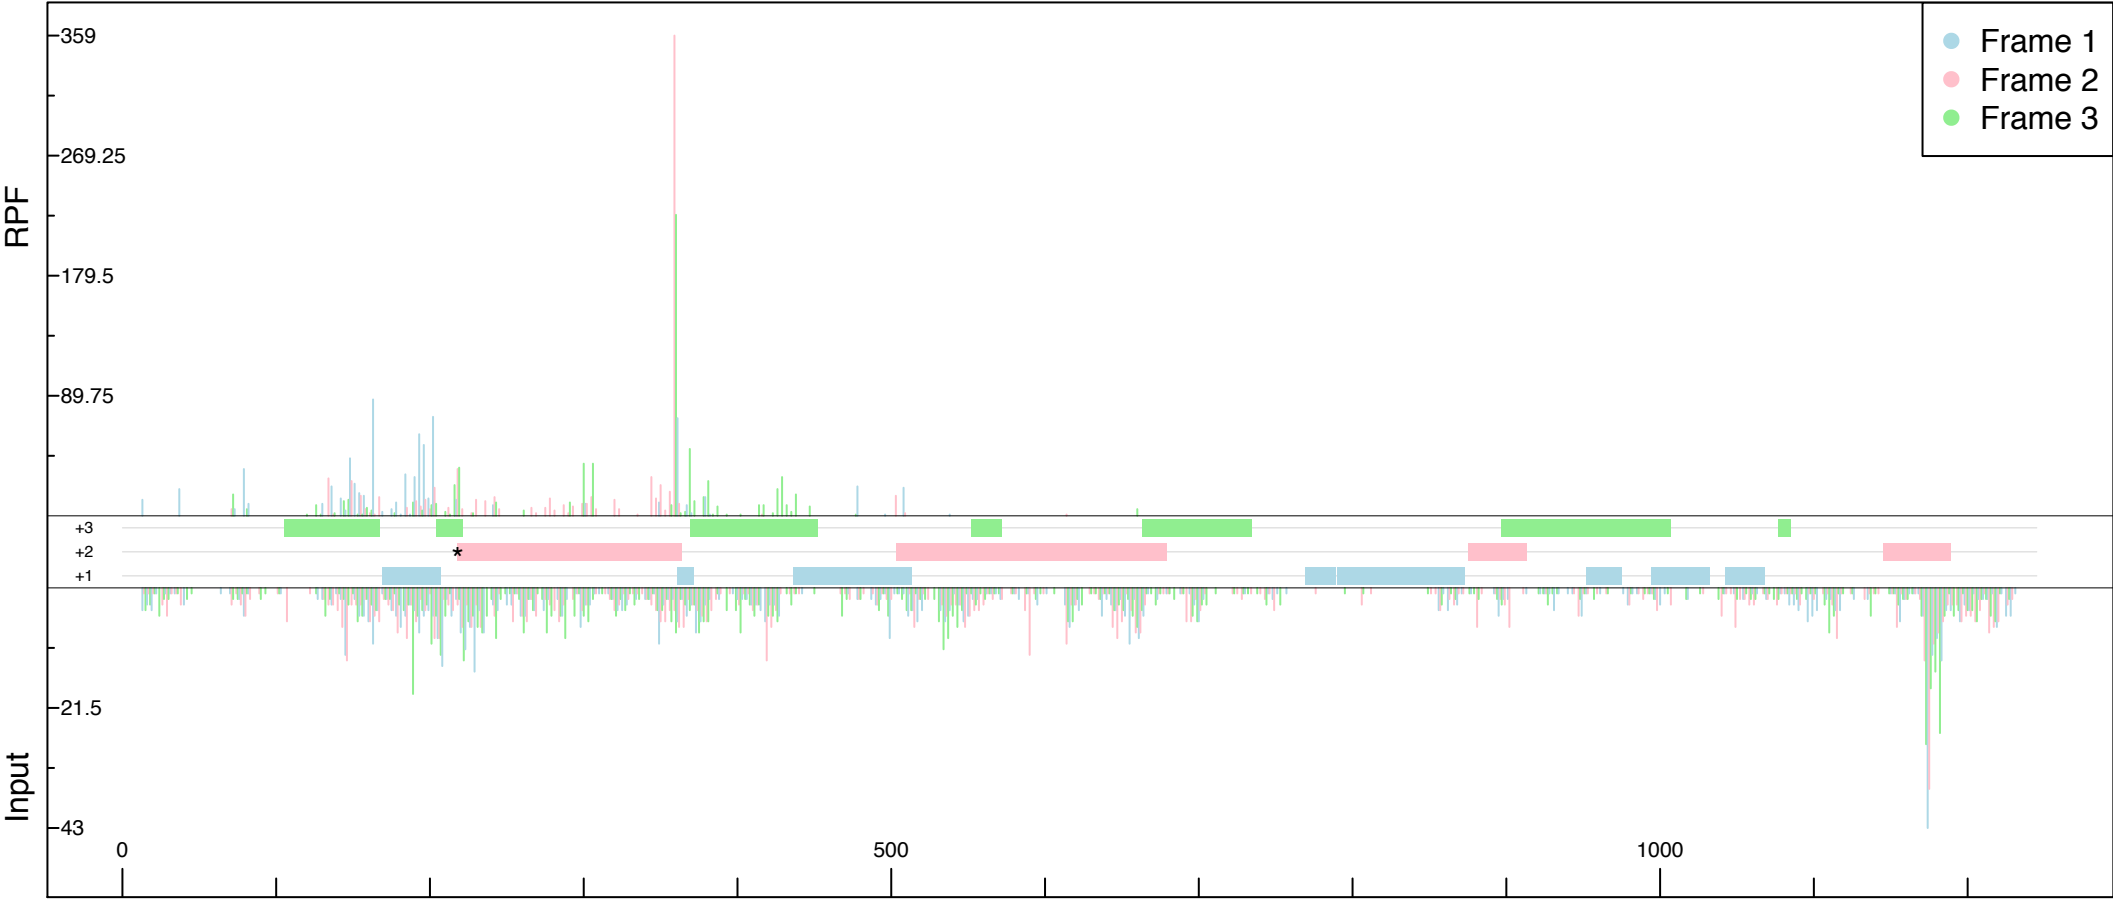

\*MKTAGAELEAADLLHHLSTRASAKSTRAGVEEASSSSTSTADAQTLAV

# linc-mipep1, Global

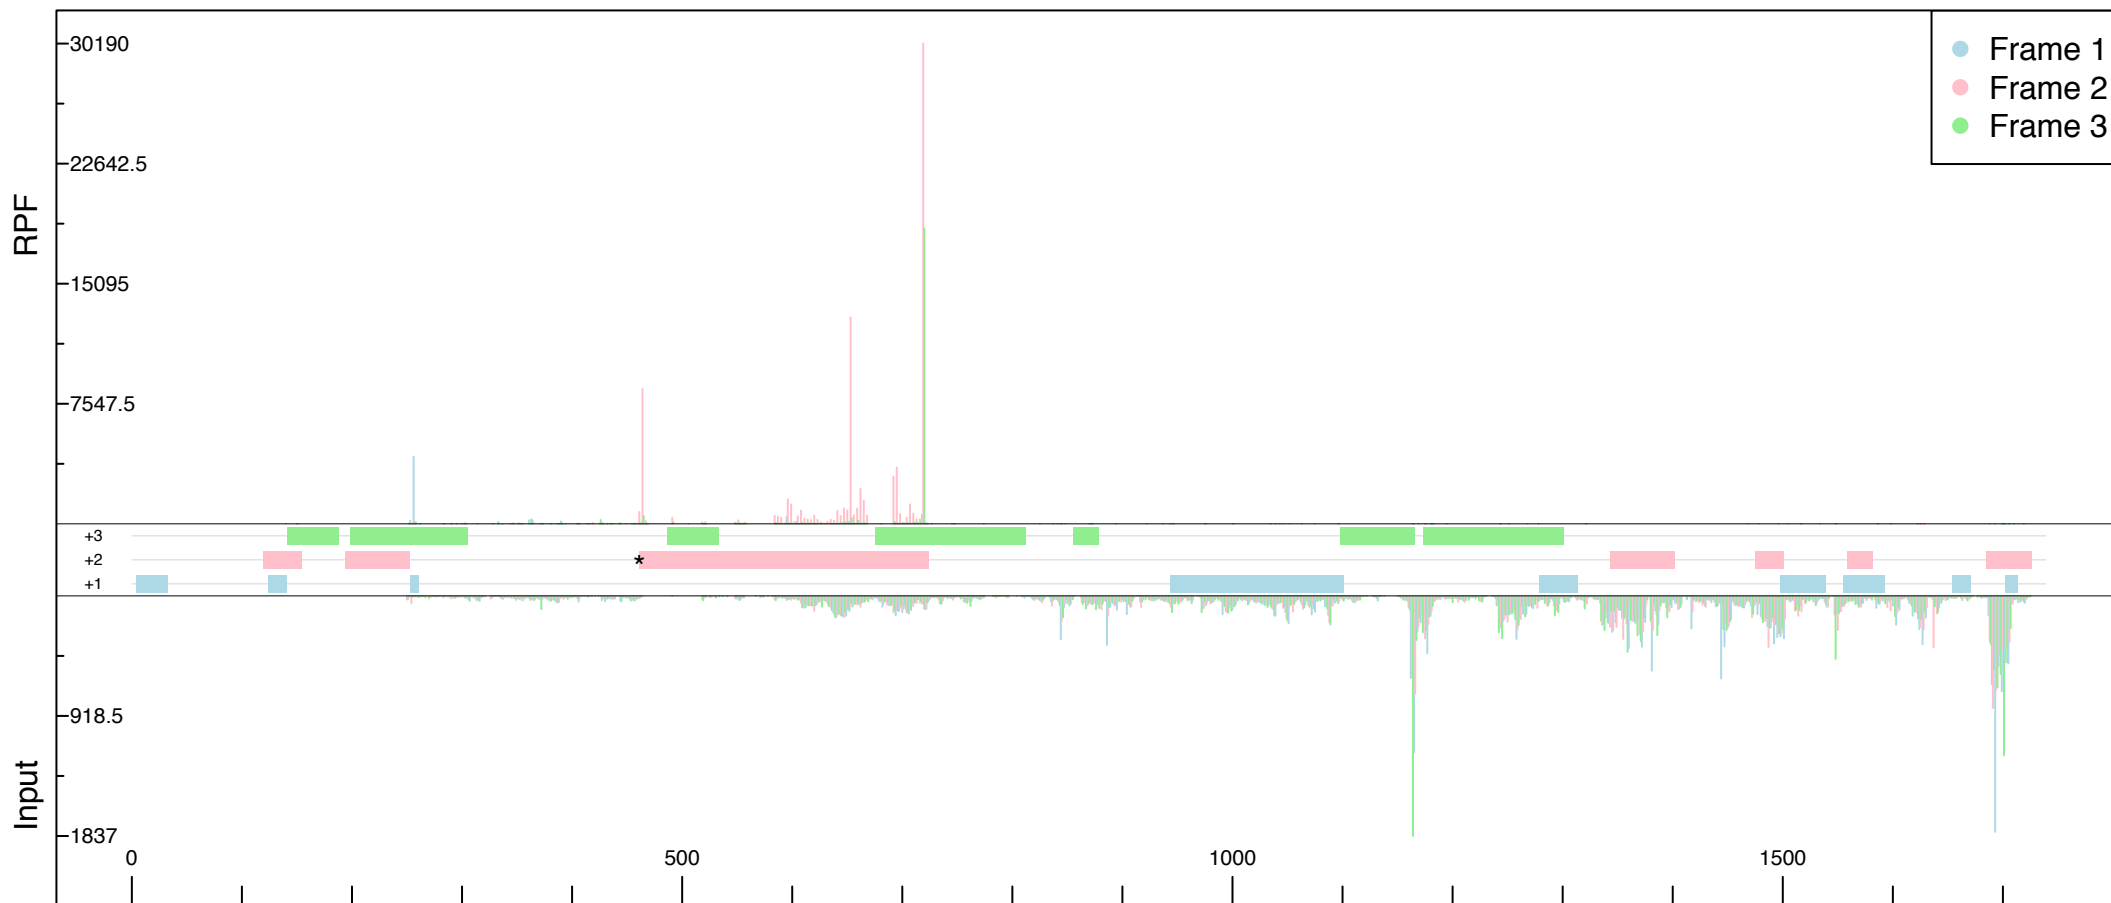

\*MPKRSKANNDAEVSEPKRRSERLVNKPAPPKAEPKPKKAPAKPKKTKEPKPKKEEEKKEEVPAENGETKADDDASATEDGDKKEDGE

# linc-cldn7a, Global

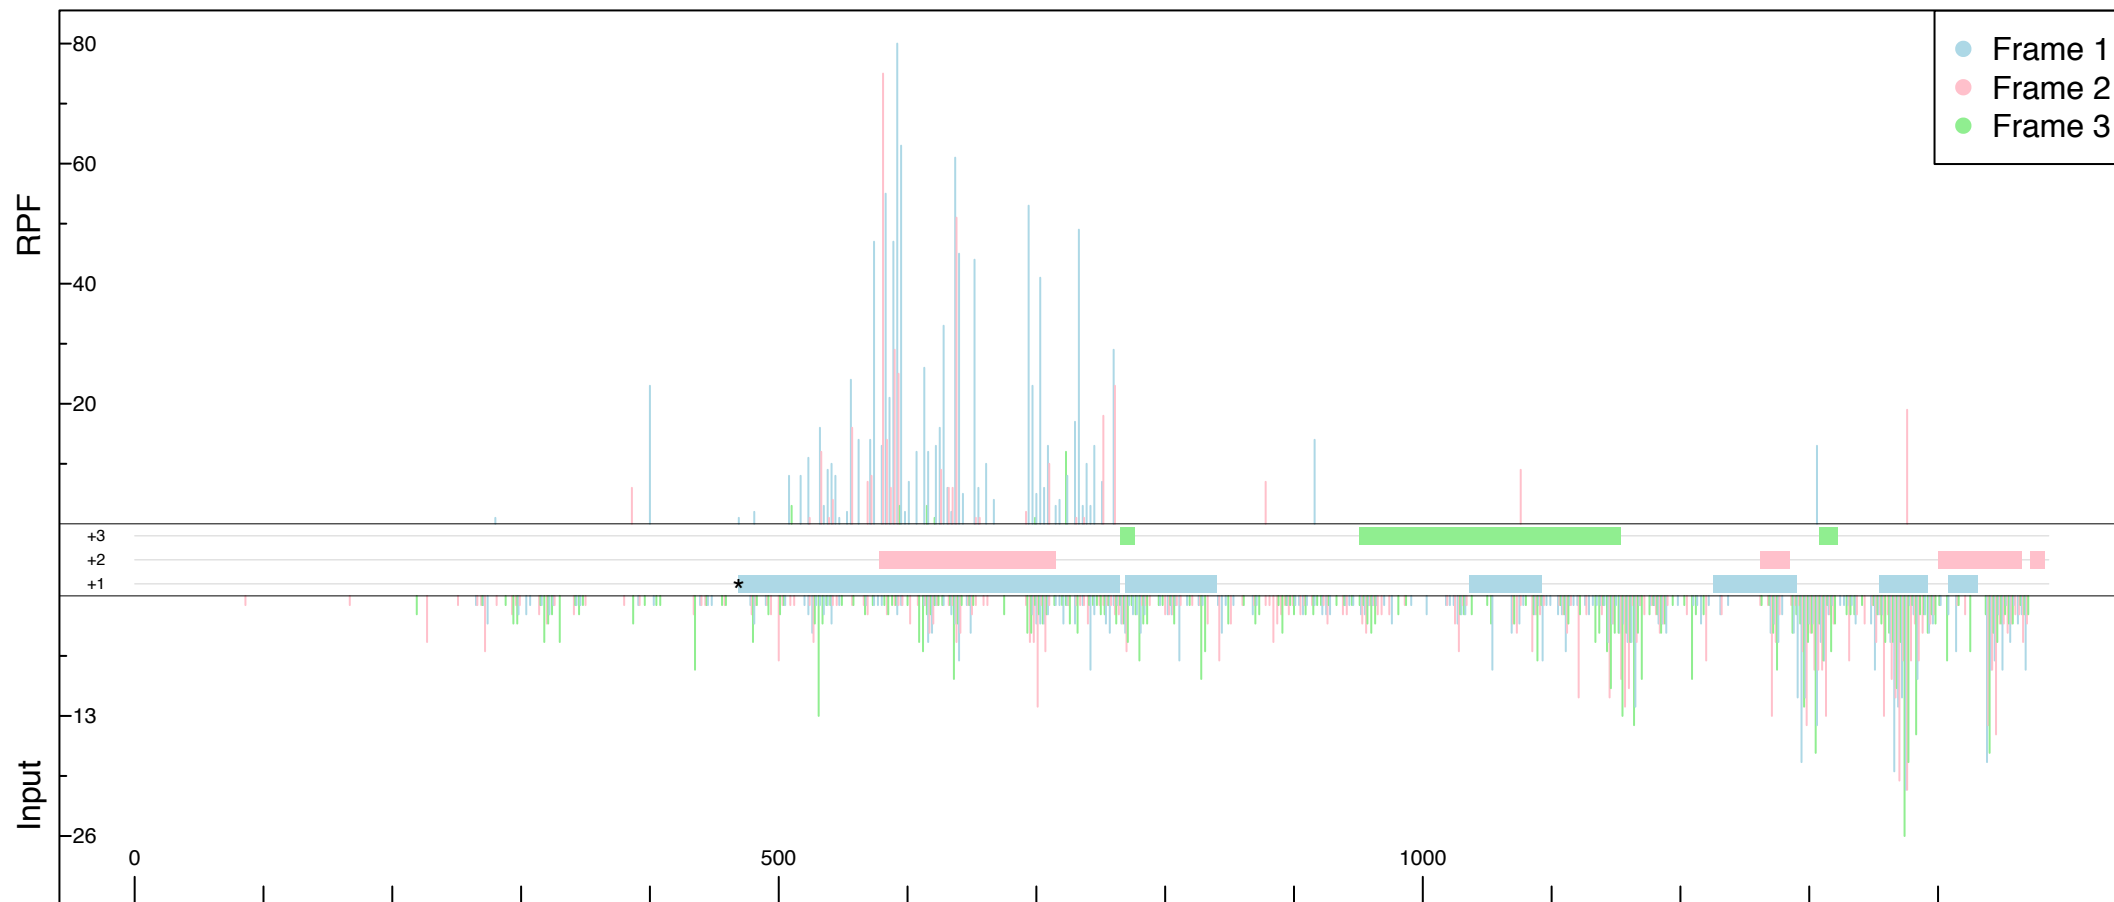

\*MNTPTEVQQQEDMYGMAEMPDLIPPAGALQPSVIPYDHGQPGRNRPDLLSAPRRMQRAPKLGQIGRSTRVIEDEDLDDIINNRSFPVSQRVSPVA

ENSDART00000132796, Global

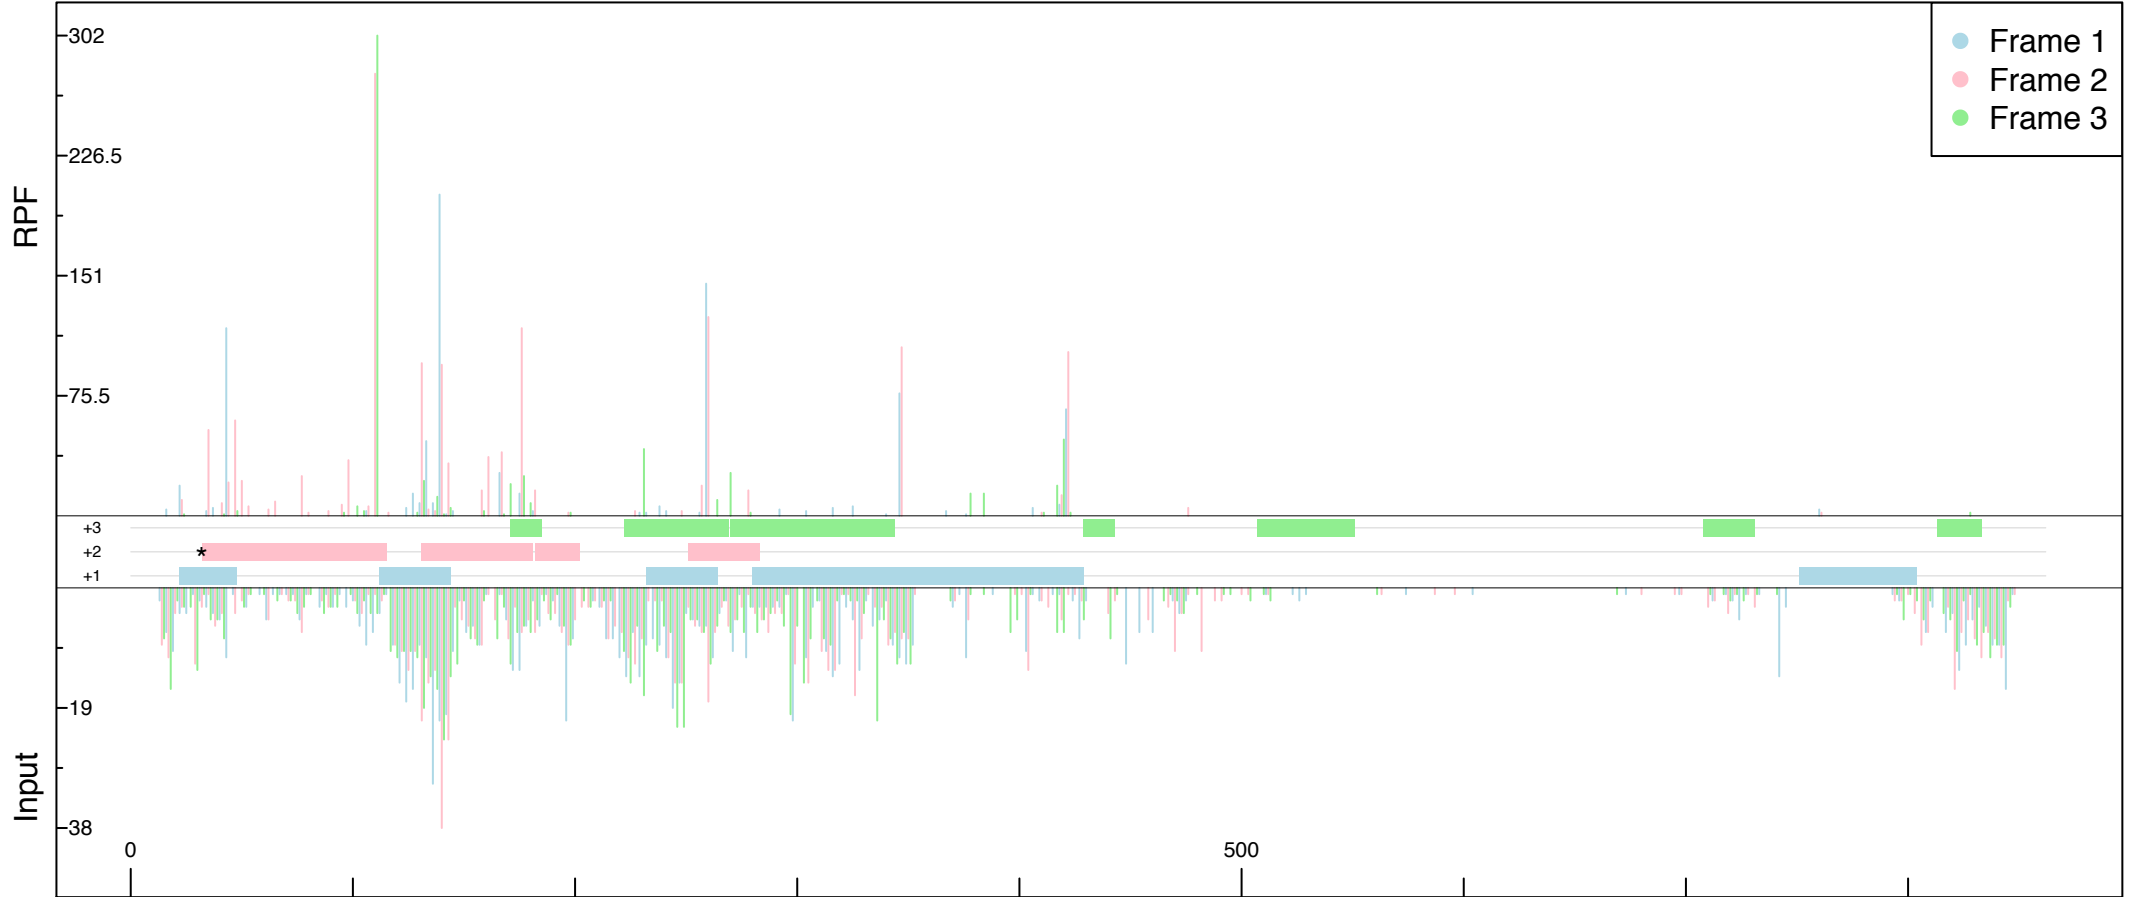

\*MLTFPEMGVQFNHVVPLITTCPEVG

# ENSDART00000138452, Global

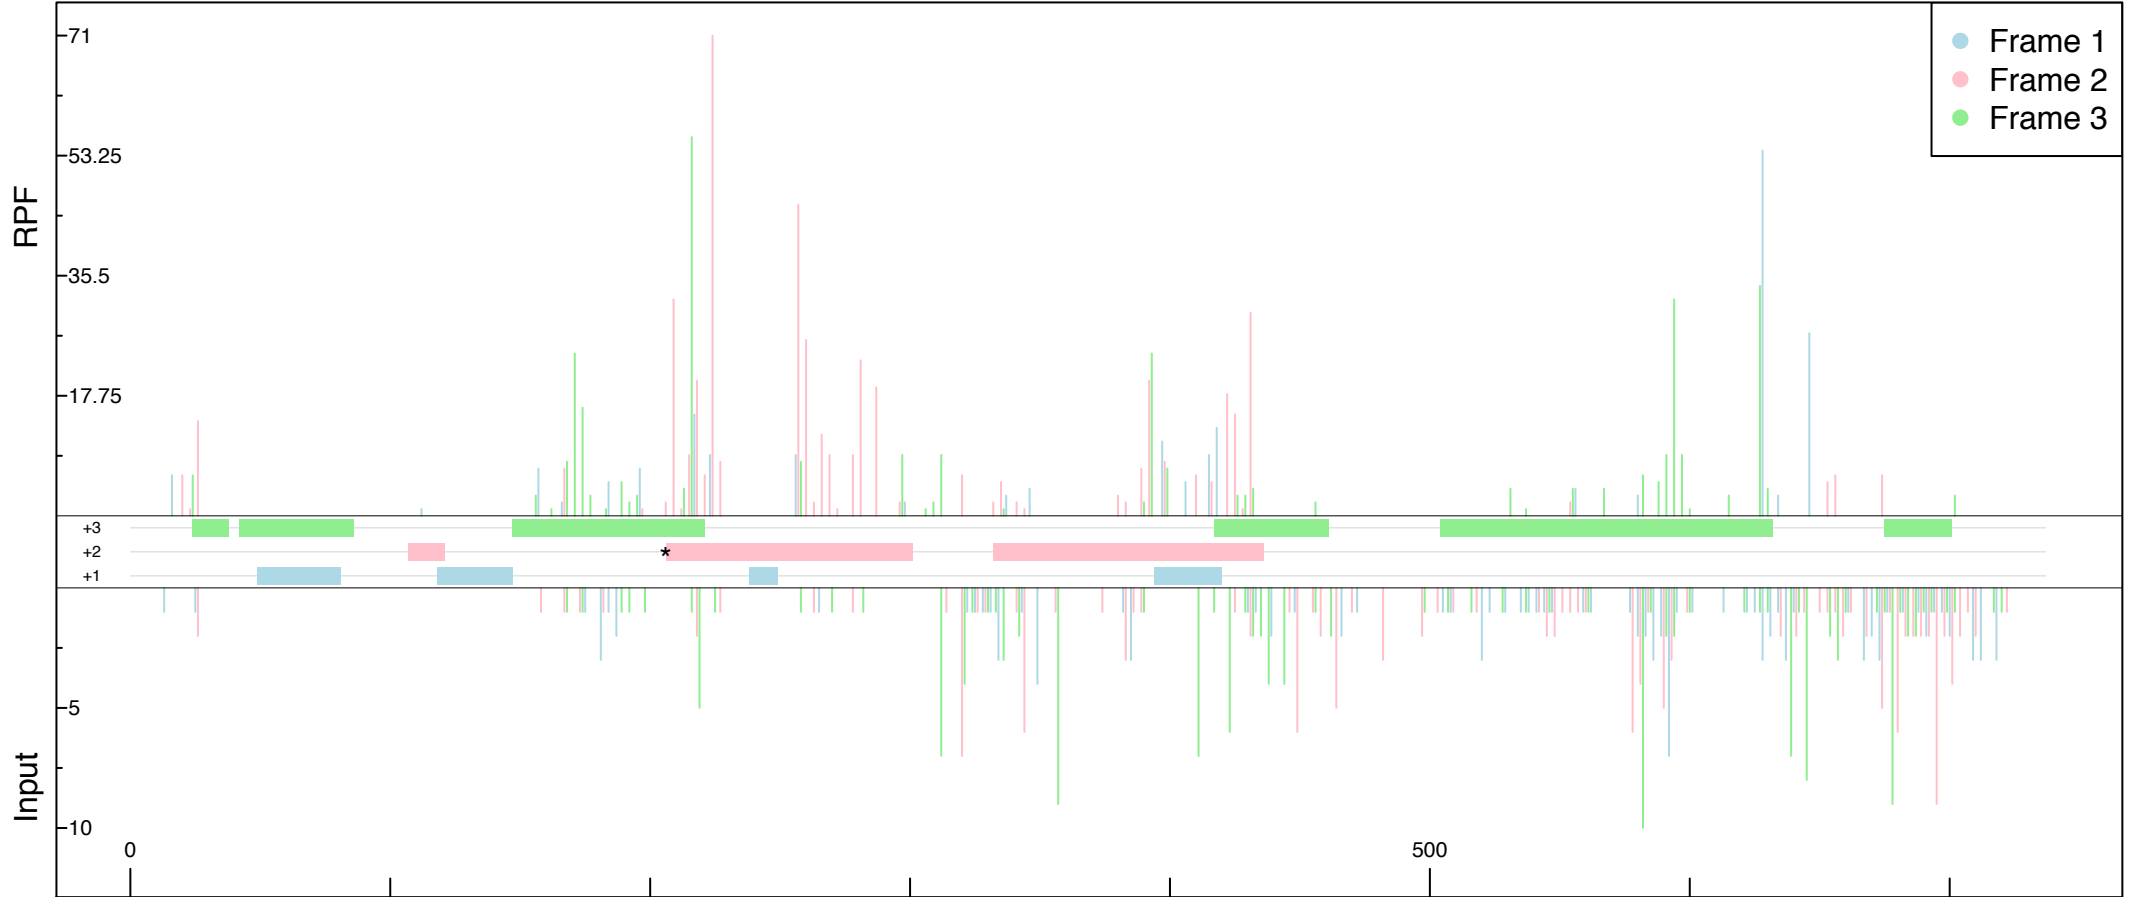

\*MDNCVKIKLKECSLEELIPTFEAQERTFPRF

ENSDART00000135906, Global

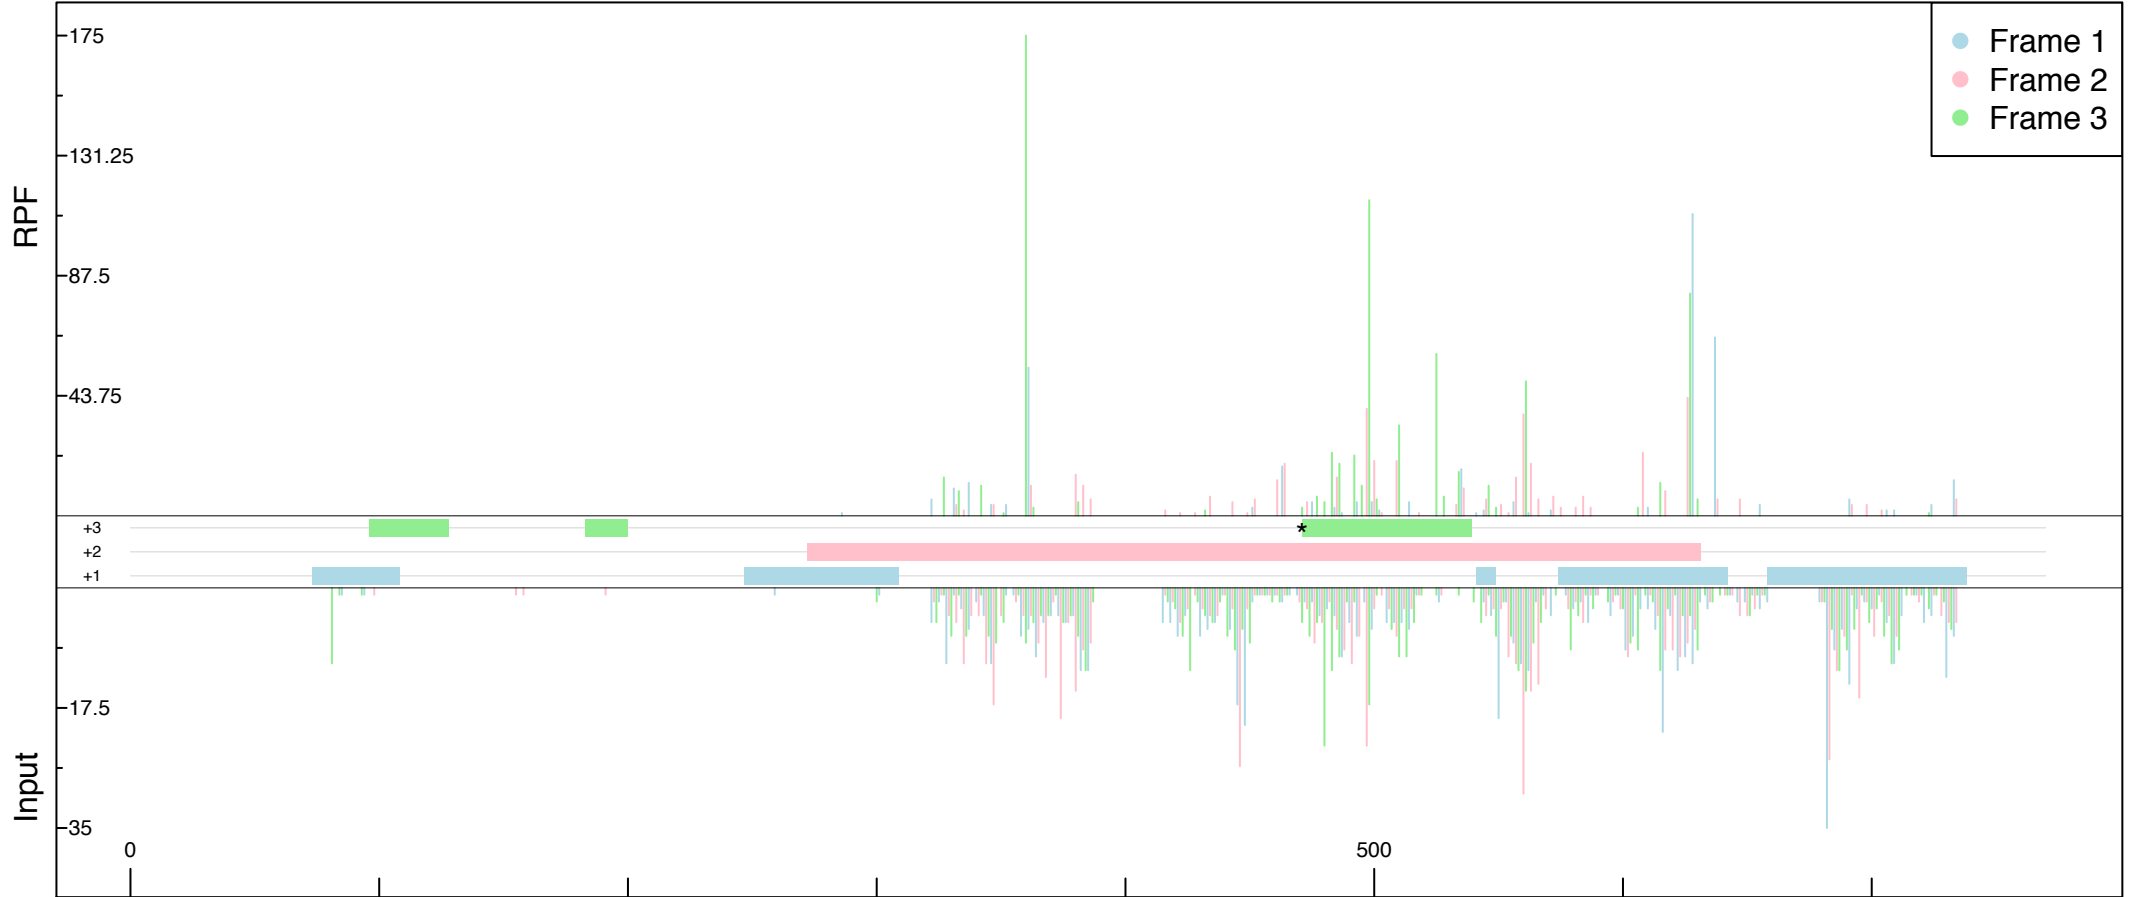

\*MMA PVW TYRCPRLQVSIKTVYI

ENSDART00000143561, Global

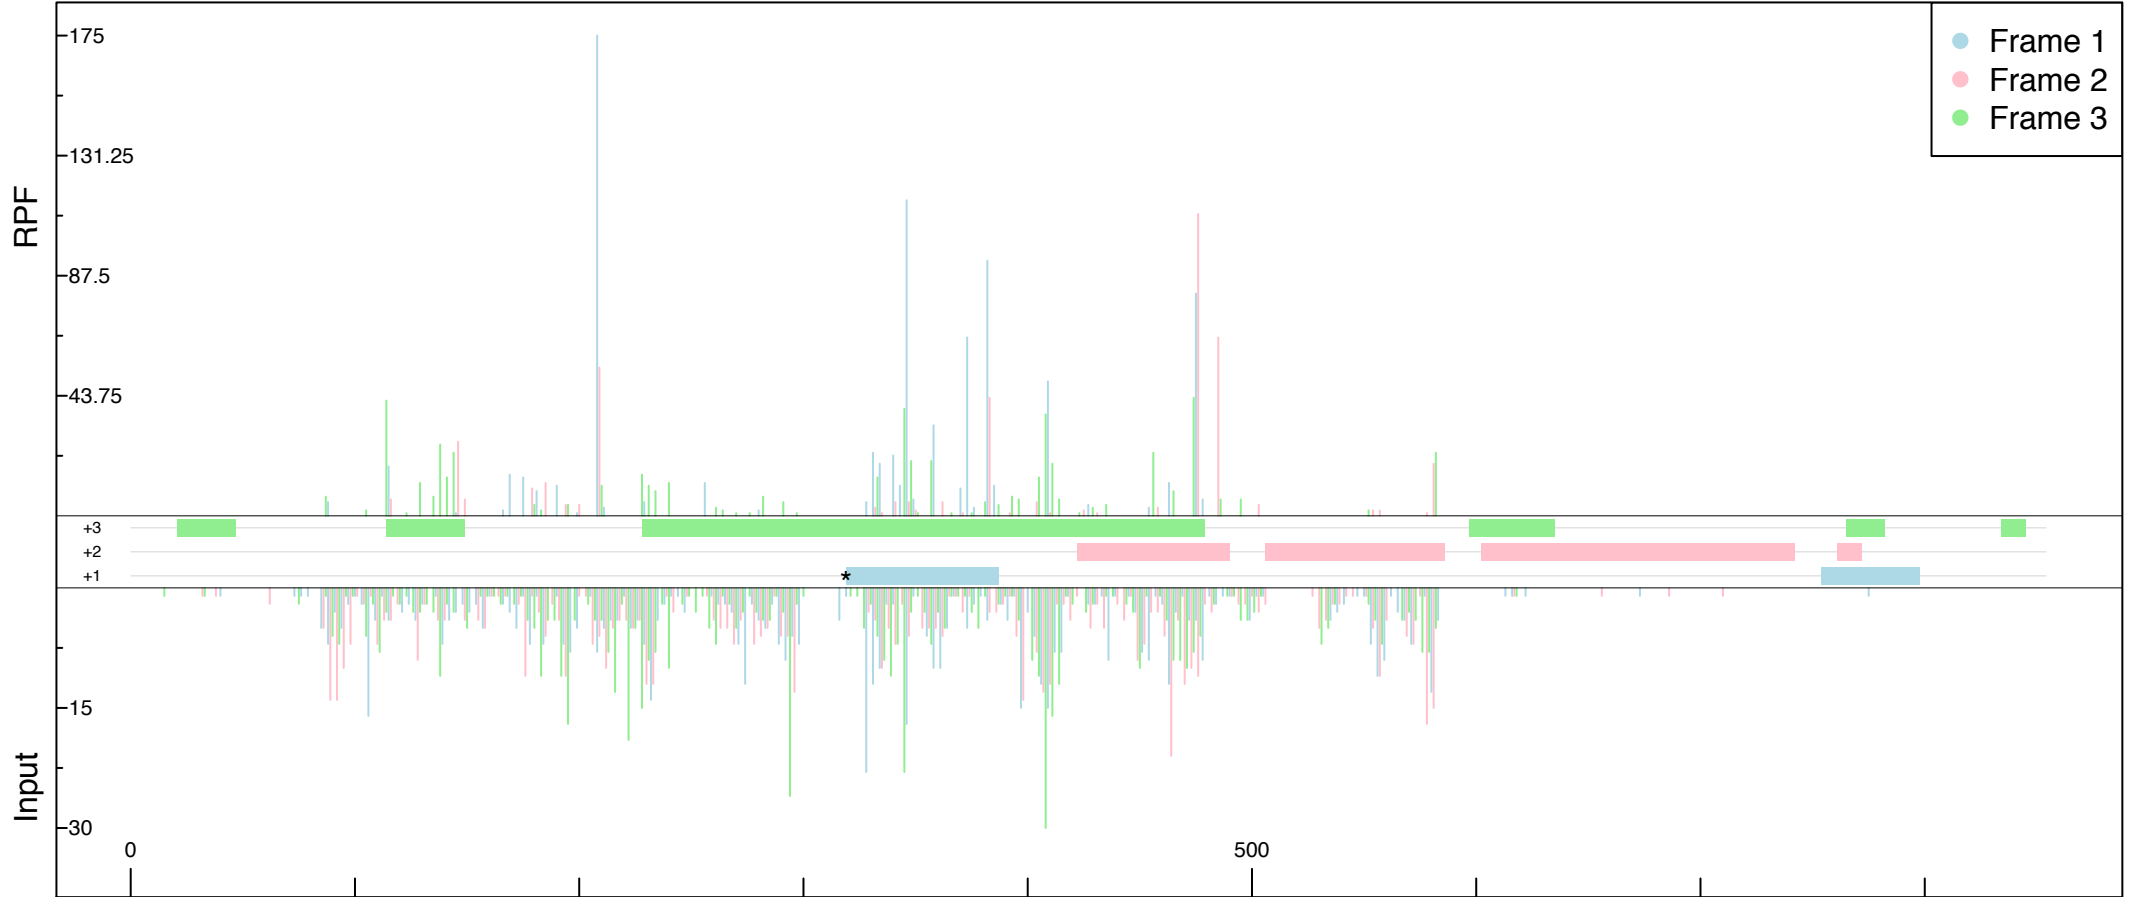

\*MMA PVW TYRCPRLQVSIKTVYI

ENSDART00000140354, Global

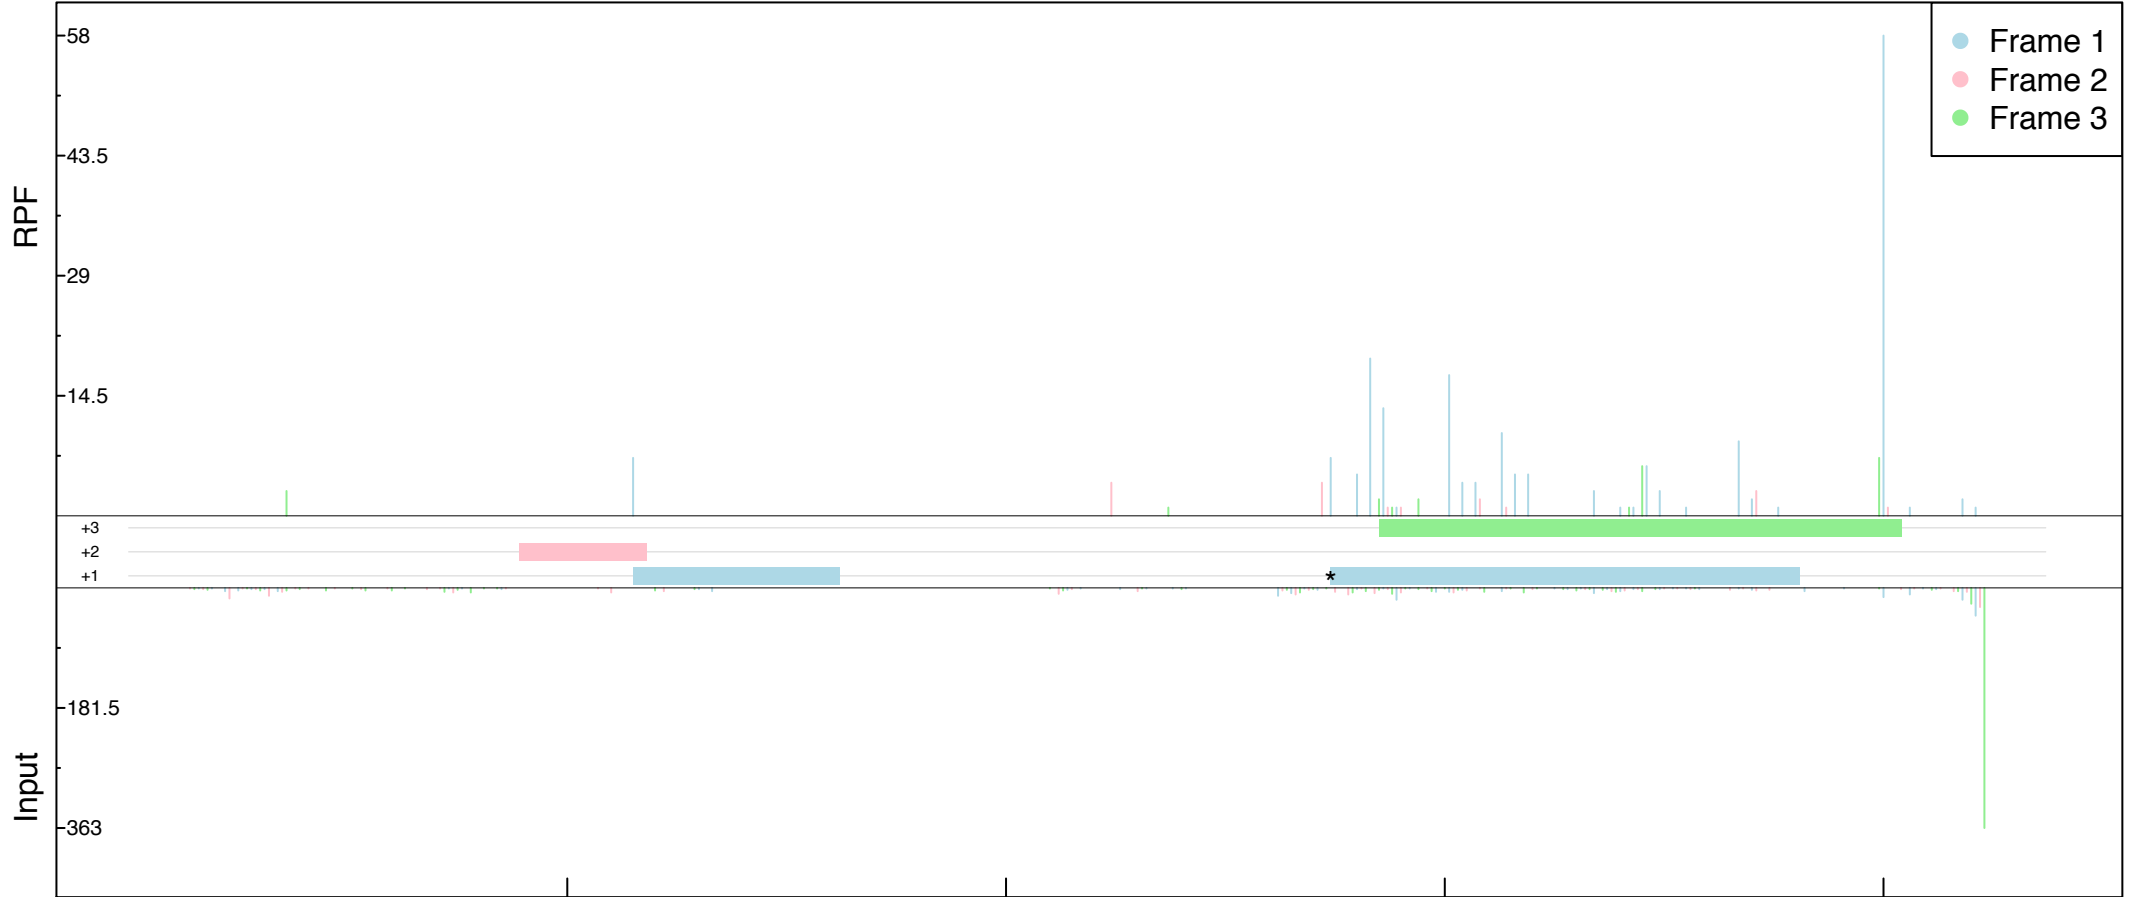

\*MIQSWVRQASMTTRRLCKEQGSSREQRDPEPQAQY



ENSDART00000144789, Global

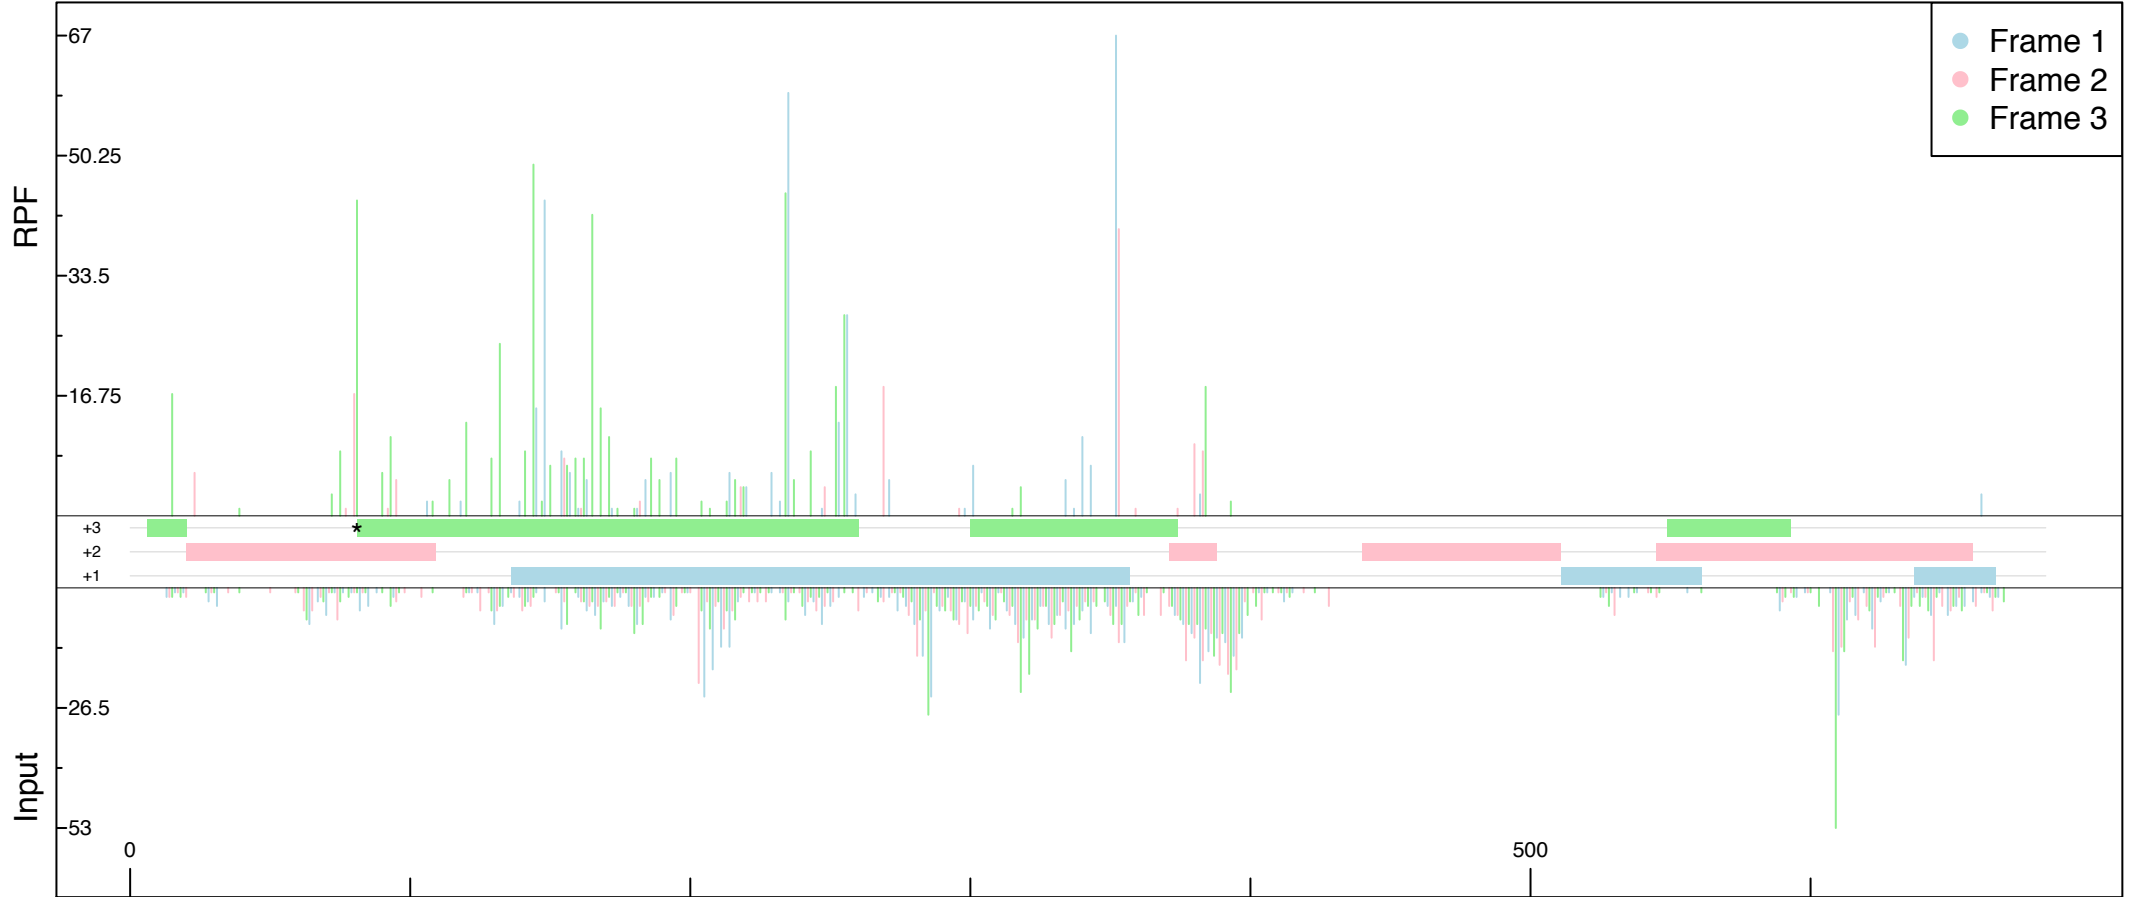

\*MGPHLDFTTDFESGLKLYAEDAFACTLEFKGRVADTNCLSVLETRGEAVFKRMGLLYHM

ENSDART00000147256, Global

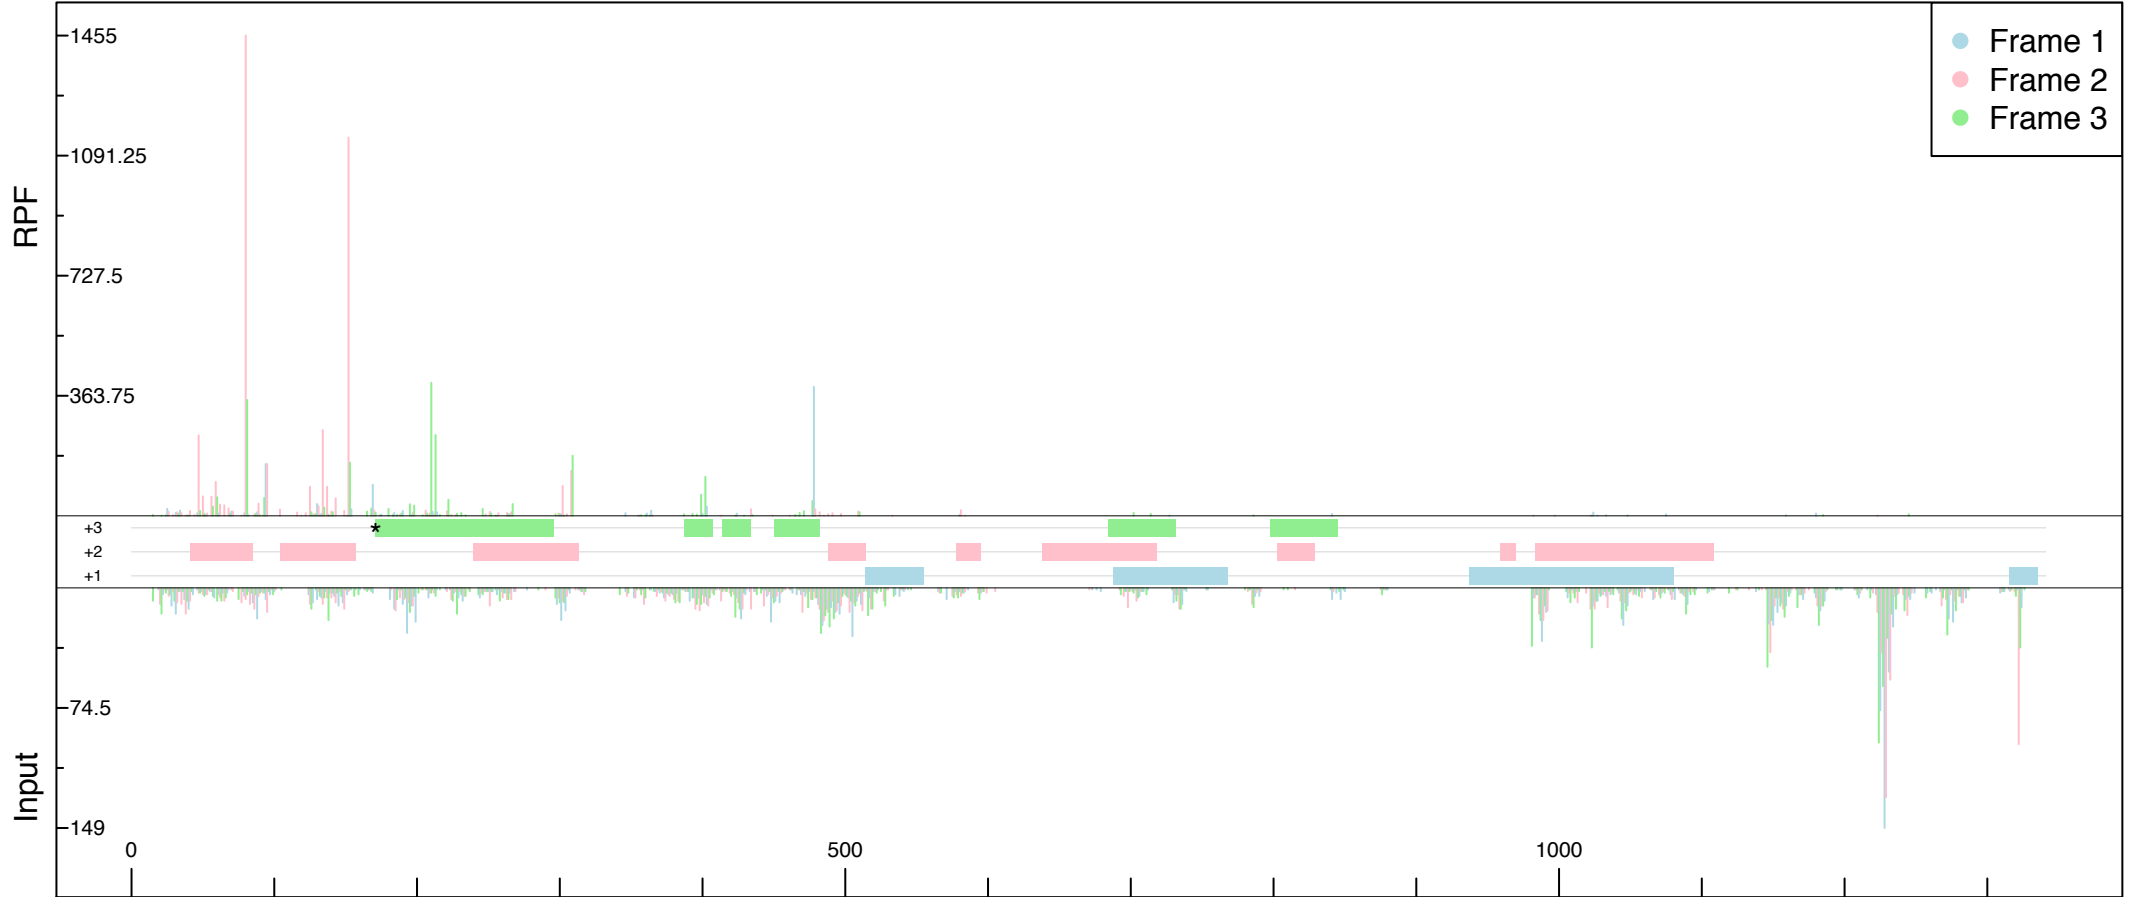

\*MMKKNYLEQRGWIKARLTEVLKSCNVIKQQLGLILTKPKQT

# ENSDART00000139165, Global

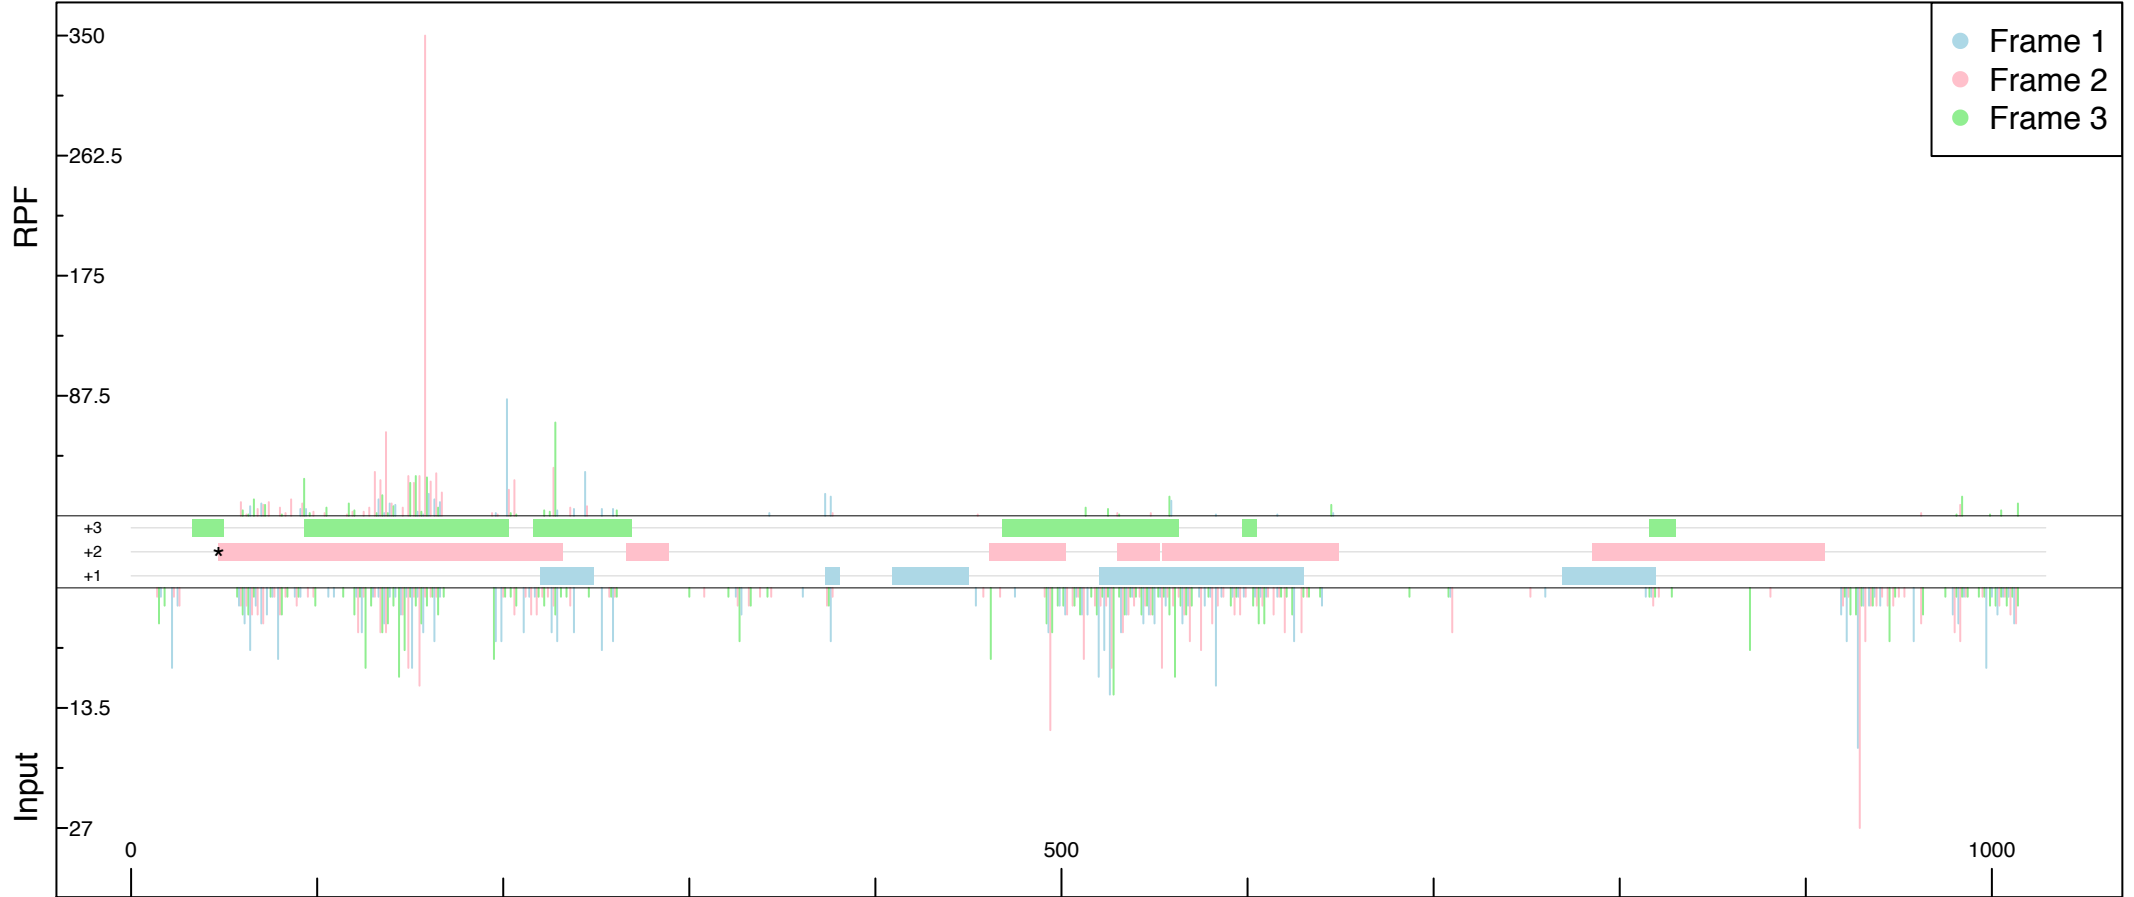

\*MKITVQIENVHKAFPNVDTQVYSSTSKVPYLAETVDHPEHHQWKNASSKPLSEGVHGCWA

ENSDART00000136075, Global

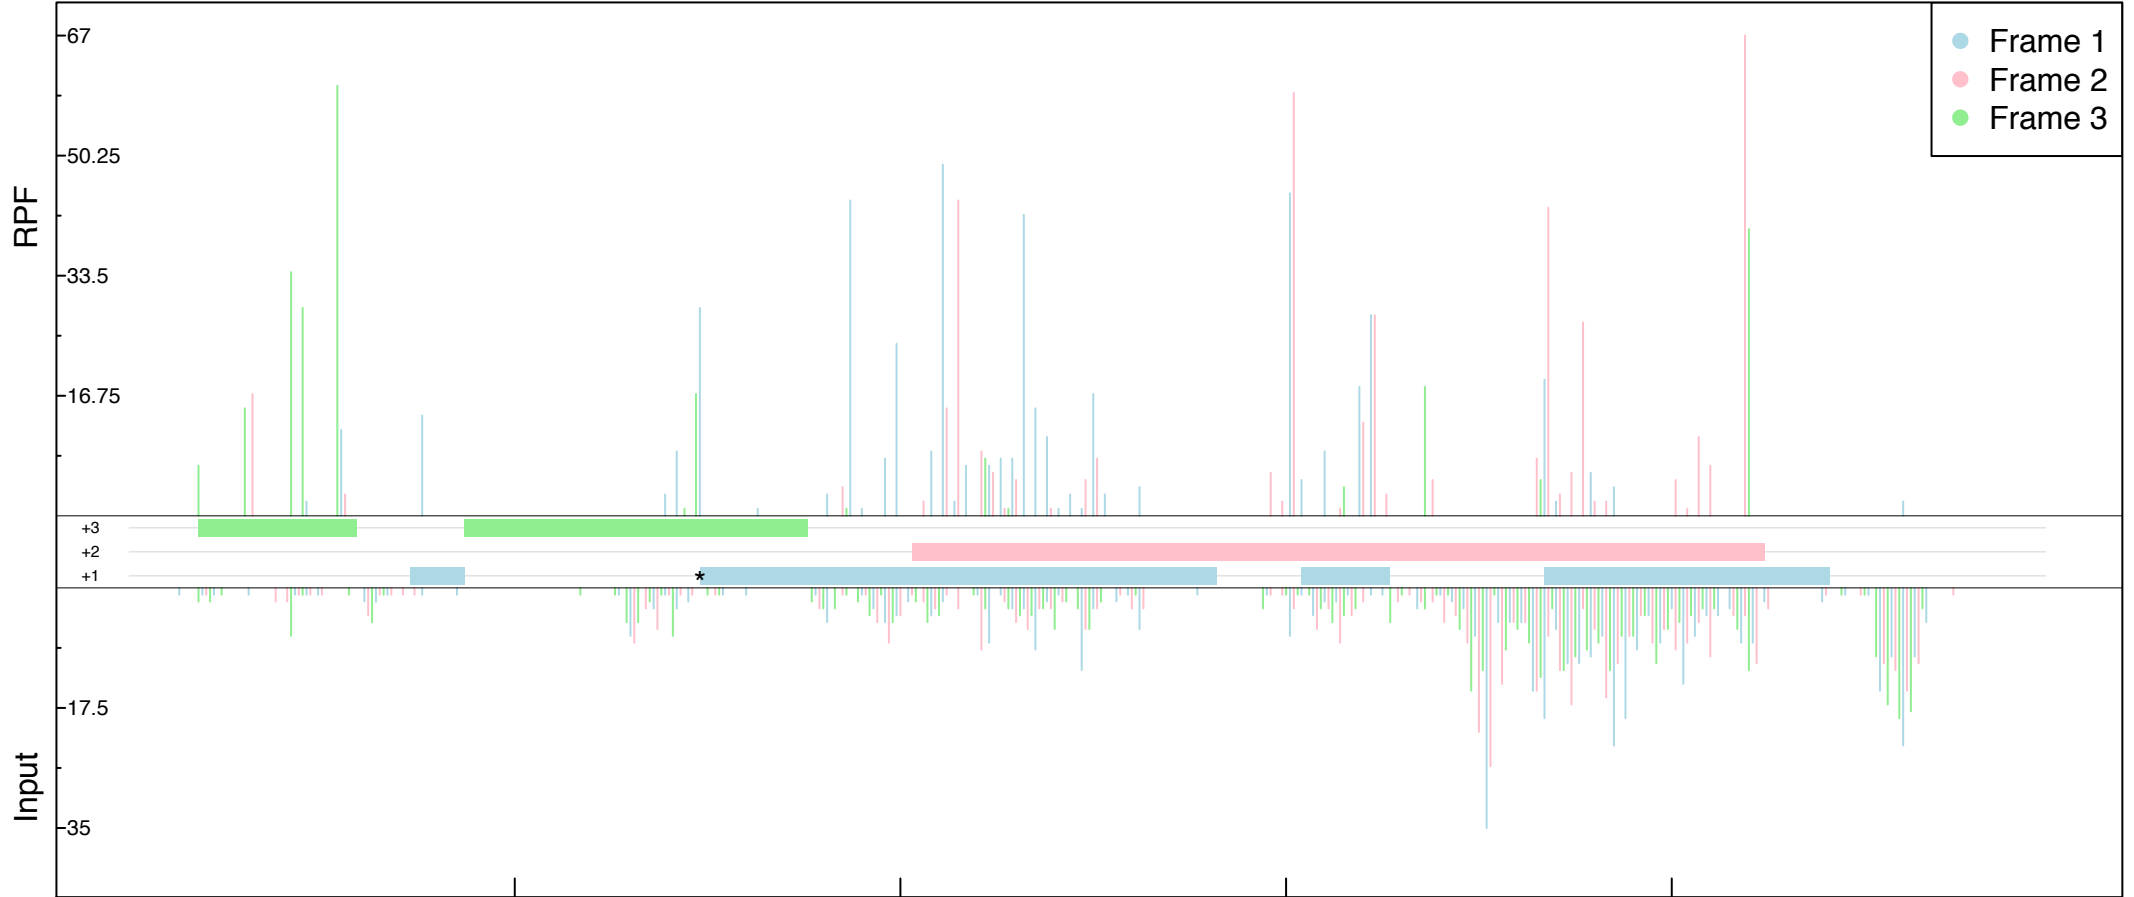

\*MGPHLGFTTDFGSLKLYAEDAFCTLEFKGRVADTICLSVLET

ENSDART00000146233, Global

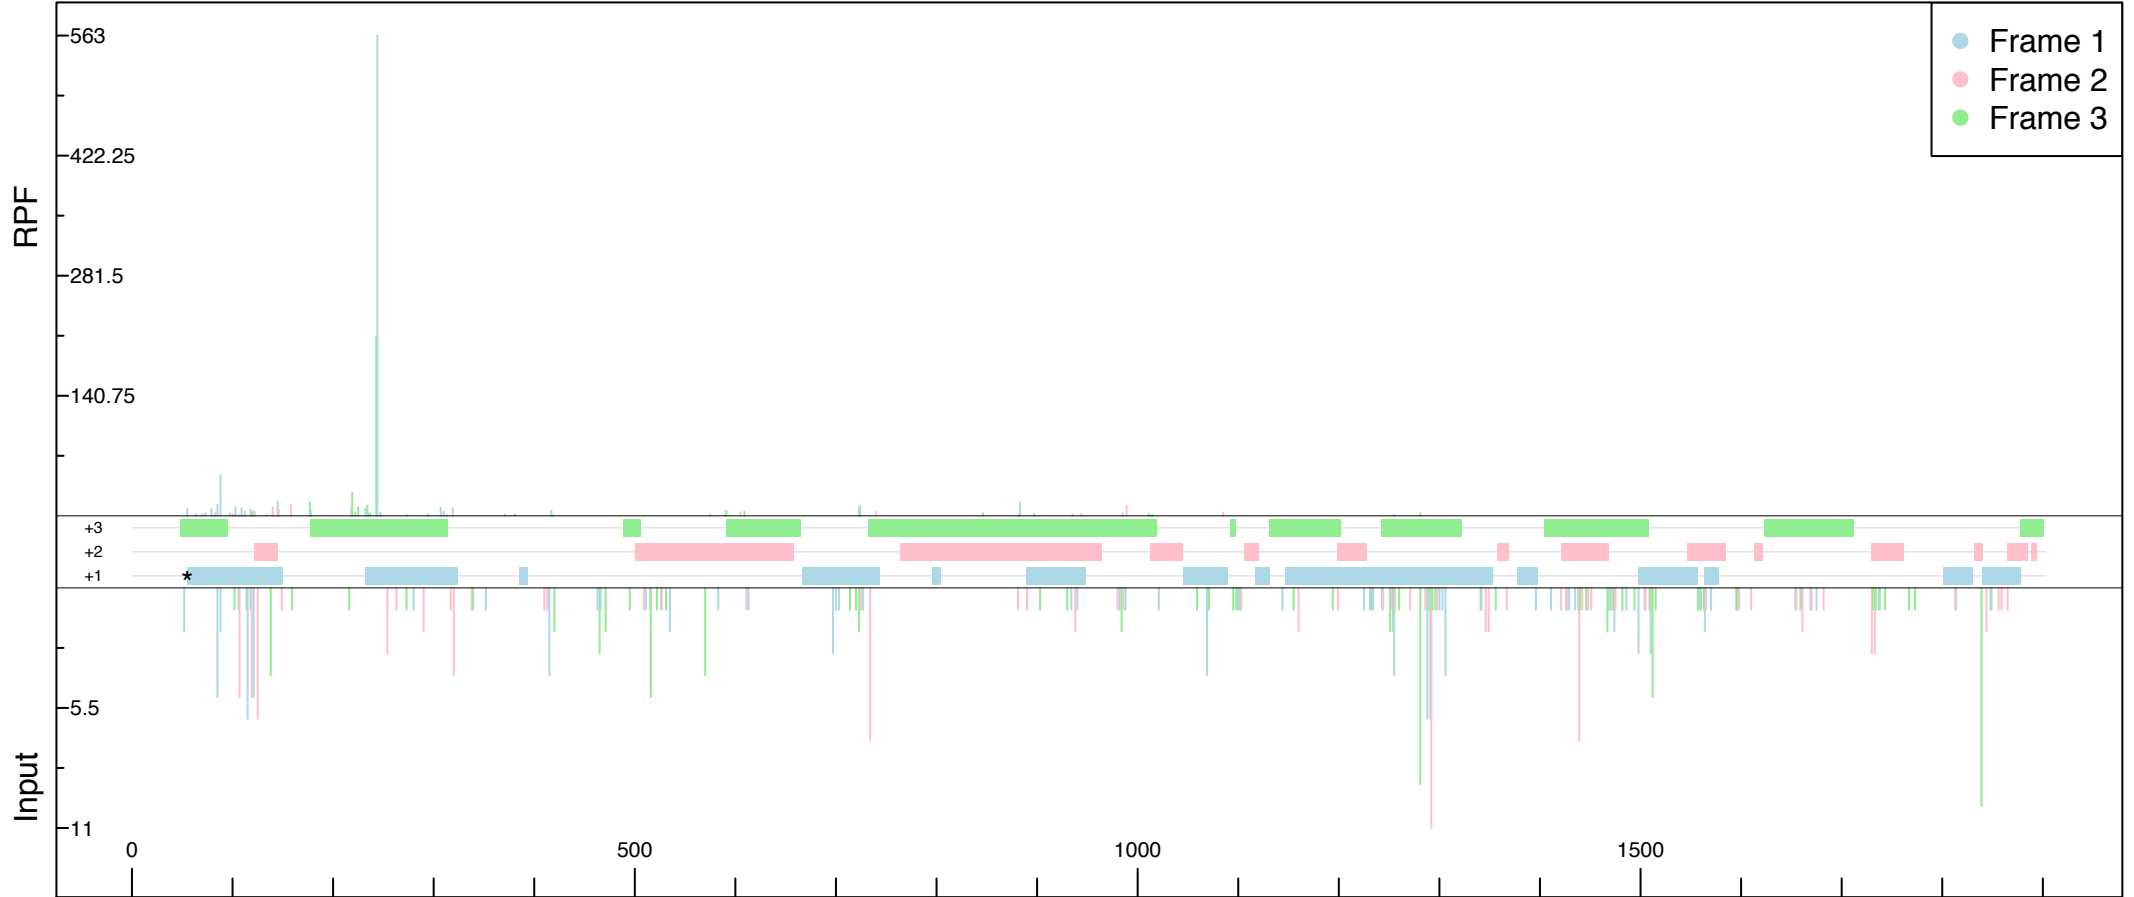

\*MDLKDAKKLEYAREDEAQTFAENEVD EEA VV

ENSDART00000133088, Global

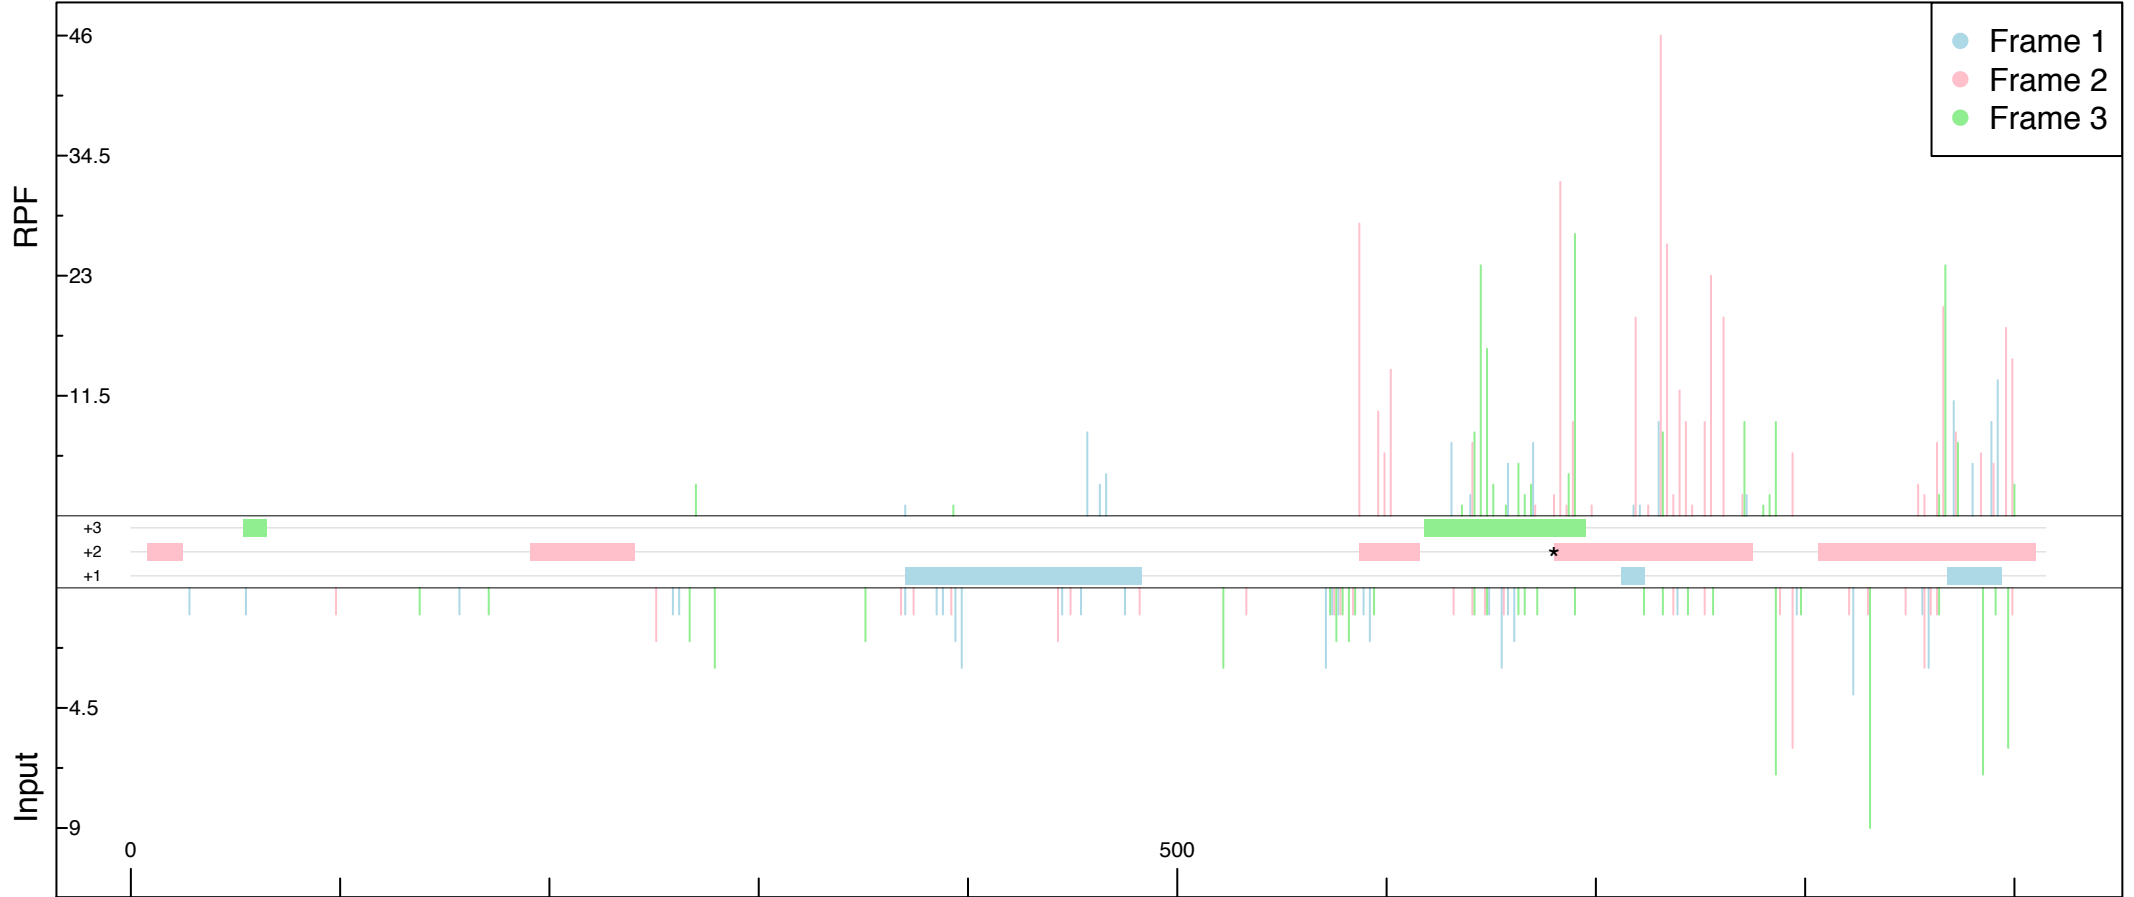

\*MDNCVKIKLKECNLEELIPTFEAQERTFPRF

ENSDART00000132074, Global

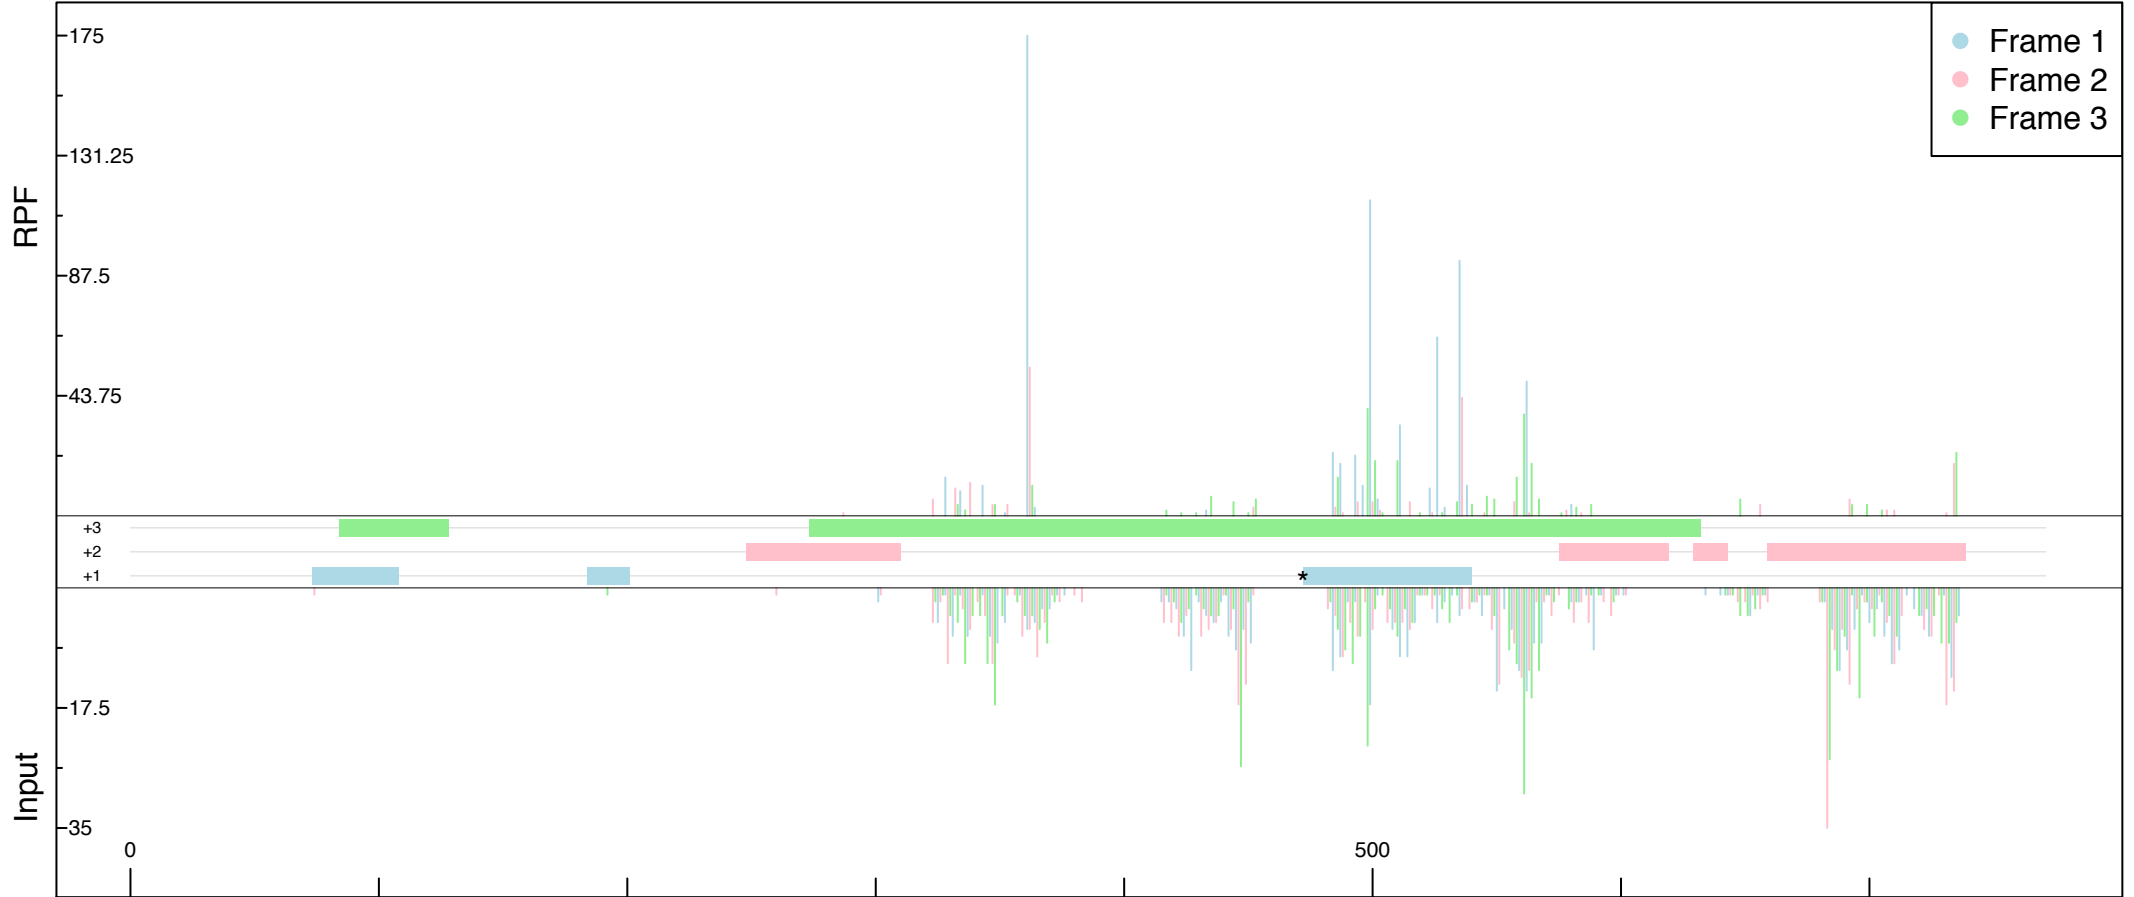

\*MMA PVW TYRCPRLQVSIKTVYI

ENSDART00000136513, Global

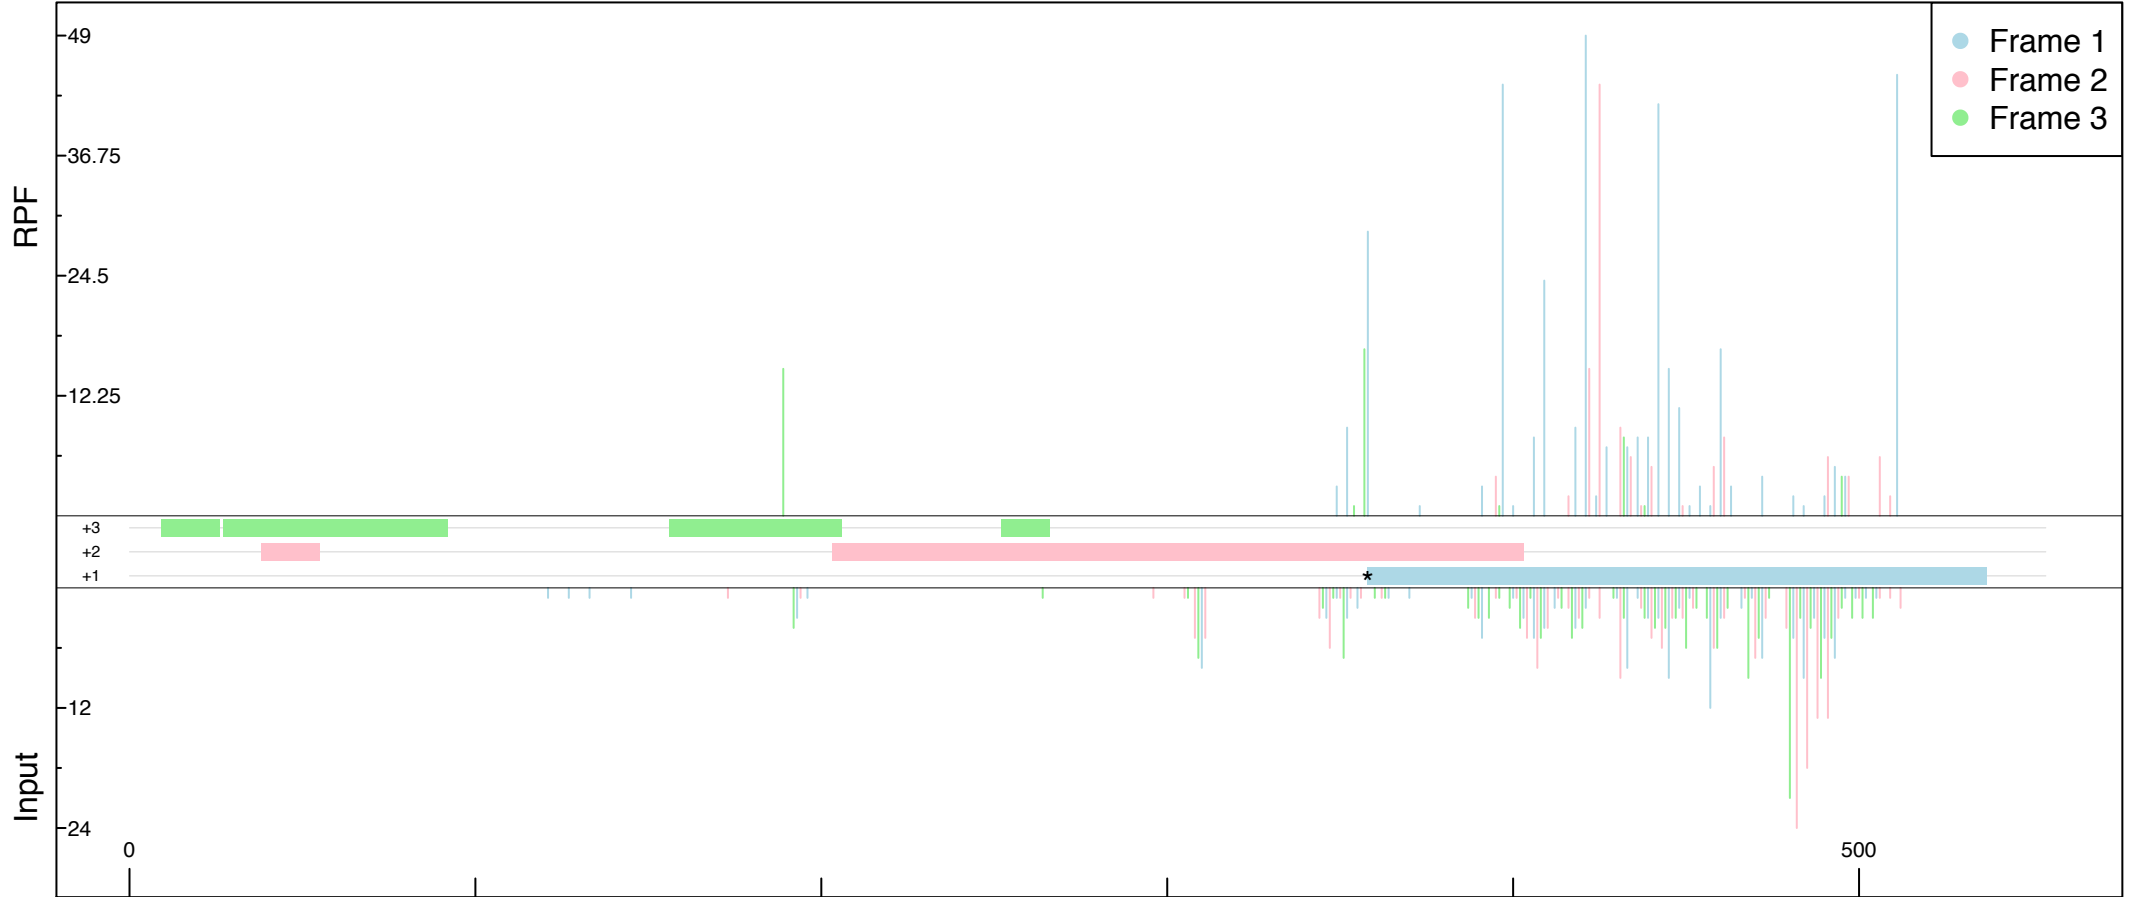

\*MGPHLGFTTDFGSLKLYAEDAFCTLEFKGRVADTICLSVLETRGEAVFKRMGLLCHM



ENSDART00000136248, Global

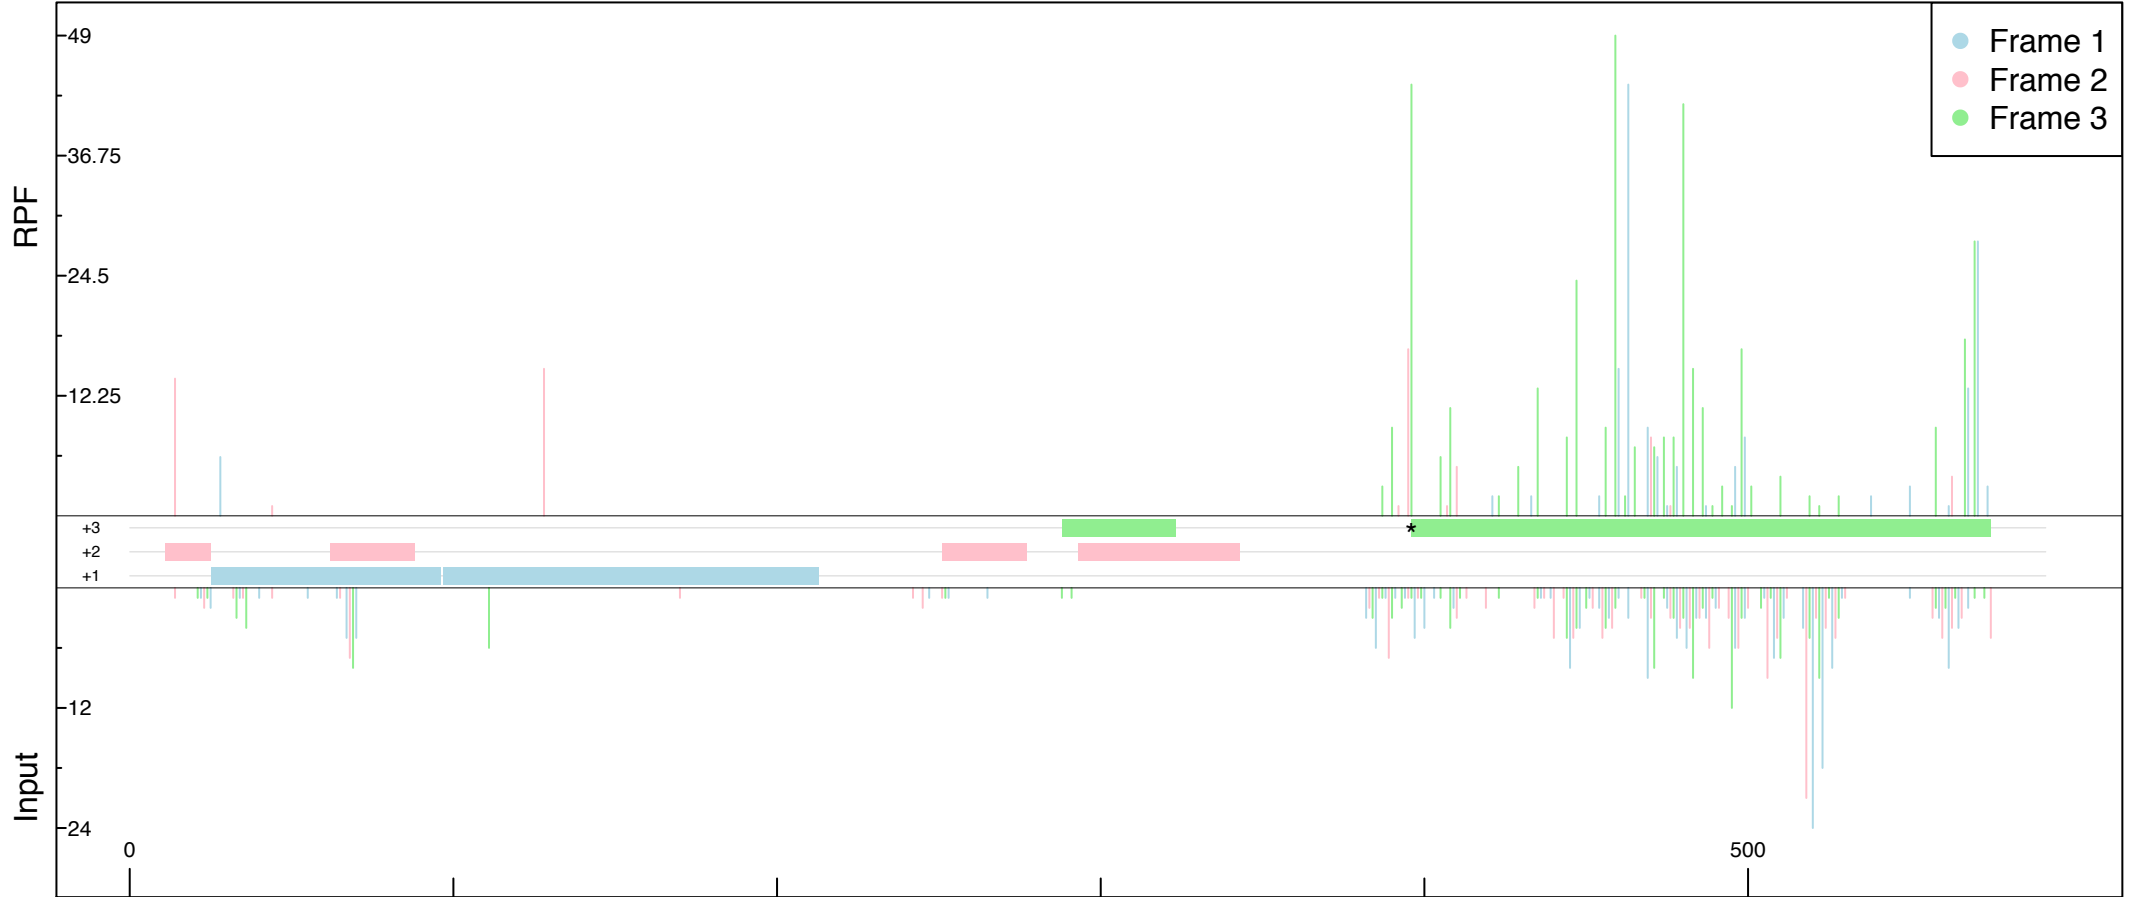

\*MGPLDFTTDFESGLKLYAEDAFCTLEFKGRVADTICLSVLETRGEAVYKRMGLLYHM

linc-ca2, Global

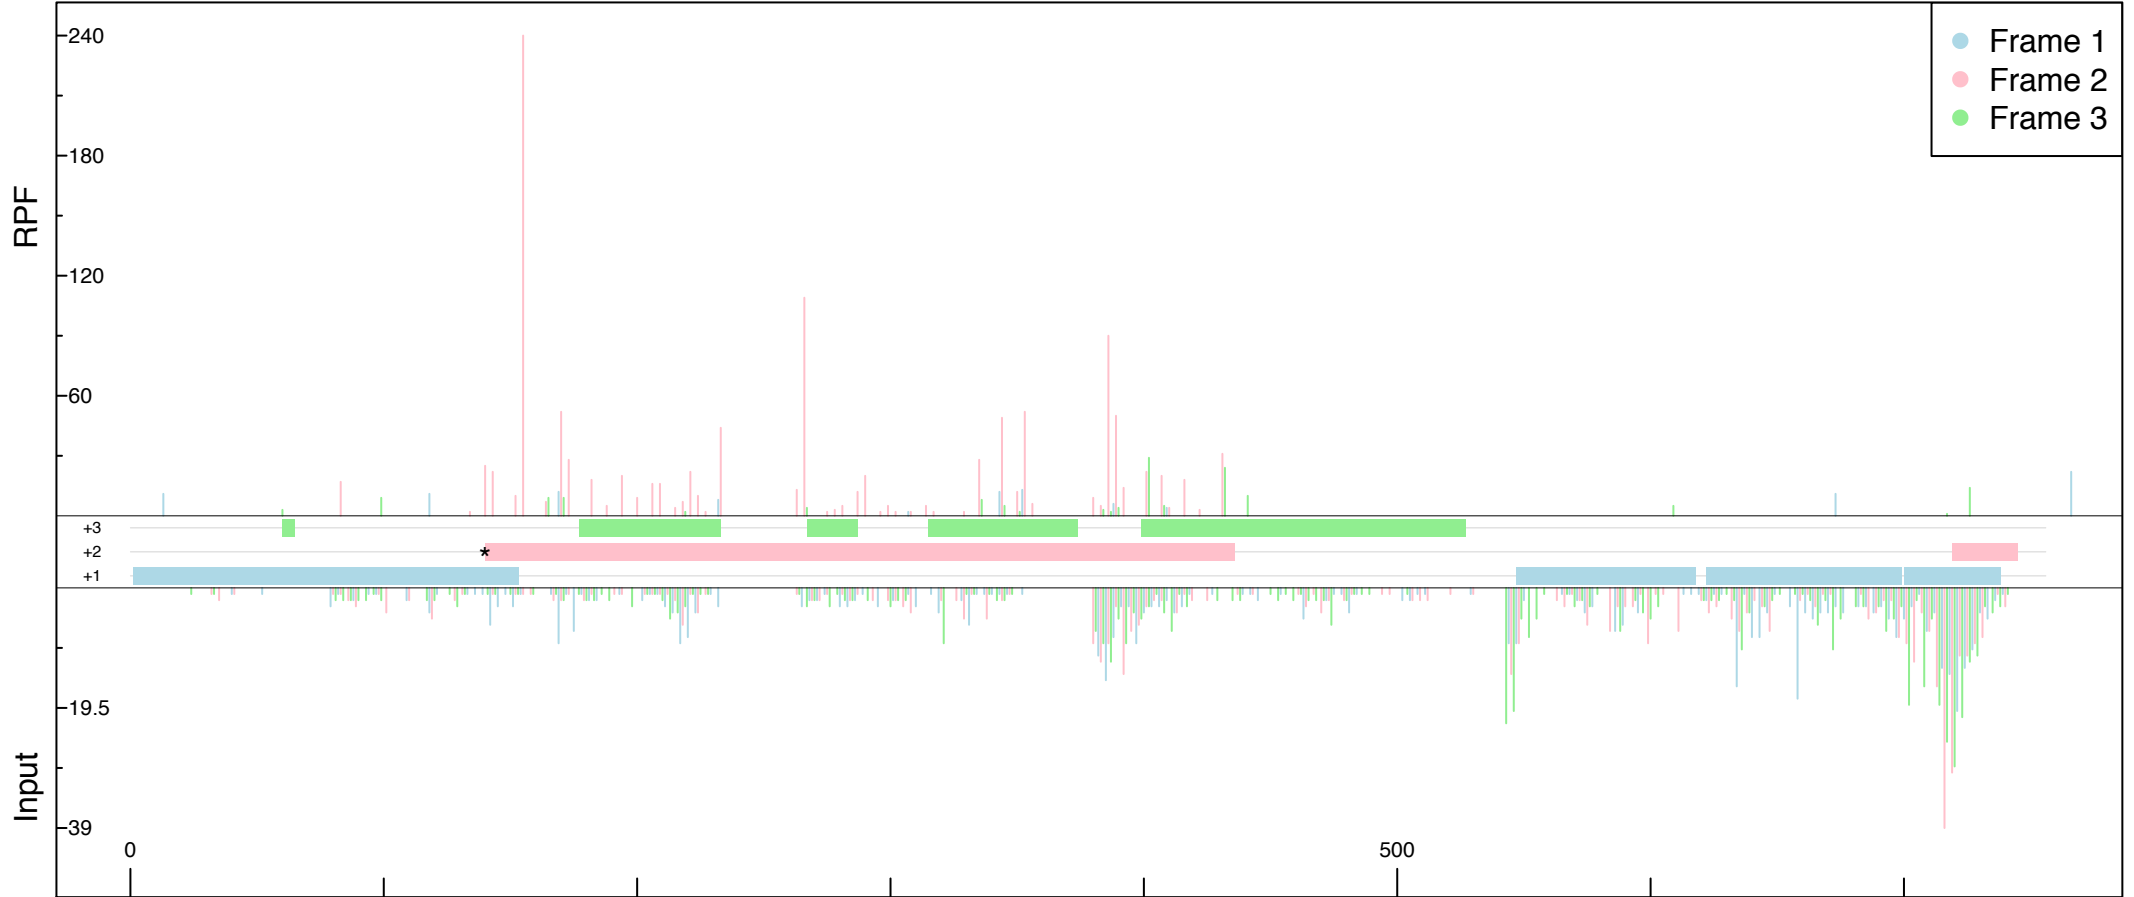

\*MGKKNKQKGGKQPNVFQVANKQSKPKTKAKPVKSSLKHINTVRNEKVESLNQMFTPLQQDVKSLSKSTKSEIKKAQKVVRDAPKEPVNVYSAAQLFSQL

ENSDART00000129853, Global

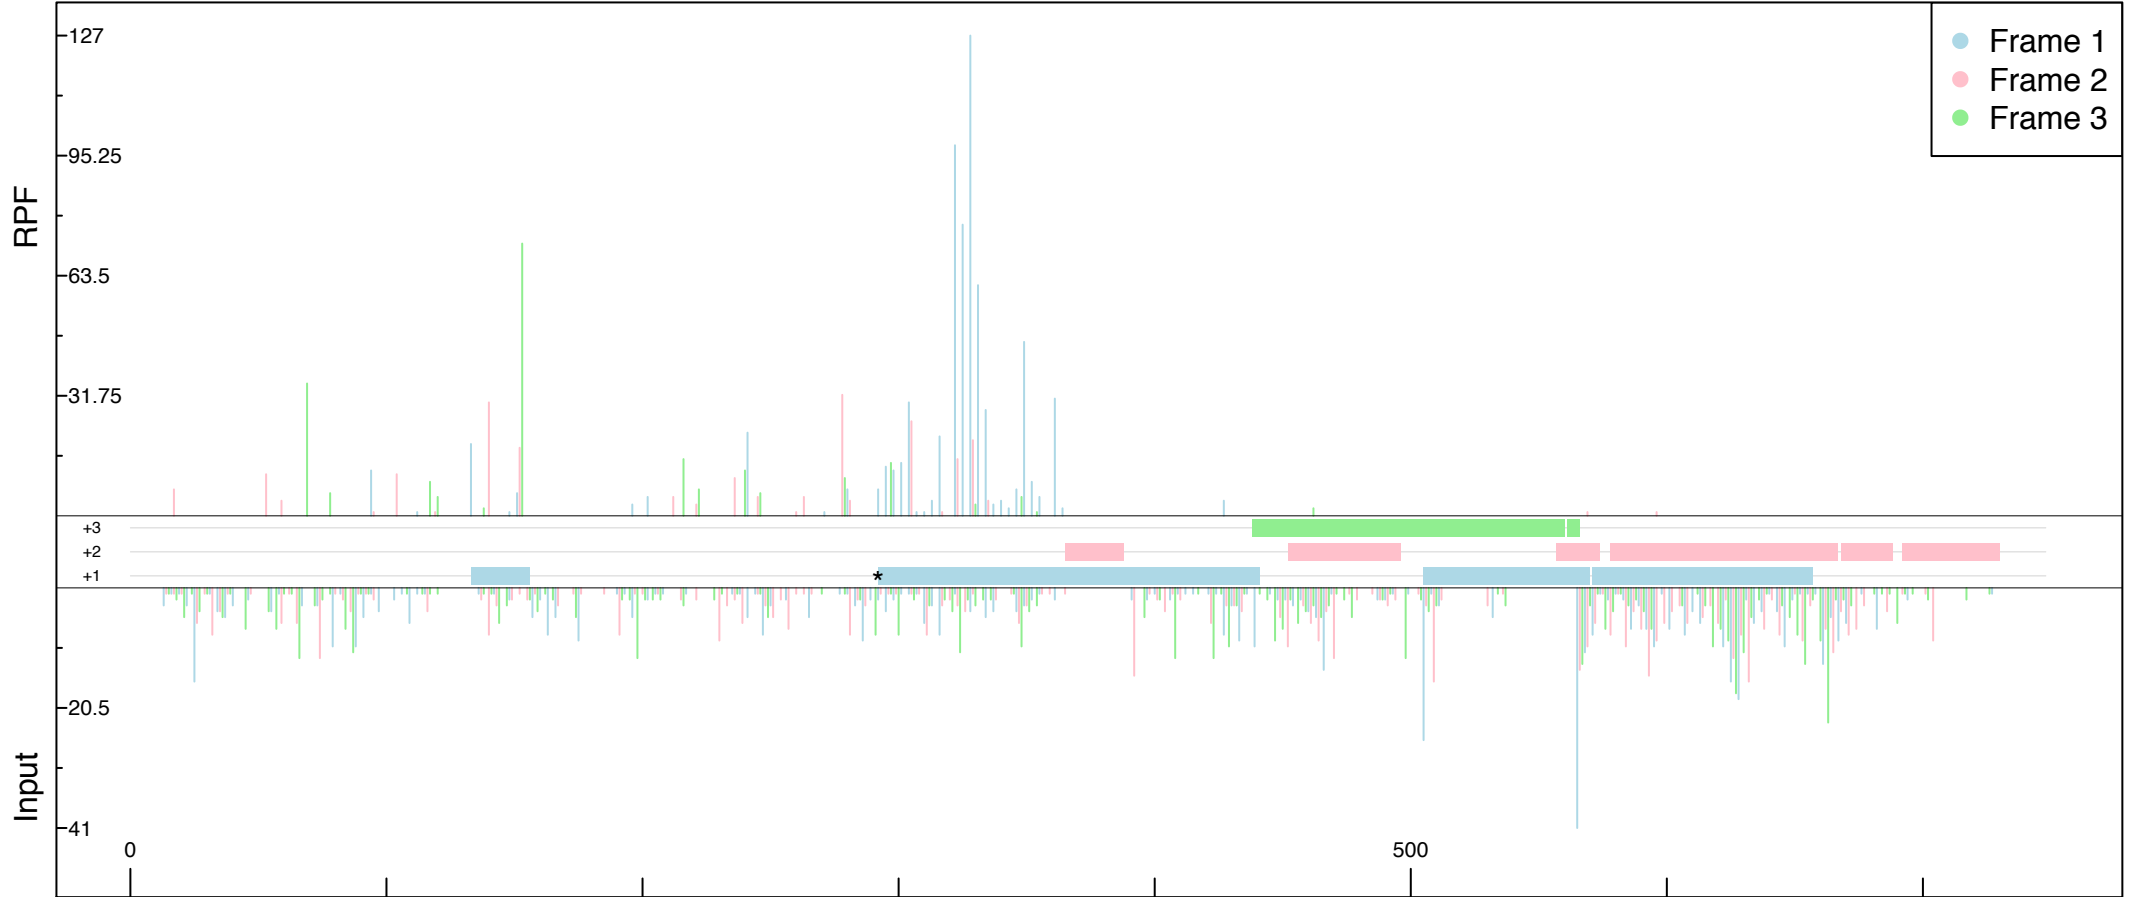

\*MRFHPLYLLLLLLTVLVLISADKHGTKHGFMMMLRASIKKNQRPALDWK

ENSDART00000138385, Global

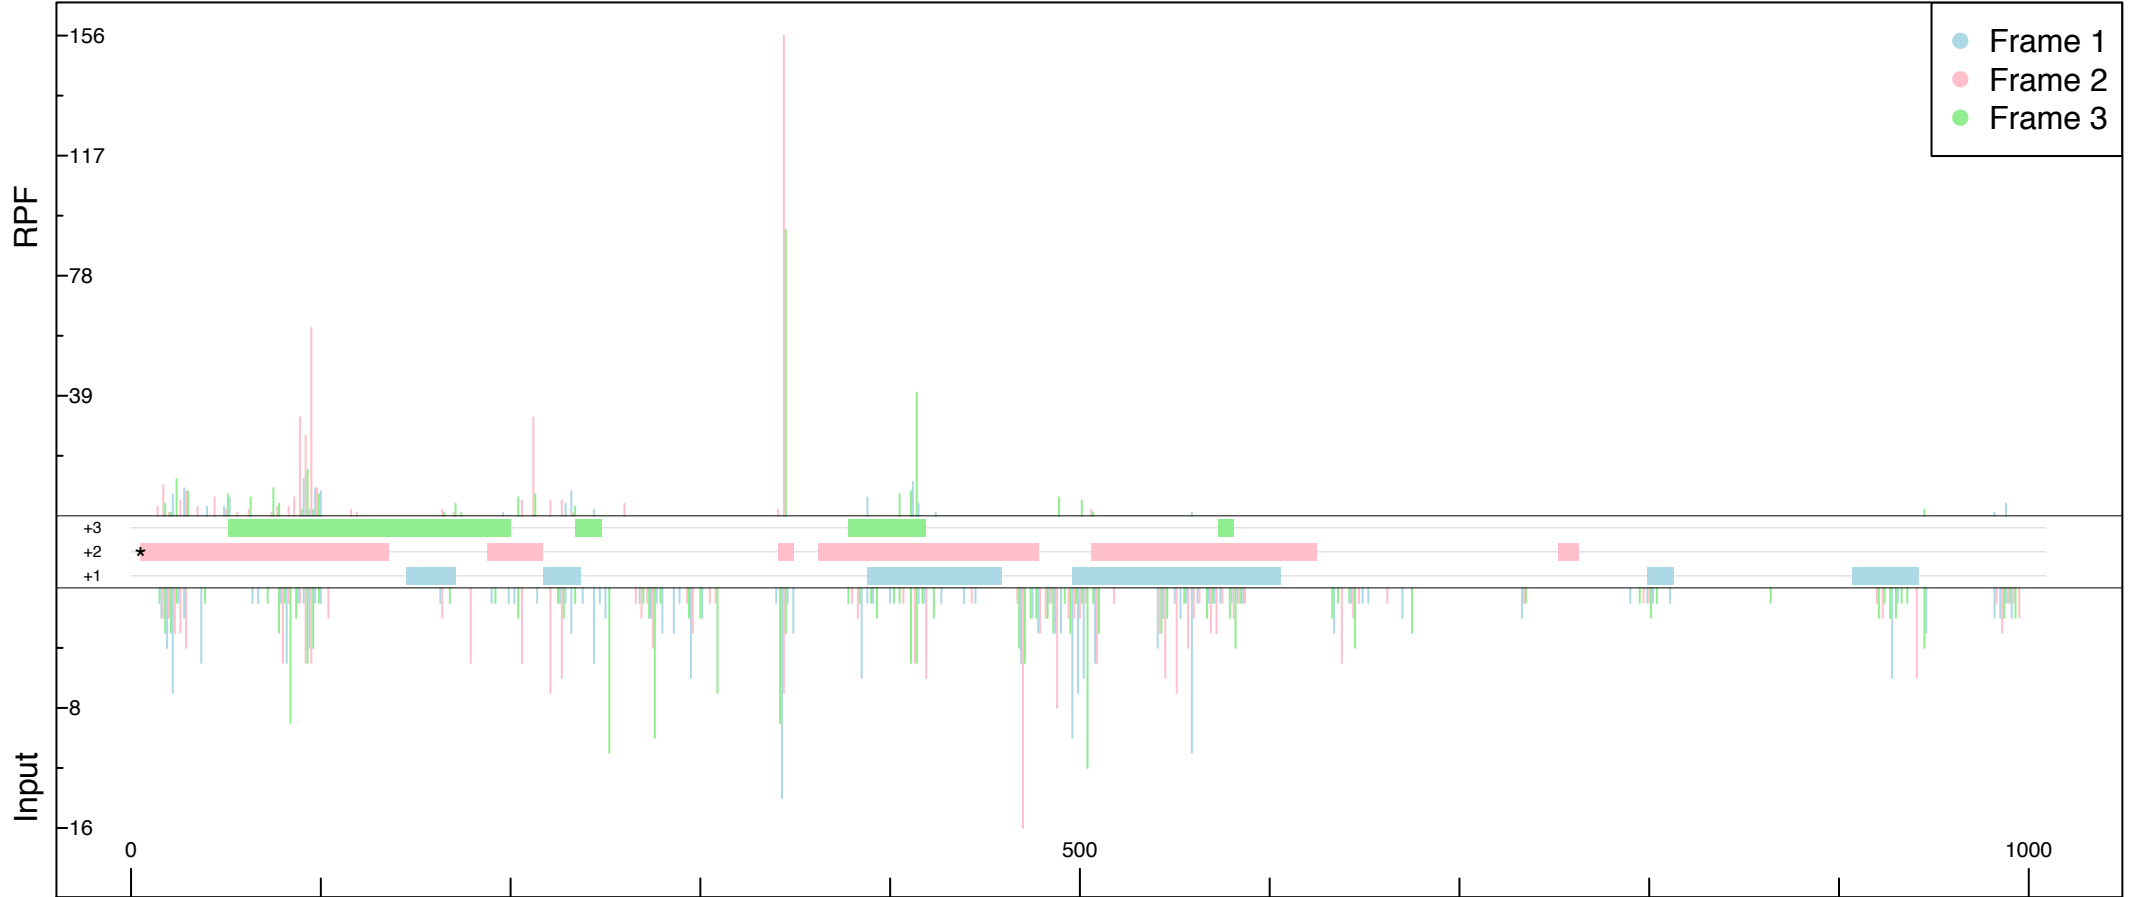

\*MKITVQIENVHKAFPNVDTQVYSSTSKVPYLAETVDYPEHHQ

# linc-chd2, Global

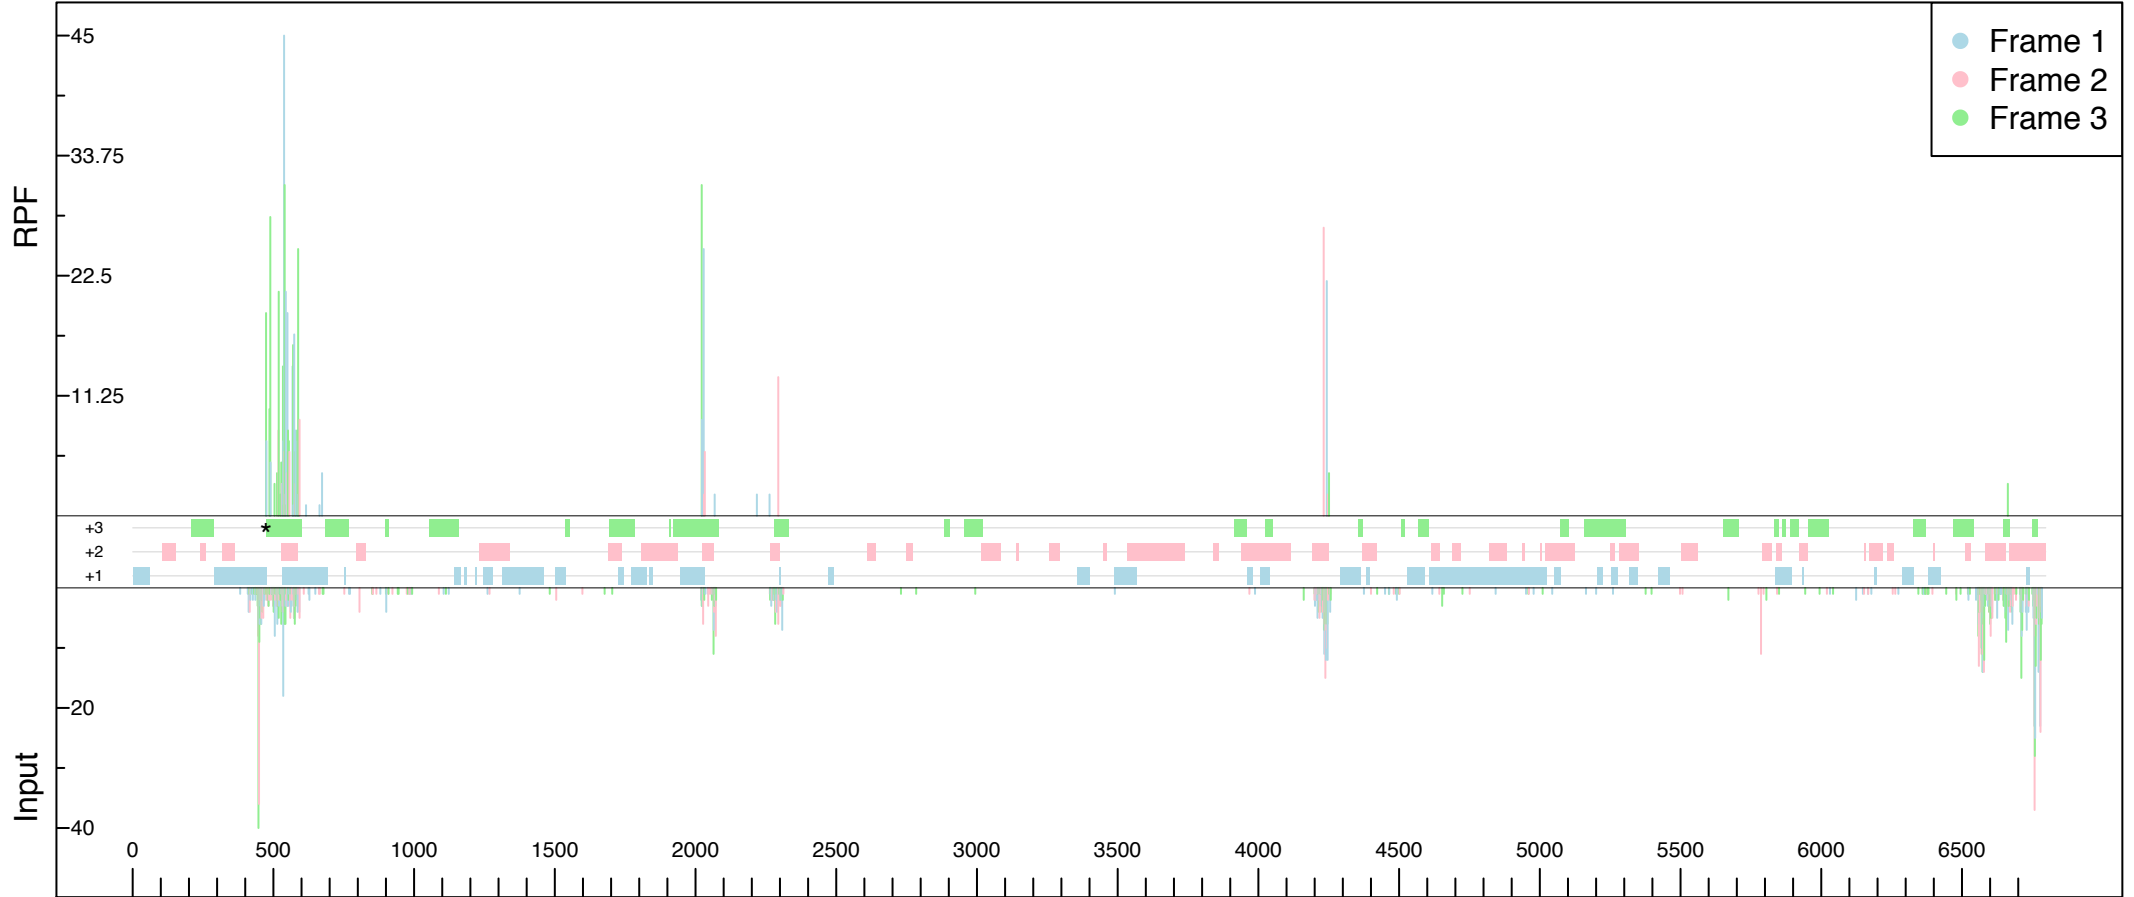

\*MWSGGAEQQHPKTDKSHRCNGVDSSRRKNRSQRWRYGKISL

ENSDART00000138787, Global

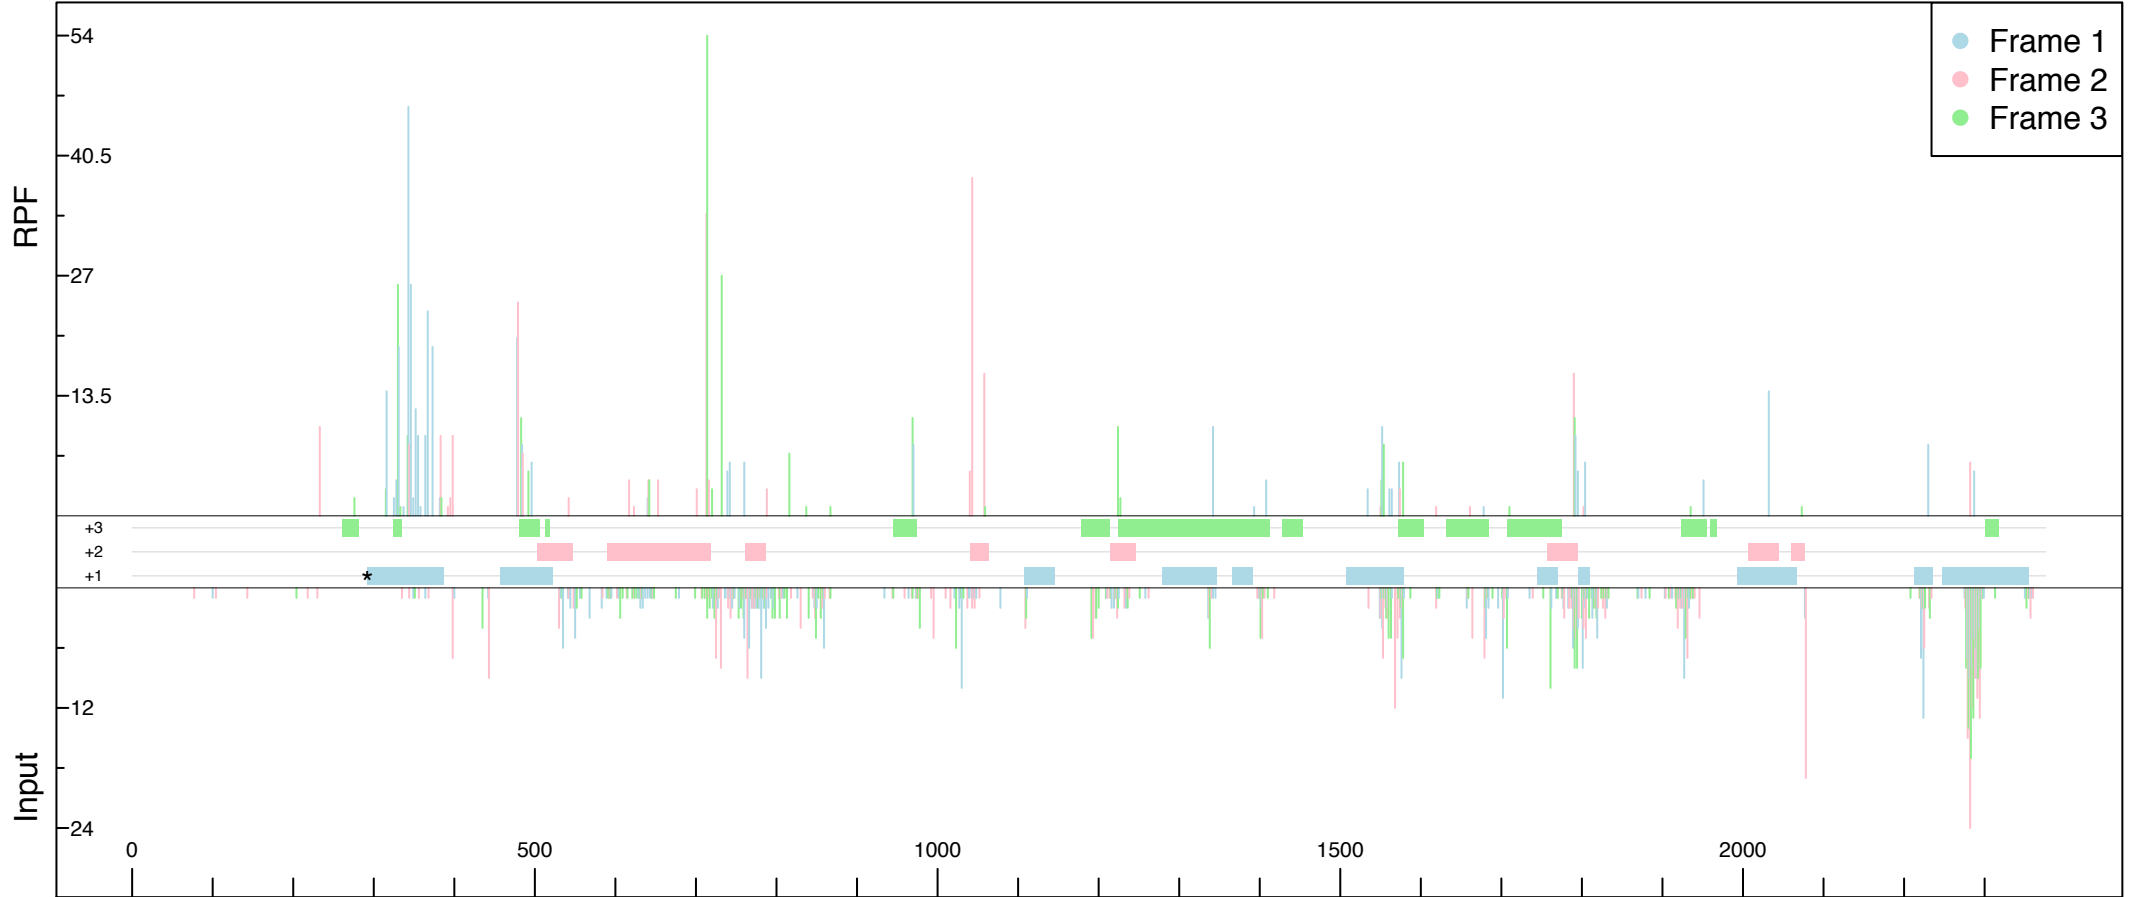

\*MDNYVKIKLKECNLEELIPTFEAQERTFPRF

ENSDART00000133786, Global

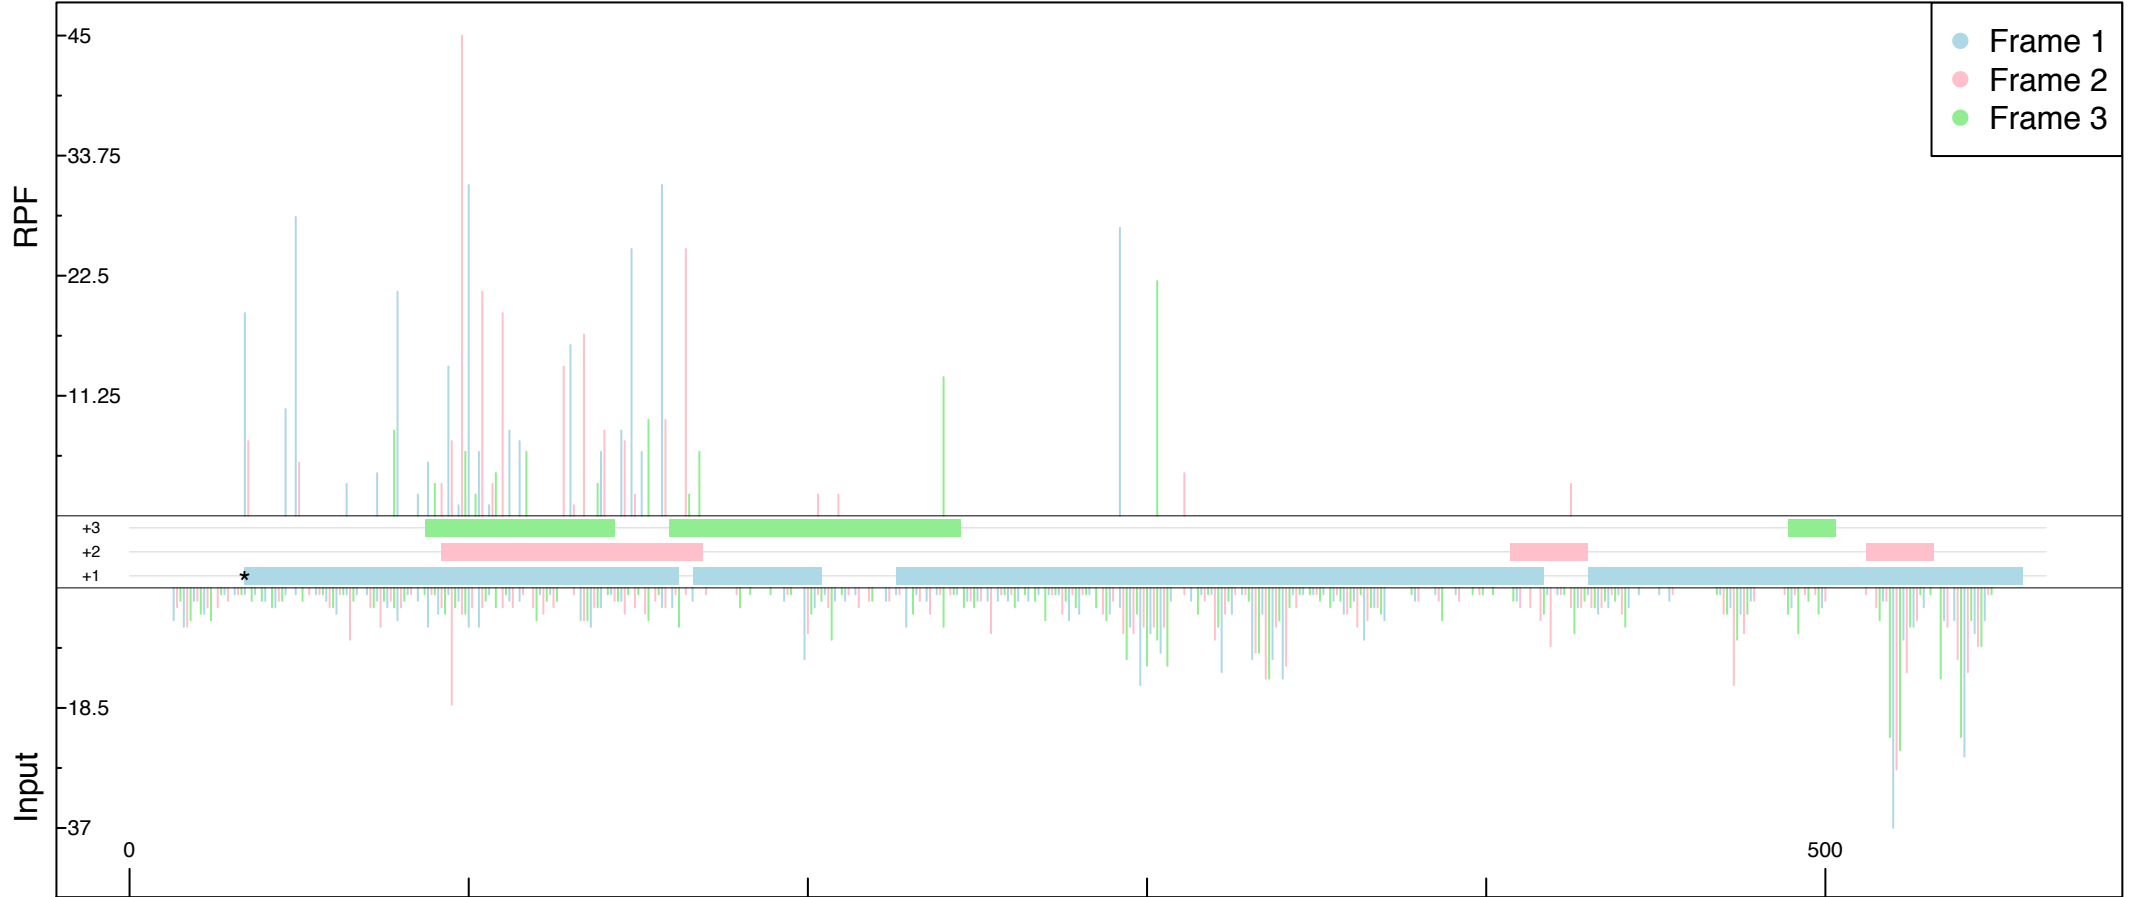

\*MWSGGAEQQHPKTDKSHRCNGVDSSRRKNRSQRWRYEVKKTG

ENSDART00000133520, Global

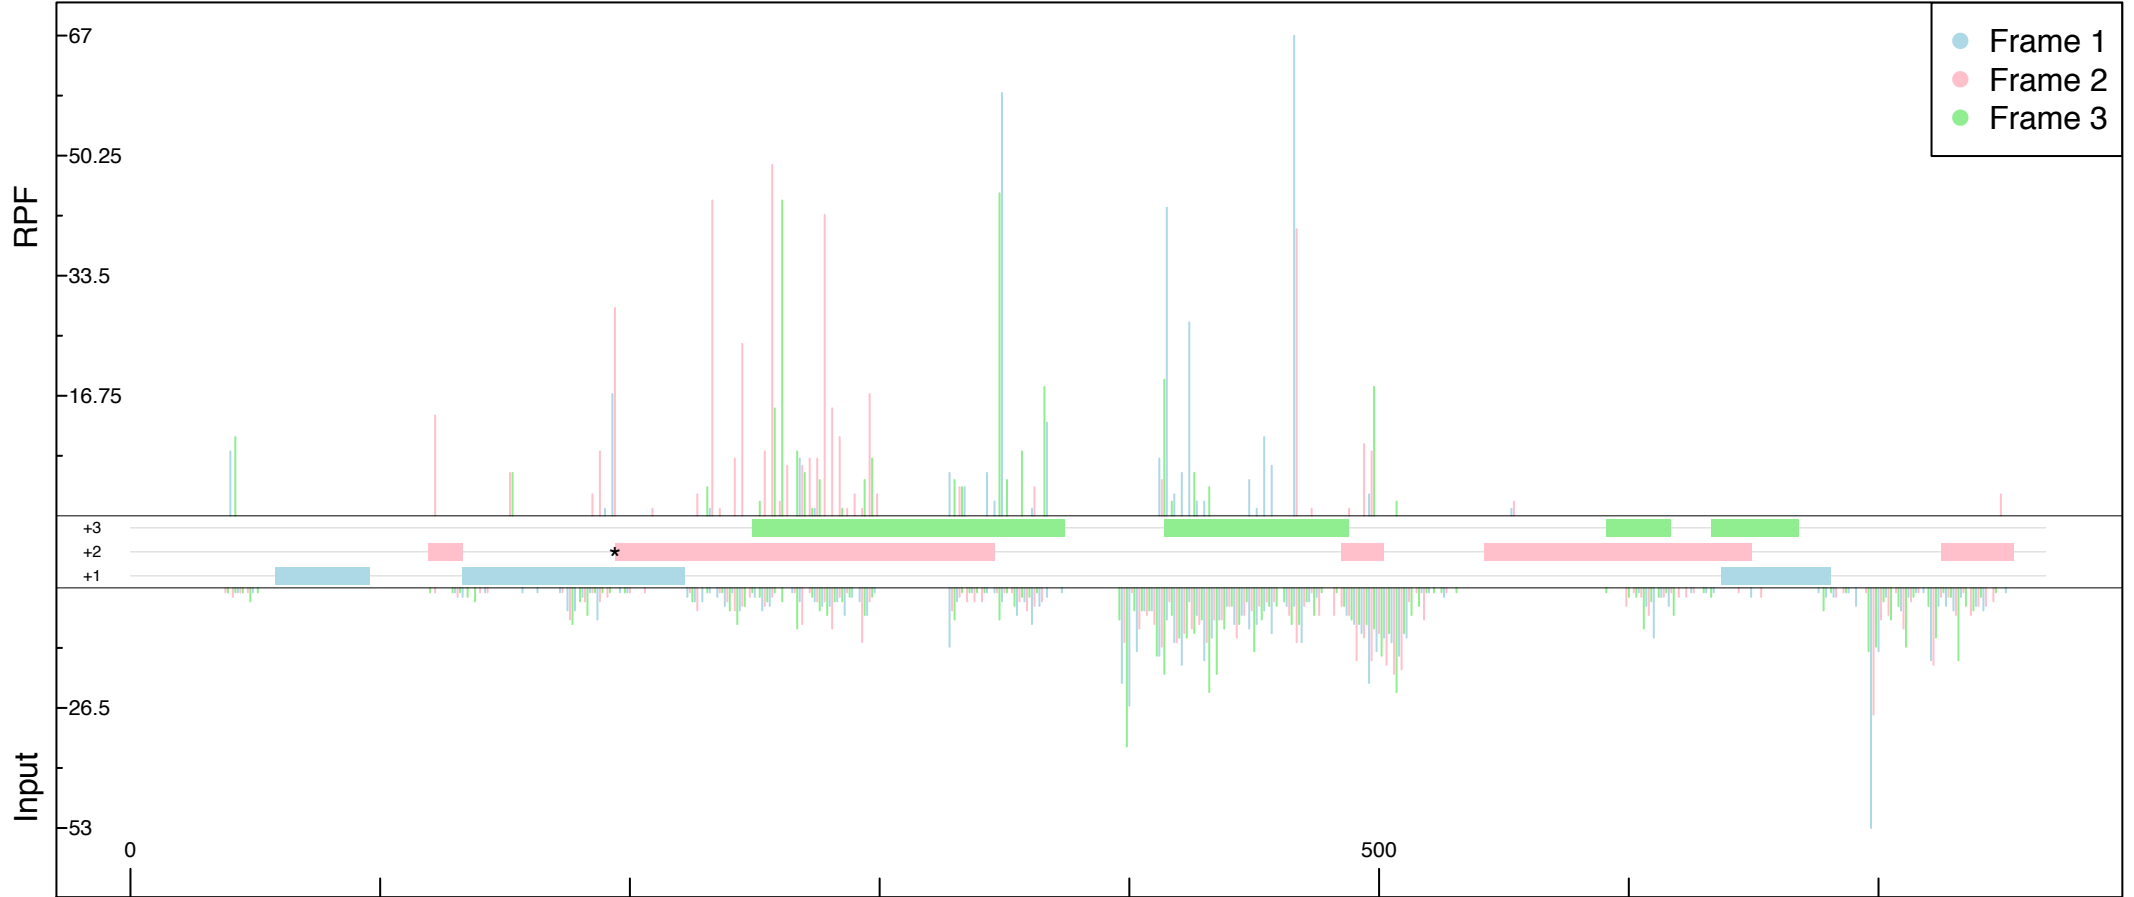

\*MGPLHGFTTDFGSLKLYAEDAFCTLEFKGRVADTICLSVAGDQRGSC



# ENSDART00000131802, Global

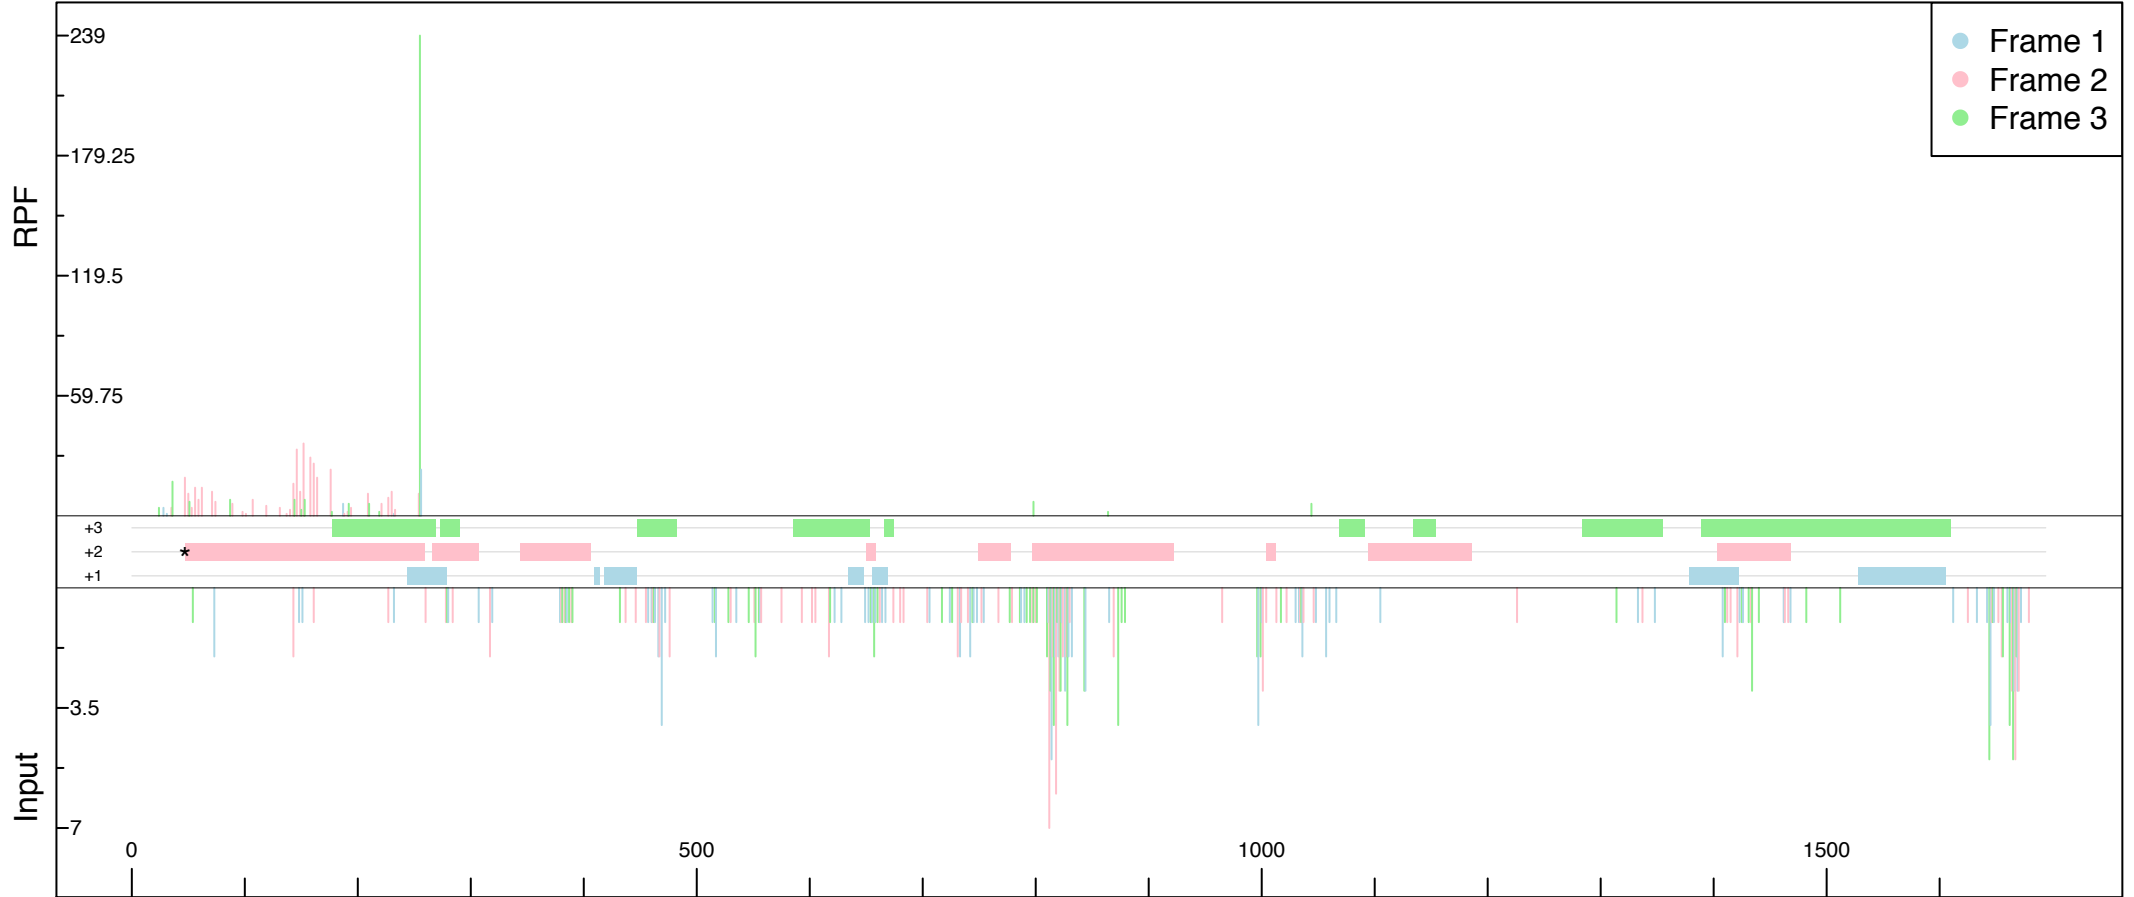

\*MSNNSTGLSSLQKSVNQLRFEASFDRIMVQAADDLKAFCLKNASKDPLIKGVPPNDNPFPAKSCVLL

# linc-btr12, Global

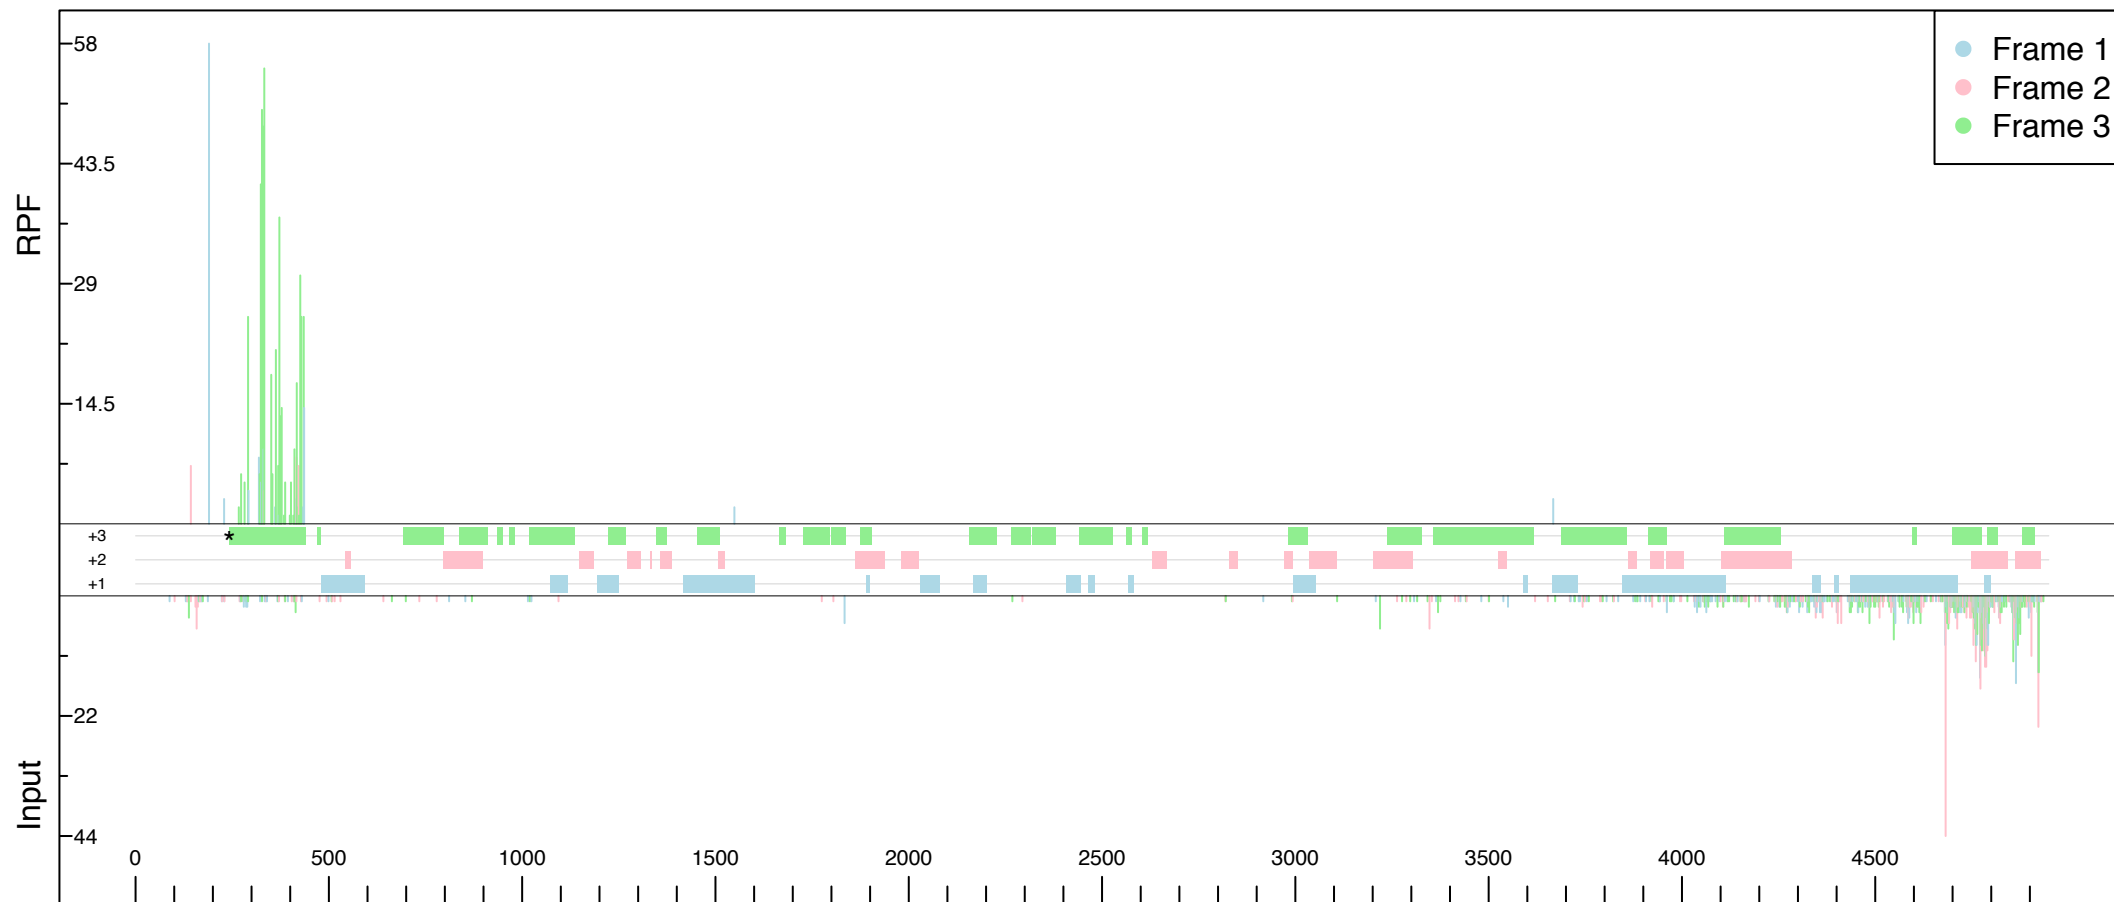

\*MSERGHGTGQANSSQTSNTDNKEKASDSAGKPEQEEEEIDIDLEAPETEKAAALAIQNQFRRFQKKKK

ENSDART00000133891, Global

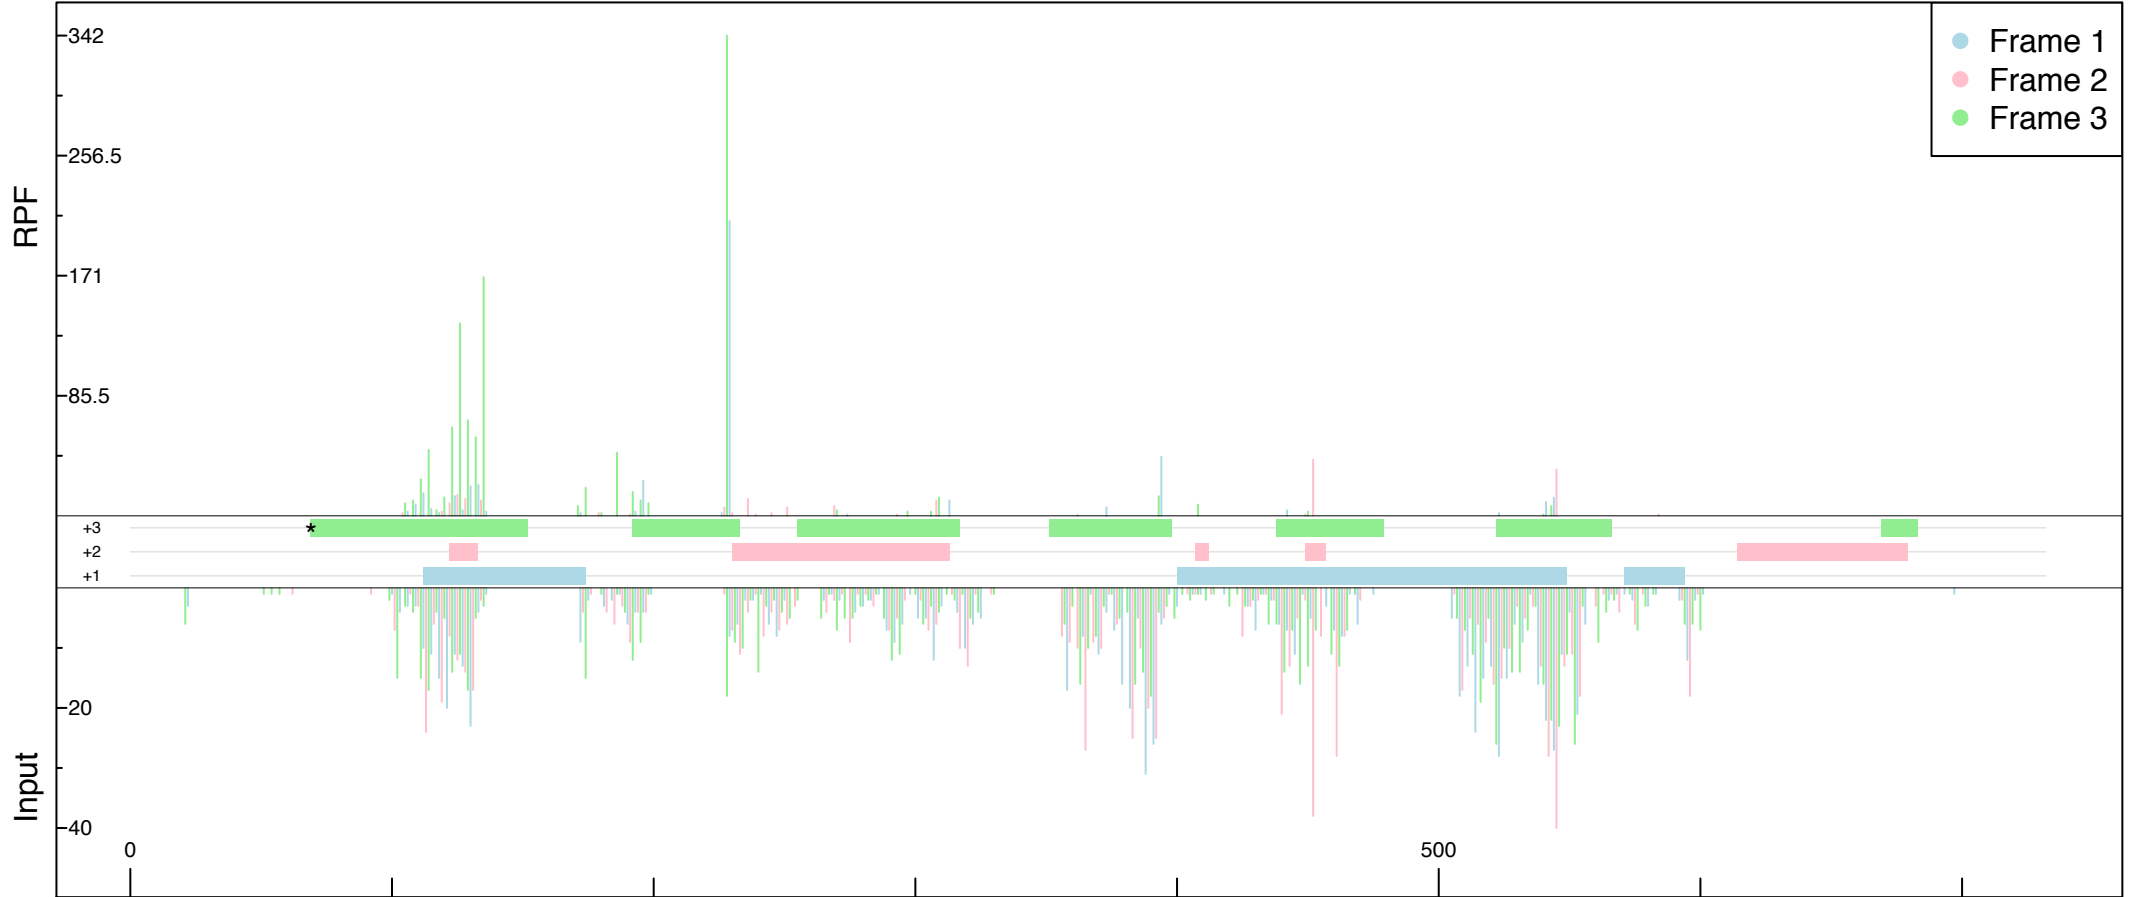

\*MAELSFTRCLRVNYGQRCANDCPDL

ENSDART00000131382, Global

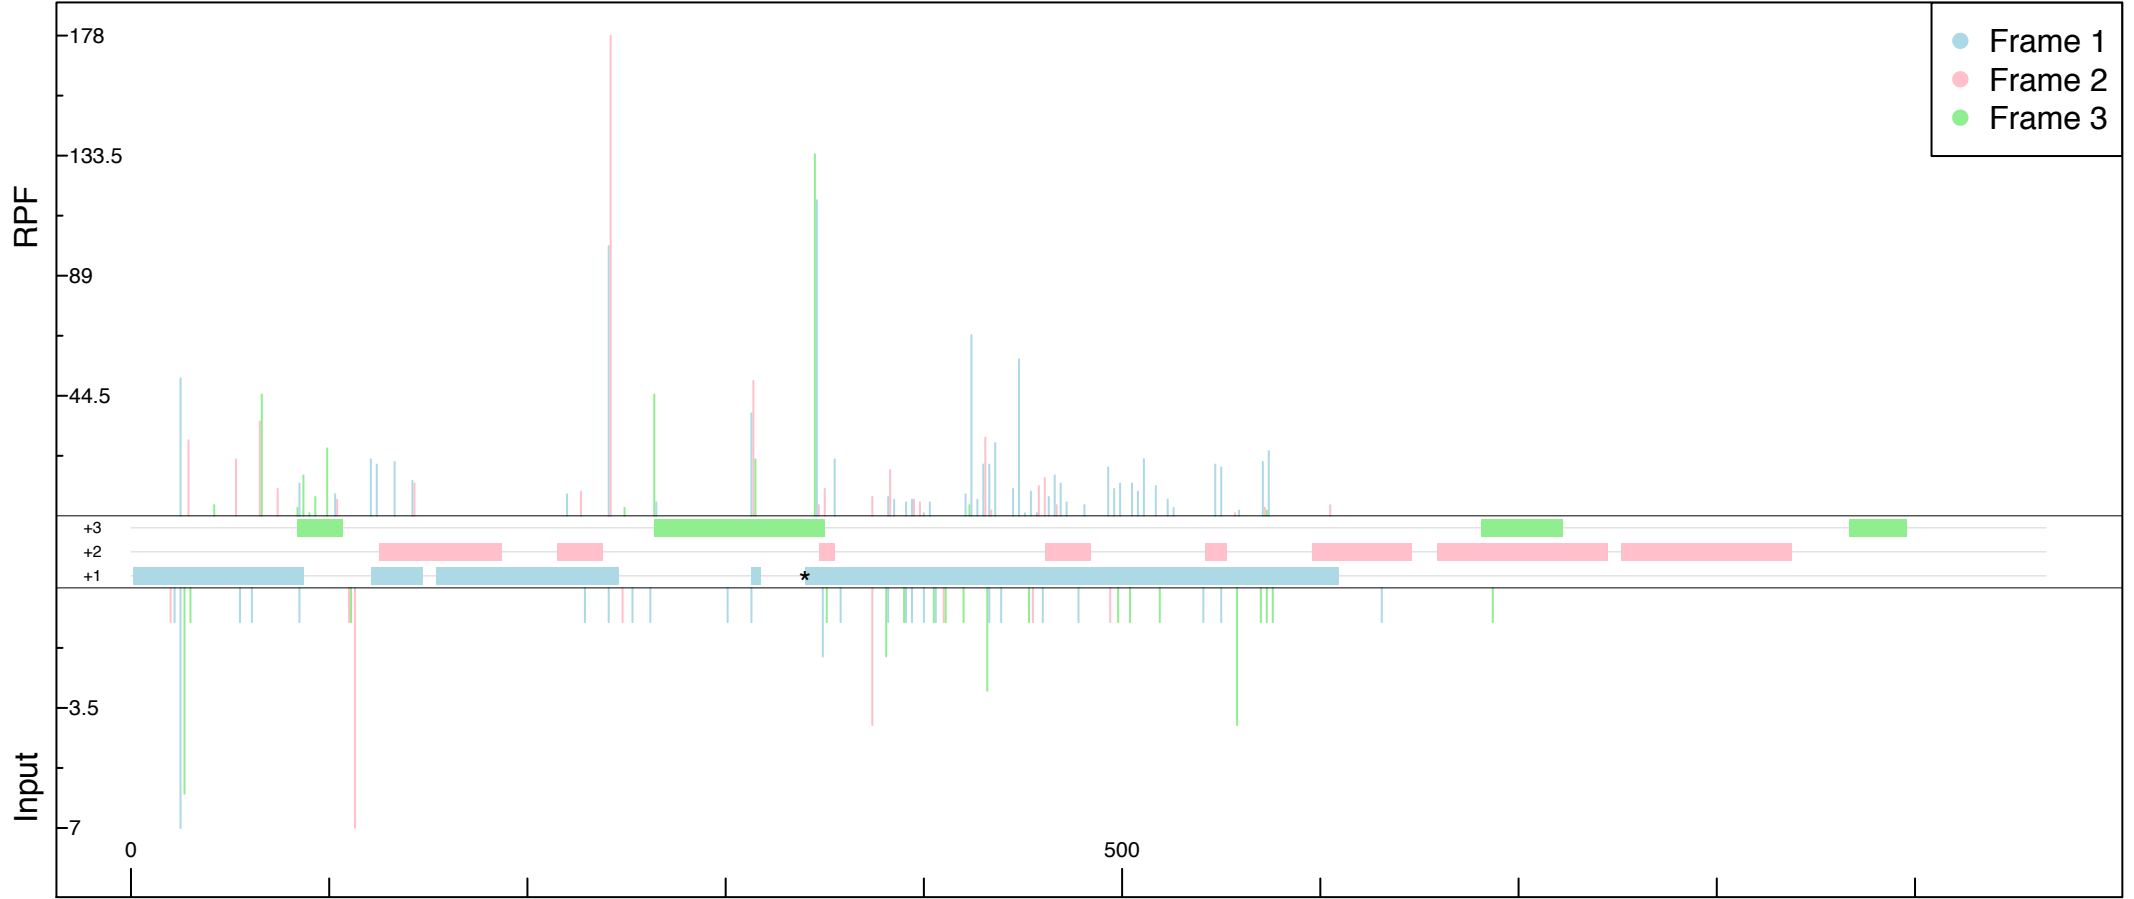

\*MTDELNELSPESIILKPEDAVPAYLNMHPIGEDVDSVDEDDMSCKVTVELLPDWLKPMEEEEVGVDELMSAGRINRRRKTKEKPYVPT

ENSDART00000133683, Global

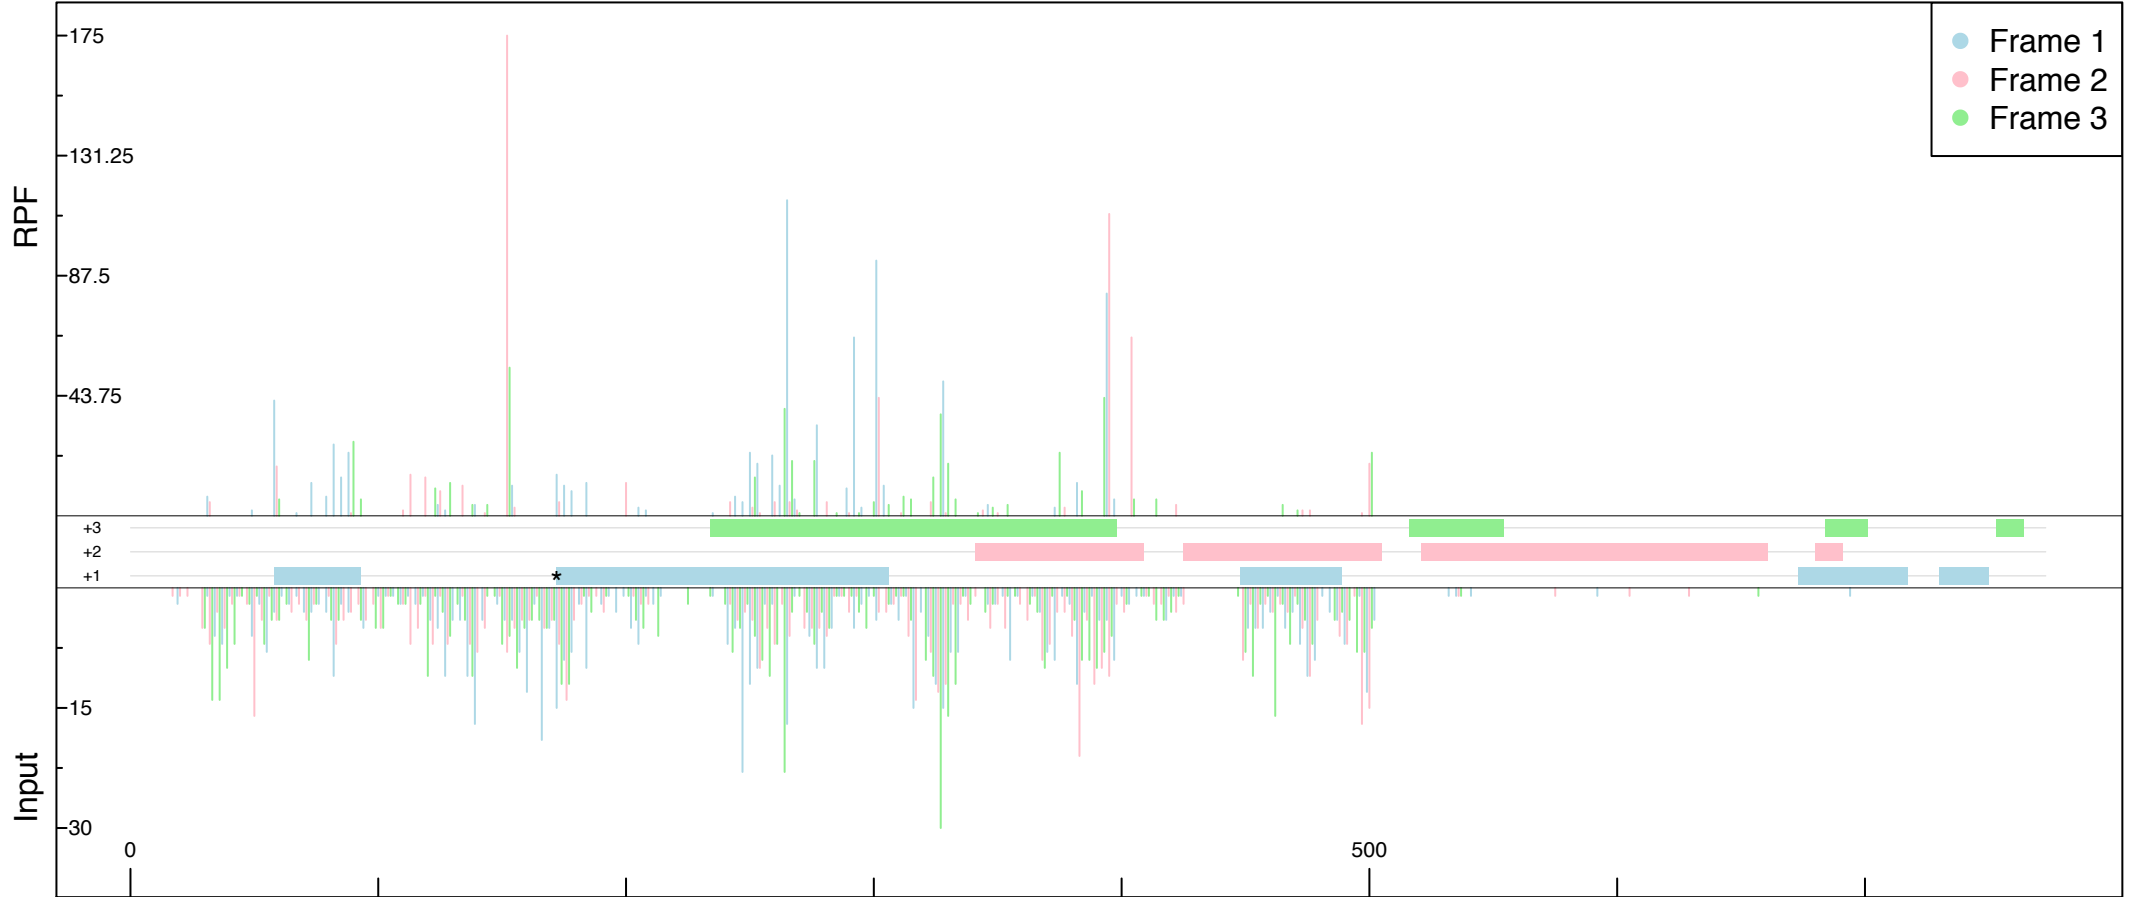

\*MRLPTGKICHQPNTVWIIIVKMMAPVWYRCPRLQVSIKTVYI

ENSDART00000132531, Global

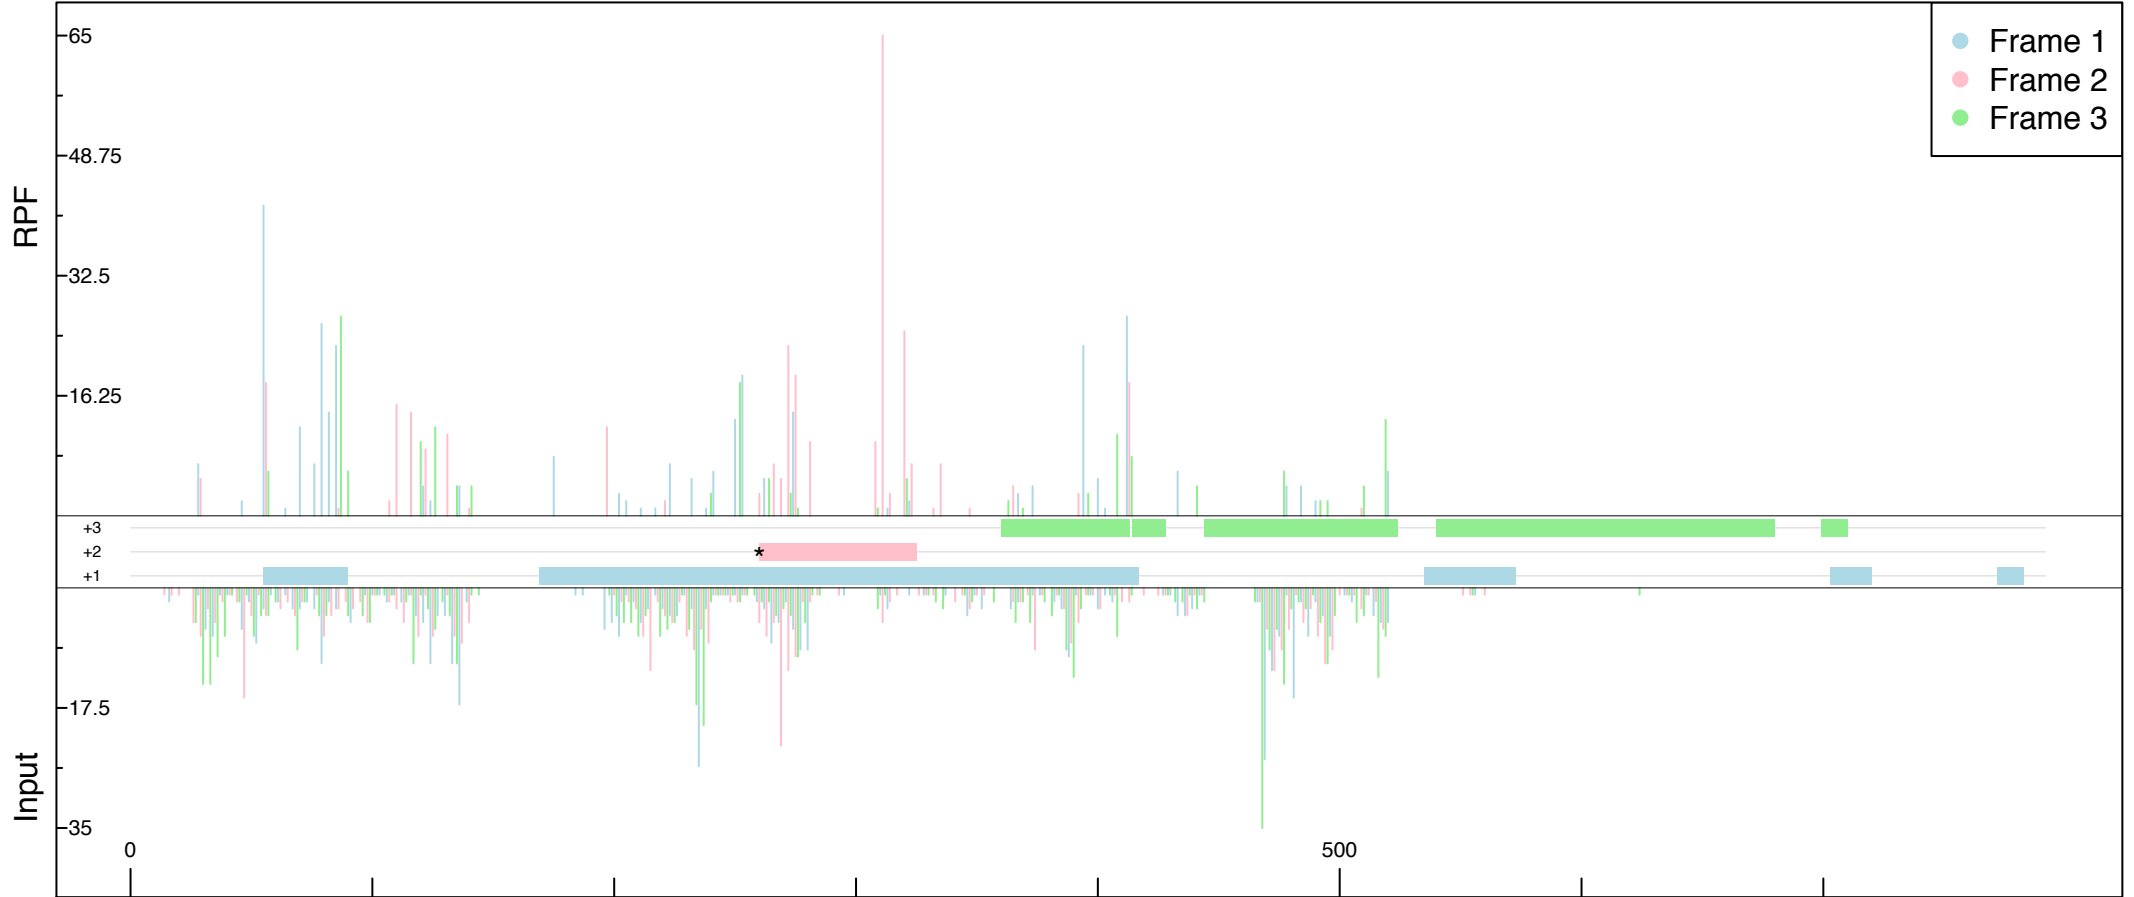

\*MMPVWTYRCPRQVSIKTVYI

ENSDART00000134430, Global

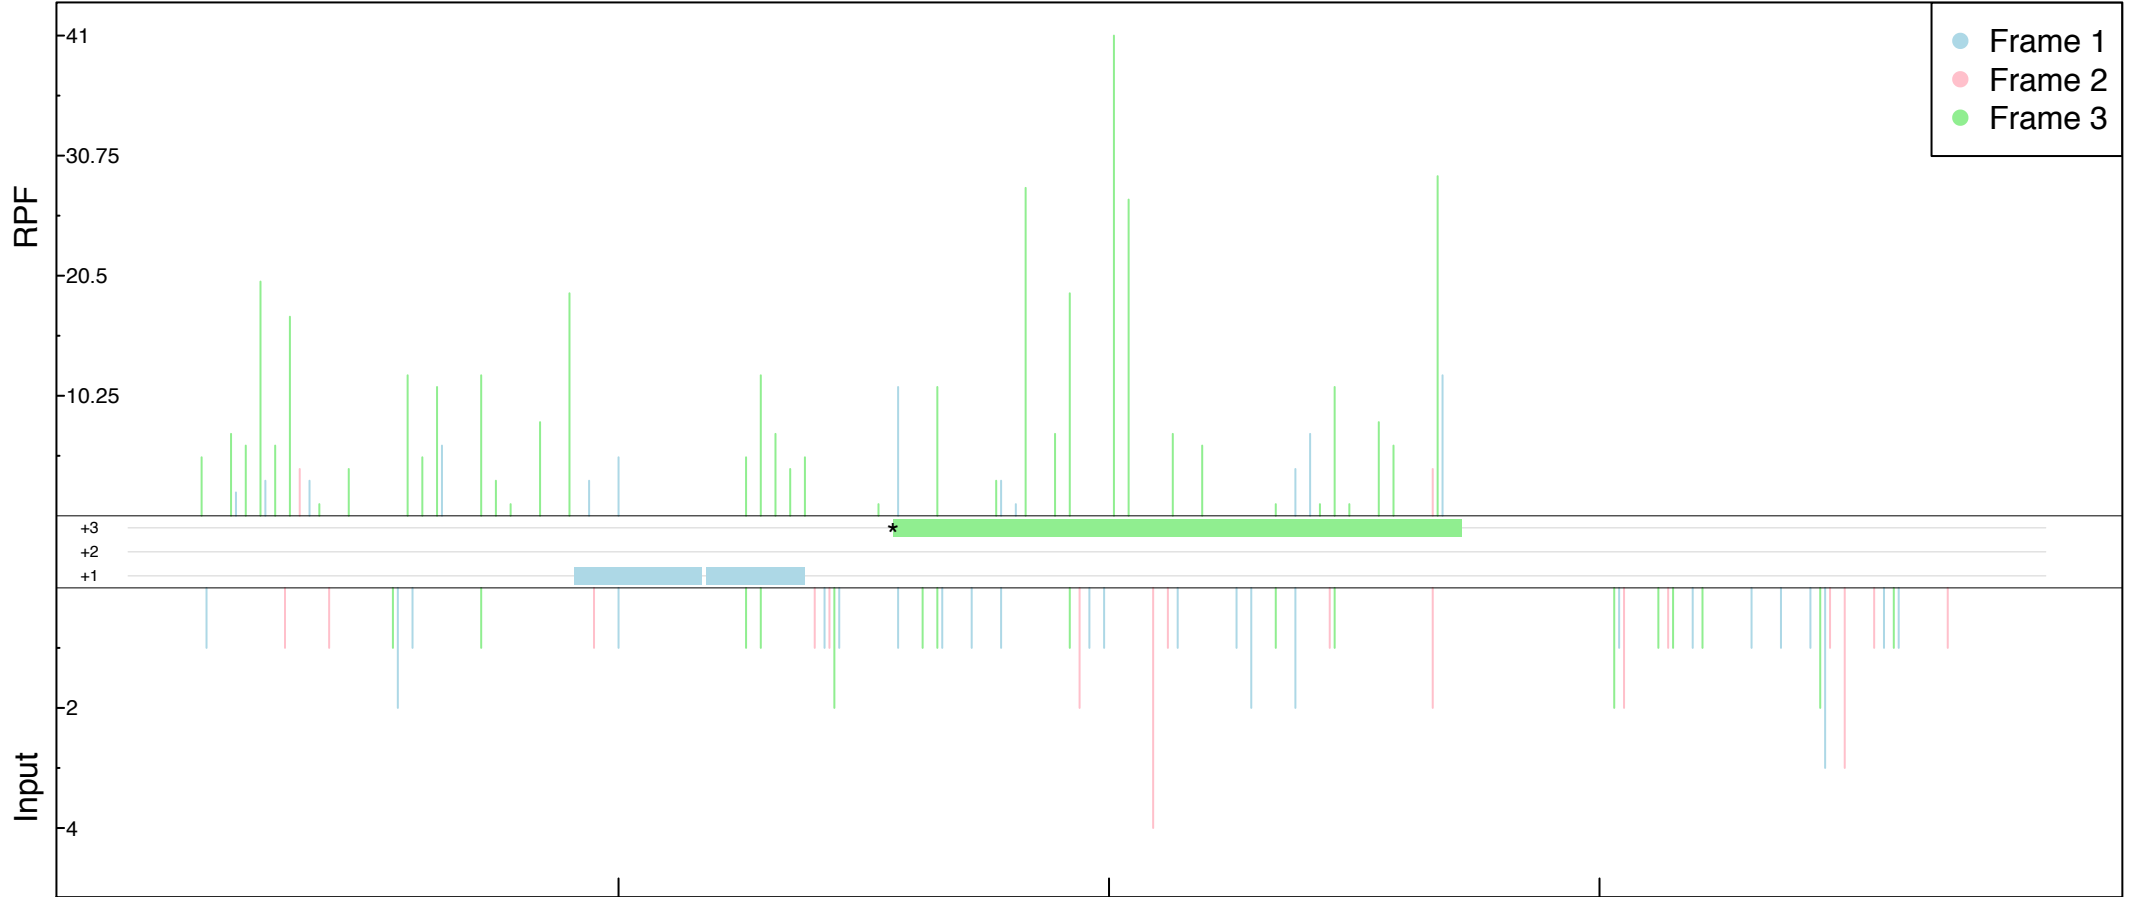

\*MRSQDRQLAQTLLGLNKEIQLRRRESGSLLEEDTENL

# ENSDART00000135170, Global

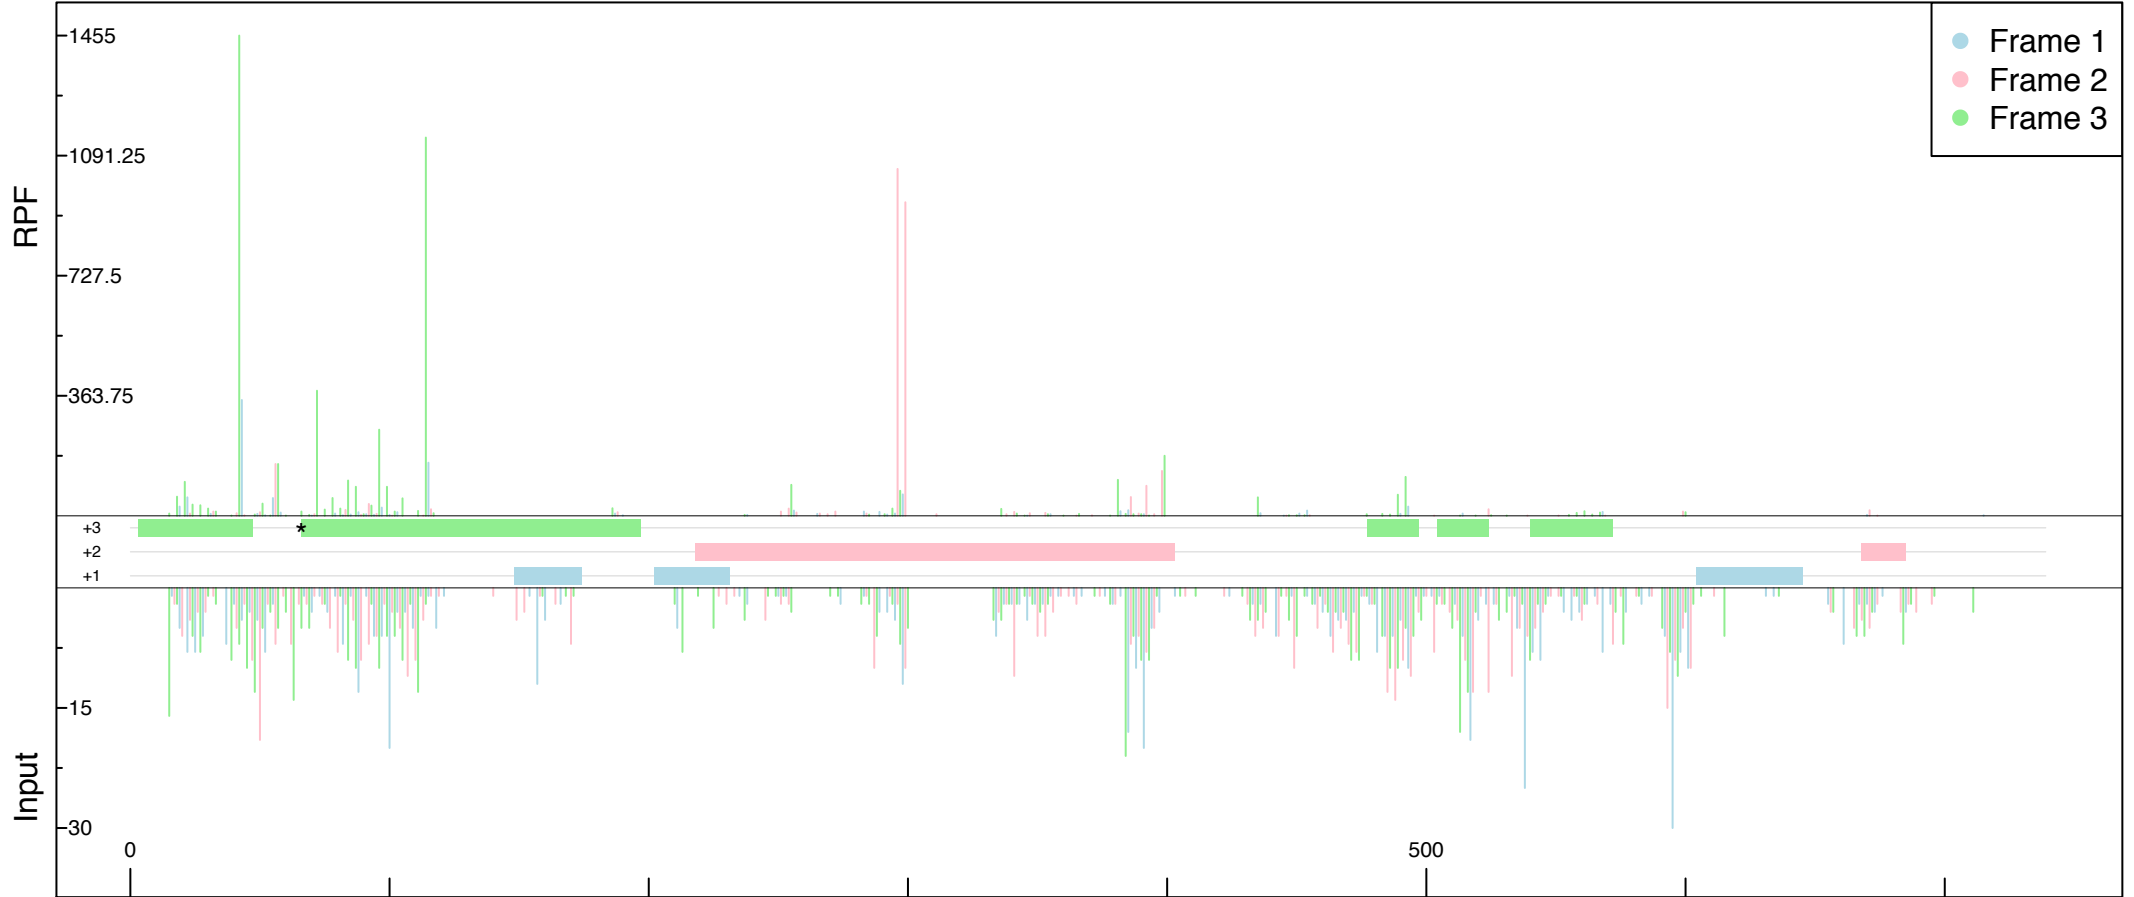

\*MRMMIACHTSKDRTGLFAILNTYCQHYVIDLLQPVSFALALY



ENSDART00000147782, Global

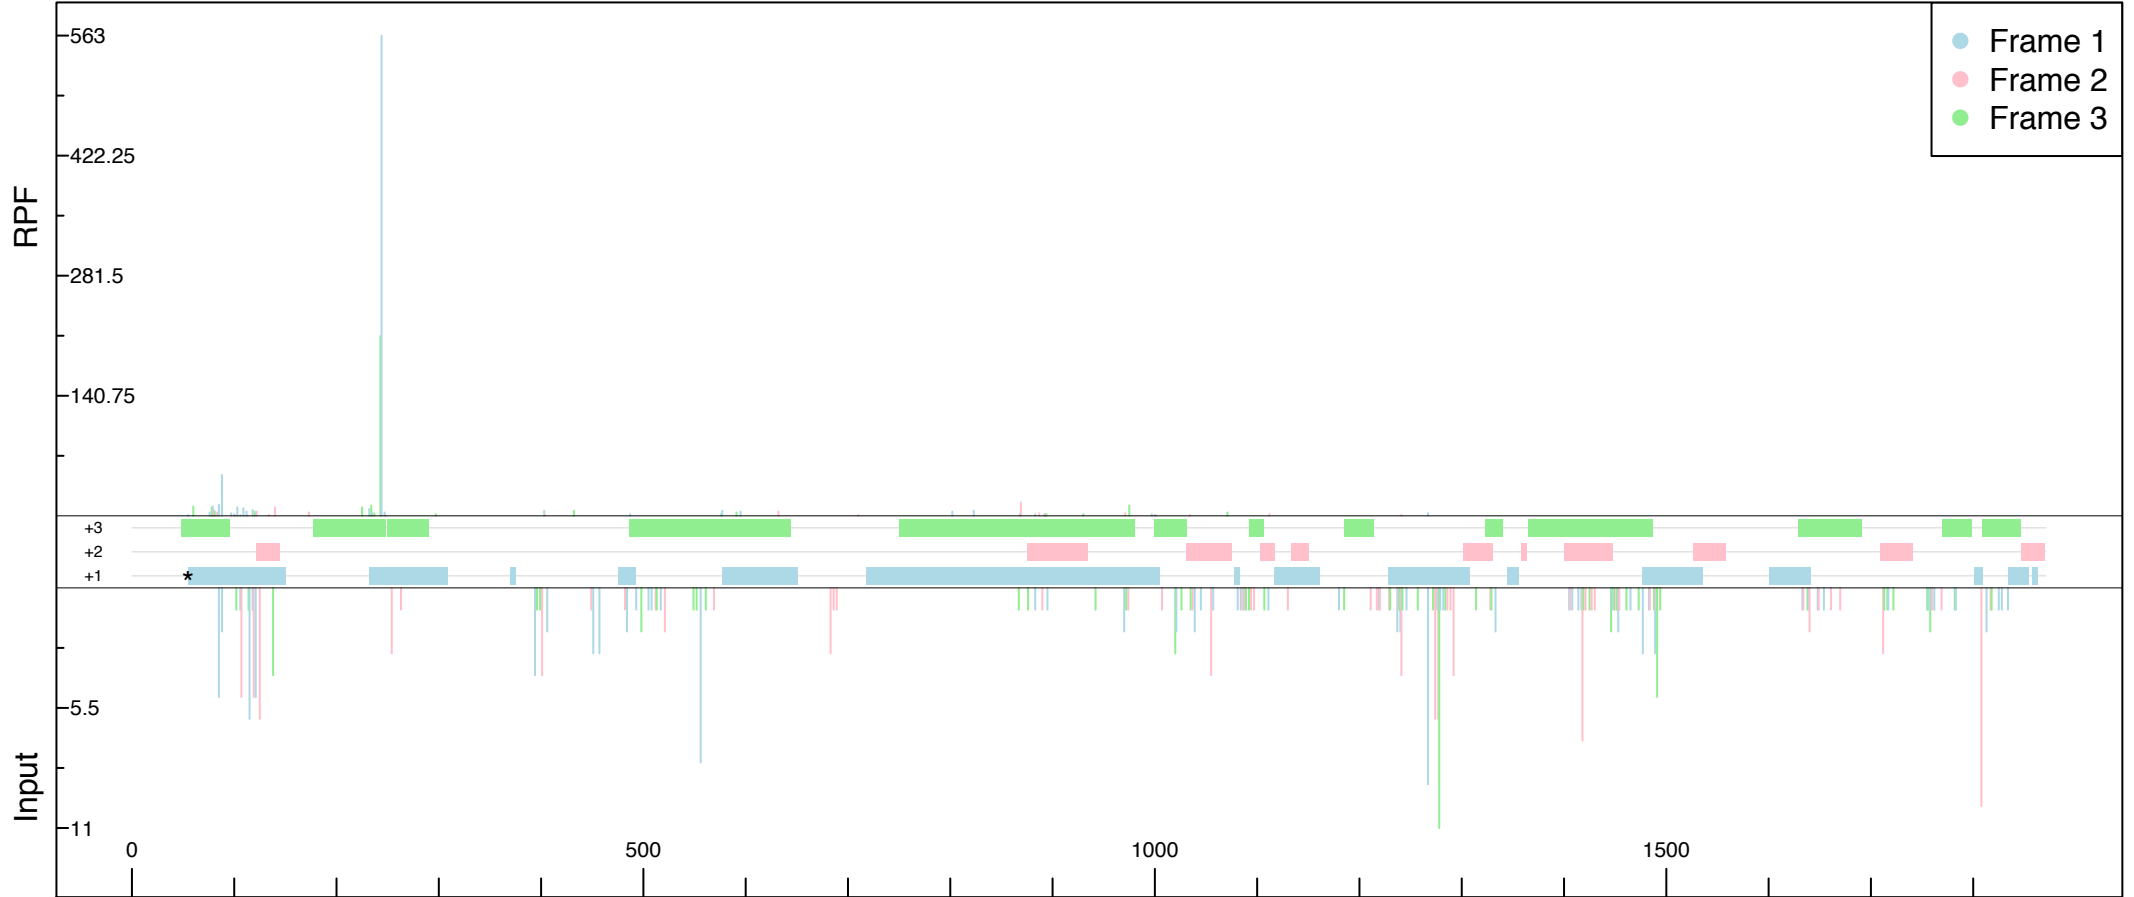

\*MDLKDSKKLEYAREDEAQTFAENEVD EEA VV

ENSDART00000134479, Global

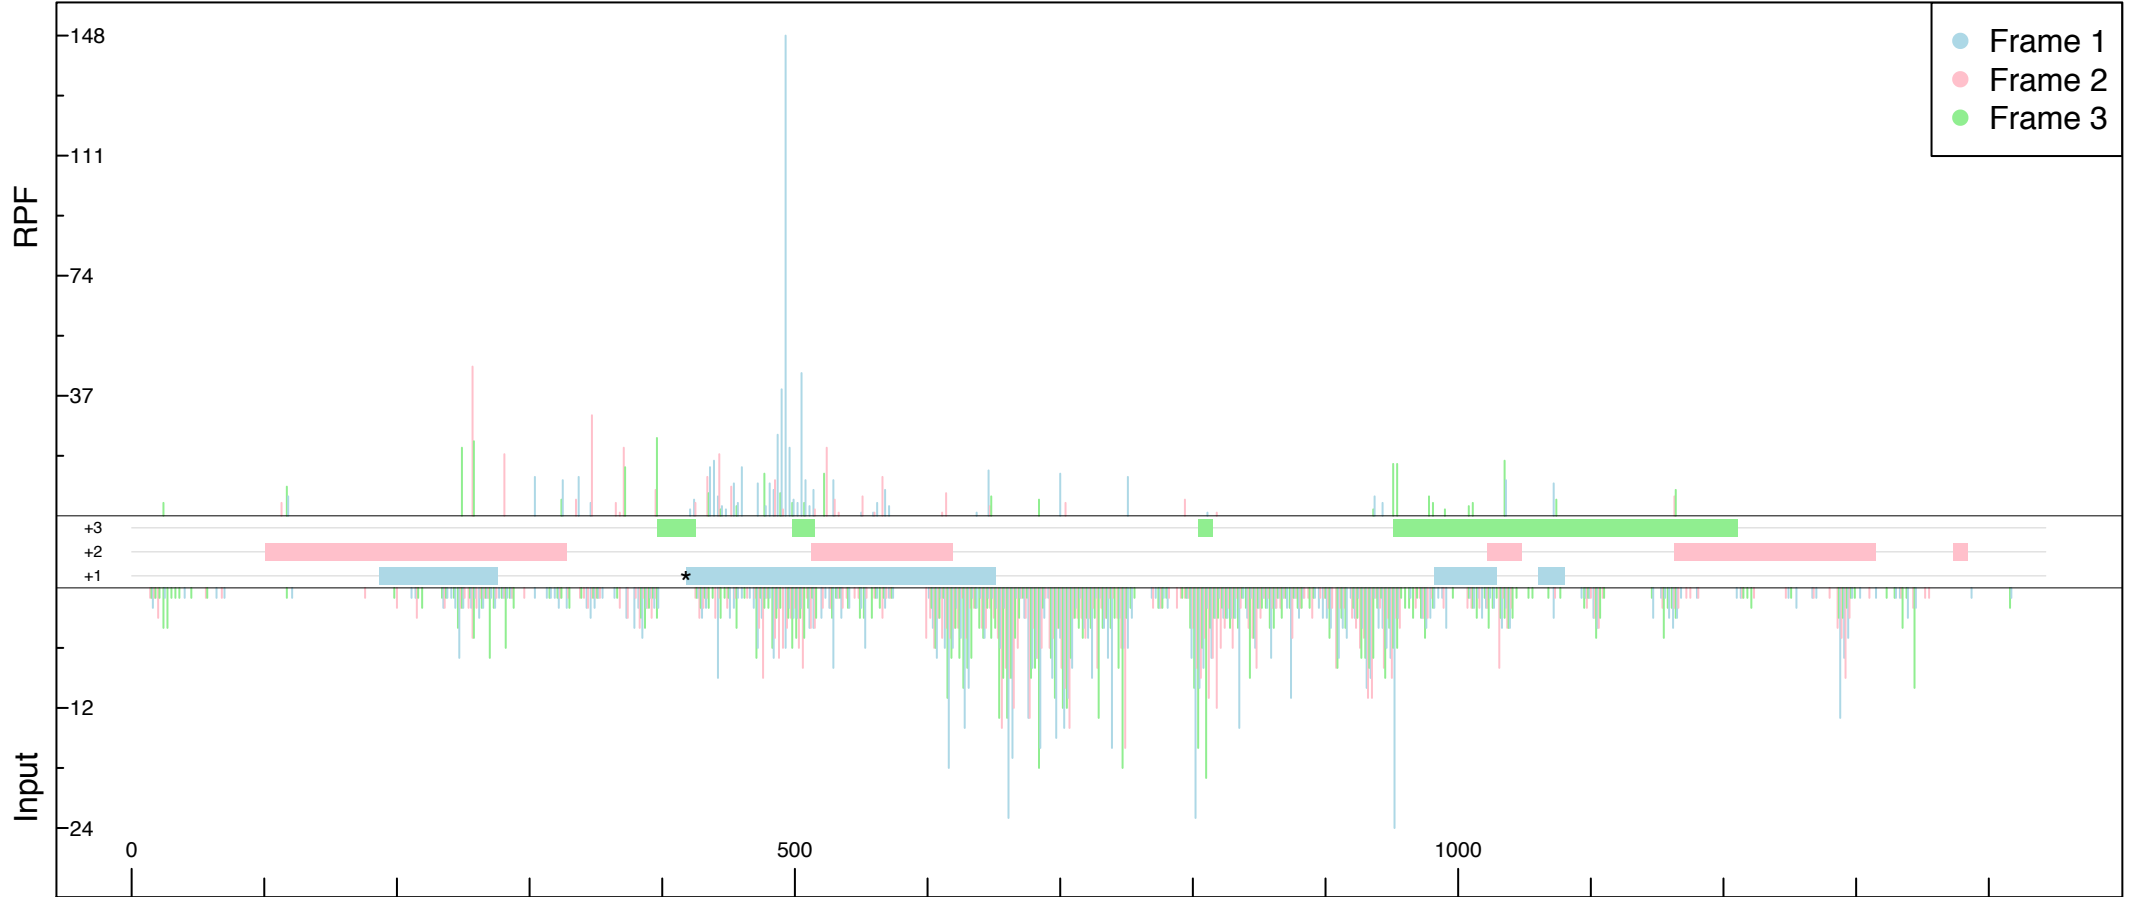

\*MPDCSSTPNSVGPADQCLQYYHKLLGRCVDSYEPNLGRLVFSRCDRLGSRNKTTNHSPPDHSVLLVVRMCRGCICQC

linc-srd5a2a, Global

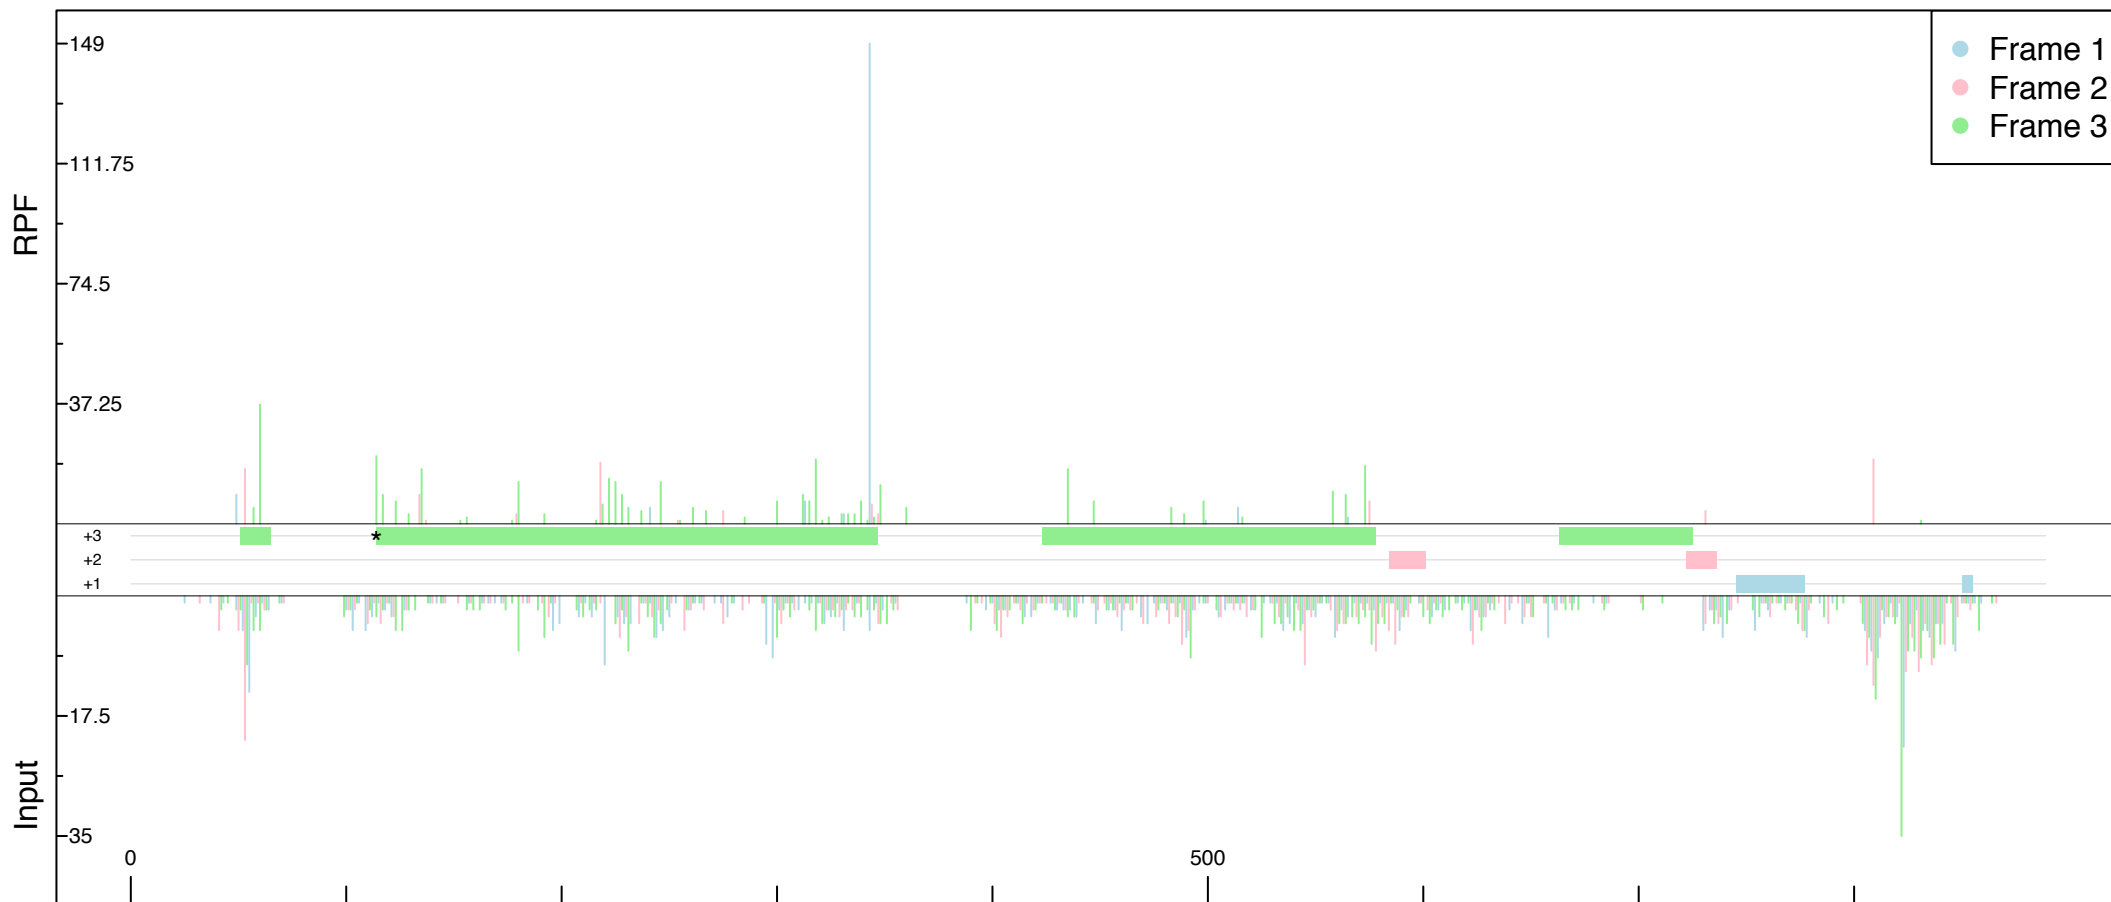

\*MSGLRRFWNNYKVLVMVPLGLLHWGWYSIKSNPLLKKGGRDDEYIPEPGIVSYVAQPAPALPPLPEKKS~~SK~~TRDQE

ENSDART00000133046, Global

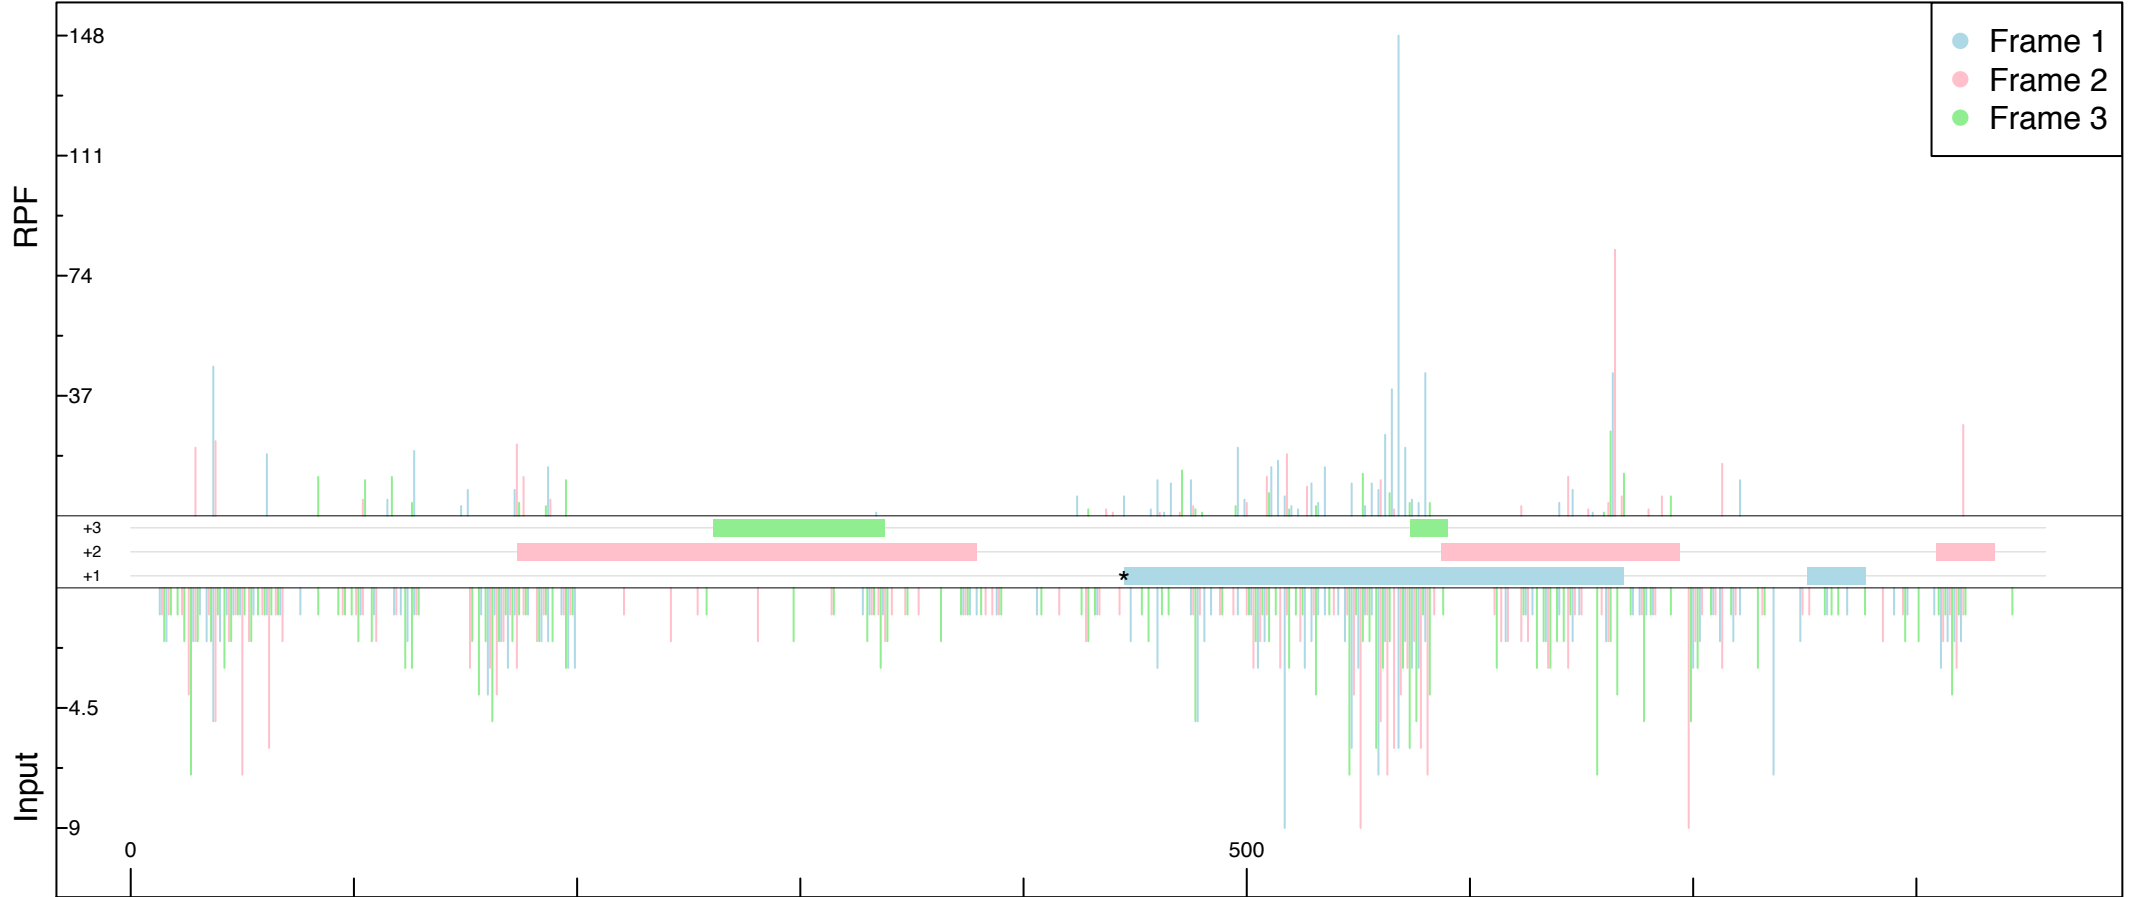

\*MPADPAAARVSILAYWMPDCSSTPNSVGPADQCLQYYHKLGRVCDSYEPNSGRLVFSRWRDRLGSRNKTTNHS

ENSDART00000134071, Global

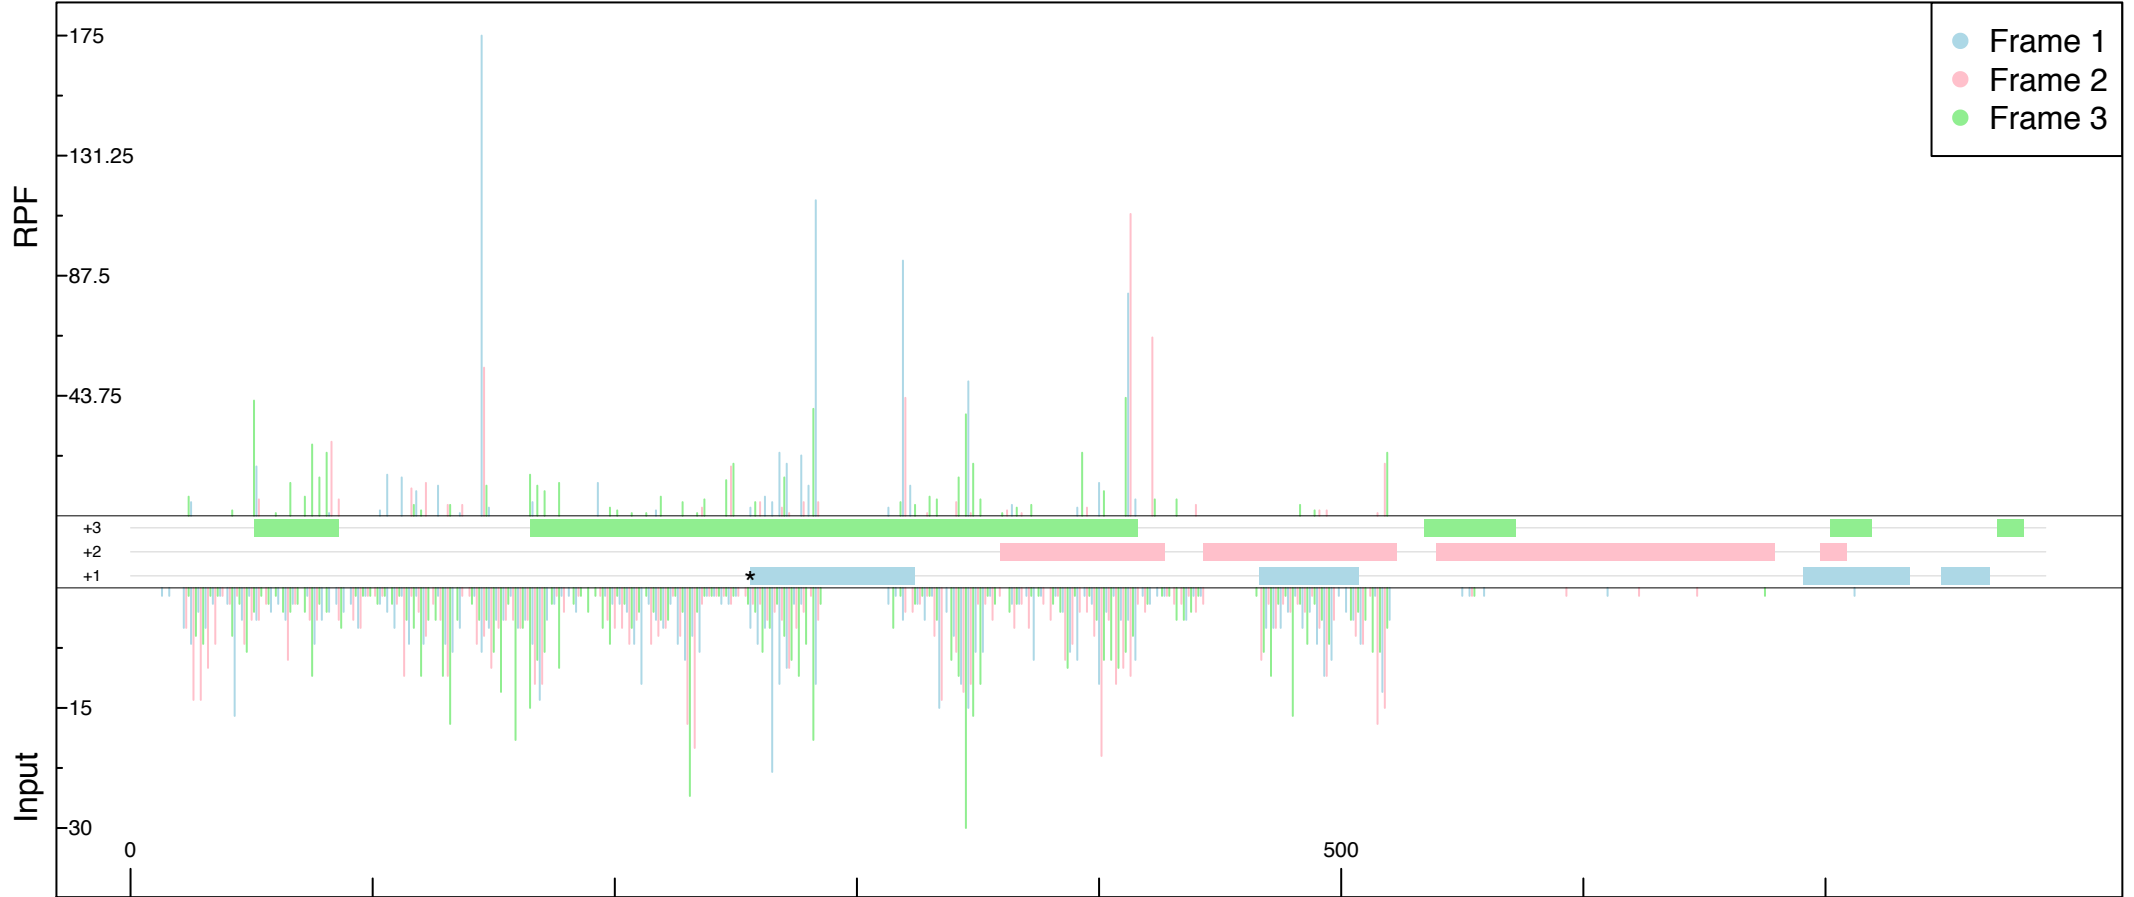

\*MMA PVW TYRCPRLQVSIKTVYI

# linc-cd74, Global

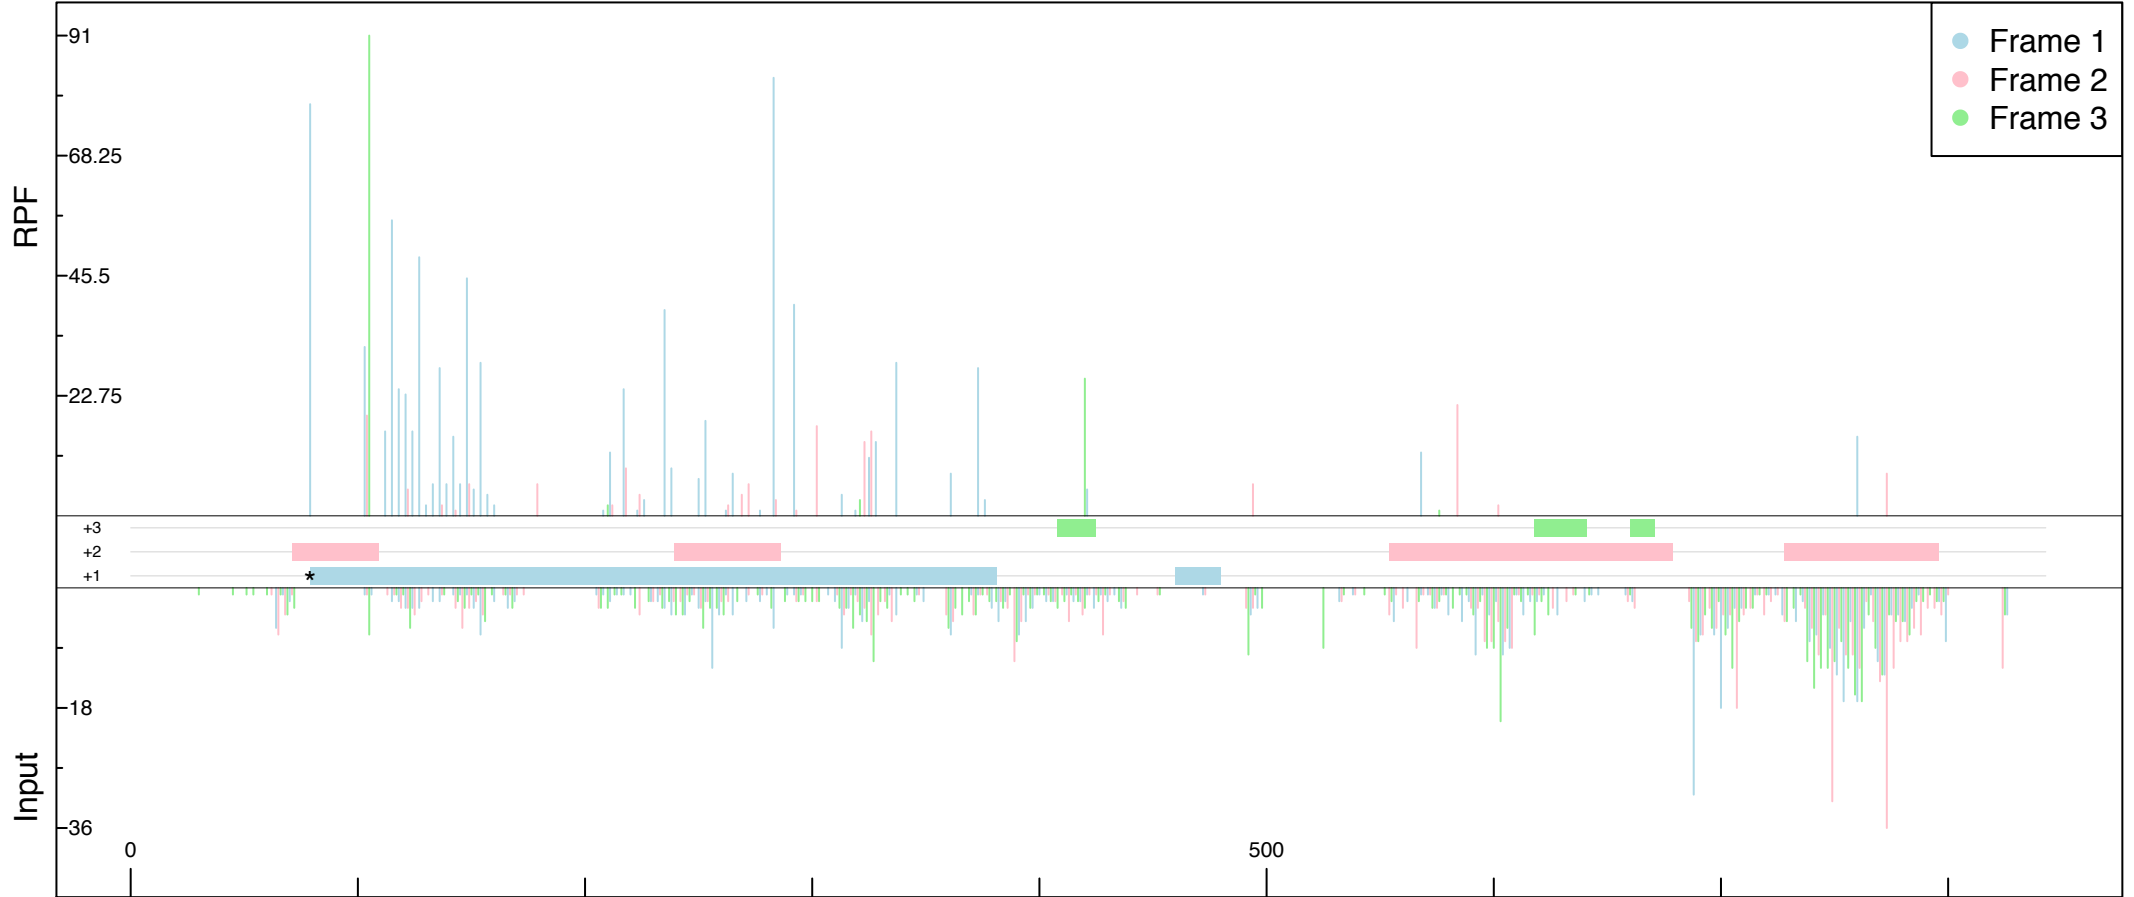

\*MADKDPFRQLKDLSELLKDQLEDIQRRVEGEVGVGIPQGGSVLSSPFLKGLAGYVVAKL RSSAILGVLIGTCTGIYAAQSYQVPNIENIKNYFSSFKKR

# ENSDART00000134600, Global

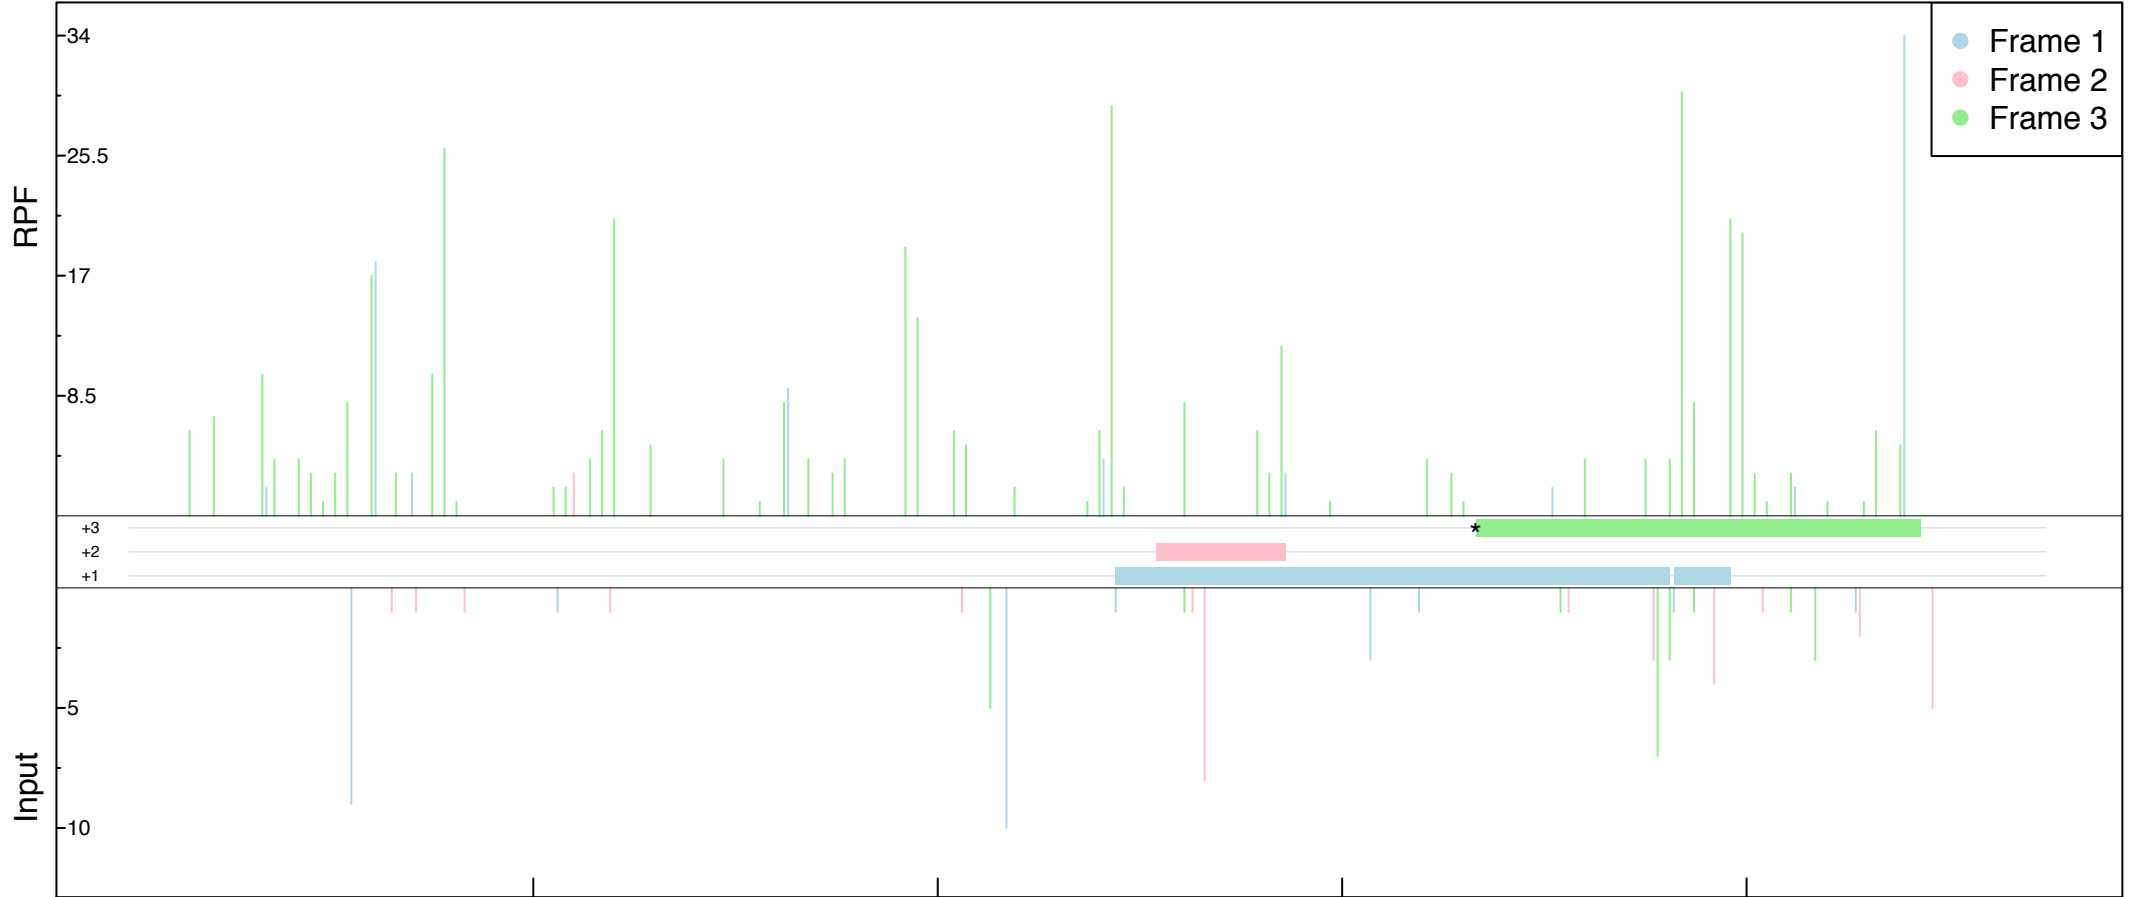

\*MLHNMVTFIQTTVYNIDVGKVKESPRVAEVRARLLN

# ENSDART00000150689, Global

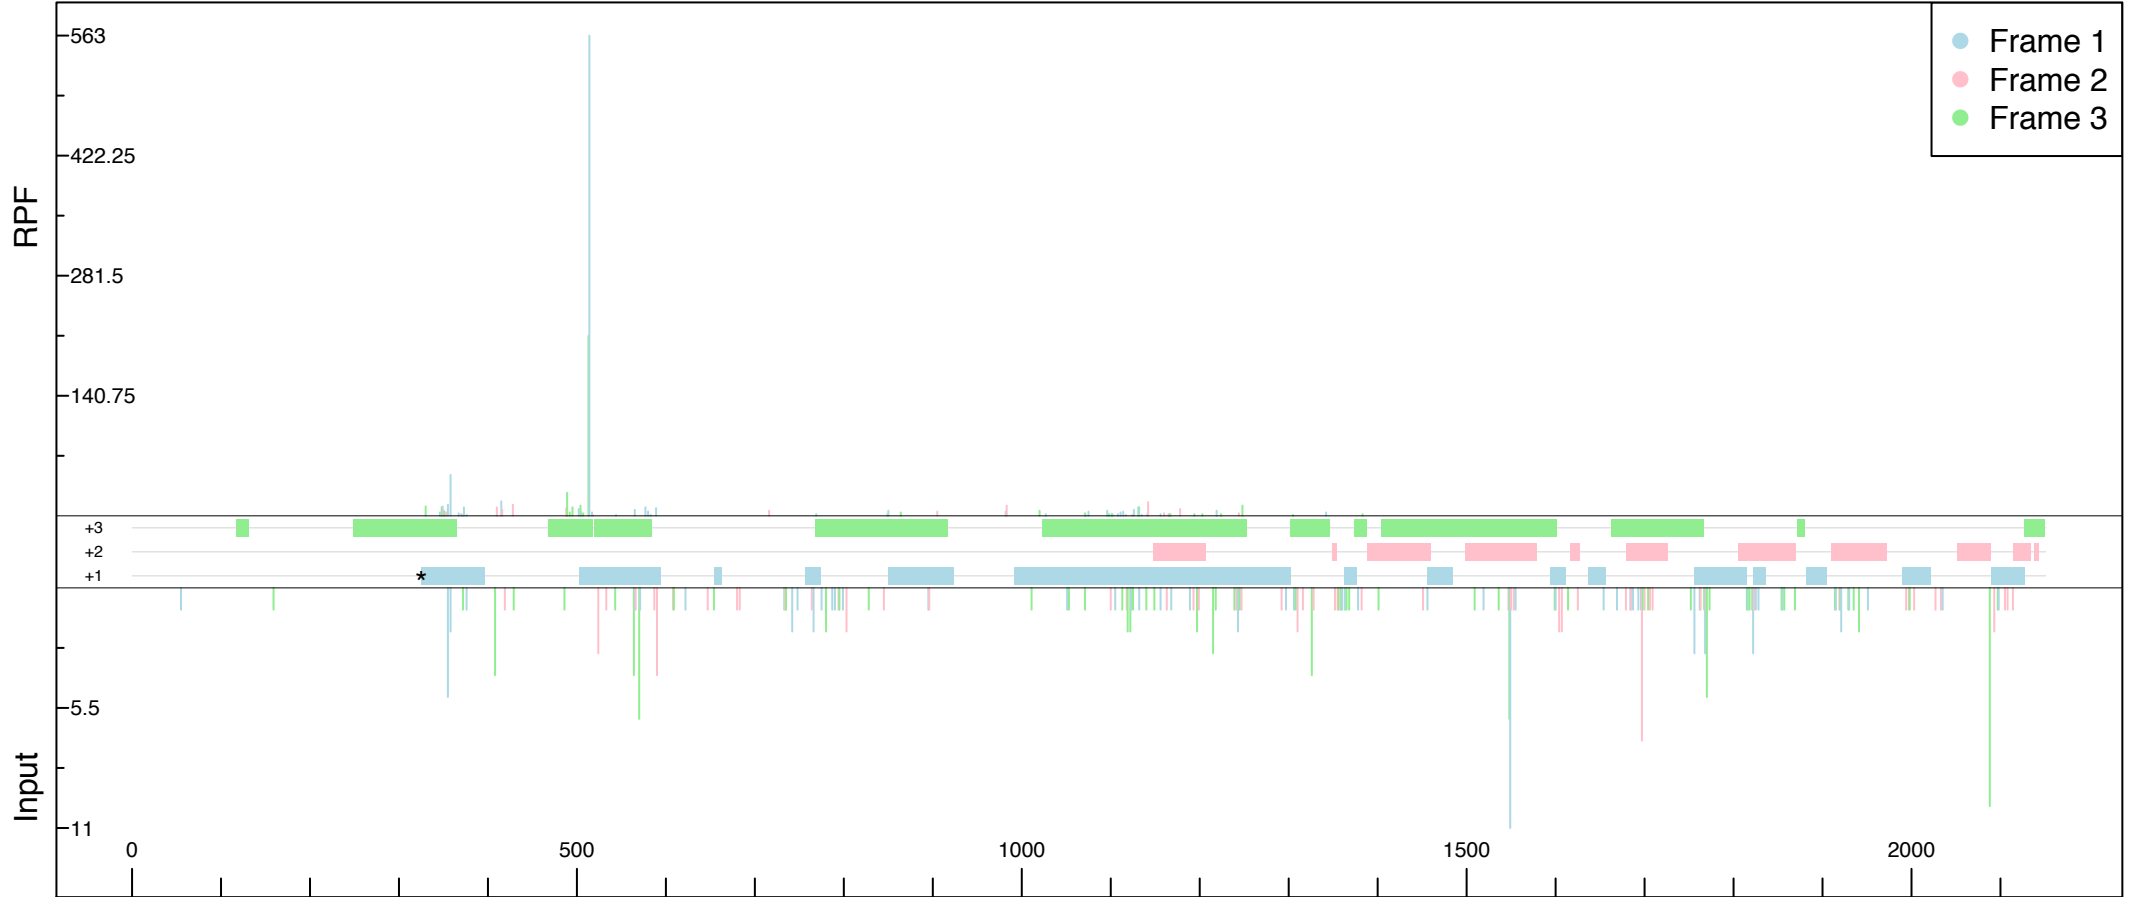

\*MDLKDSKKLEYAREDEAQTF AEN



Zv9\_00048292, Global

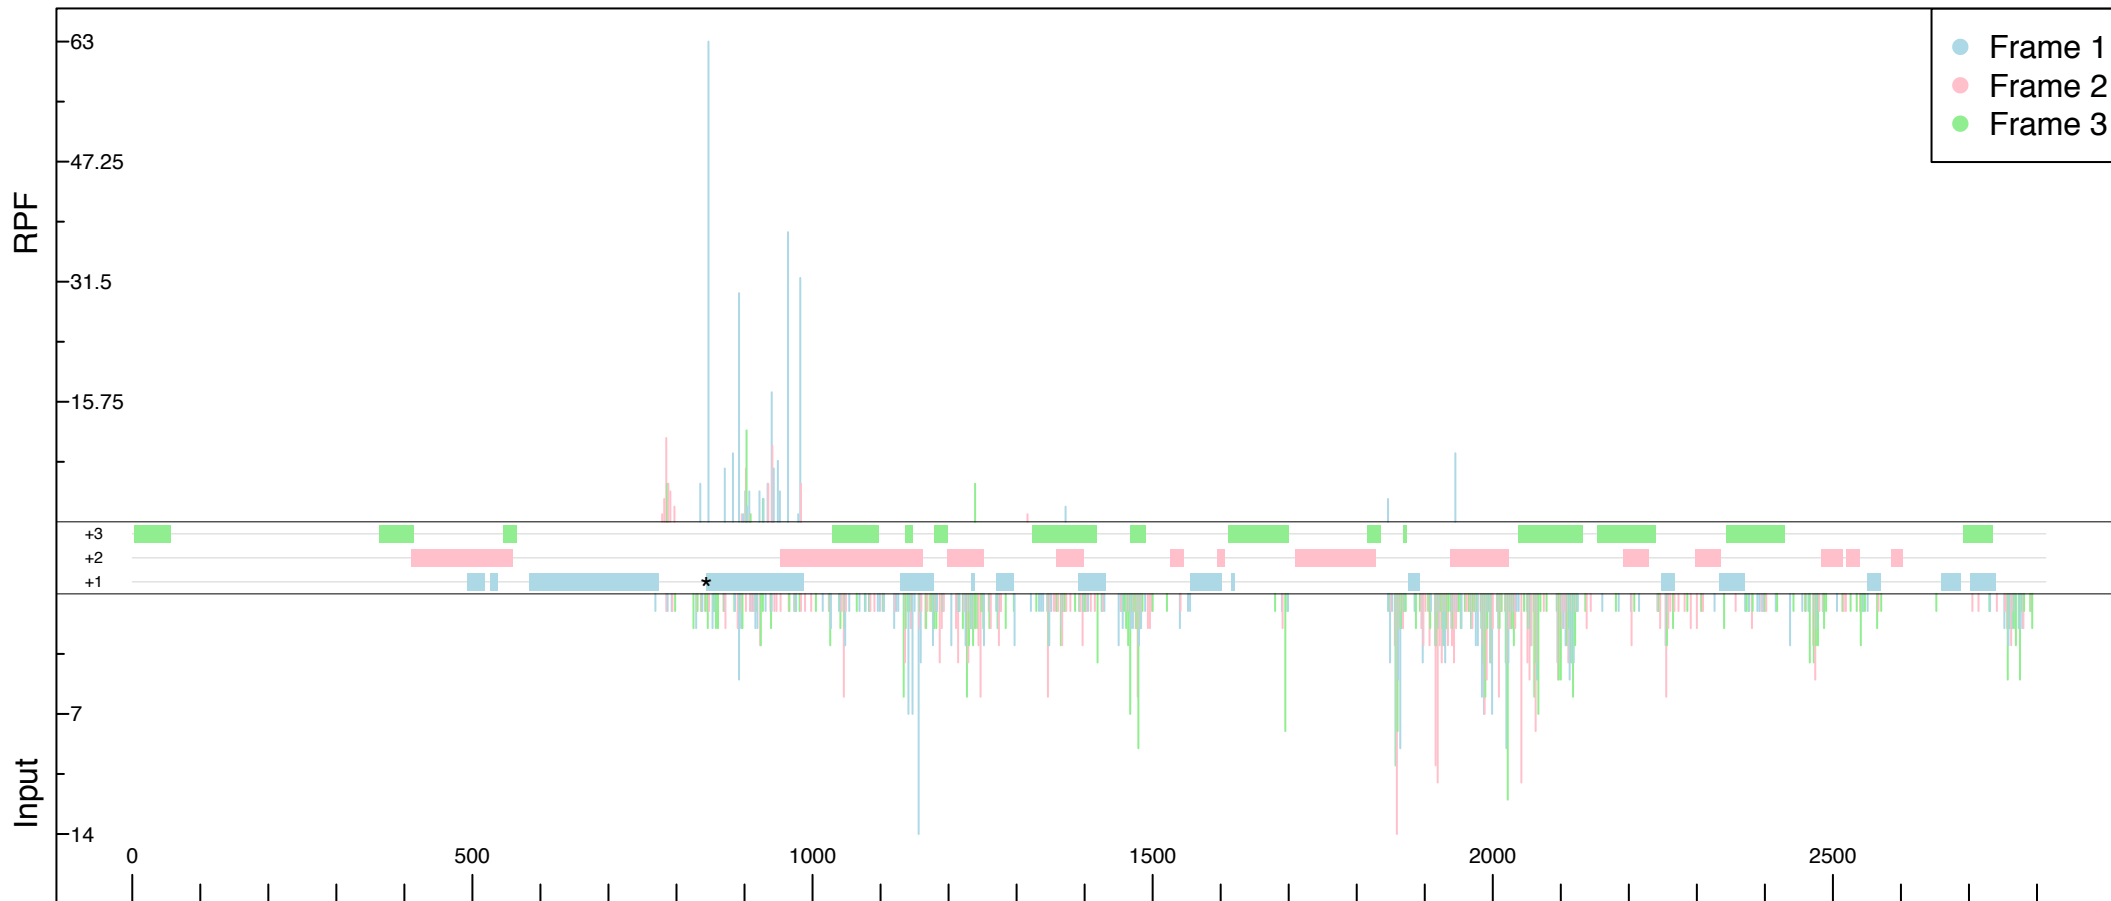

\*MNRGYKSNNSHFSTRLNRRASIRKQSQRLQQSVSSWTDVVLNIRKAP

Zv9\_00058240, Global

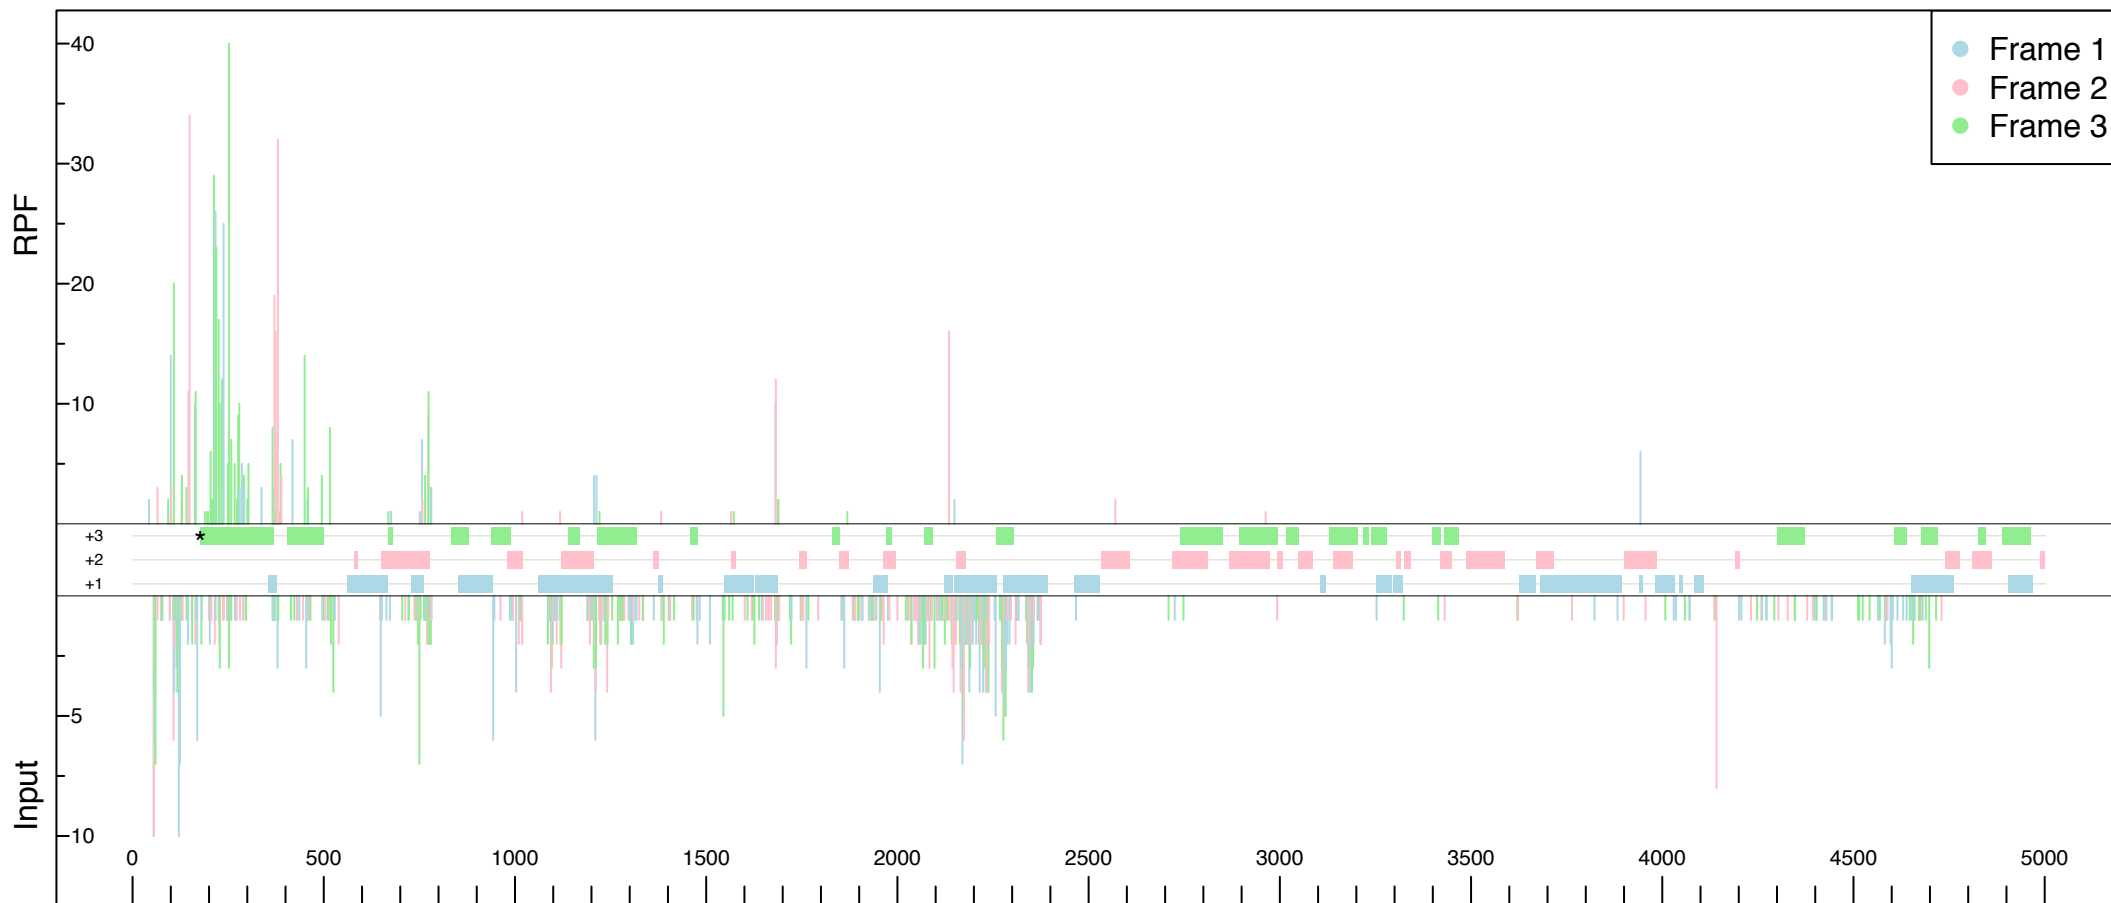

\*MGQFLVFWSTFLLMCVAFSFSSESTTTQQPTTAPPVRKRTFSSASASFIFIPYFYSIEHATL

# ENSDART00000145102, Global

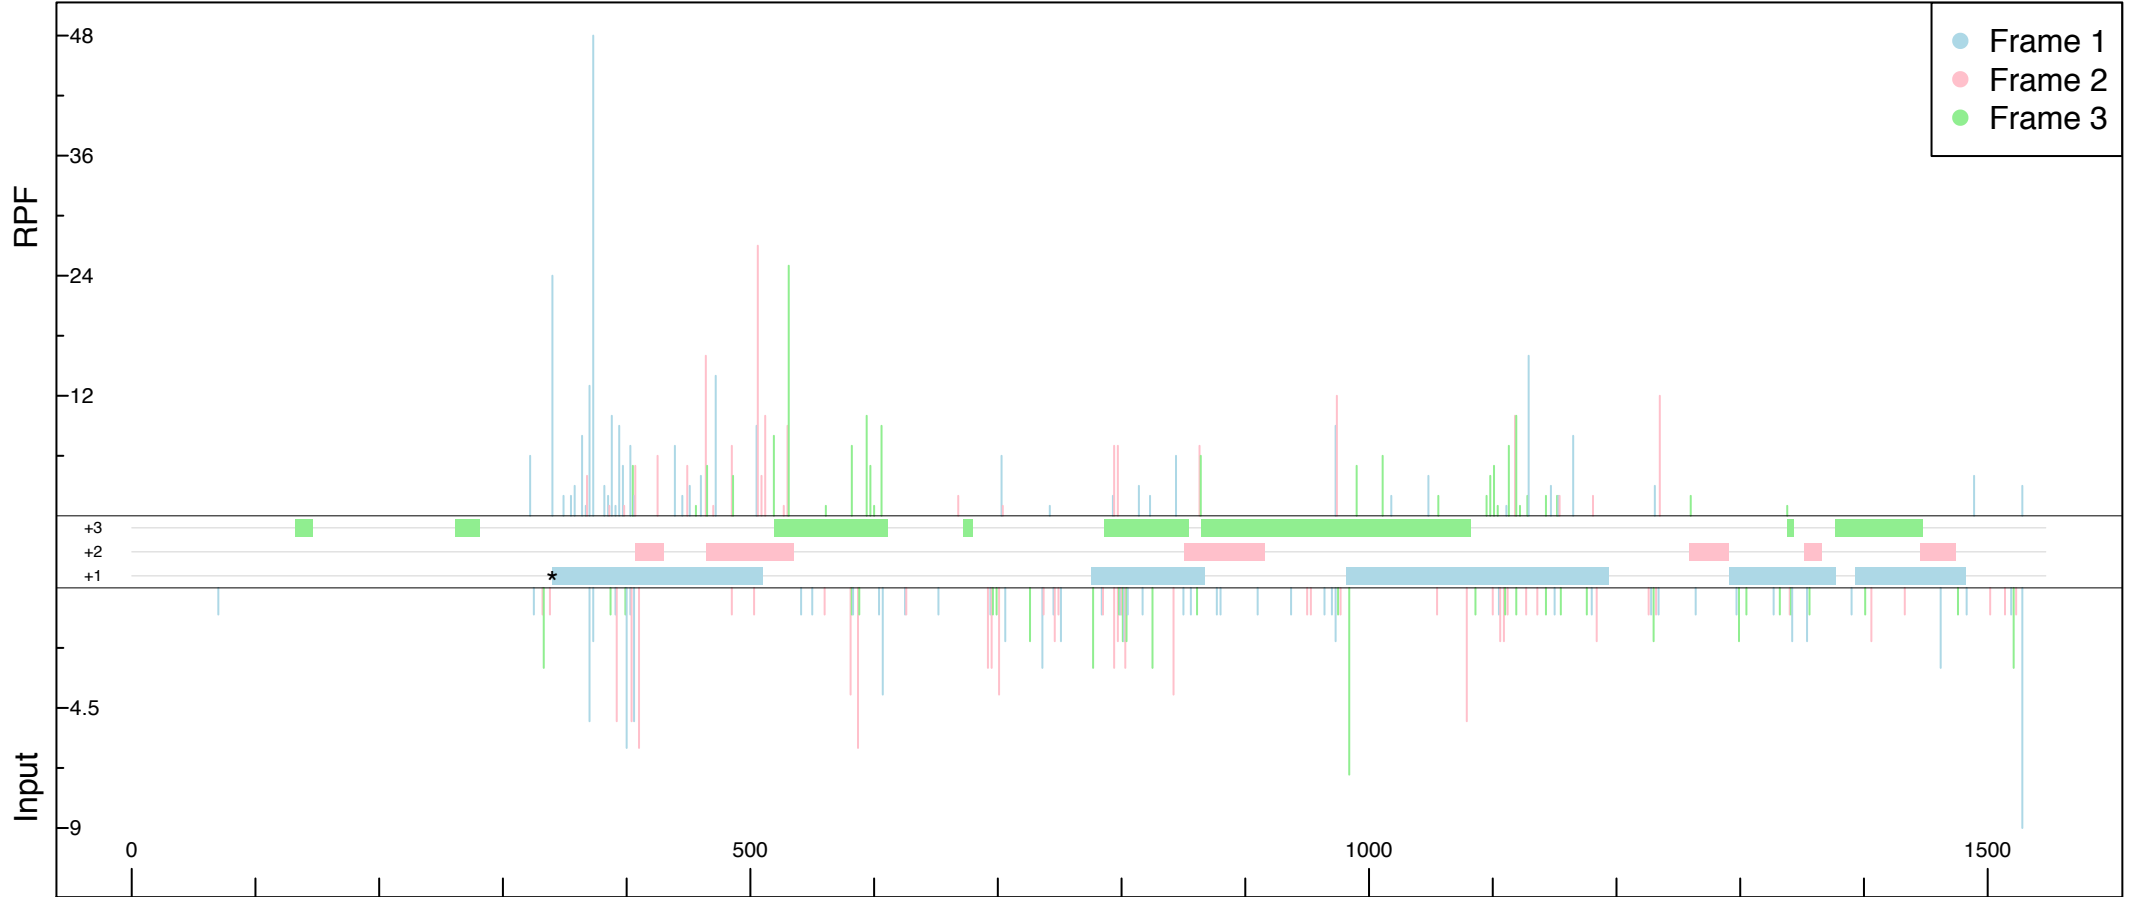

\*MDLKDAKKLEYAREDEAQTFAENEVDDEEAVECENNVAIAIGEDASSFESNANVLRIQ

# ENSDART00000138647, Global

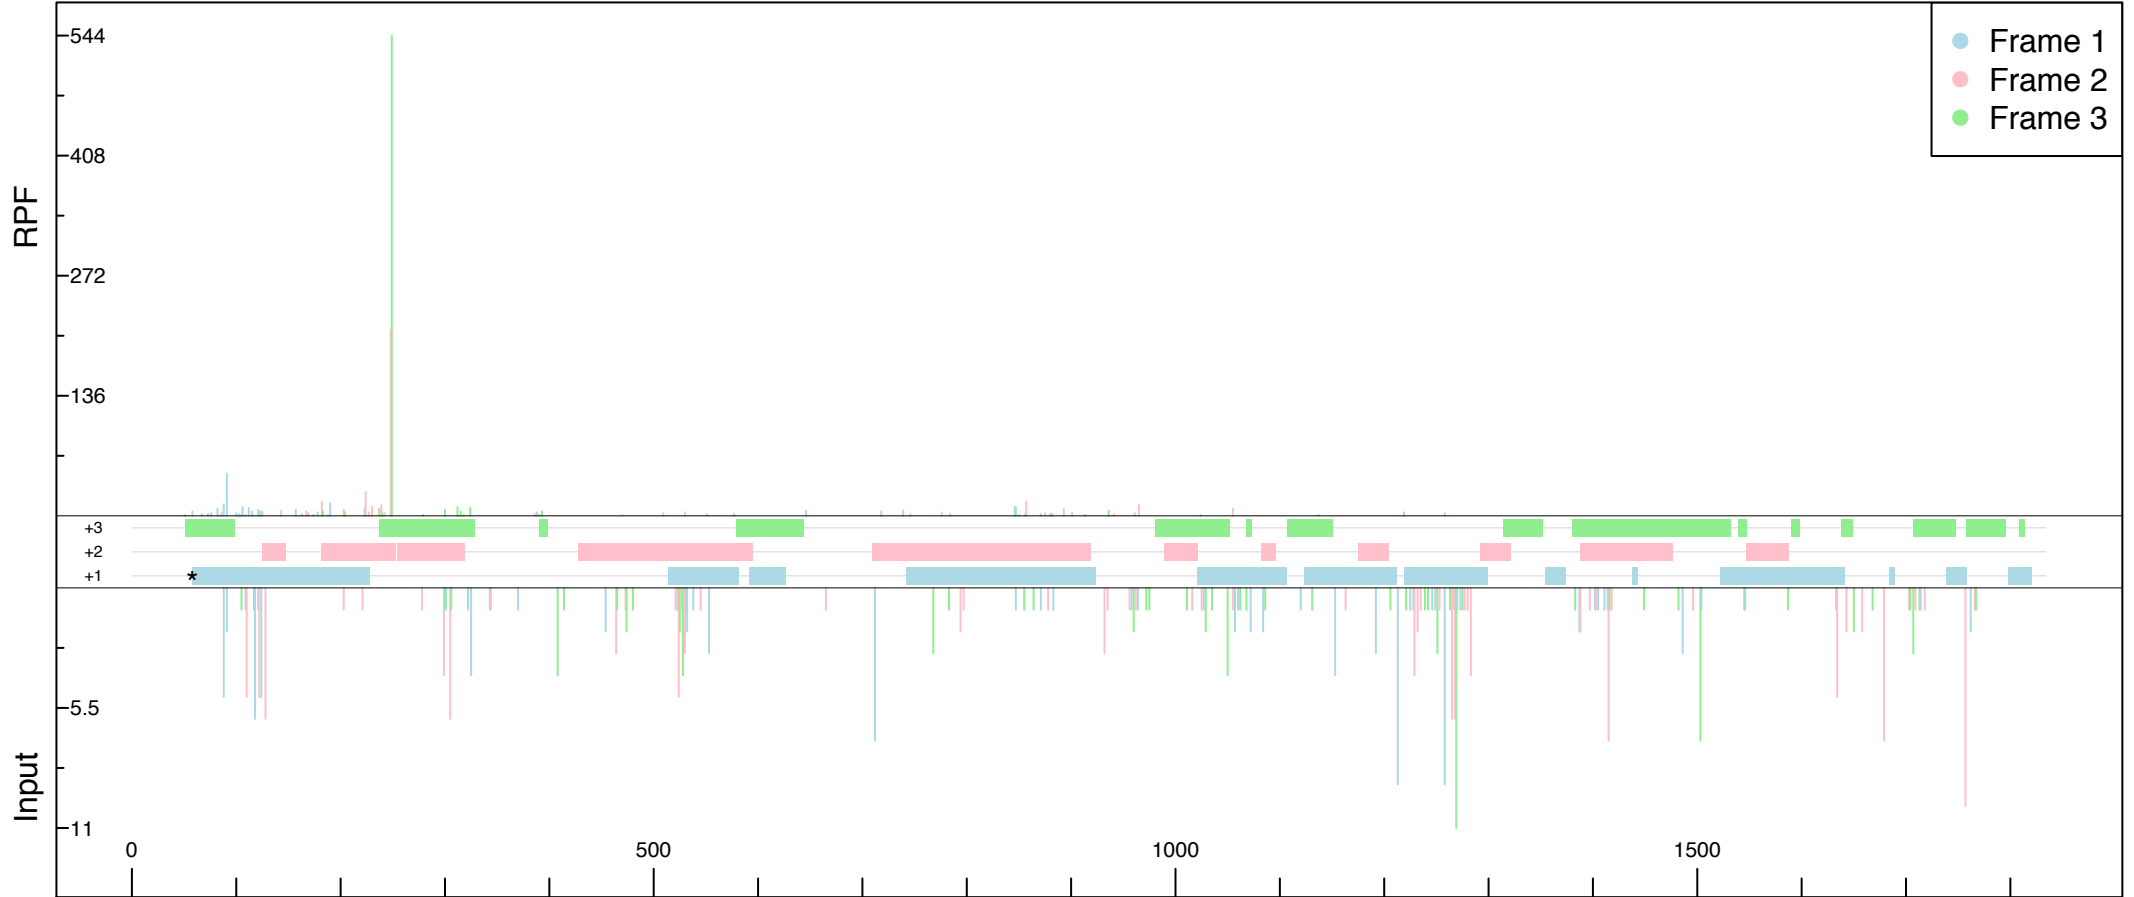

\*MDLKDAKKLEYAREDEAQTFAENEVDDEEAVECNNVIAAIGEDASSFESNANVLRIQ

Zv9\_00049190, Global

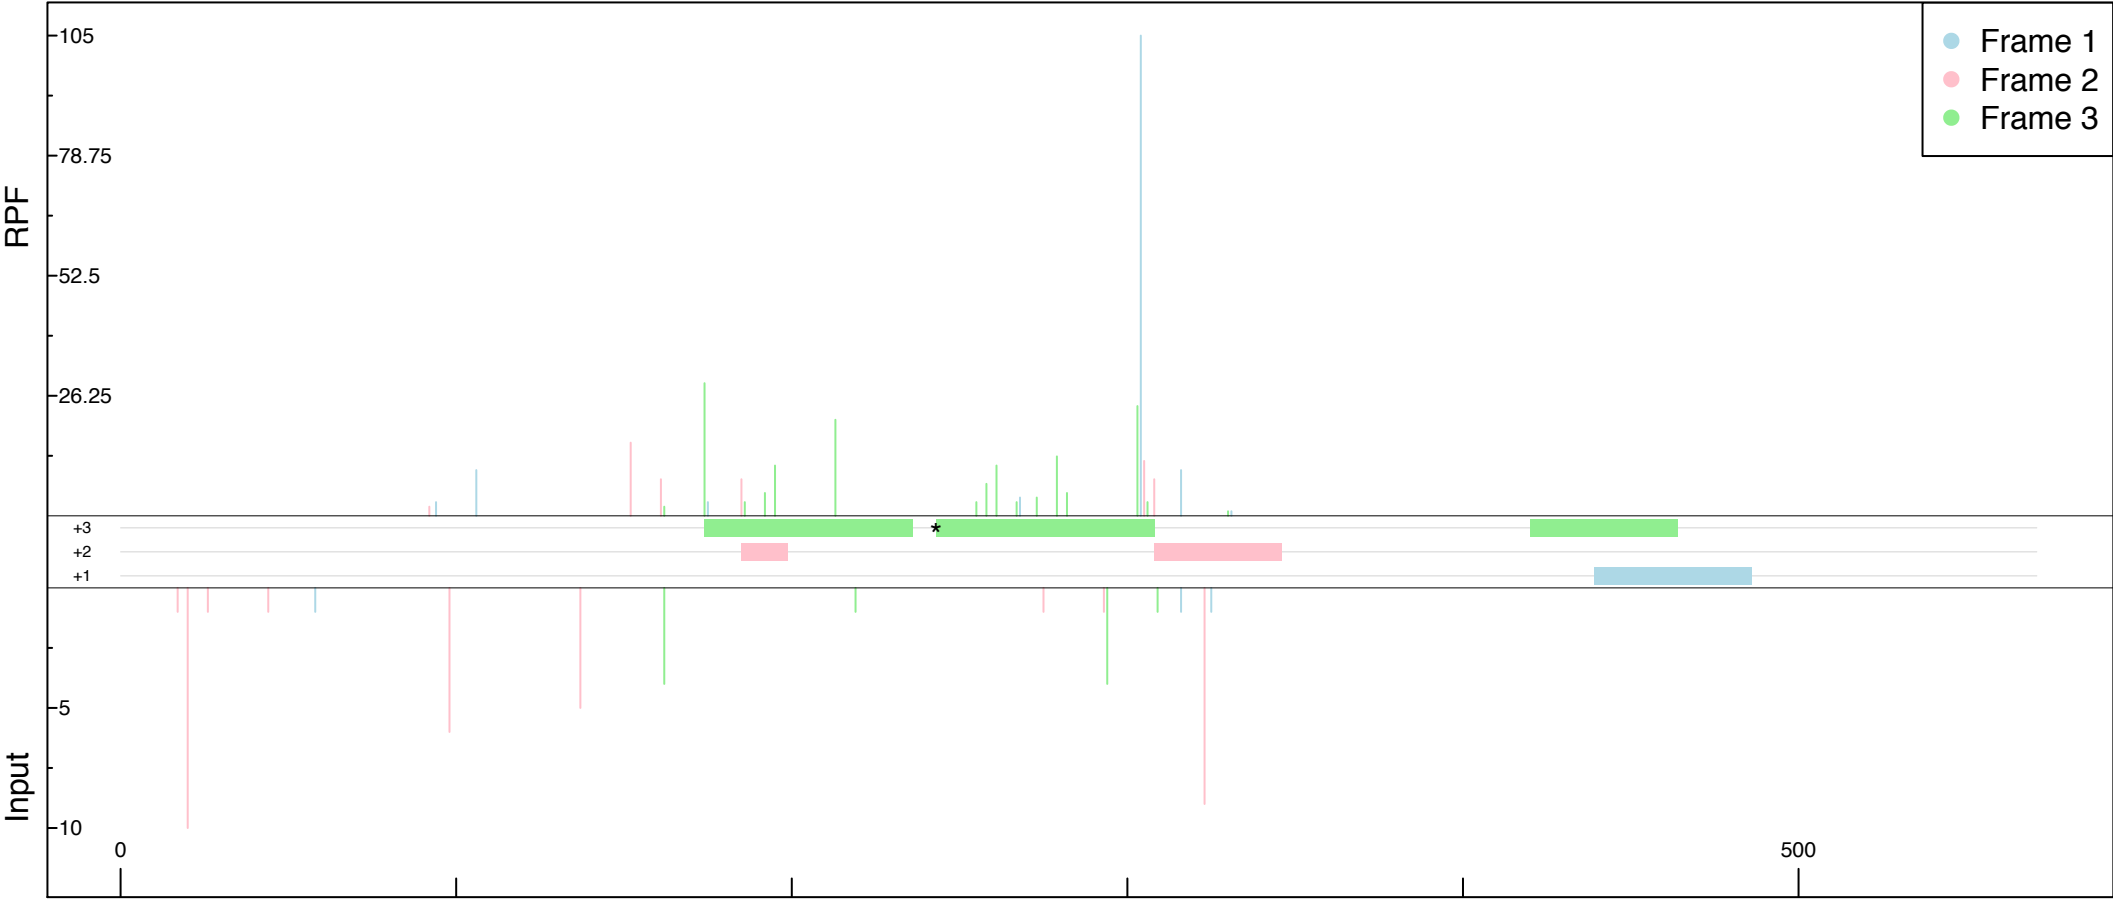

\*MPAASRKTHLQILSSGQQSHF

linc-foxp2\_2, Global

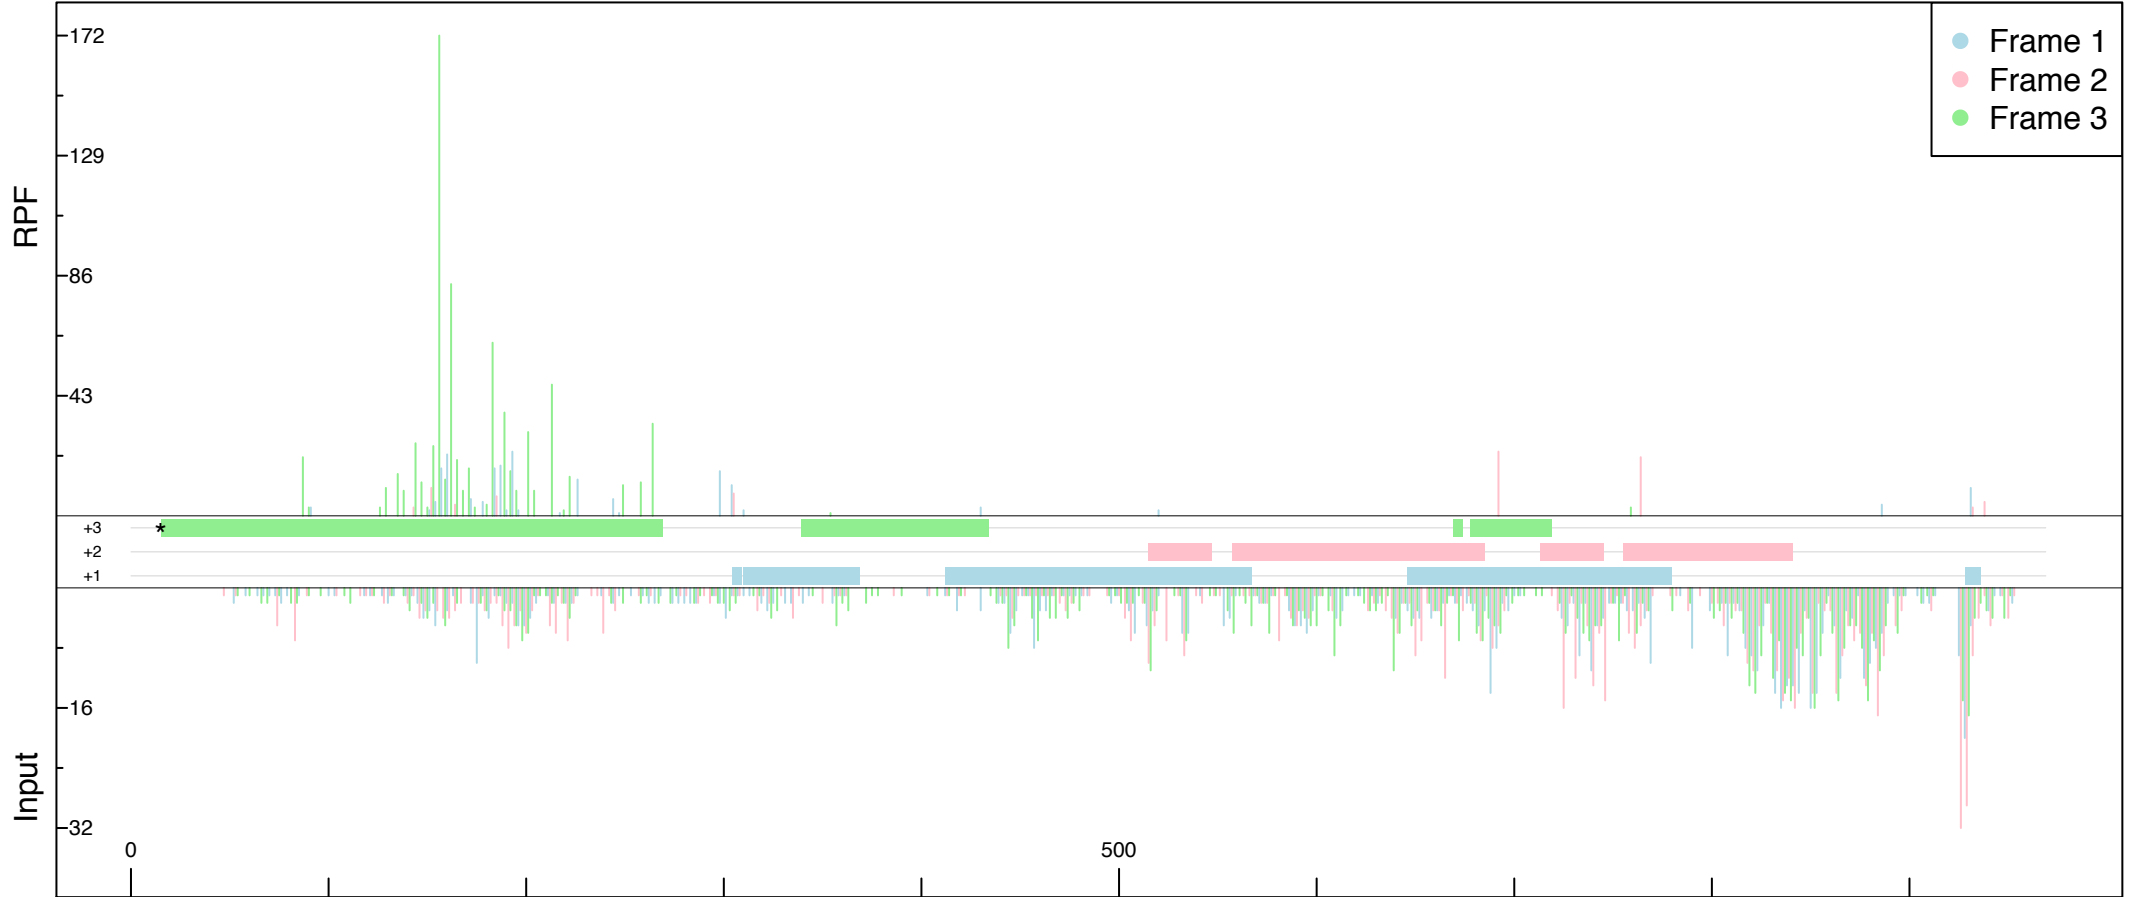

\*MQQDHLTRRHCCASFLFSQPTNNMAPKNPNTHMILCFFLMMFVKTTTEAFDGGDAAALLLGASVTIVGLCACLGWYARTRNGQF

ENSDART00000131305, Global

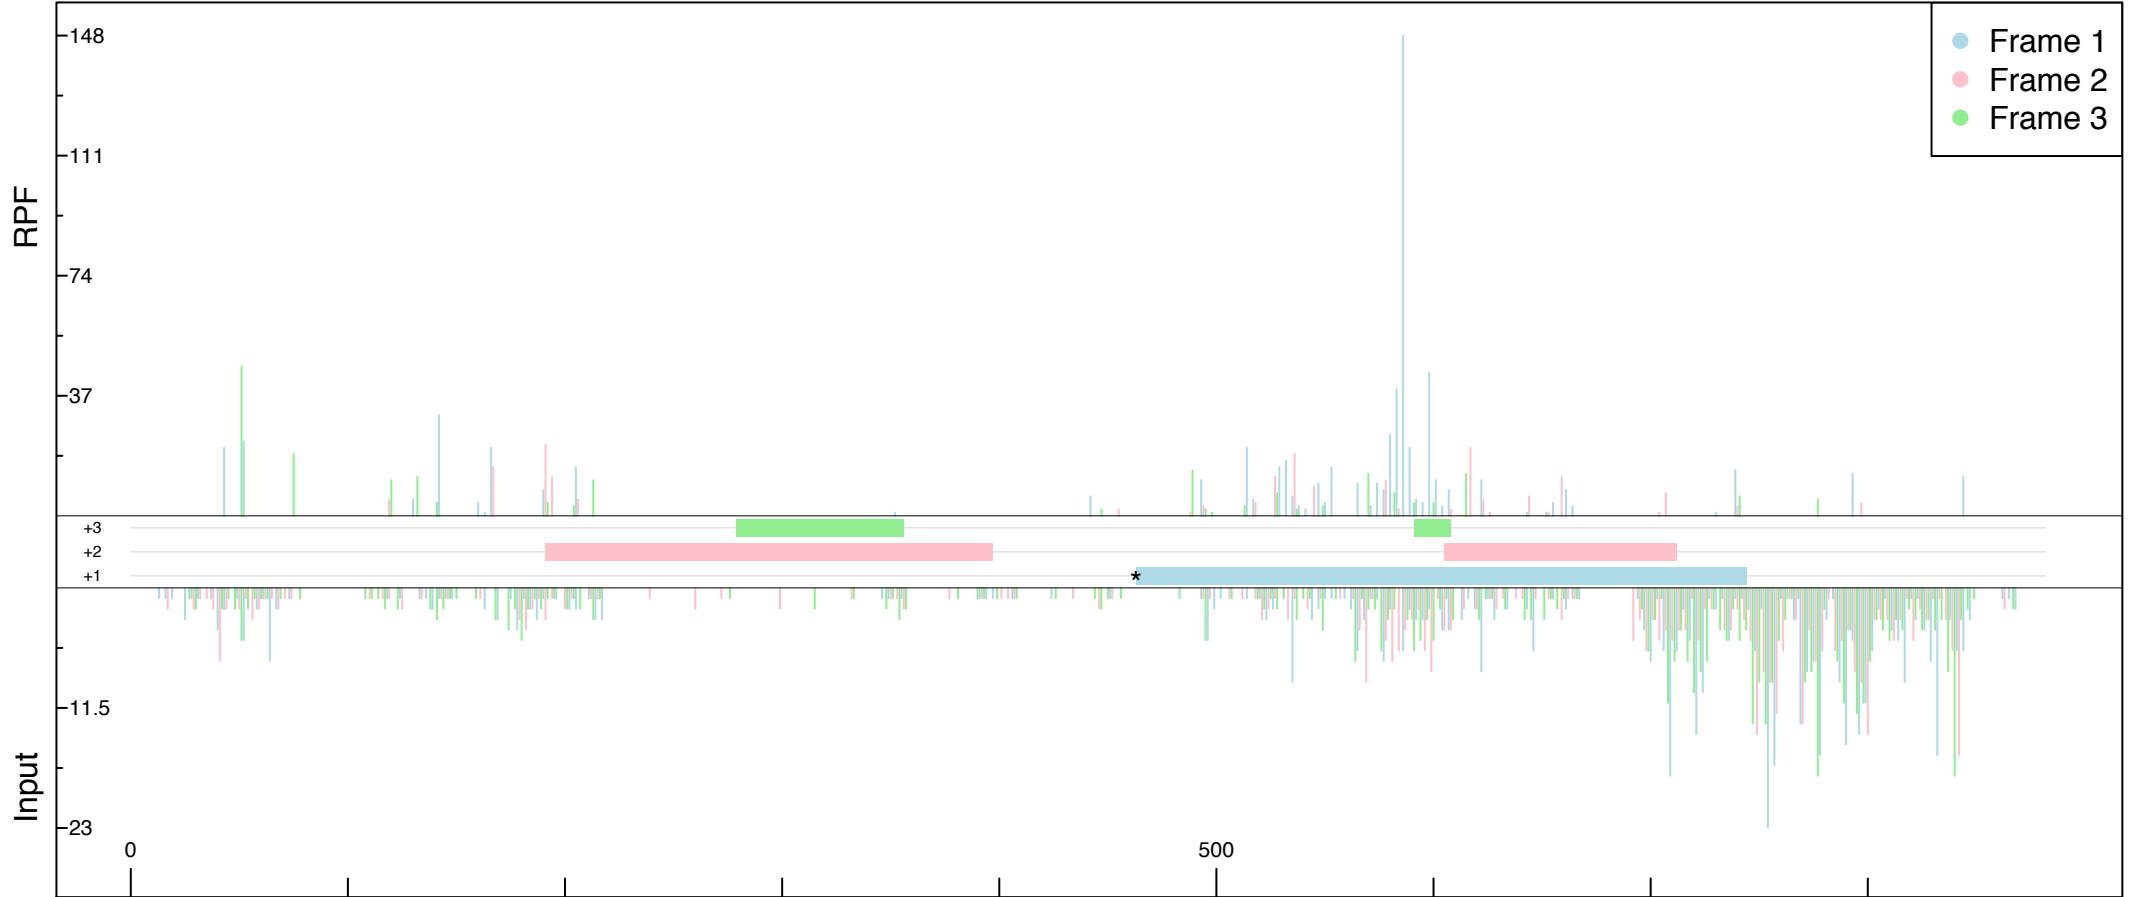

\*MPANPAAARVSILAYWMPDCSSTPNSVGPADQCLQYYHKLLGRCVDSYEPNLGRLVFSRCDRLGSRNKTTNHSPPDHSVLLVVRMCRGCICQC

ENSDART00000127156, Global

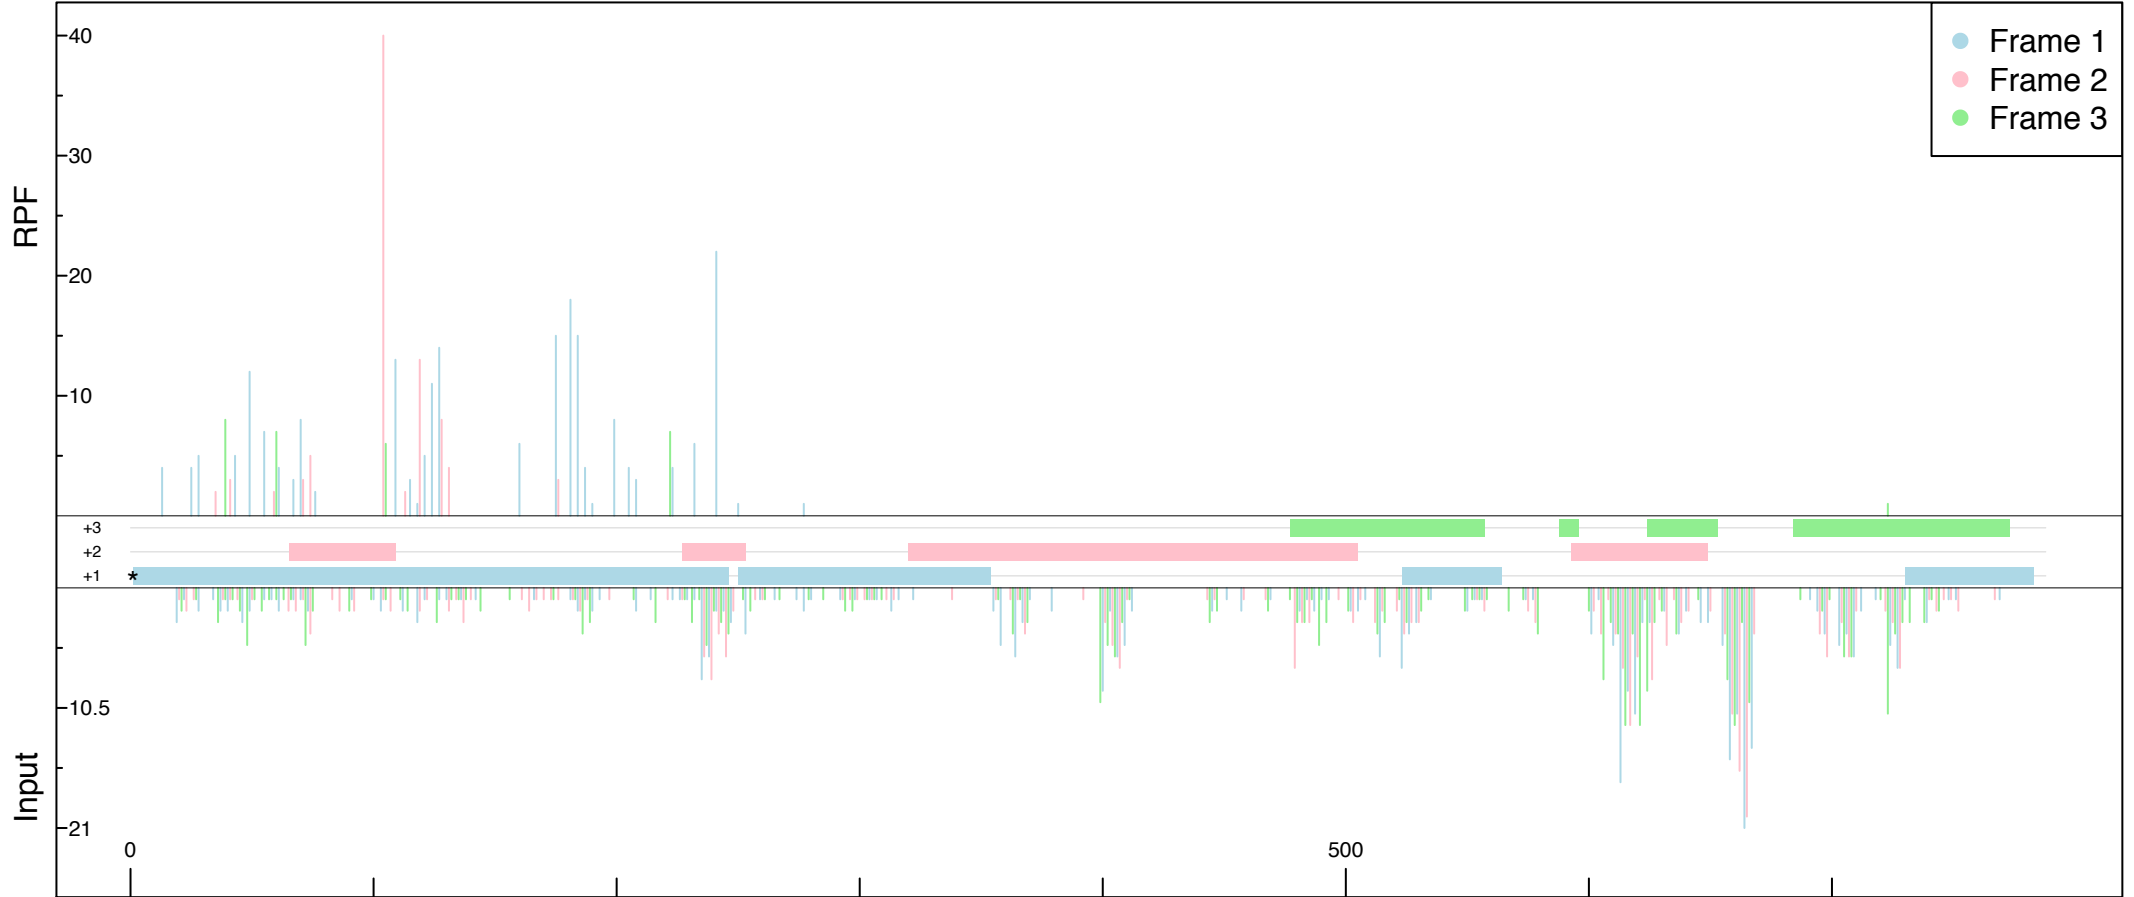

\*MSSVSWDAAPVINGAPPTKHQNGLSSNGDAADFEIILKLSNHSGNSGQSQPADDPIMAFEGGEPFMMKARPMKPQHVAEVL



# ENSDART00000132041, Global

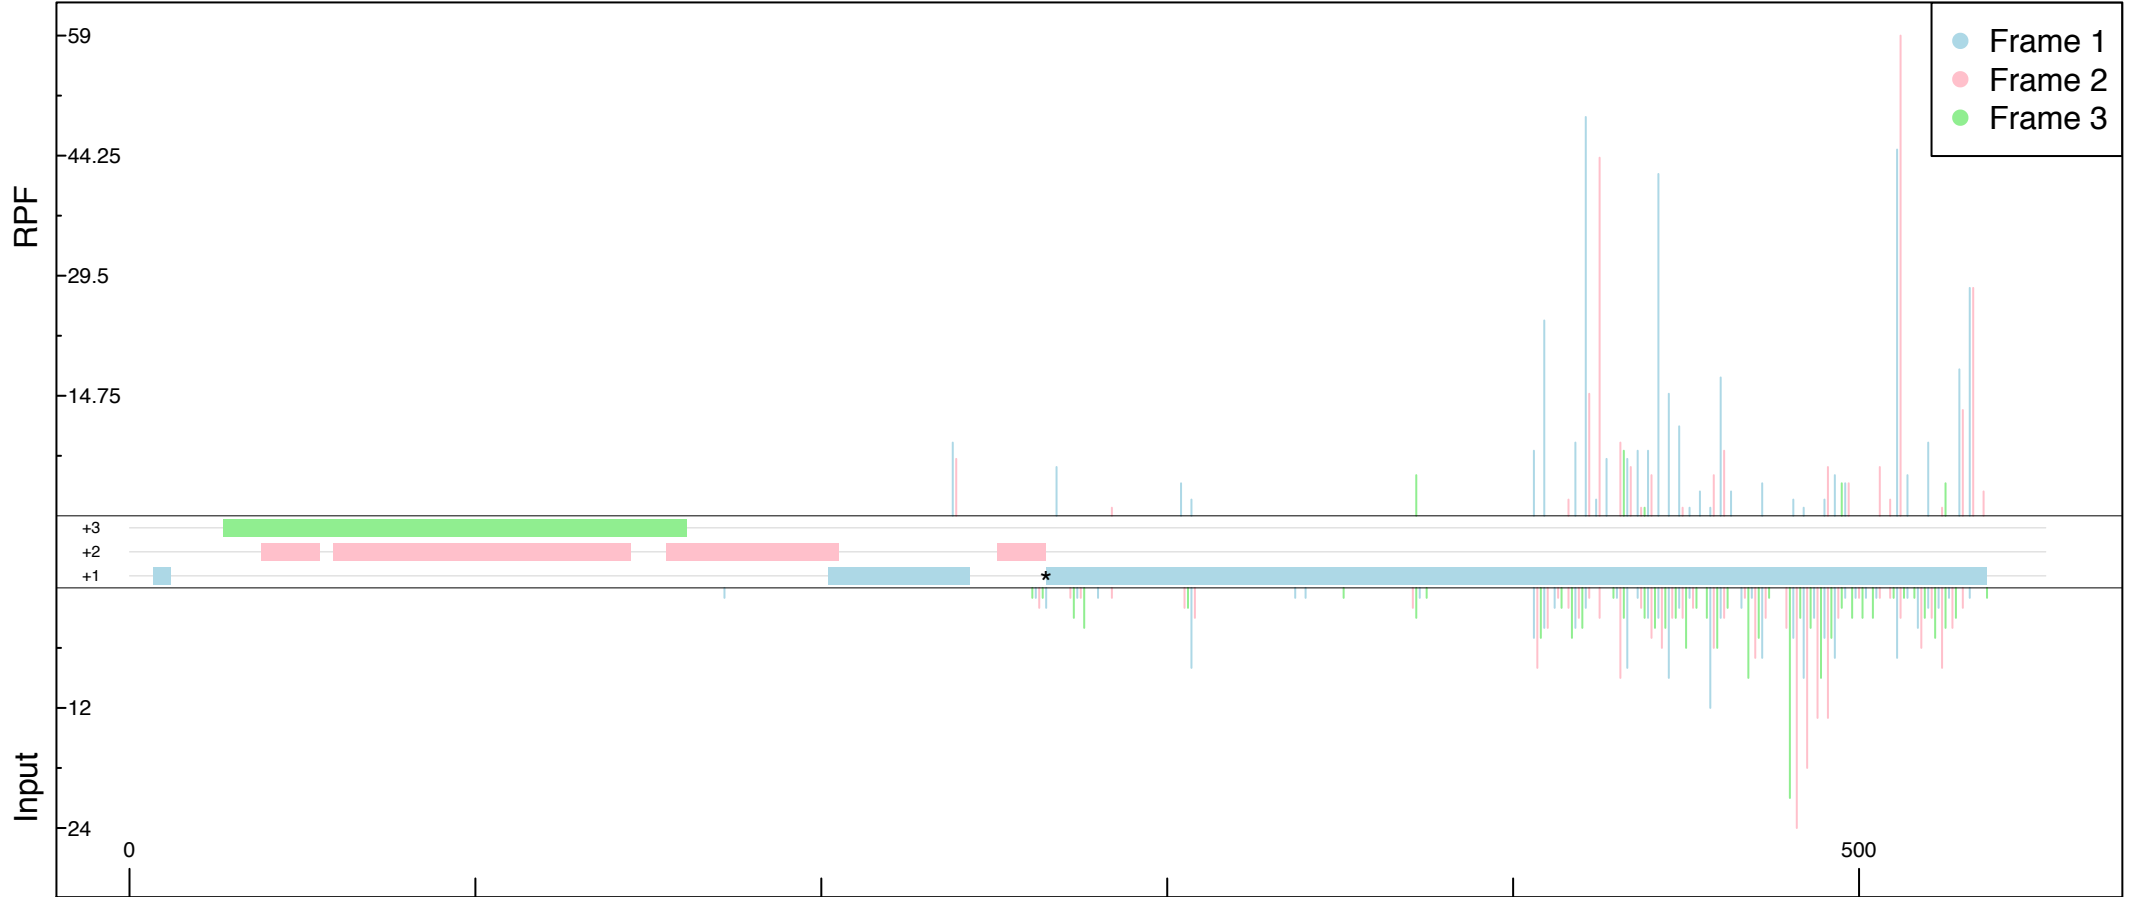

\*MLPINPRIIKEVPPVPPVVSYSLDSEGRVWLGPHLDFTTDFESGLKLYAEDAFCTLEFKGRVADTICLSVLETRGEAVFKRMGLLYHM

# ENSDART00000136316, Global

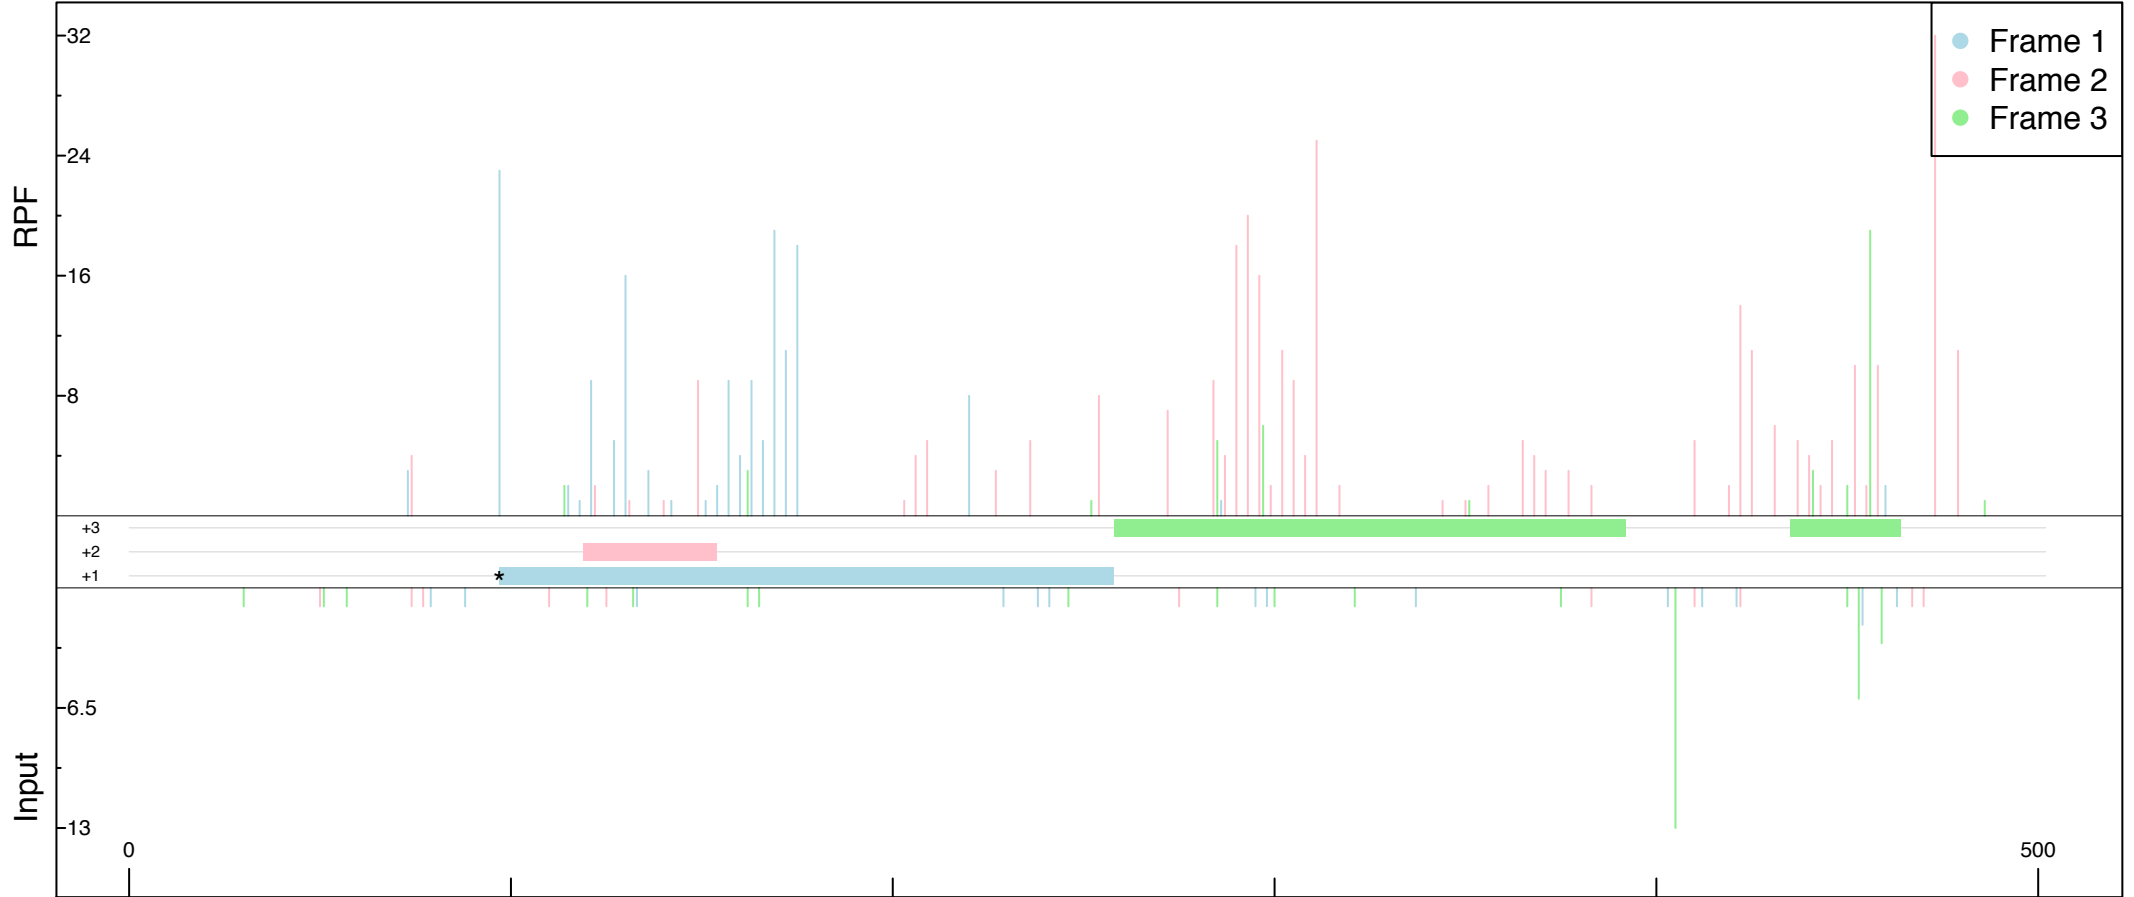

\*MKRRNRRNVETETYFEGEHLSDLKKESVENGRMWCSGDFYRFRVQTATRAGG

ENSDART00000139034, Global

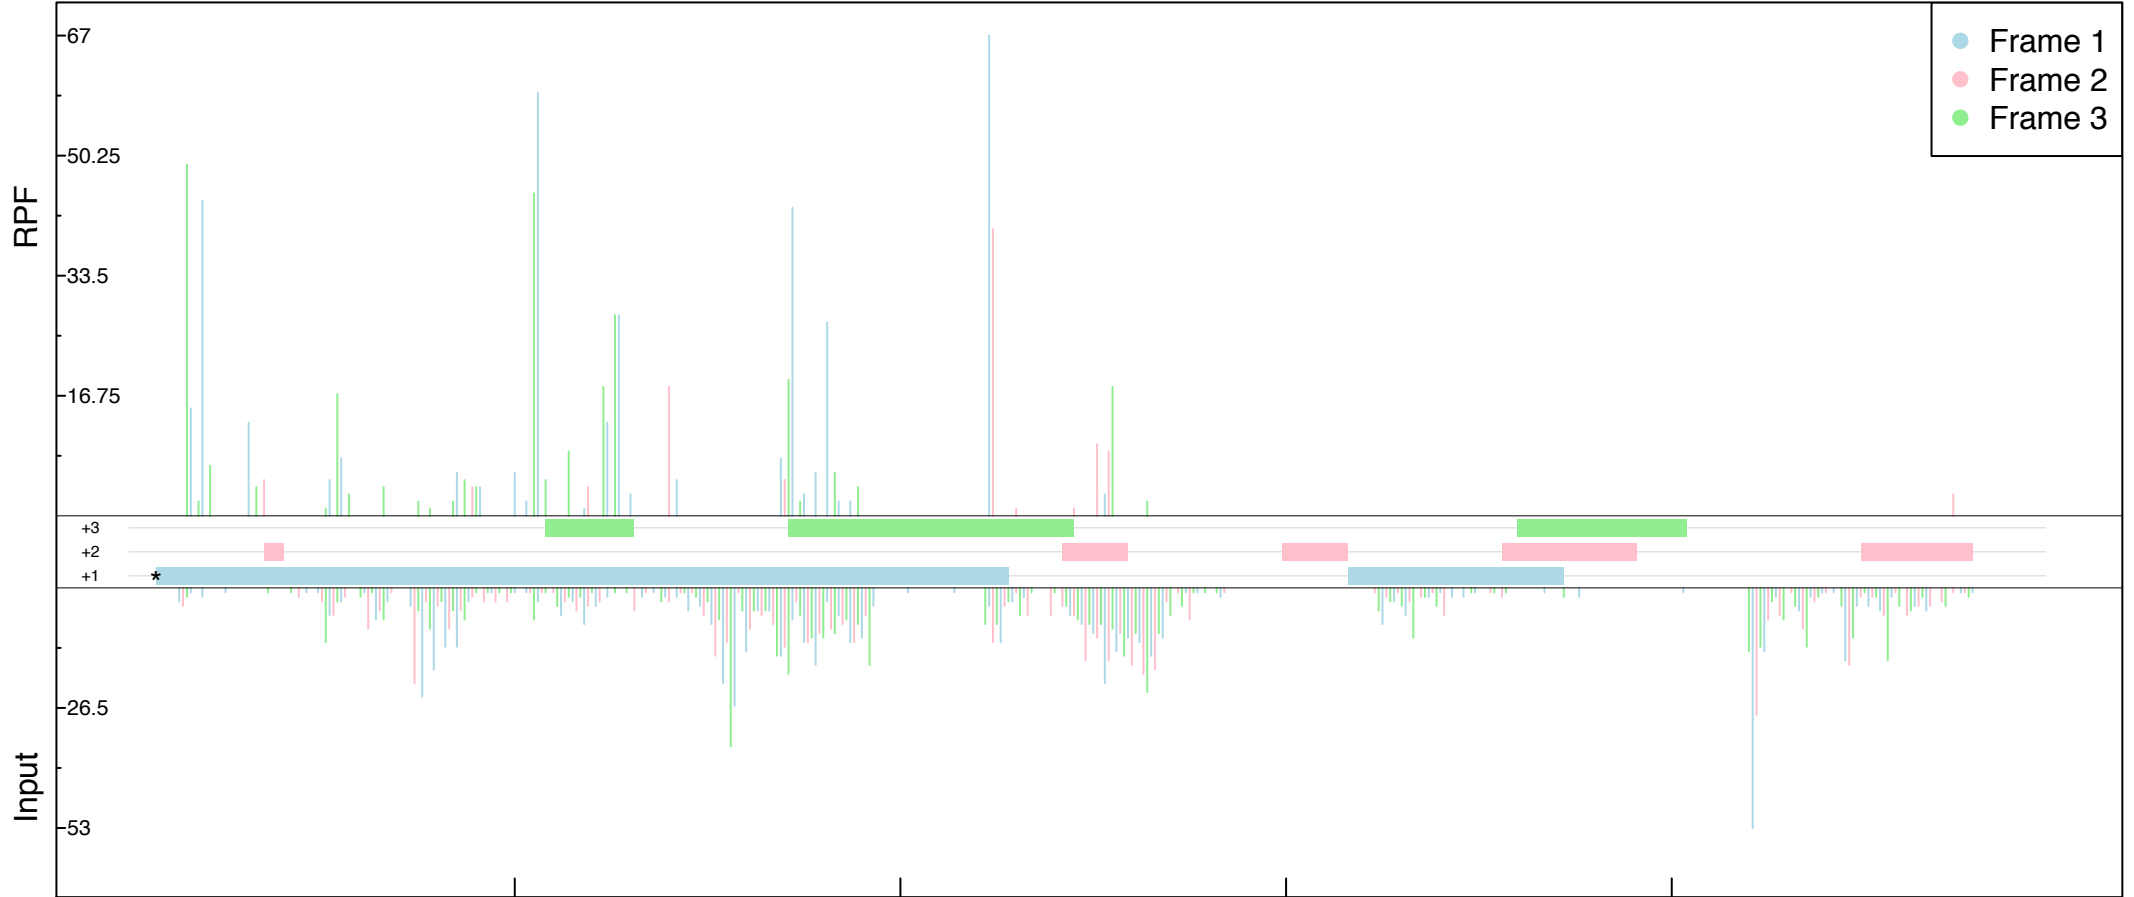

\*MLKMPFALWNVRAVLQTQFVCLCWRPEGKLSLKGWGSYTICEVTYSGAFWAPVWRWKTDEVKEAEKTPQPASV

# ENSDART00000131810, Global

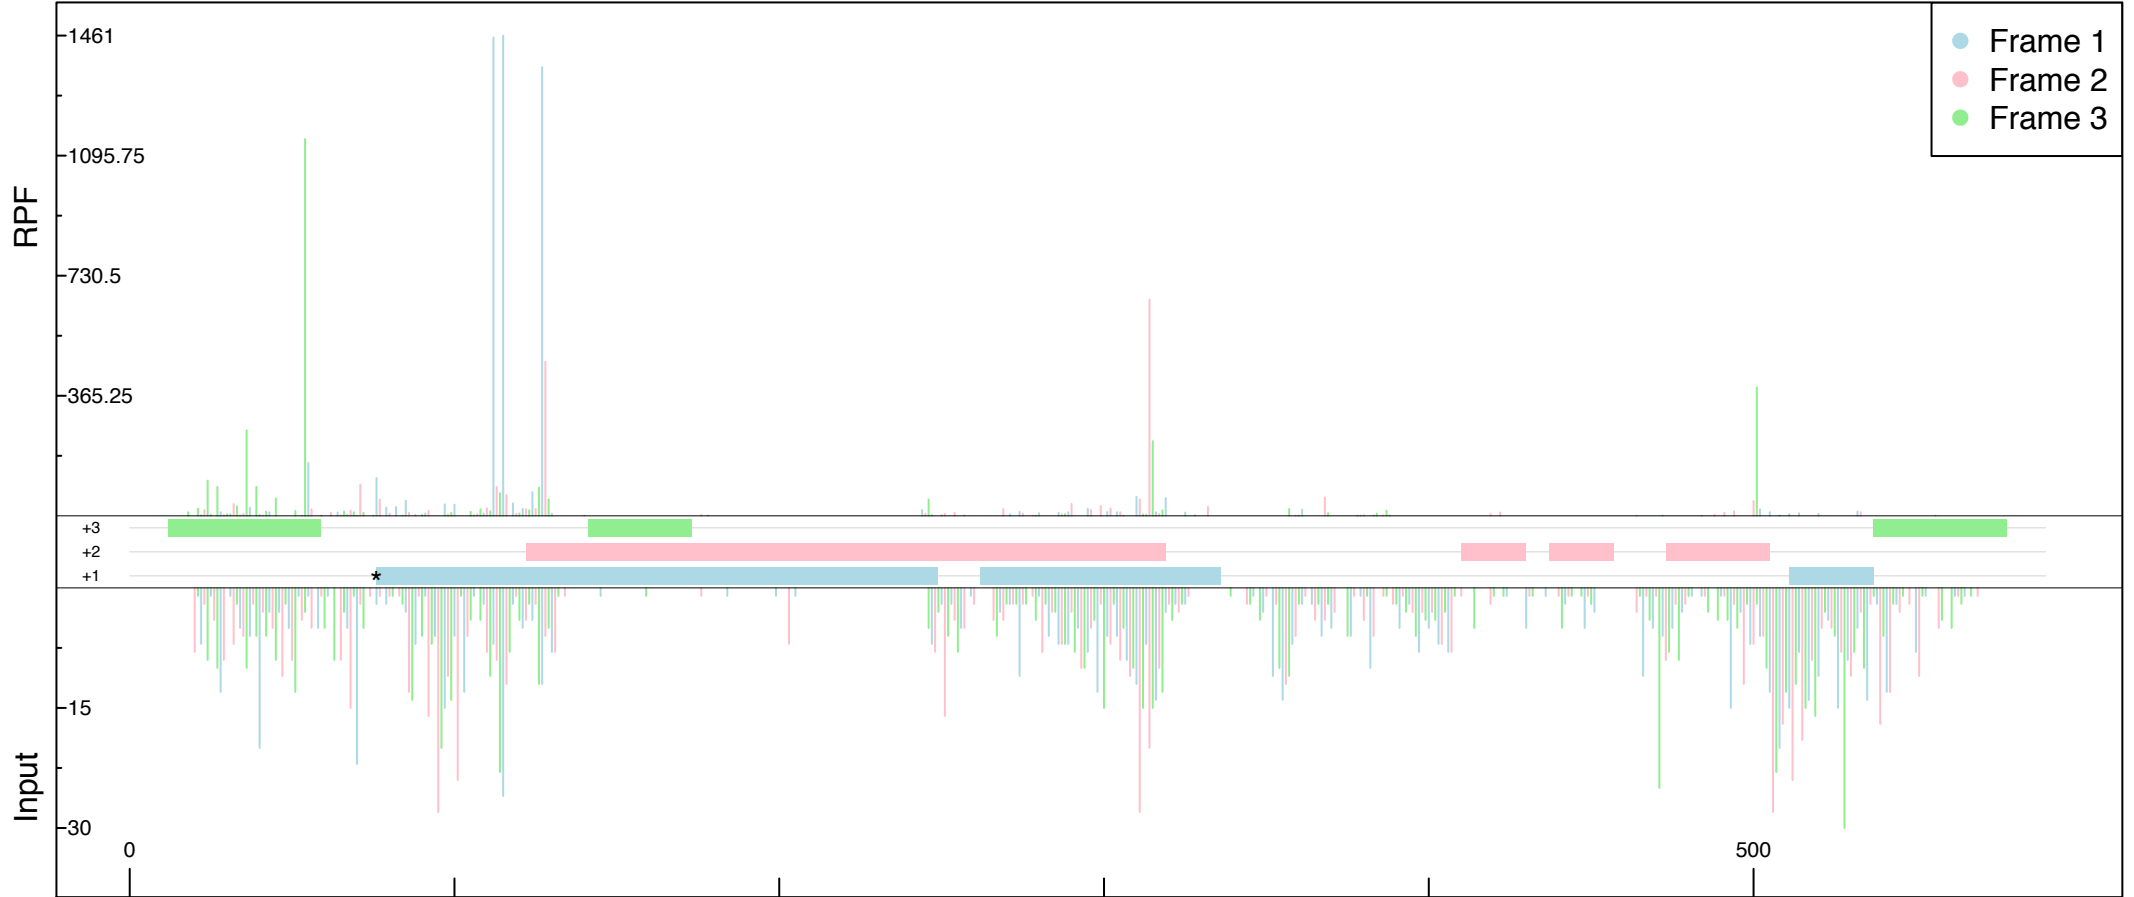

\*MKKNYLEQQRGWIKGRYEDFRNQCSTTSTITNNDYGRNLKTTIKMHRVCTFQYTSTTD

ENSDART00000141690, Global

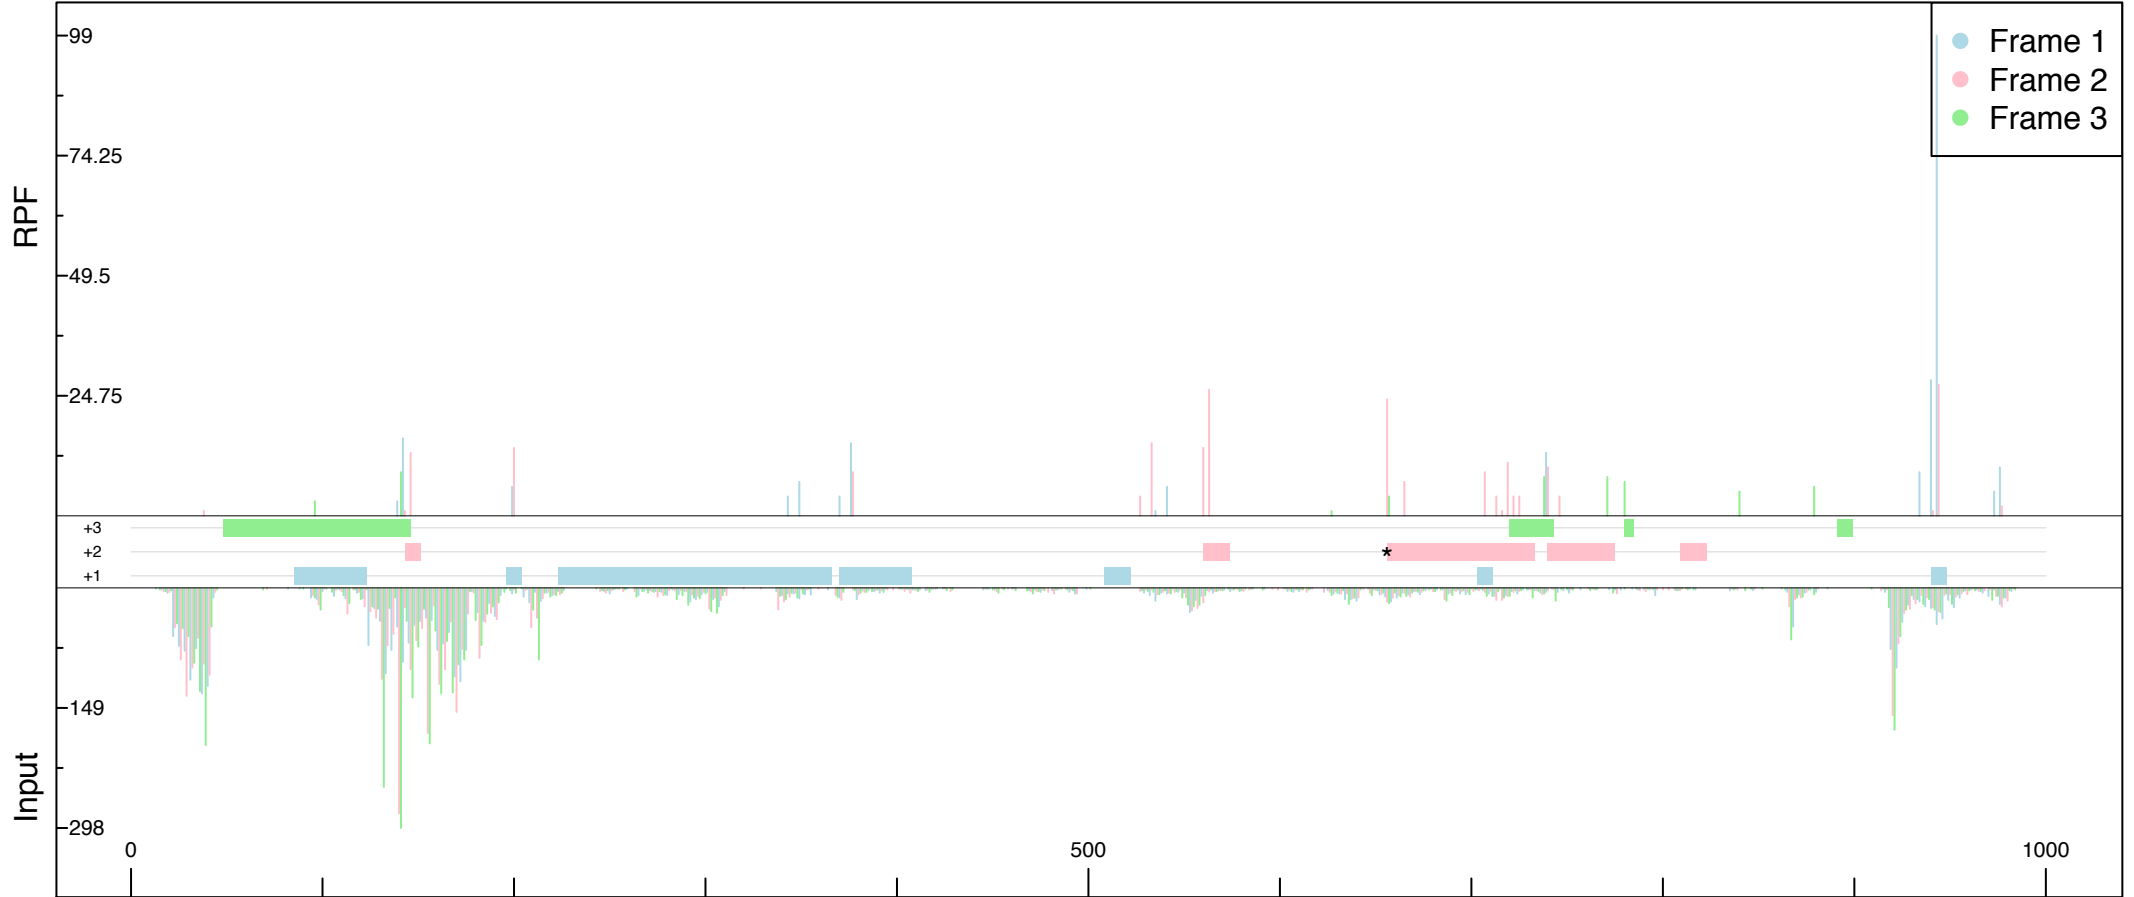

\*MLVLKKLYTRPVQDSGCRYRNPNERE

# Zv9\_00057916, Global

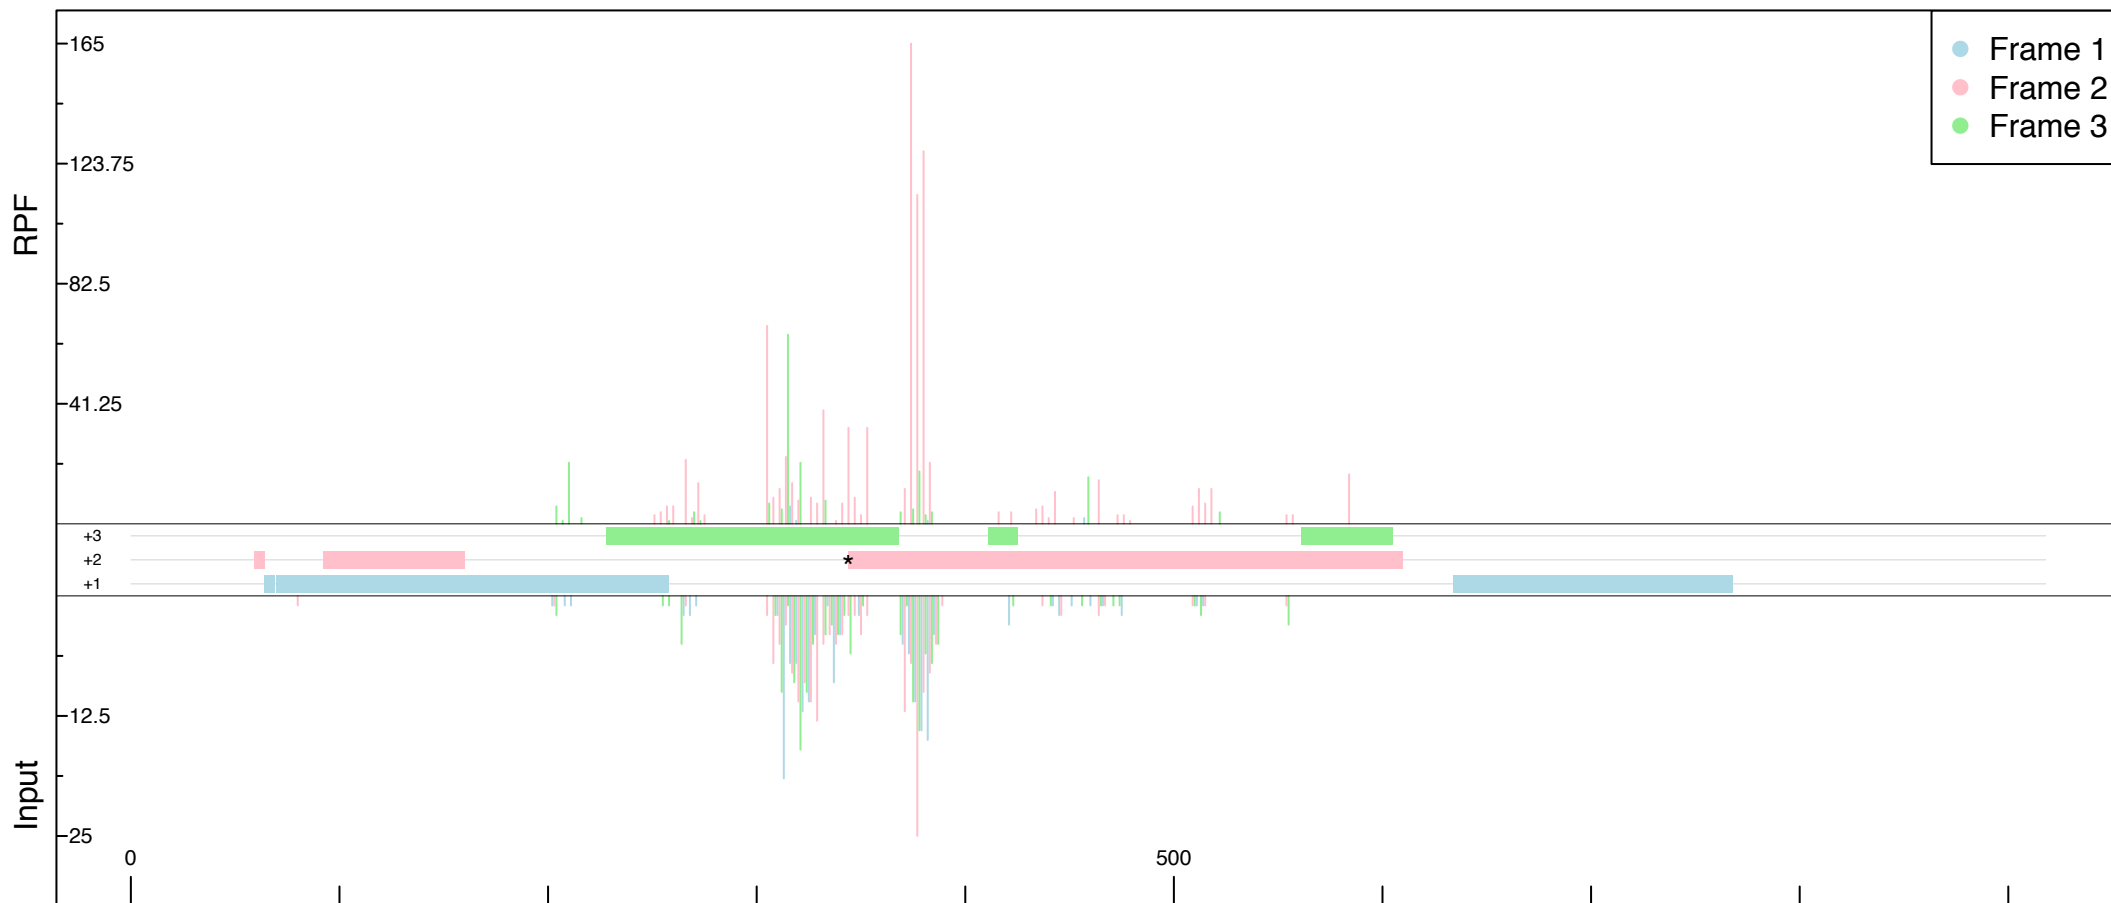

\*MPQPHAIVRKQTAAERERETSDDSDVTVTREPTPERDPCVPELIRTESVILTMEILERGTEESNAGPEMSEDDCNRSGQDVSSEKVK

# ENSDART00000137336, Global

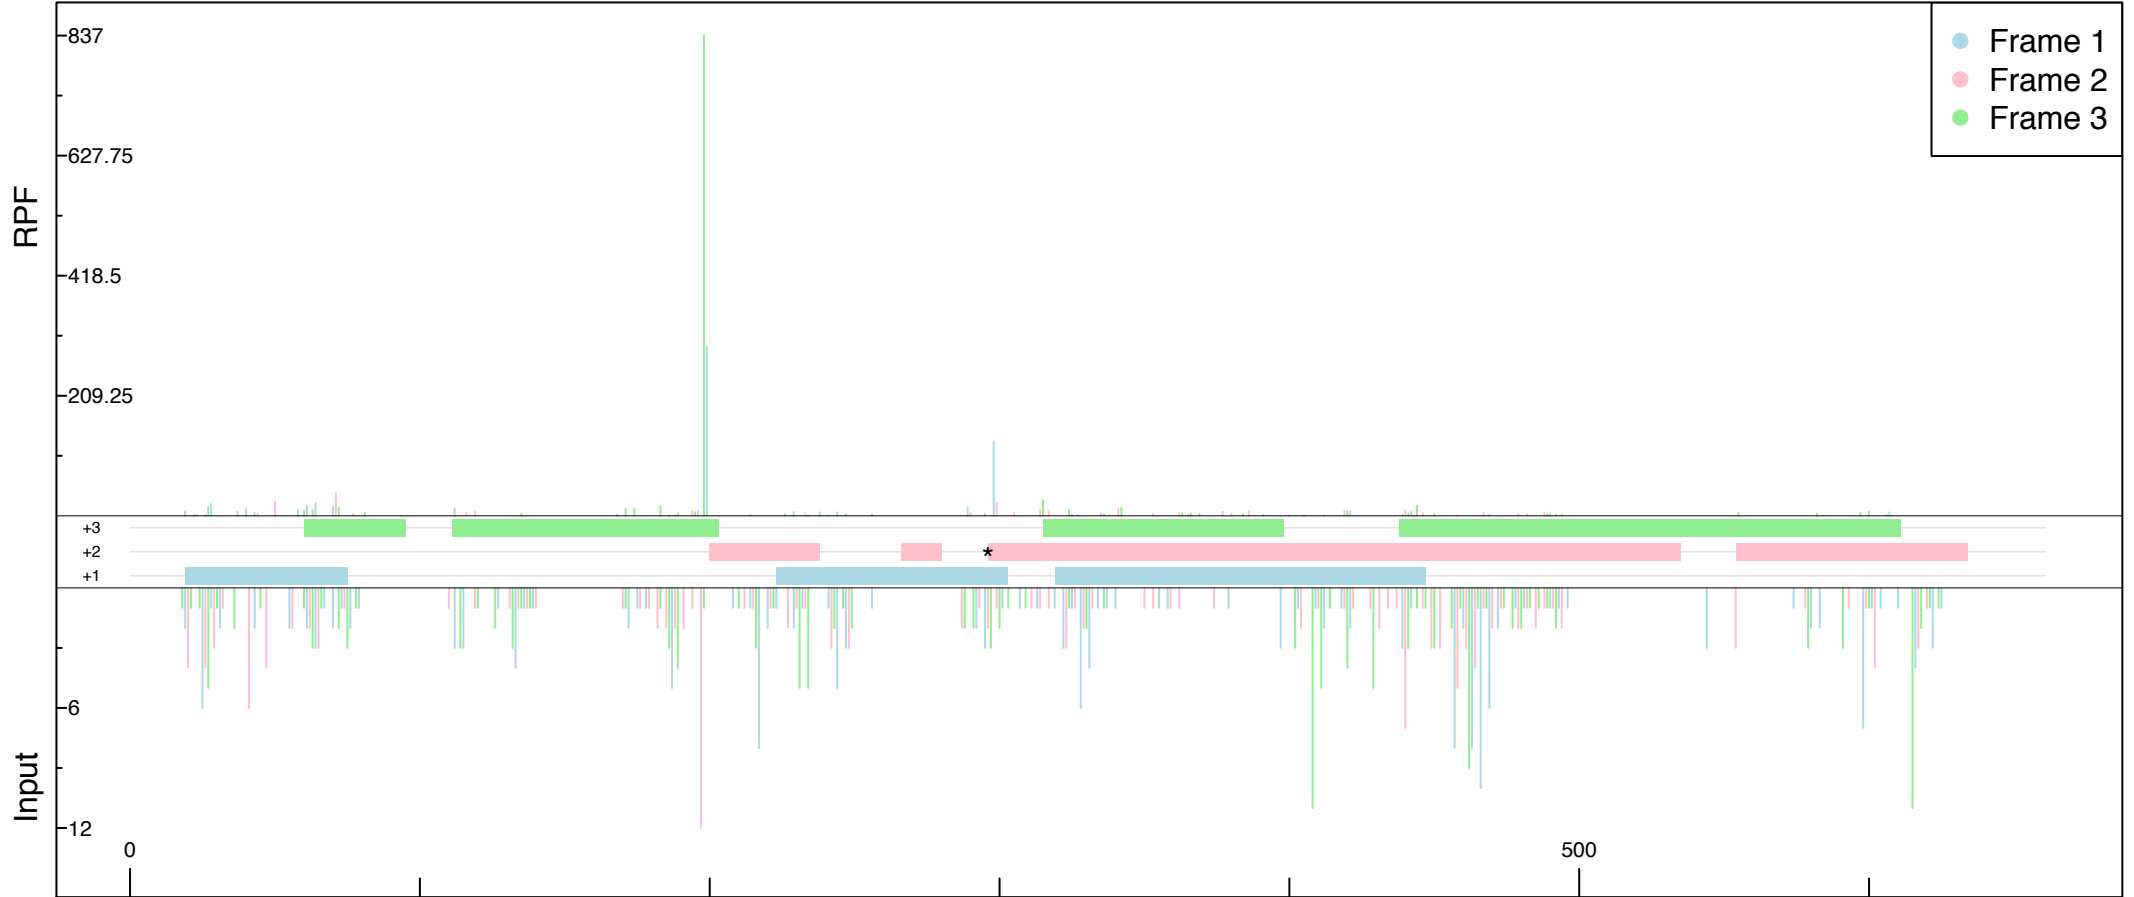

\*MSKEPHYGCNVGLYTGRKSGYGLCHMQYVSFFALIYTLNSDYPKTLSNAFEFVQRVLLLLGGKRNVFYSASACILLCFV

ENSDART00000136659, Global

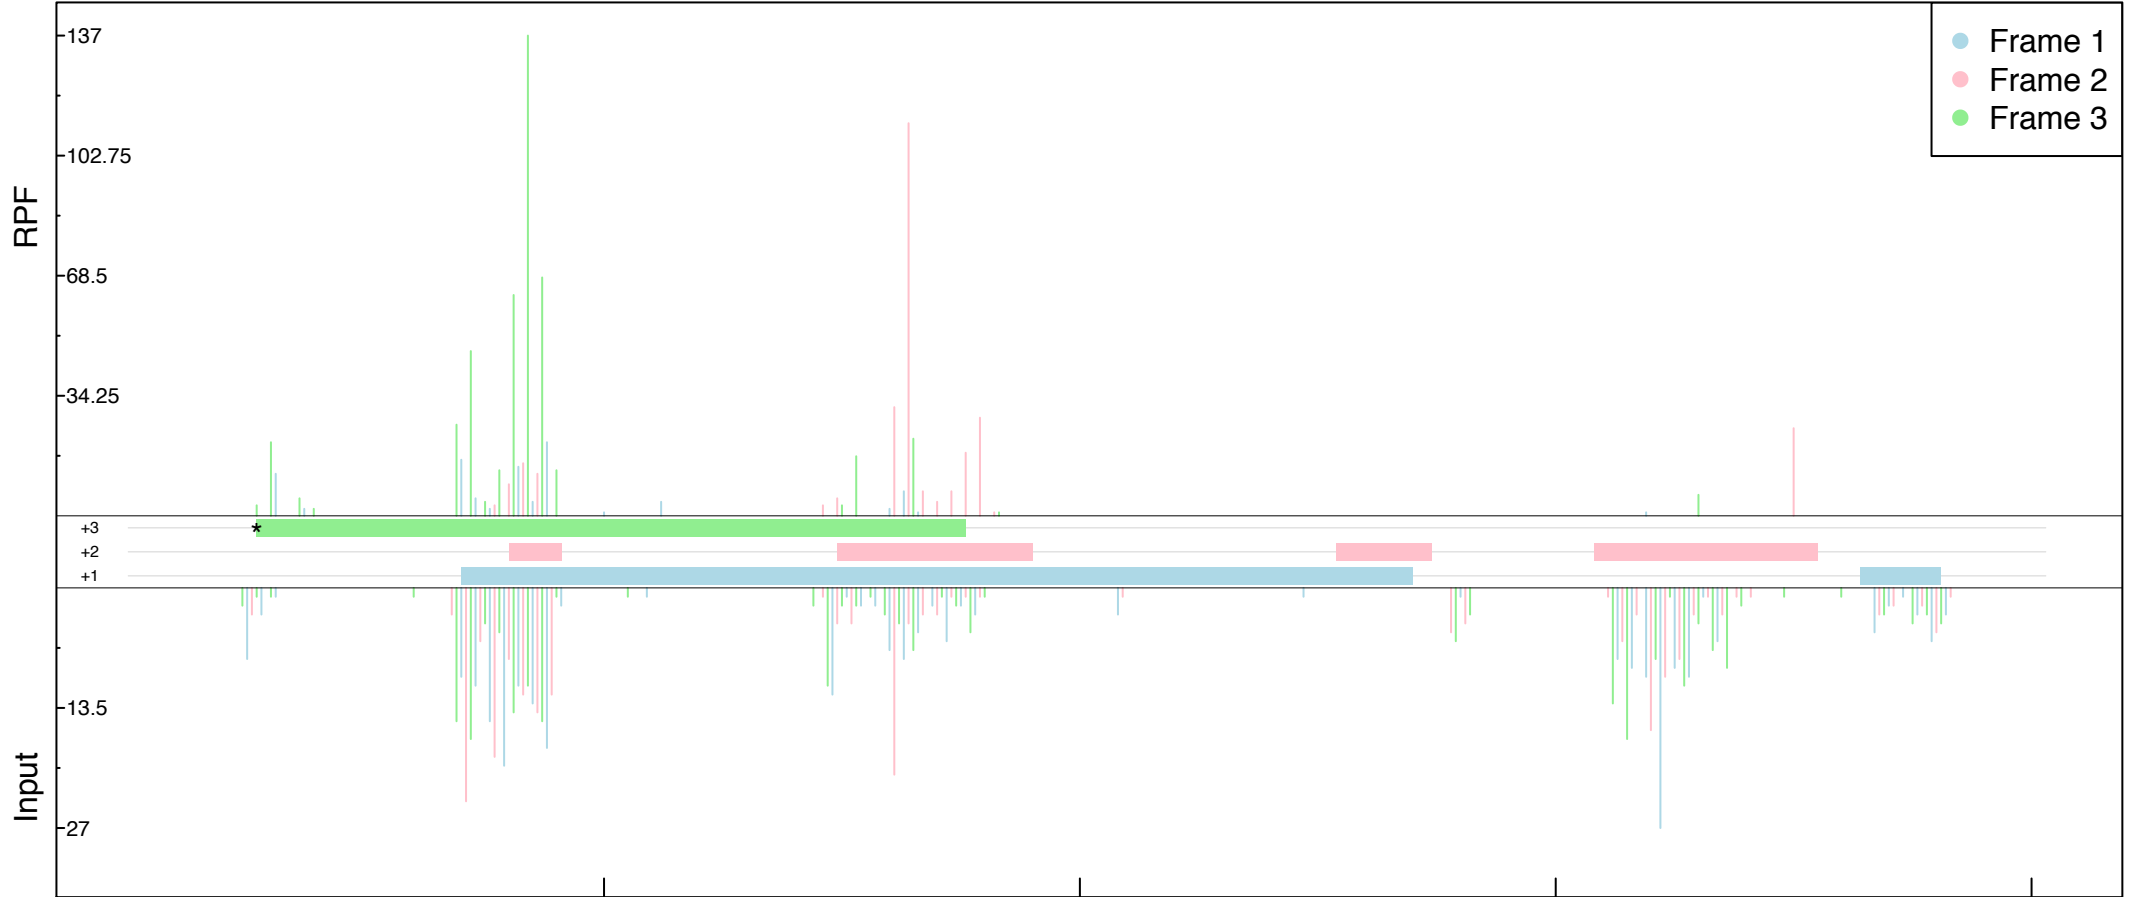

\*MAESSIFTRFLRVNYGQRCANDCPDVHCNTAEQTCERFQVLCIFLPVQL



linc-loc100003902, Global

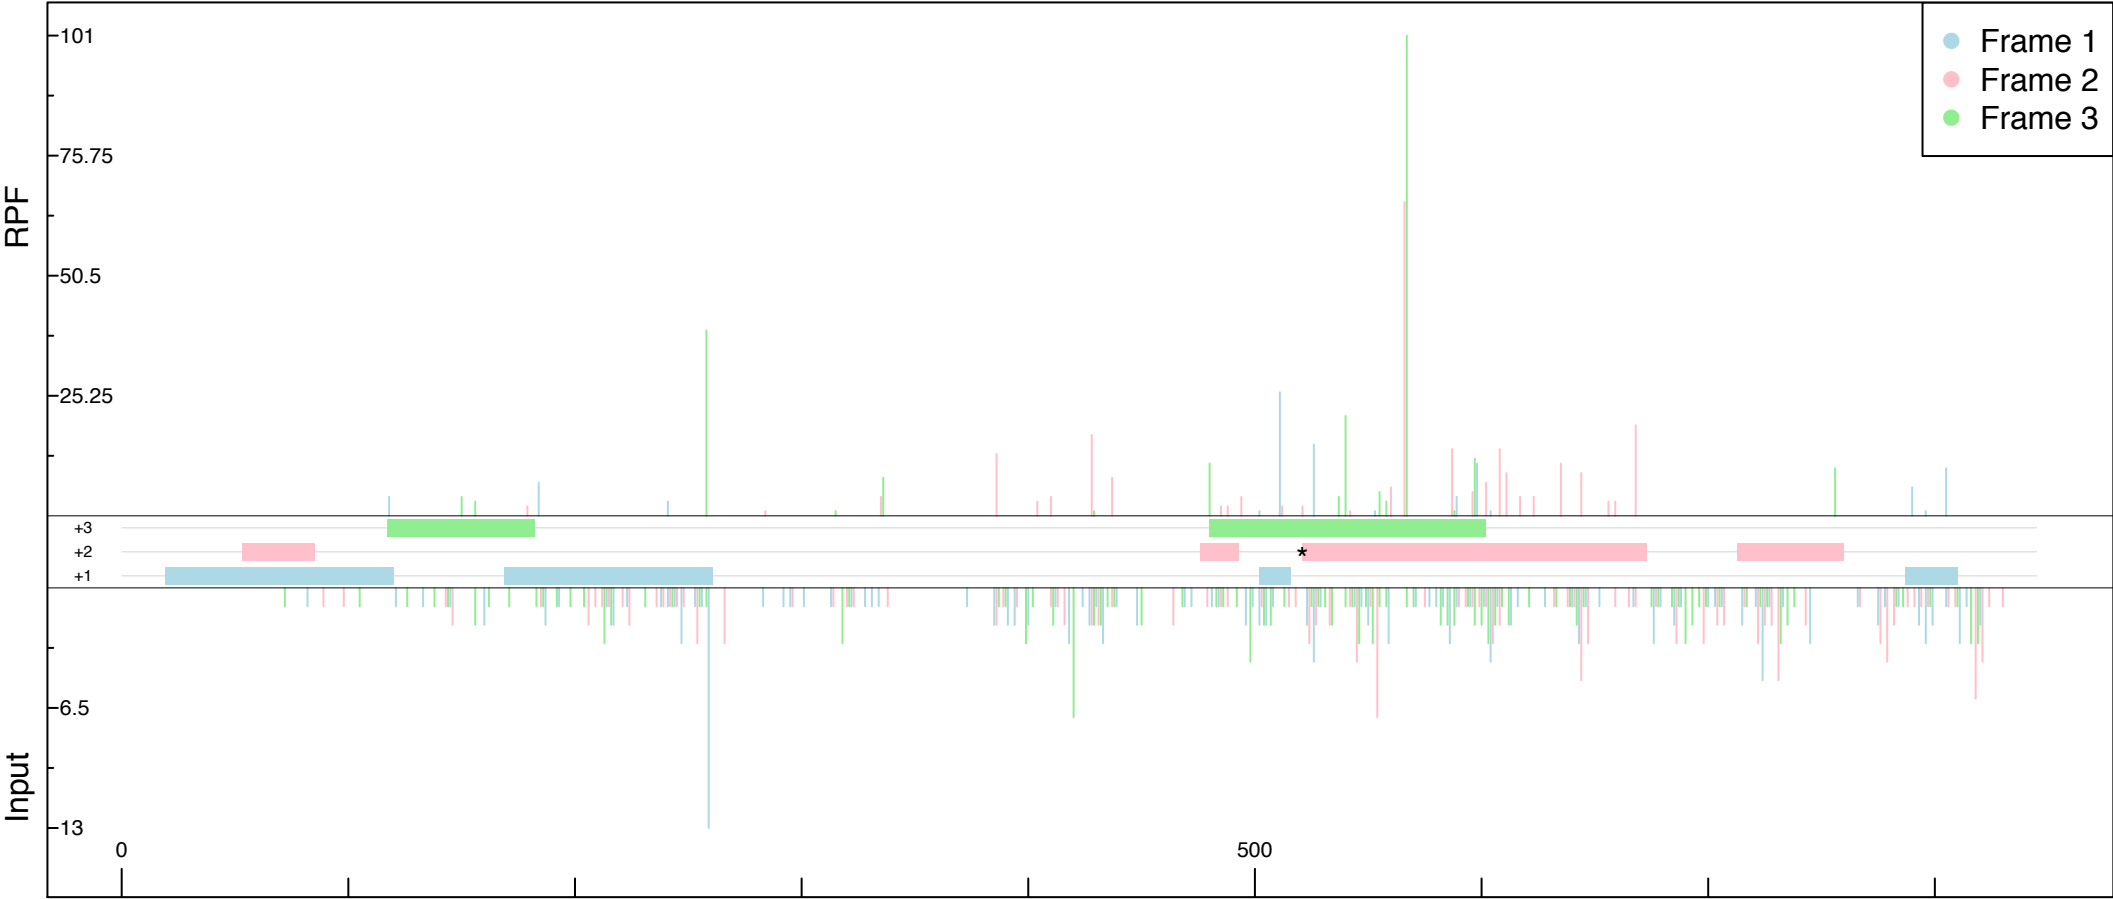

\*MPSSYLDDRDLETKHLGSHNTNCPVFRVNWFLTYSKPVIMSPVNDLKKHSF

ENSDART00000134784, Global

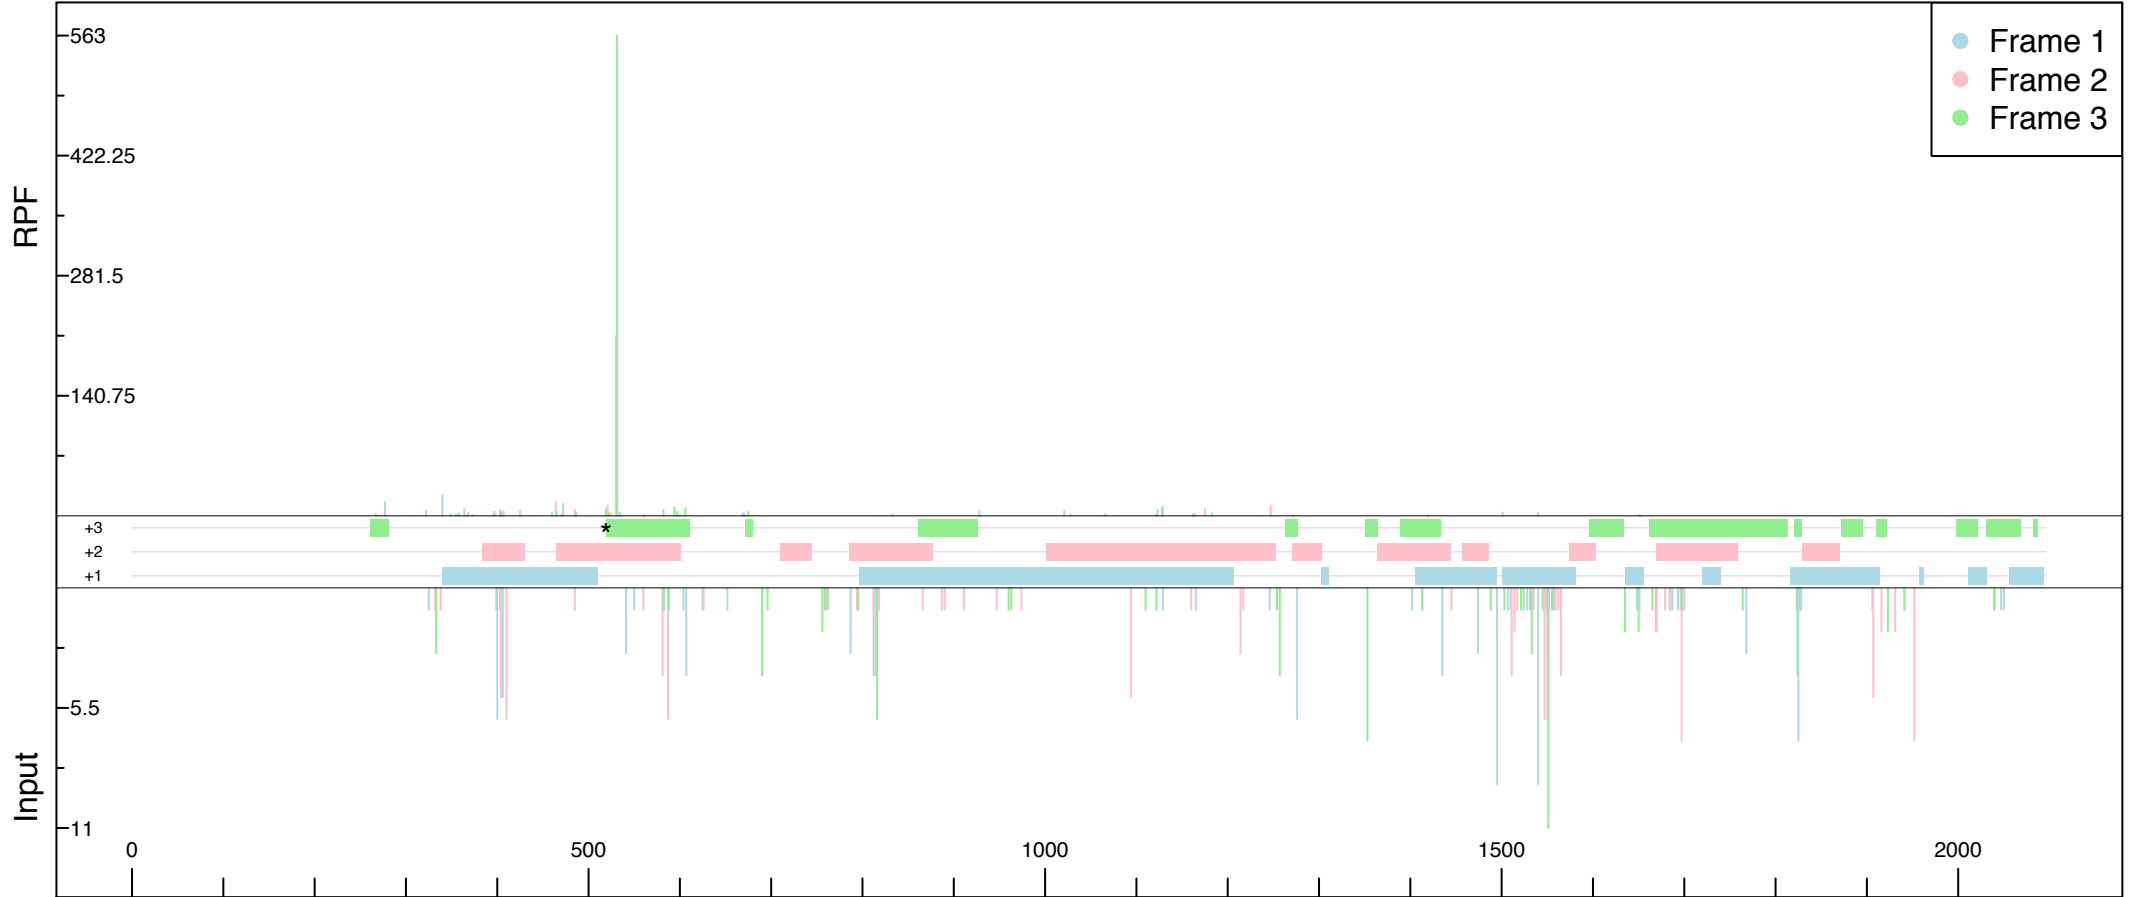

\*MVNLTECIHQPSPTKSELQGGQLVLKVPELD

ENSDART00000138271, Global

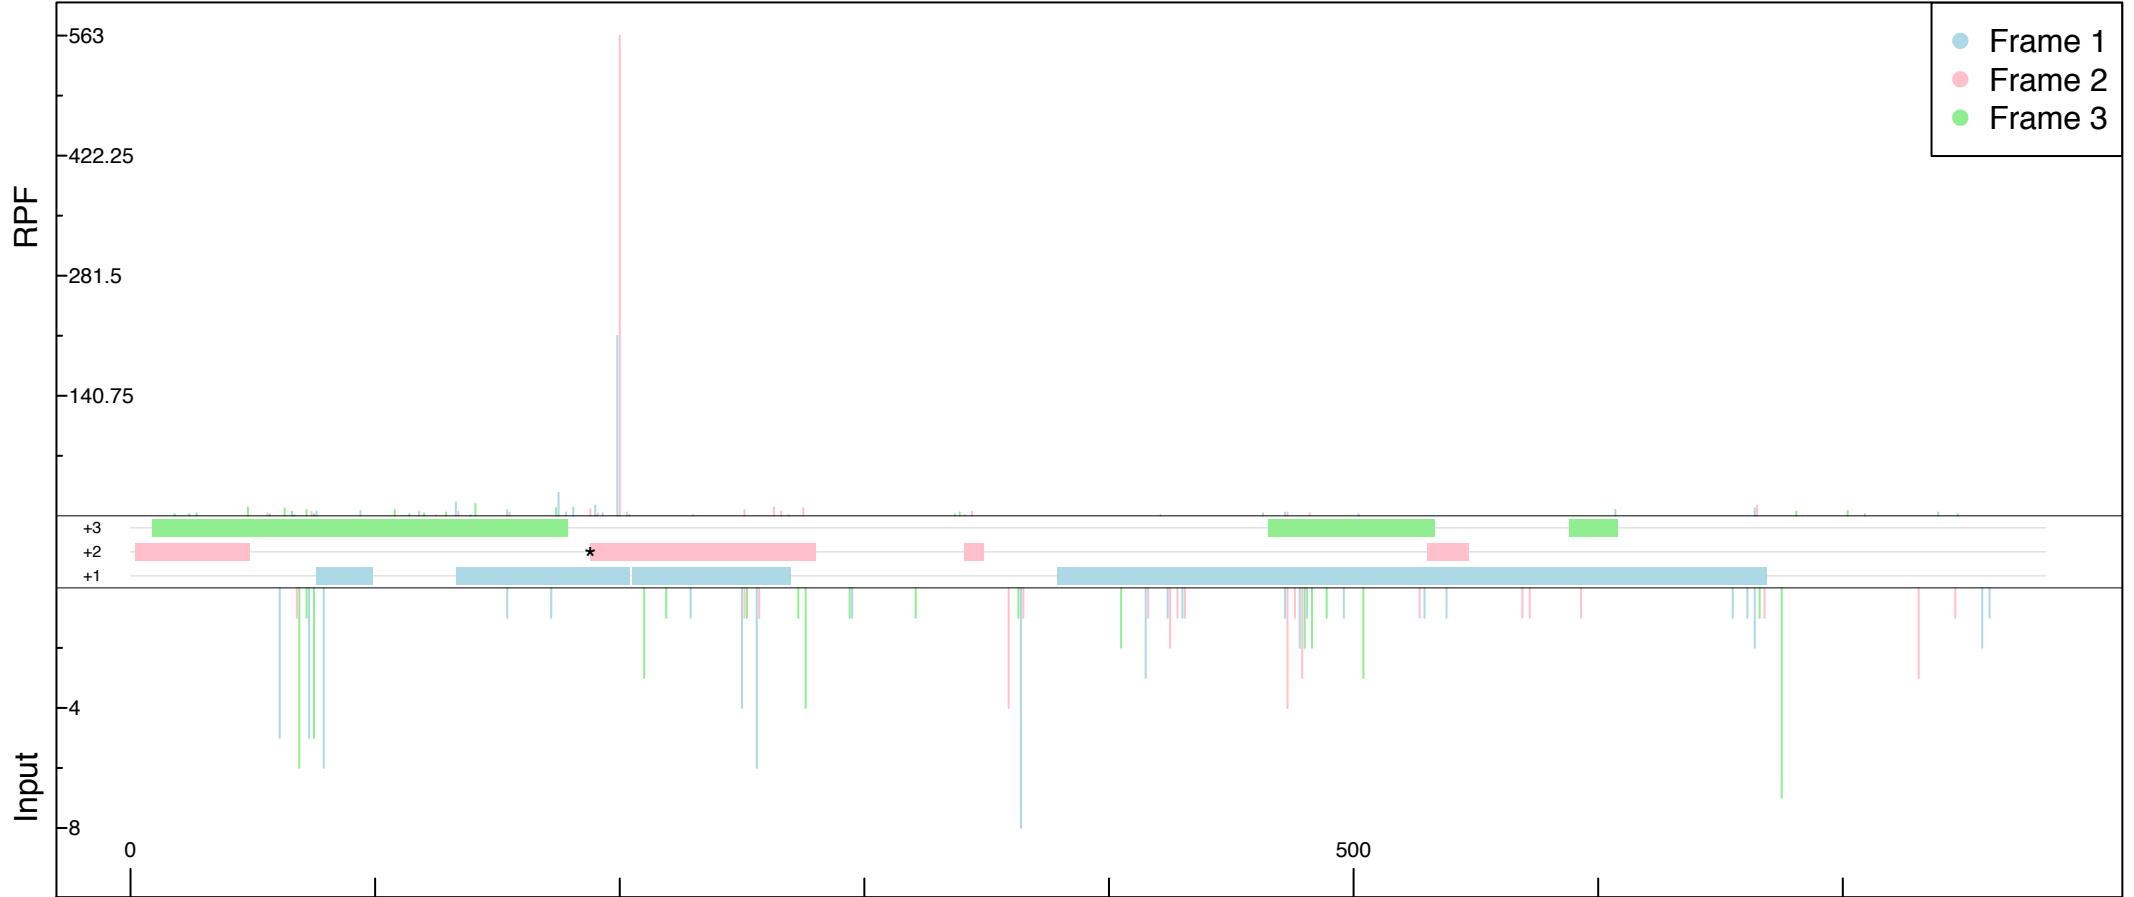

\*MVNLTECIHQPSPTKSELQGQLVLKVPELD

ENSDART00000136917, Global

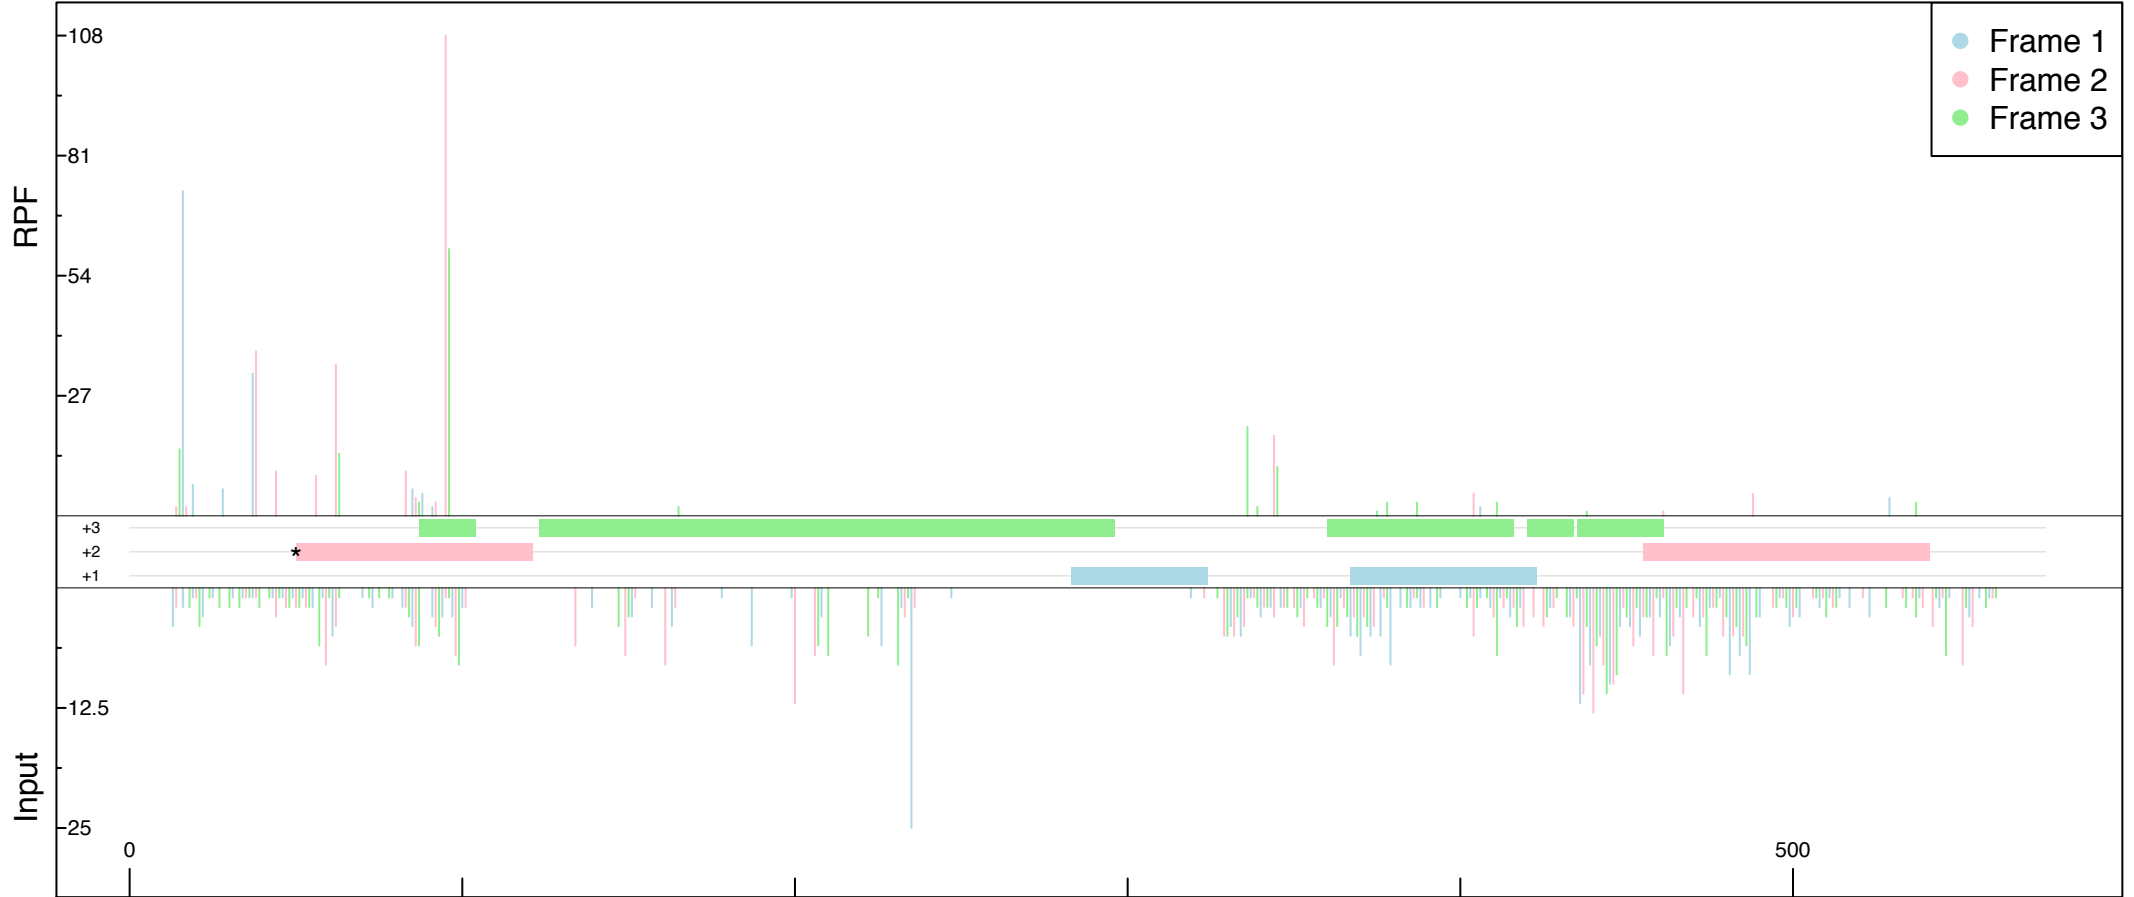

\*MSFEGHHNKHMQYGECFLNCFLK

linc-msi2a, Global

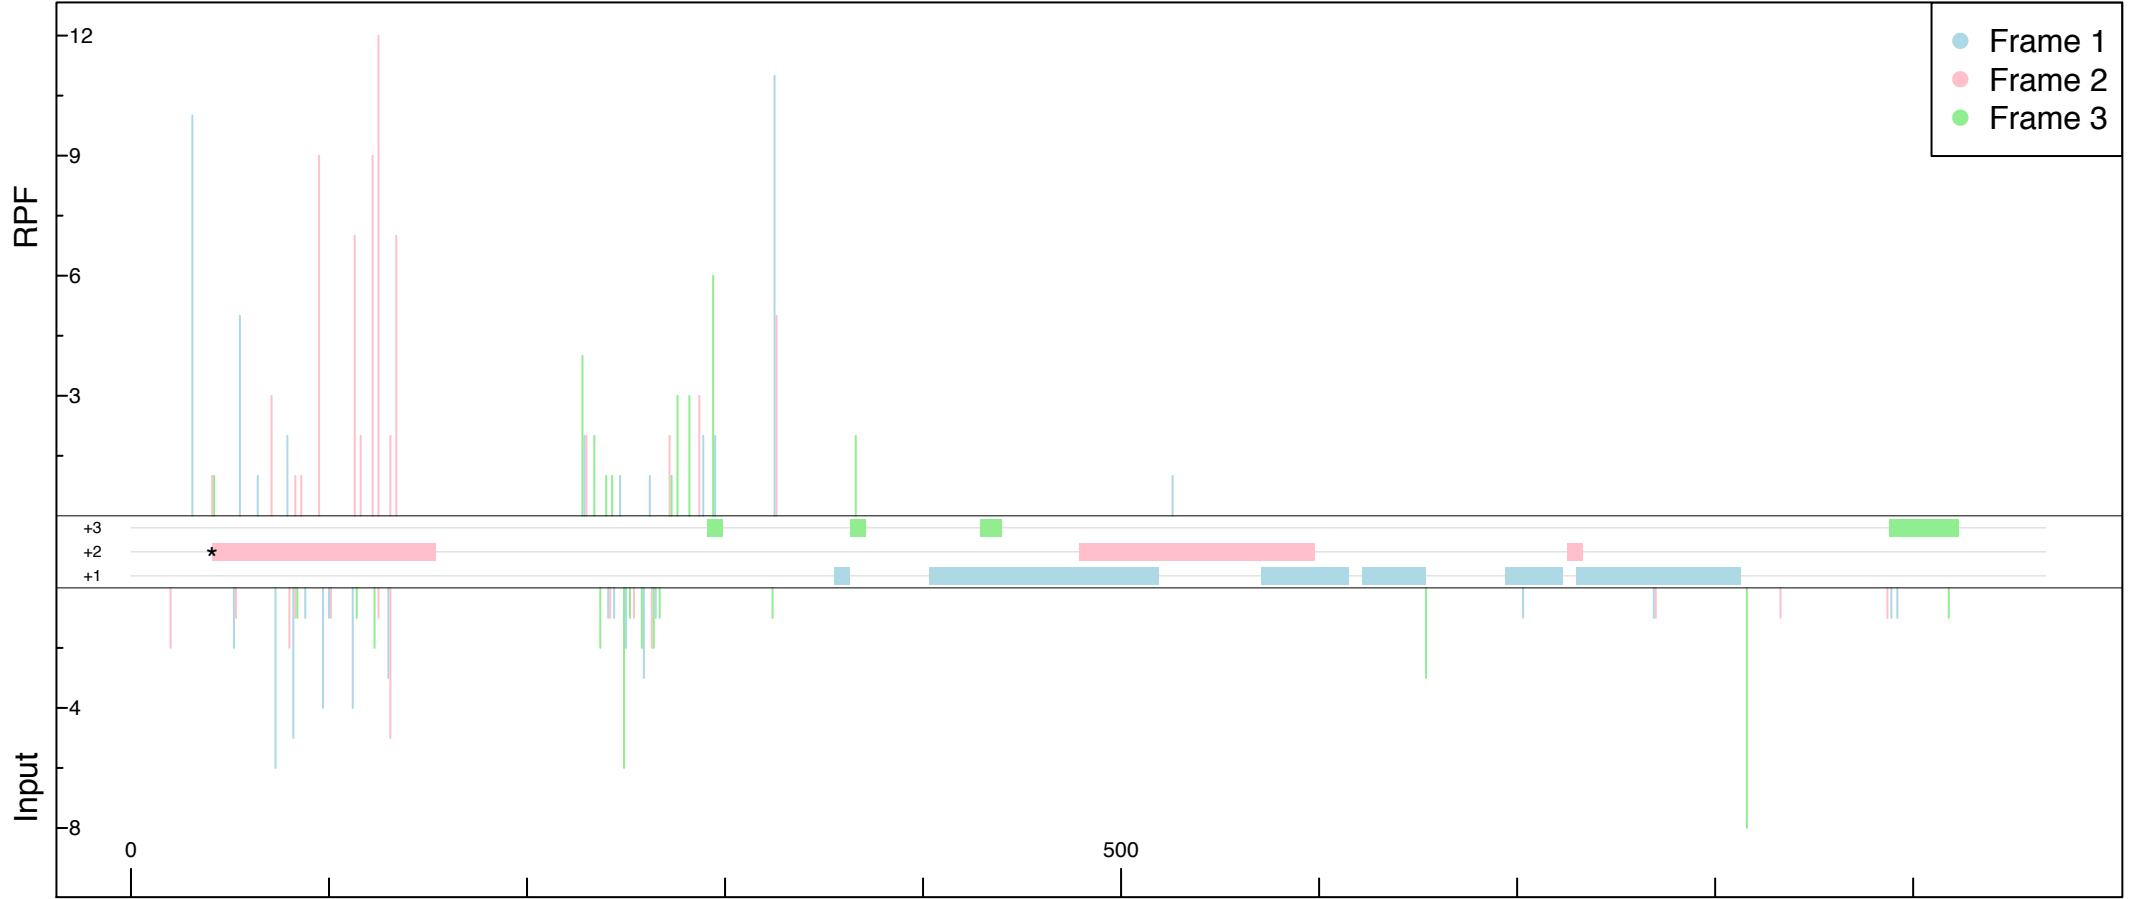

\*MGSTPFTAKKLFGLRSTHHPQIHTRSLRPICKAAYKS

ENSDART00000142576, Global

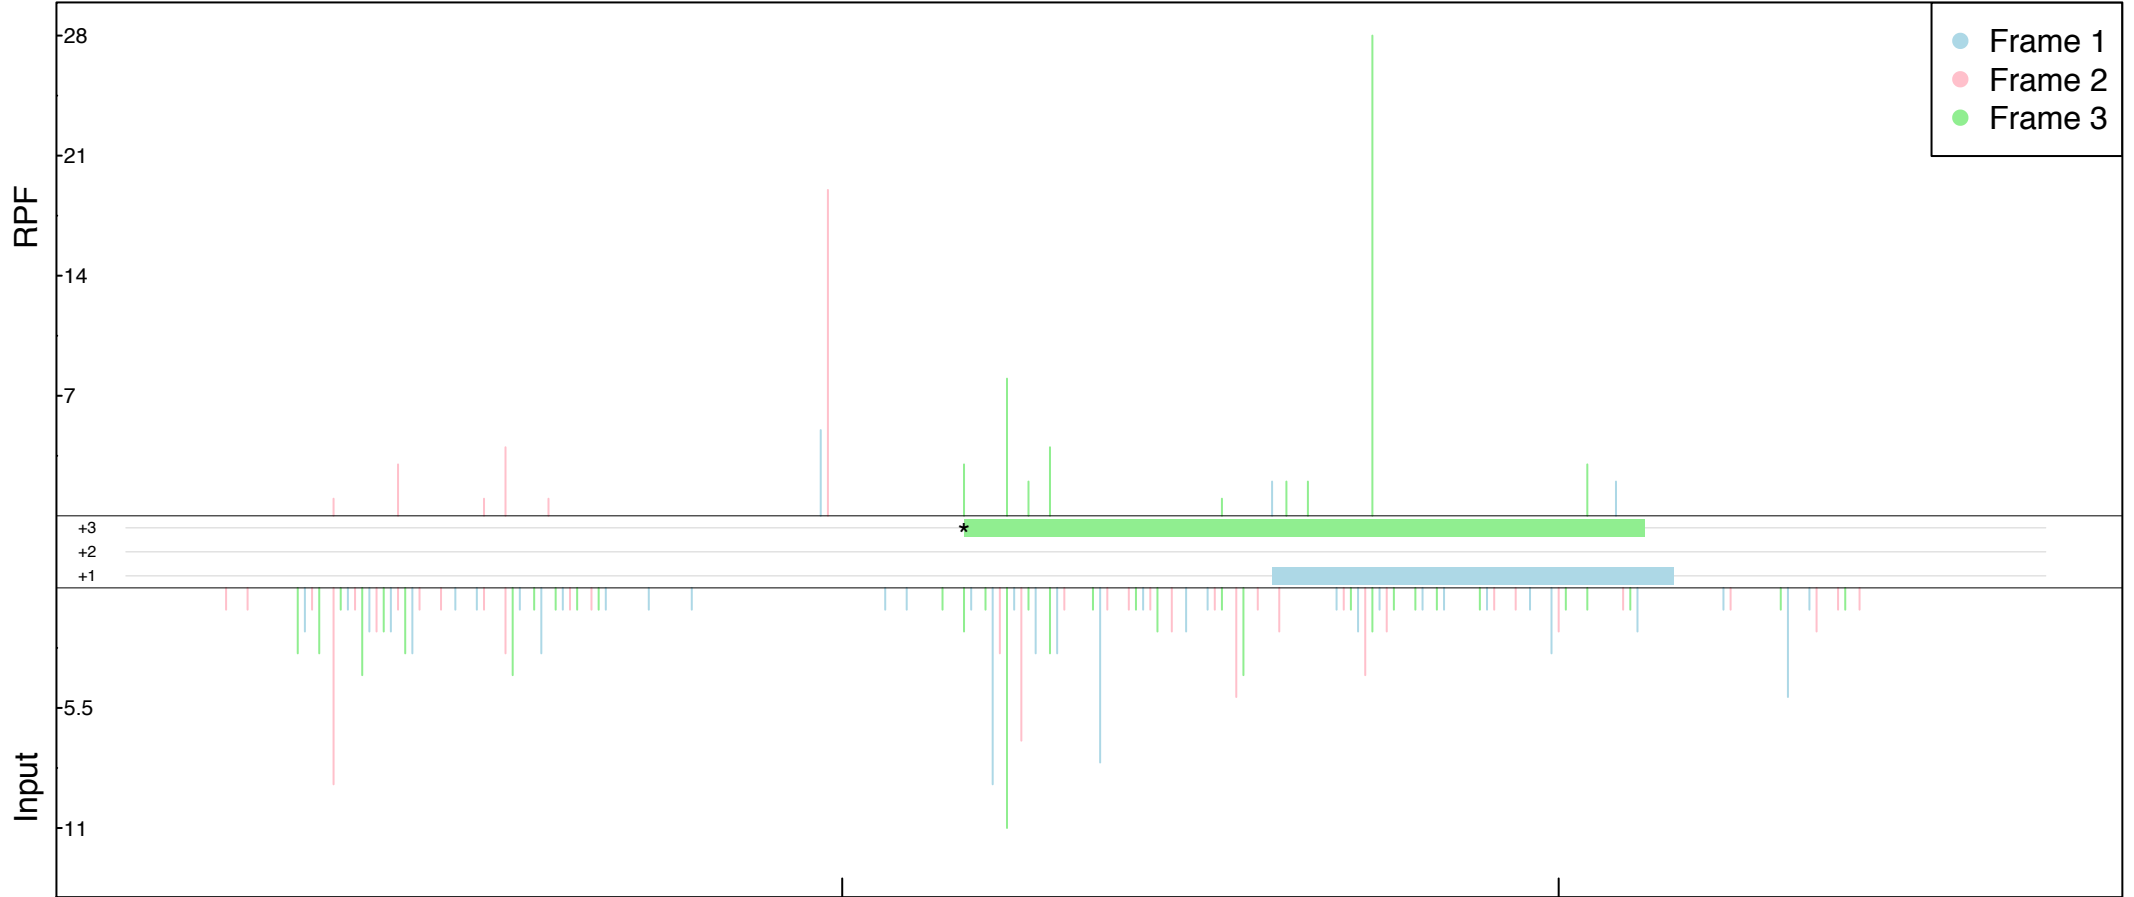

\*MACAHQHLWTLQNMHATCALLFSLPLSYPLS

ENSDART00000145470, Global

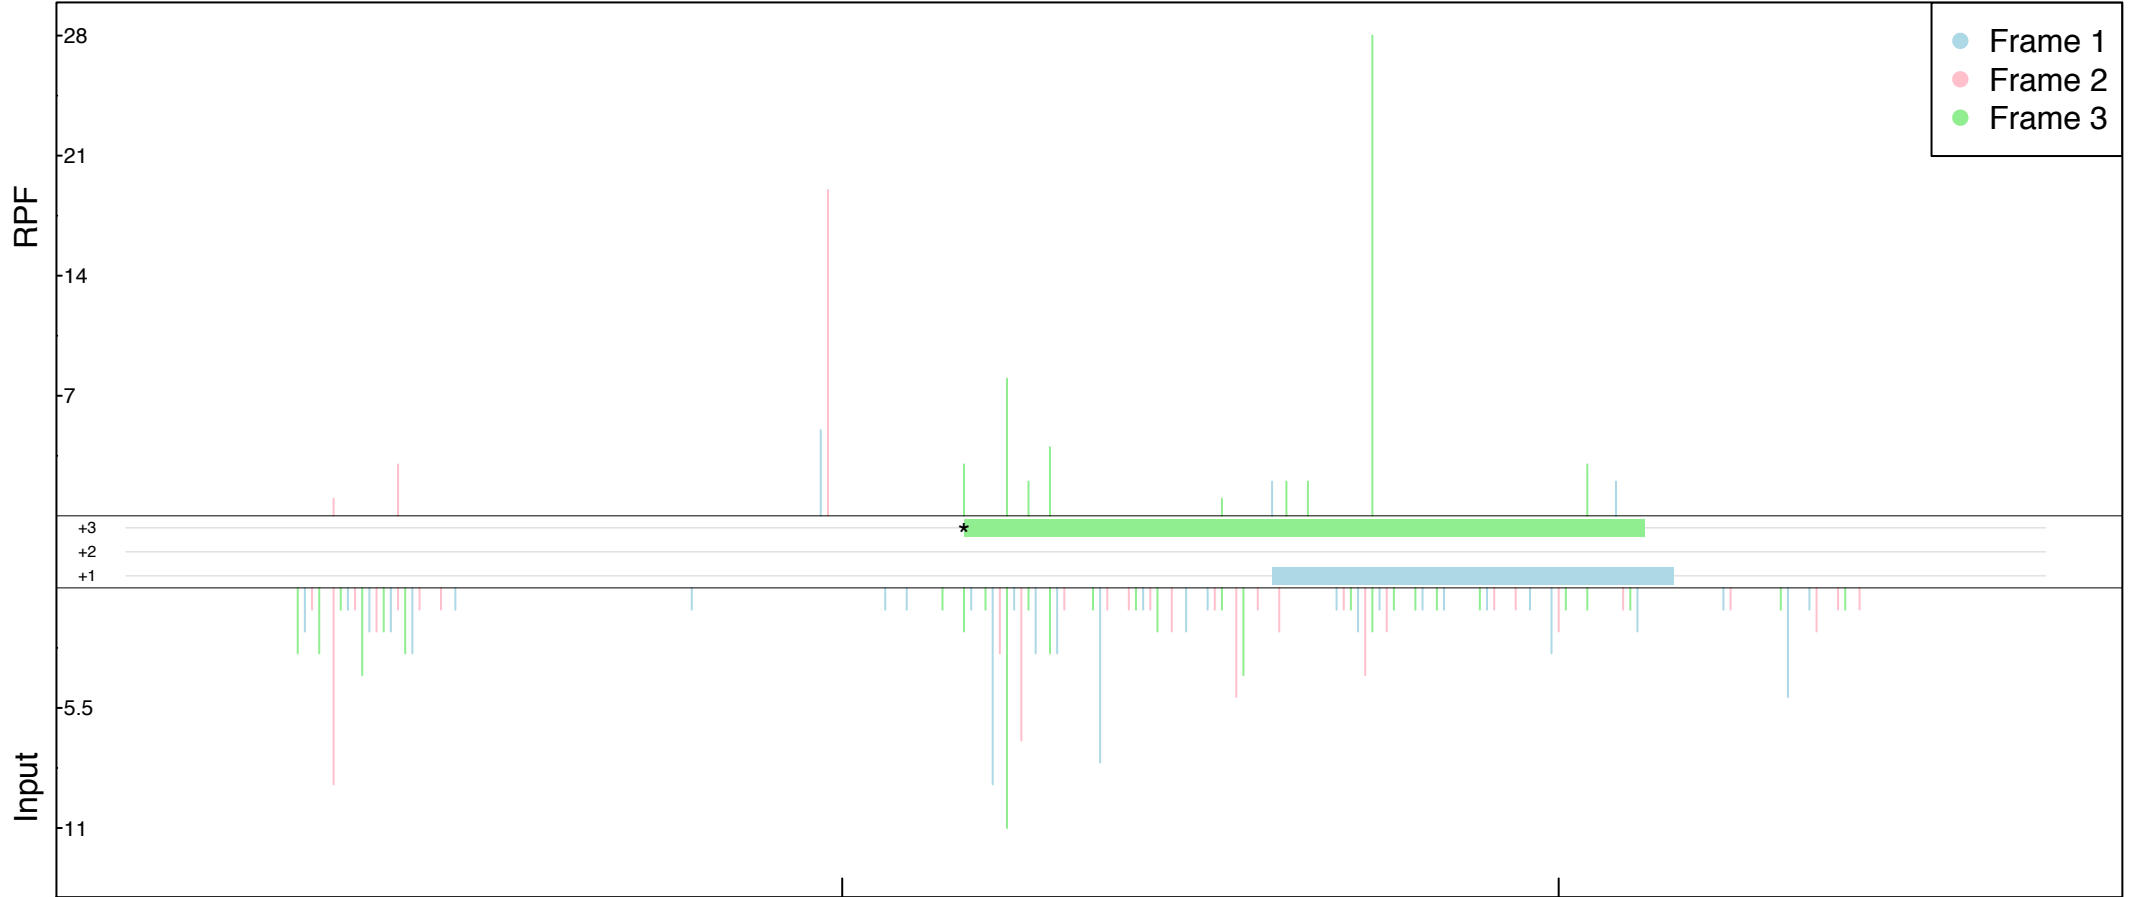

\*MACAHQHLWTLQNMHATCALLFSLPLSYPLS

ENSDART00000132085, Global

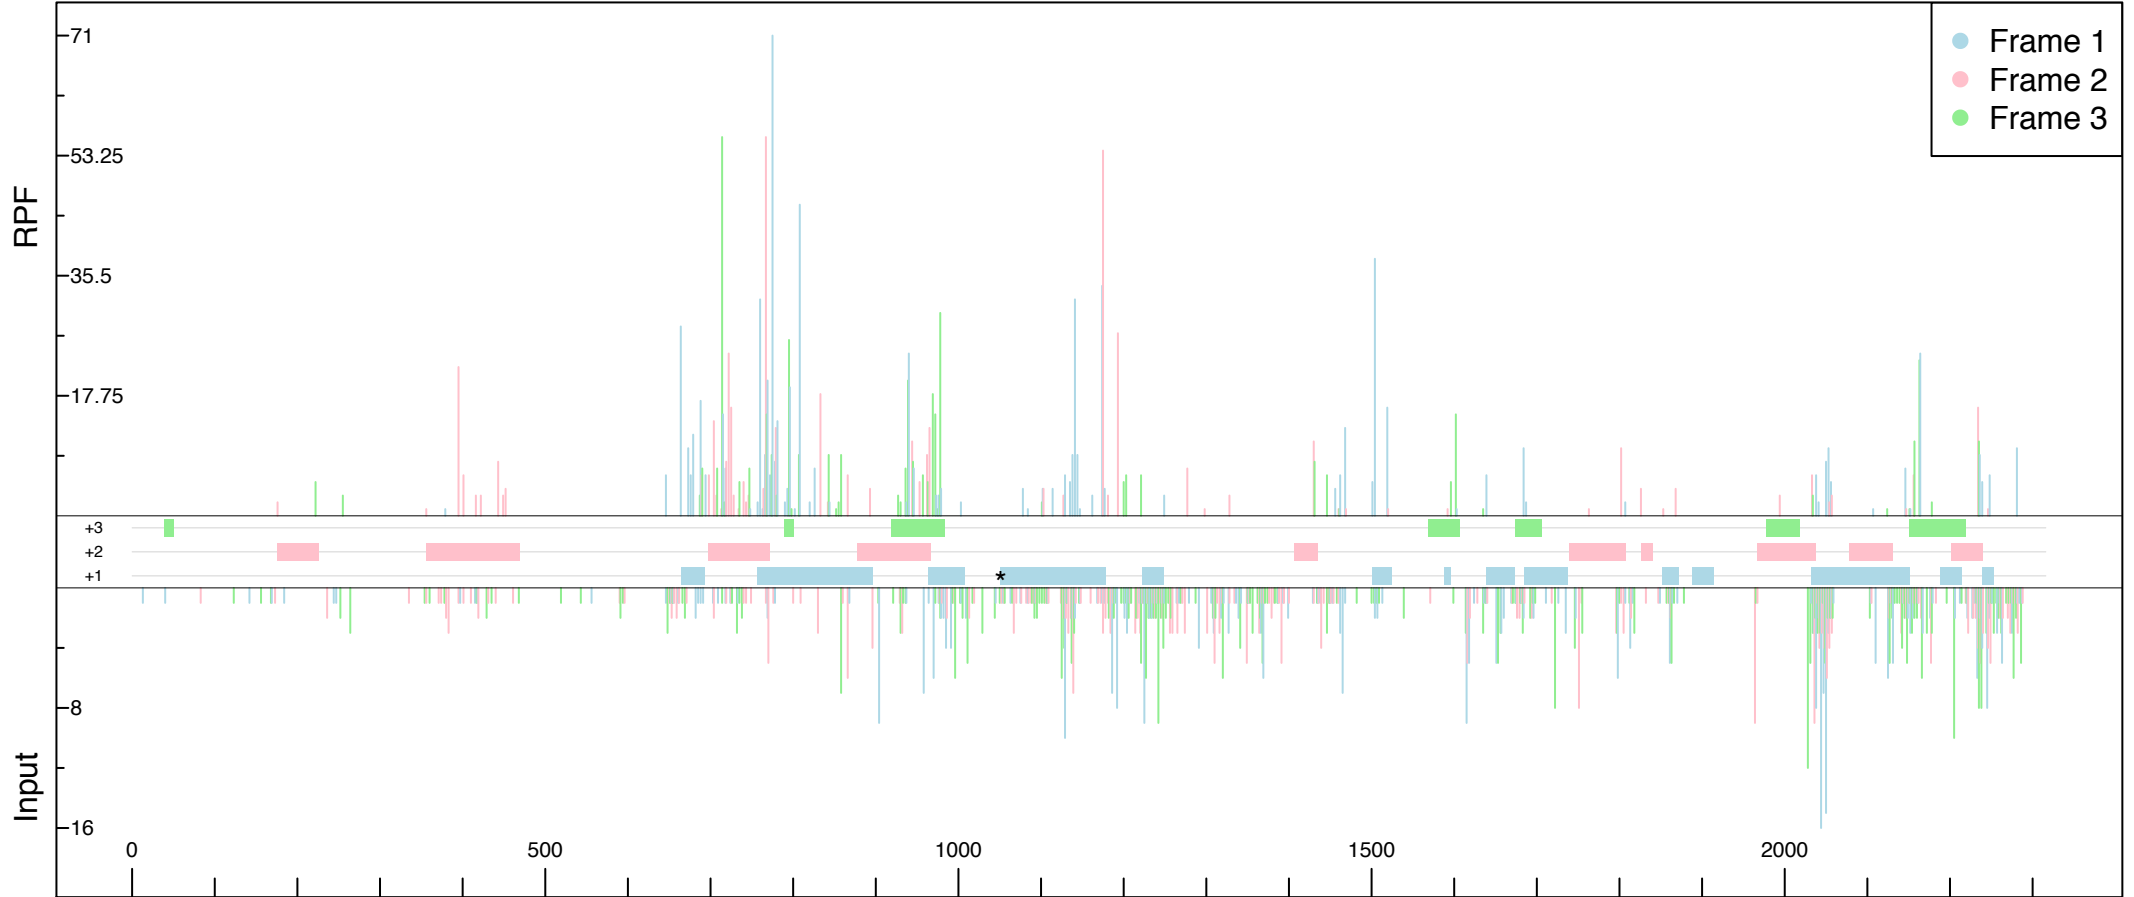

\*MFSSLETTTSFKPLLTCCAIIYYCKVHYLPKWTFAIKHSTSLV



# ENSDART00000139796, Global

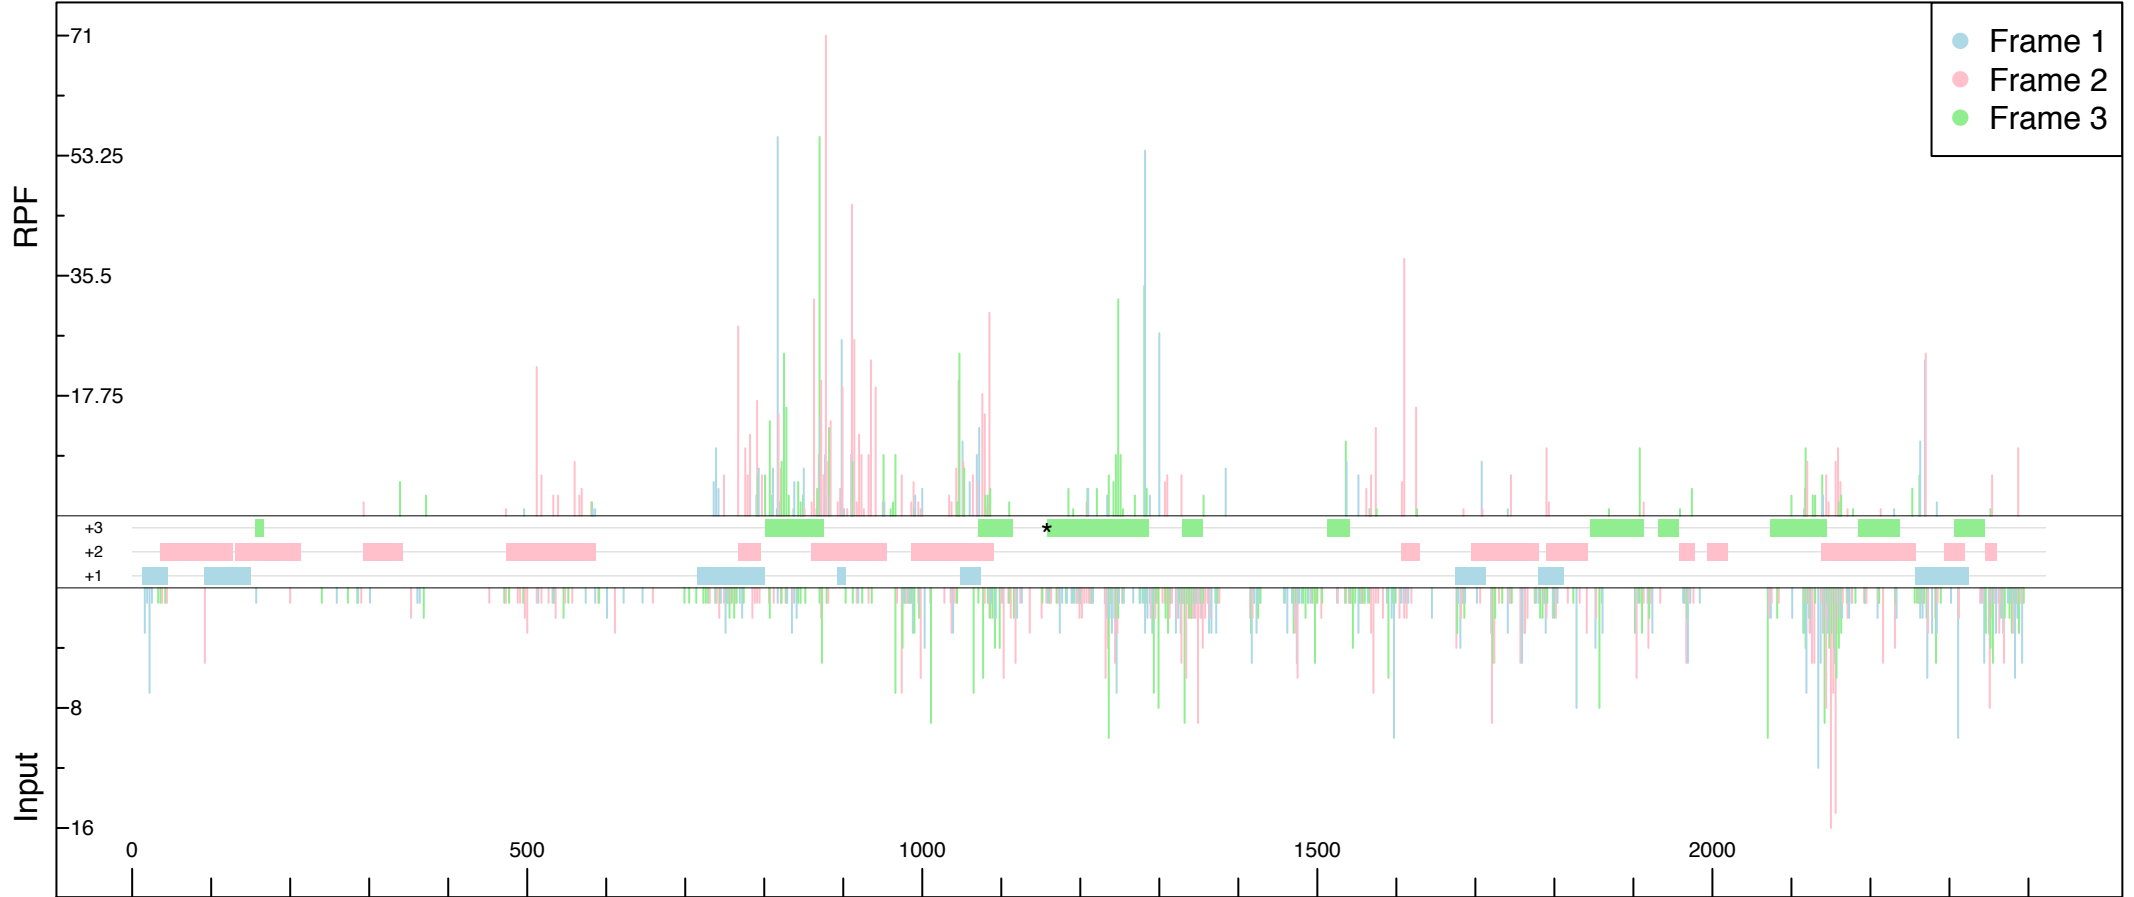

\*MFSSLETTTSFKPLLTCCAIYYCKVHYLPKWTFAIKHSTSLV

# ENSDART00000146393, Global

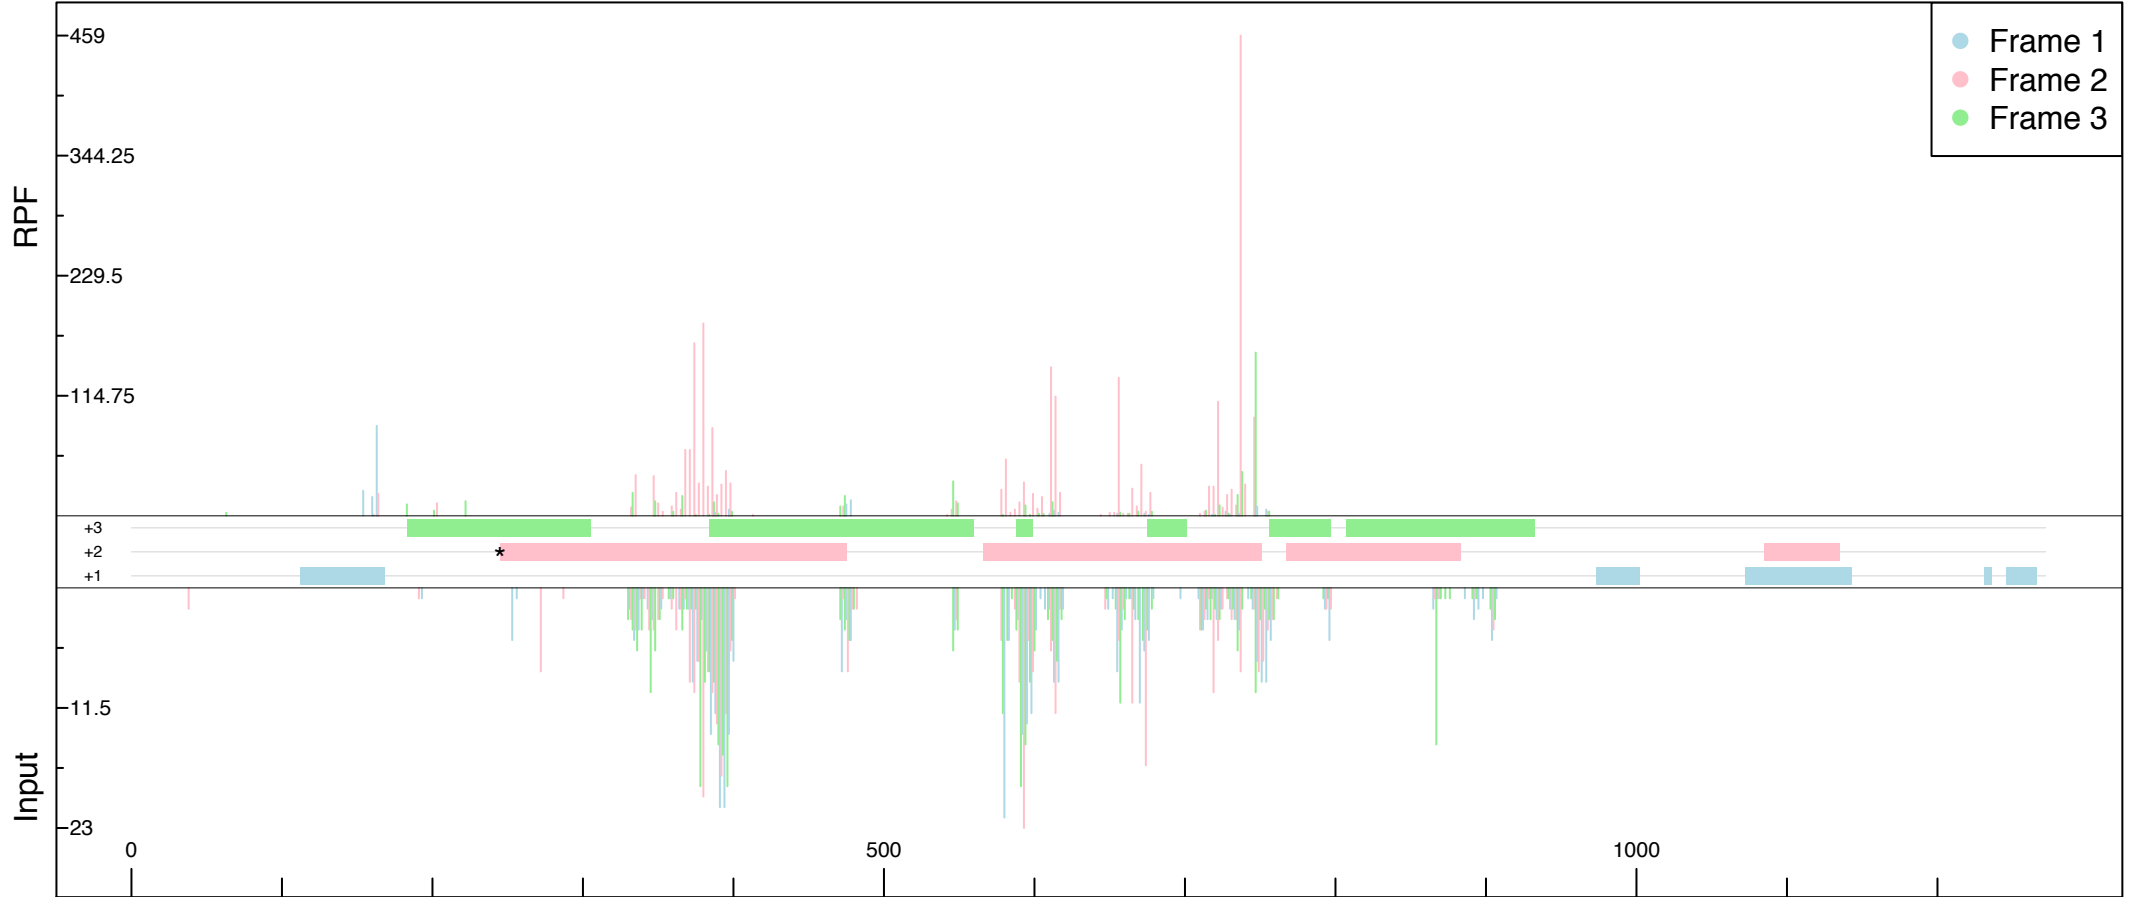

\*MRLIPGSHHSLHLCQHPDLLTSSLKKKSSTGKSTKSDKSDQSPSEDTTDDSDTYCKDKDAKKQREKLQQTCPEN

ENSDART00000146356, Global

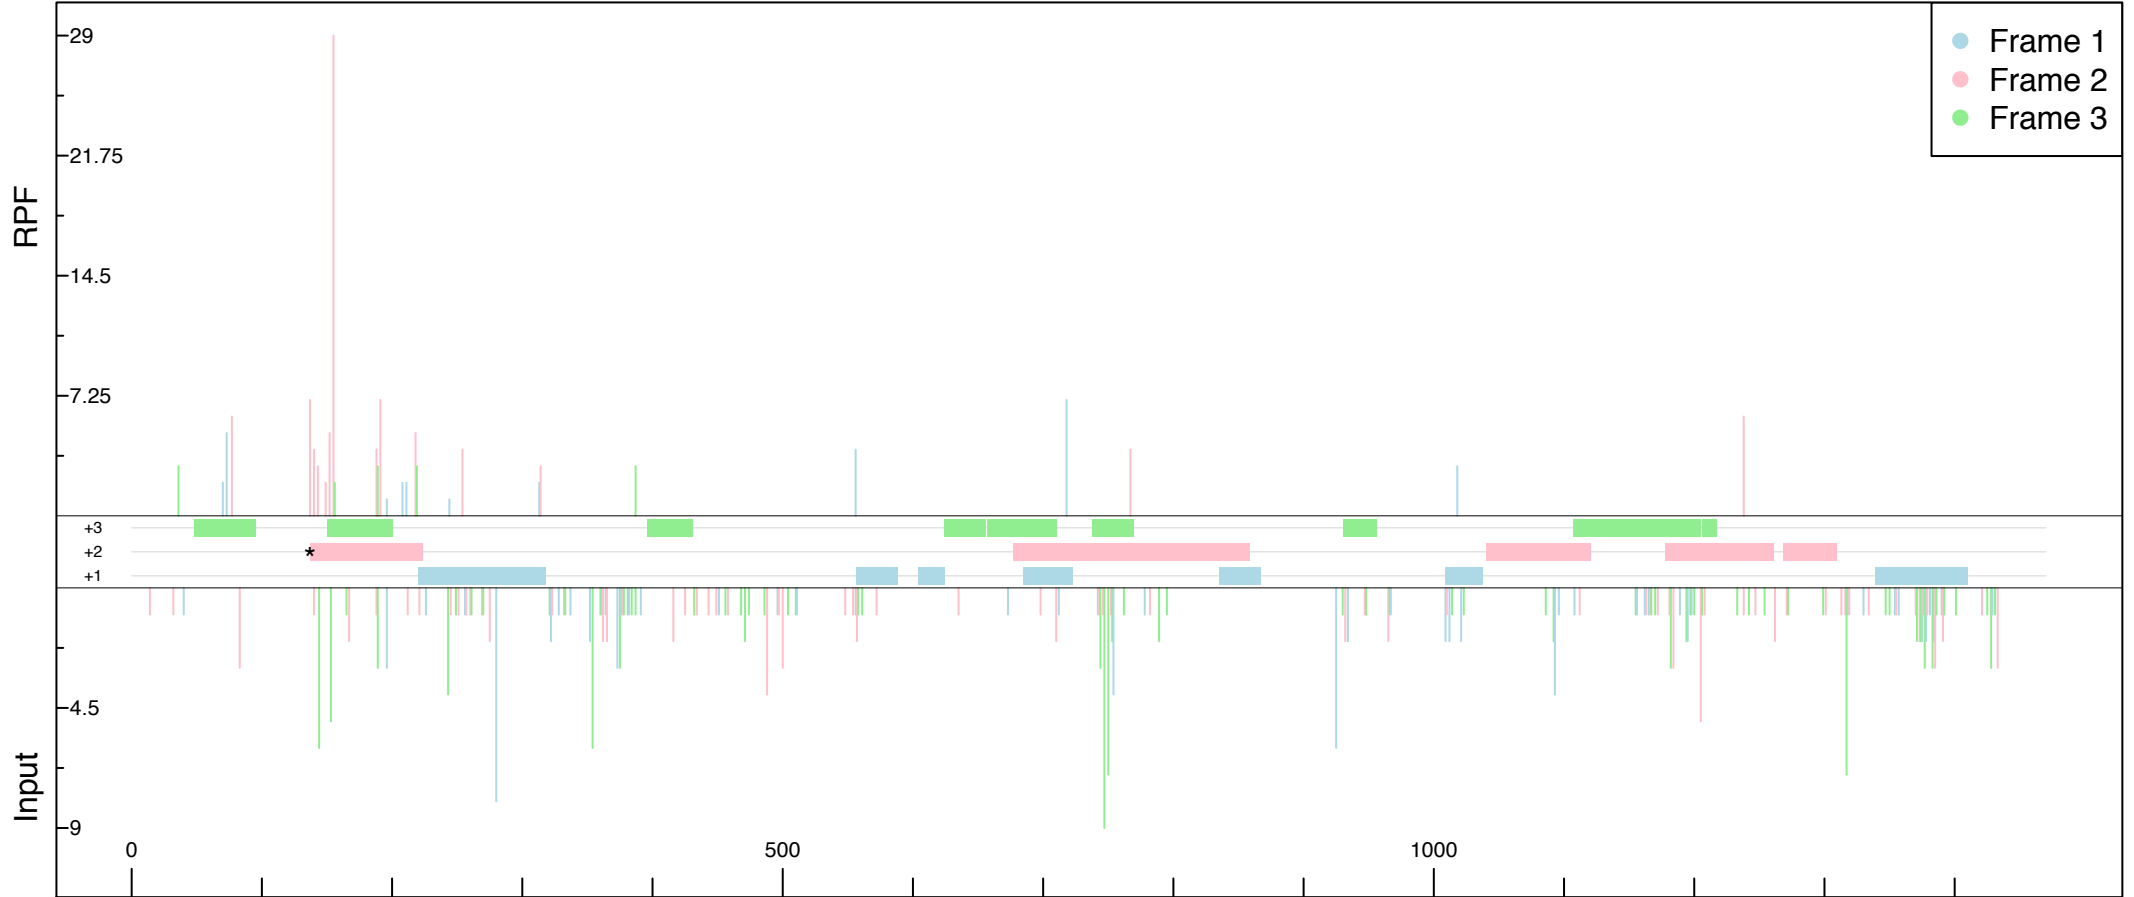

\*MATIDENDGELAFSEHFLCILMKIMKTS

# ENSDART00000141962, Global

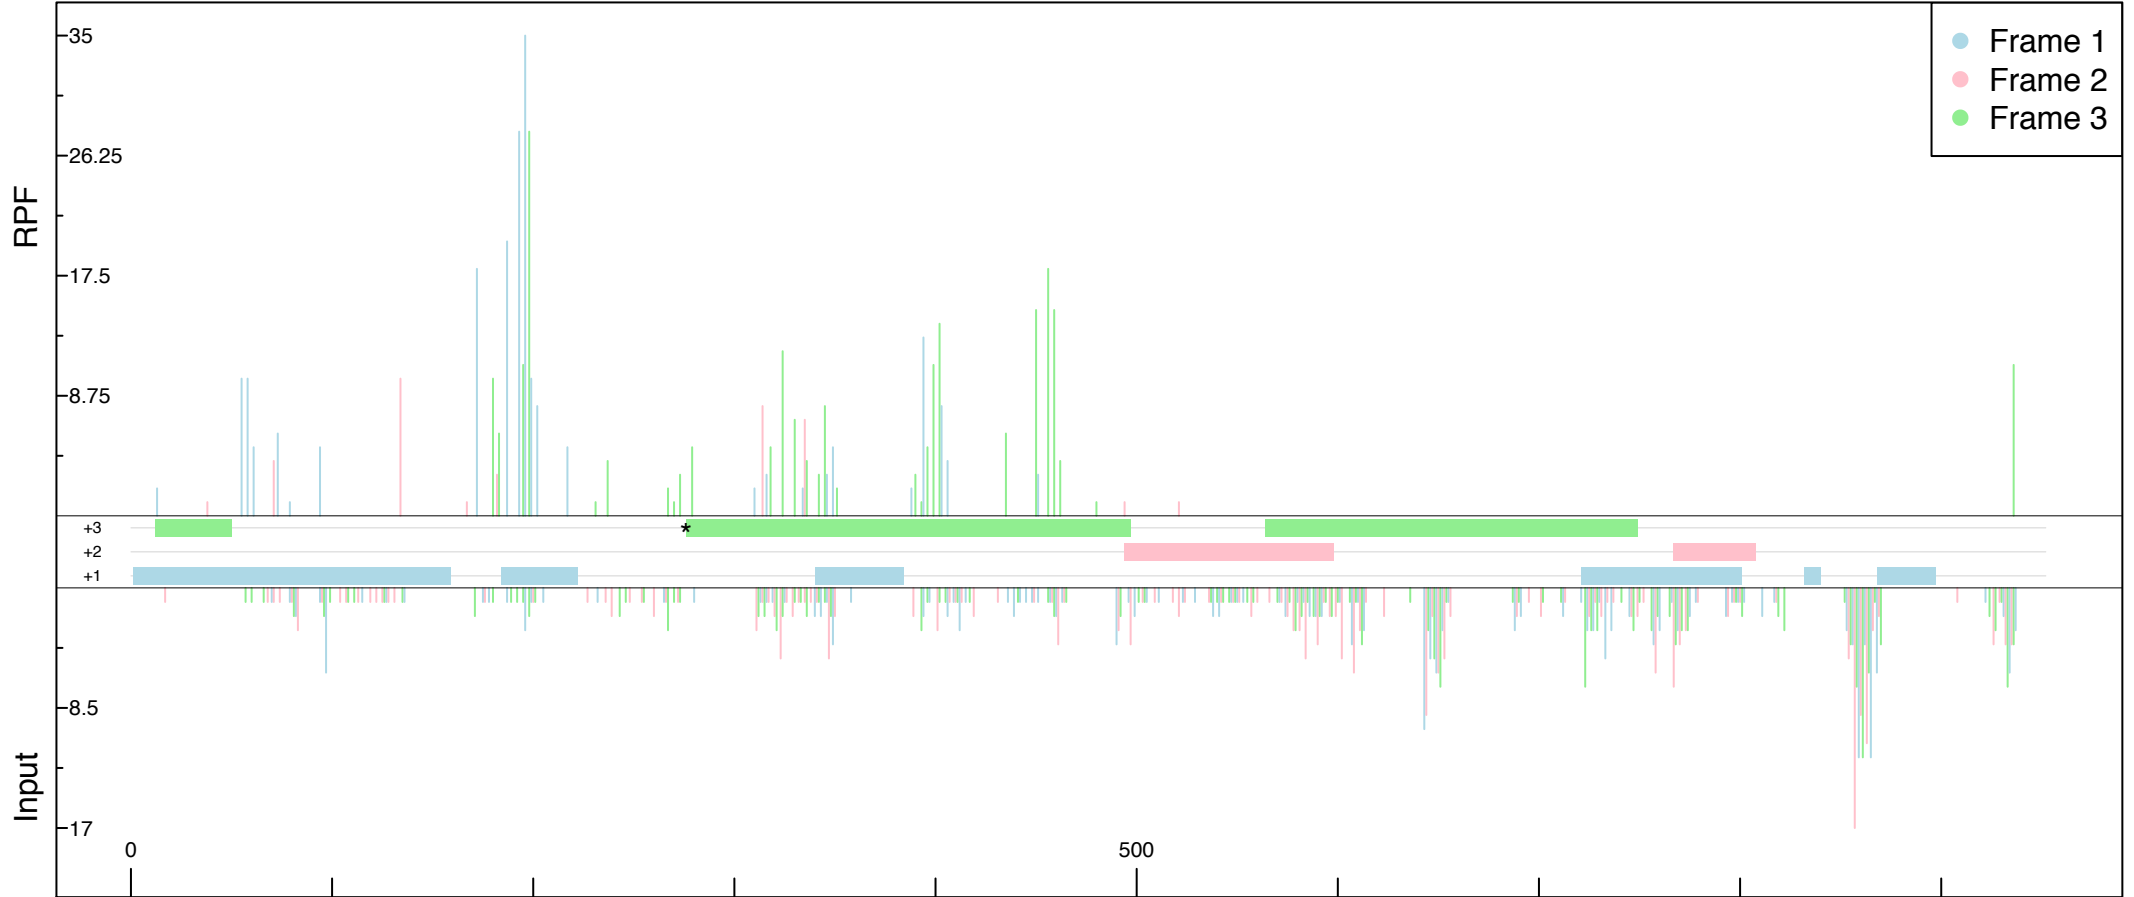

\*MSSVSWDTAPVINGAPPTKHQNGLSSNGDAADFKEIIKLSNHSGNSGQSQPADDPIMAFEGGEPFMMKRCCER

ENSDART00000143081, Global

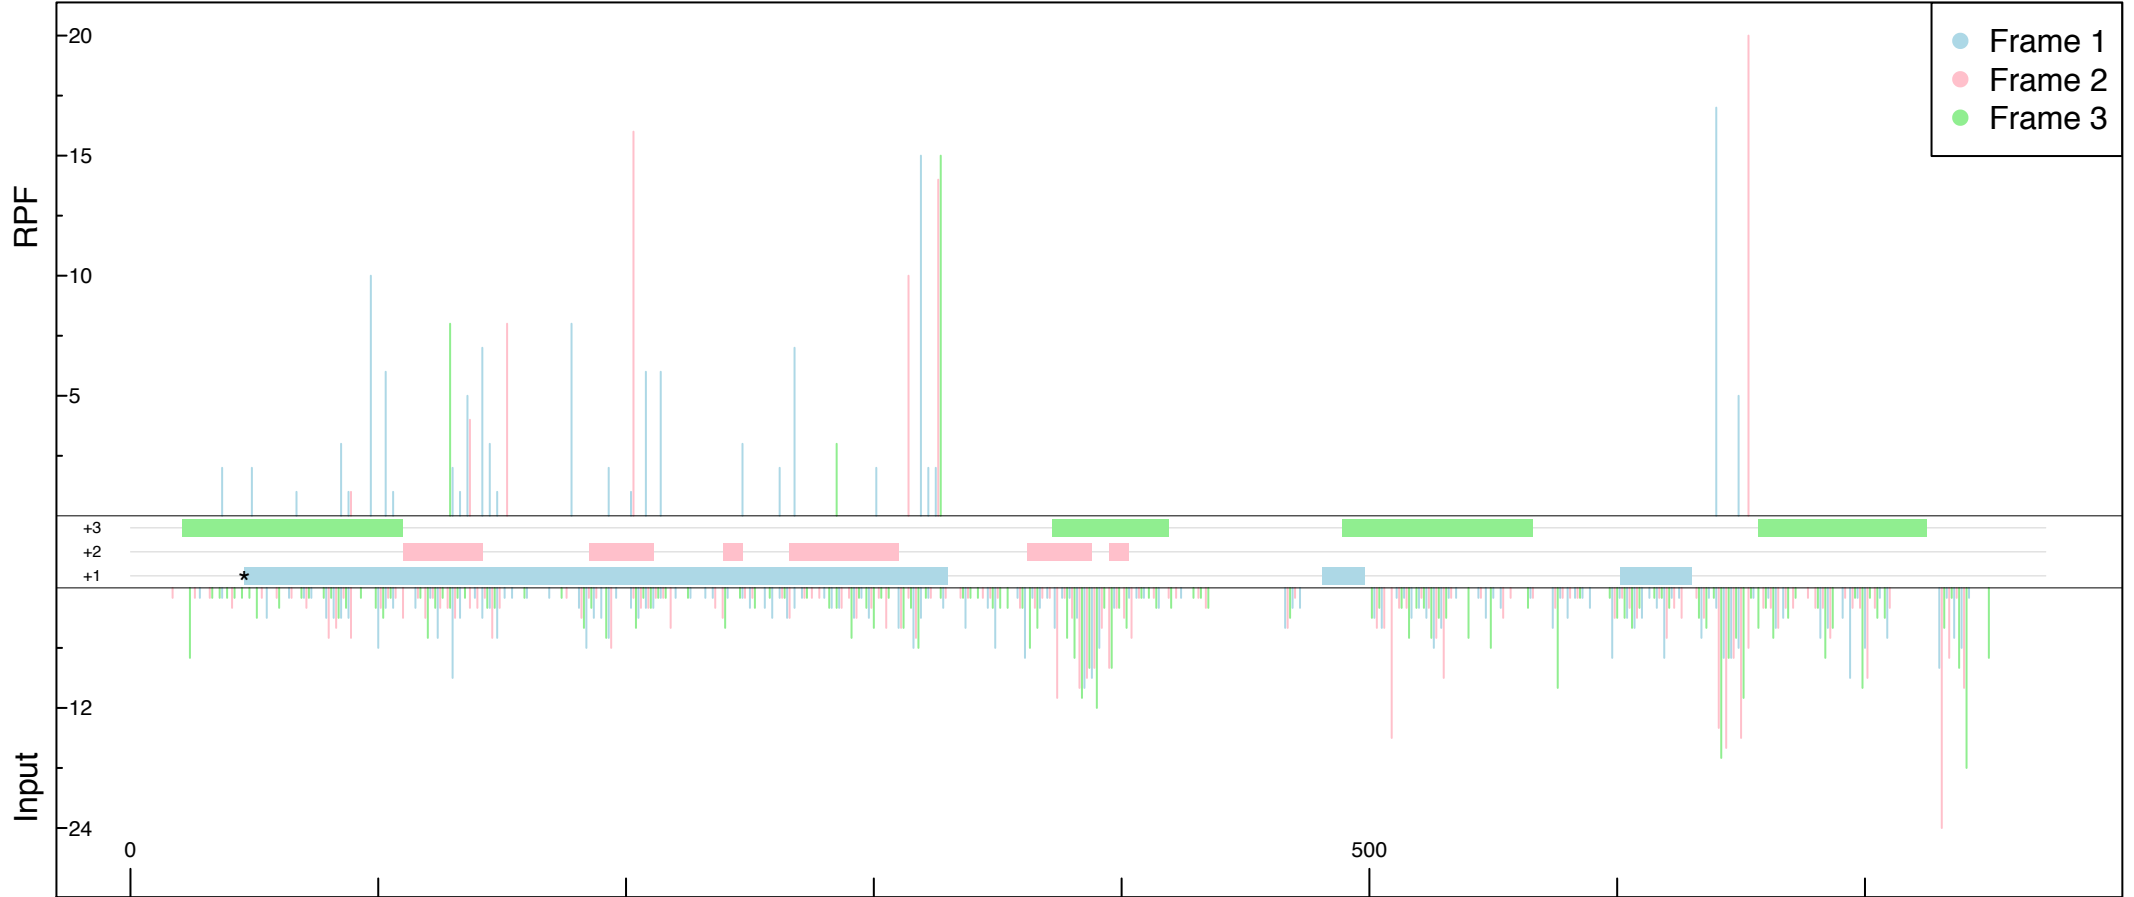

\*MMLTLTPSIIIEELRMRDPSFPDVS HGVLIHRVIVGSPANRAGMKPGDVII EINGVKVNTSEEIYNAVRTSESLNVV VRRGADLLMLHMTPESTE

ENSDART00000136132, Global

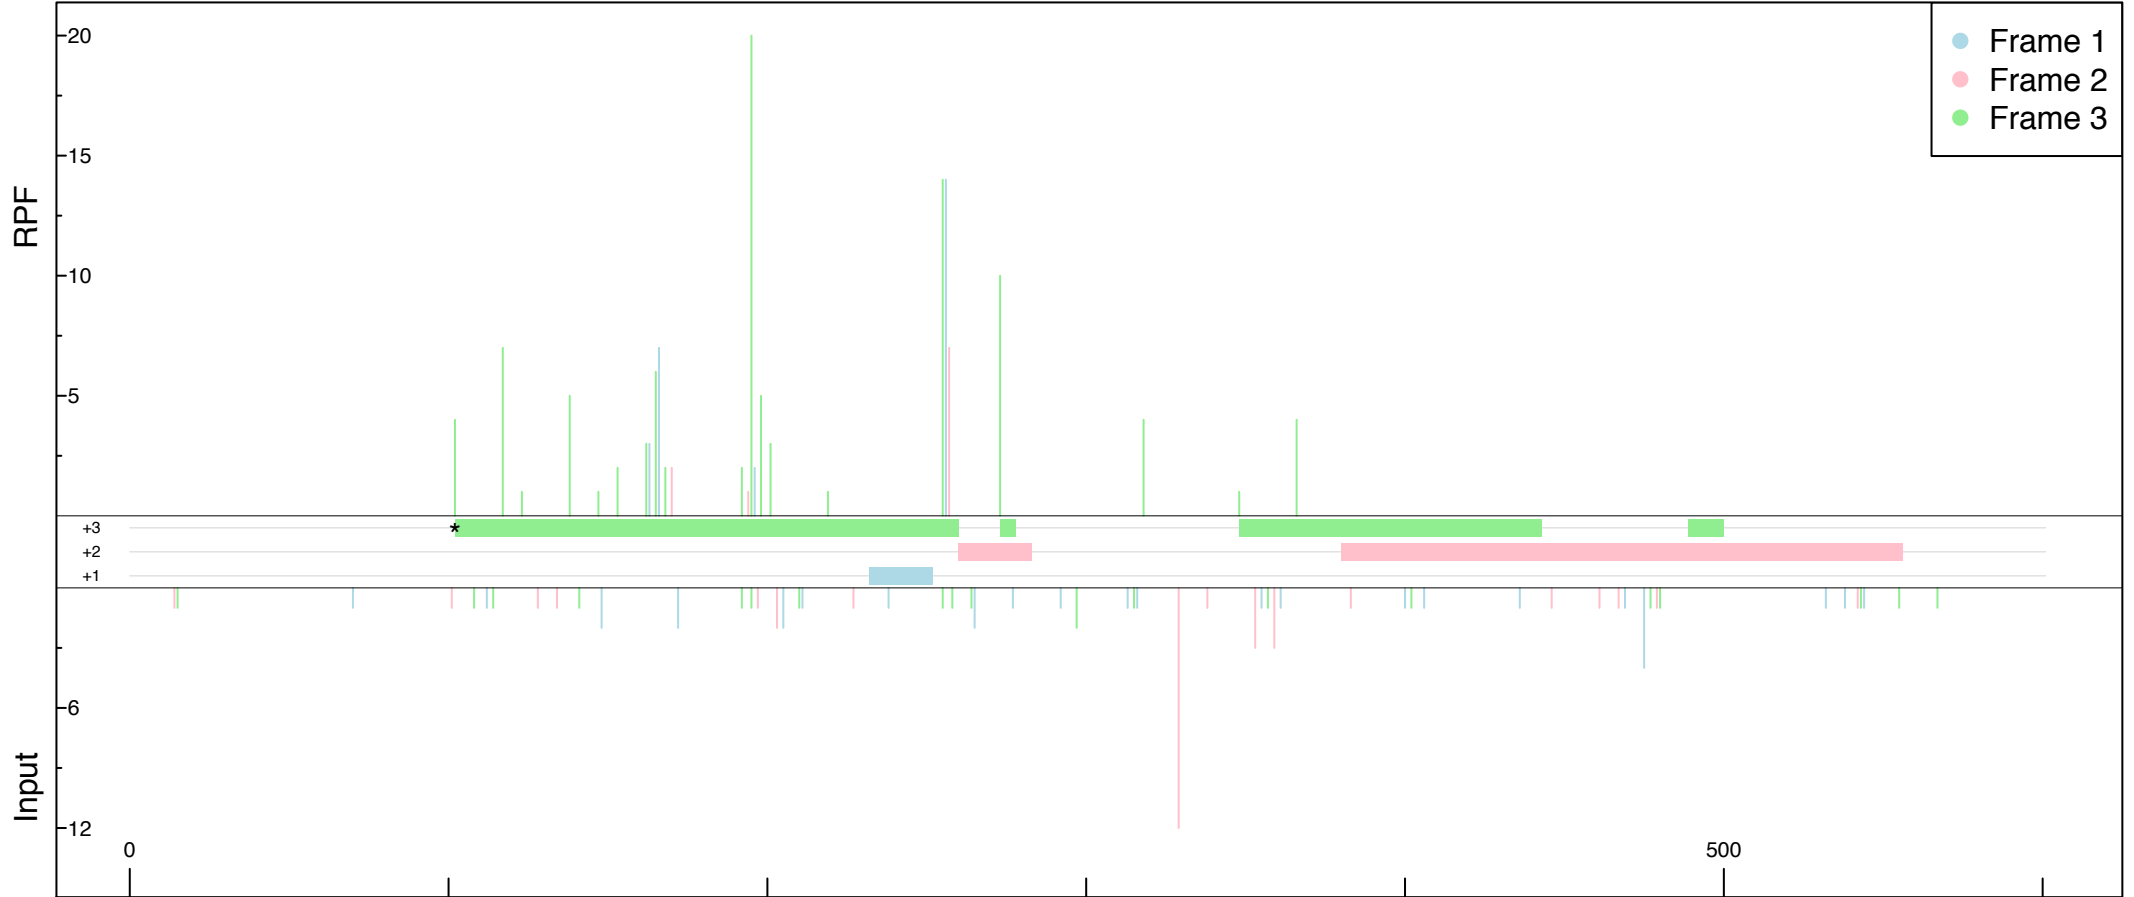

\*MDESLVMIFHSFRDILQSVRDPCRYHMMIWLNLKIELCLVSIINNDKRSLLTG

ENSDART00000142372, Global

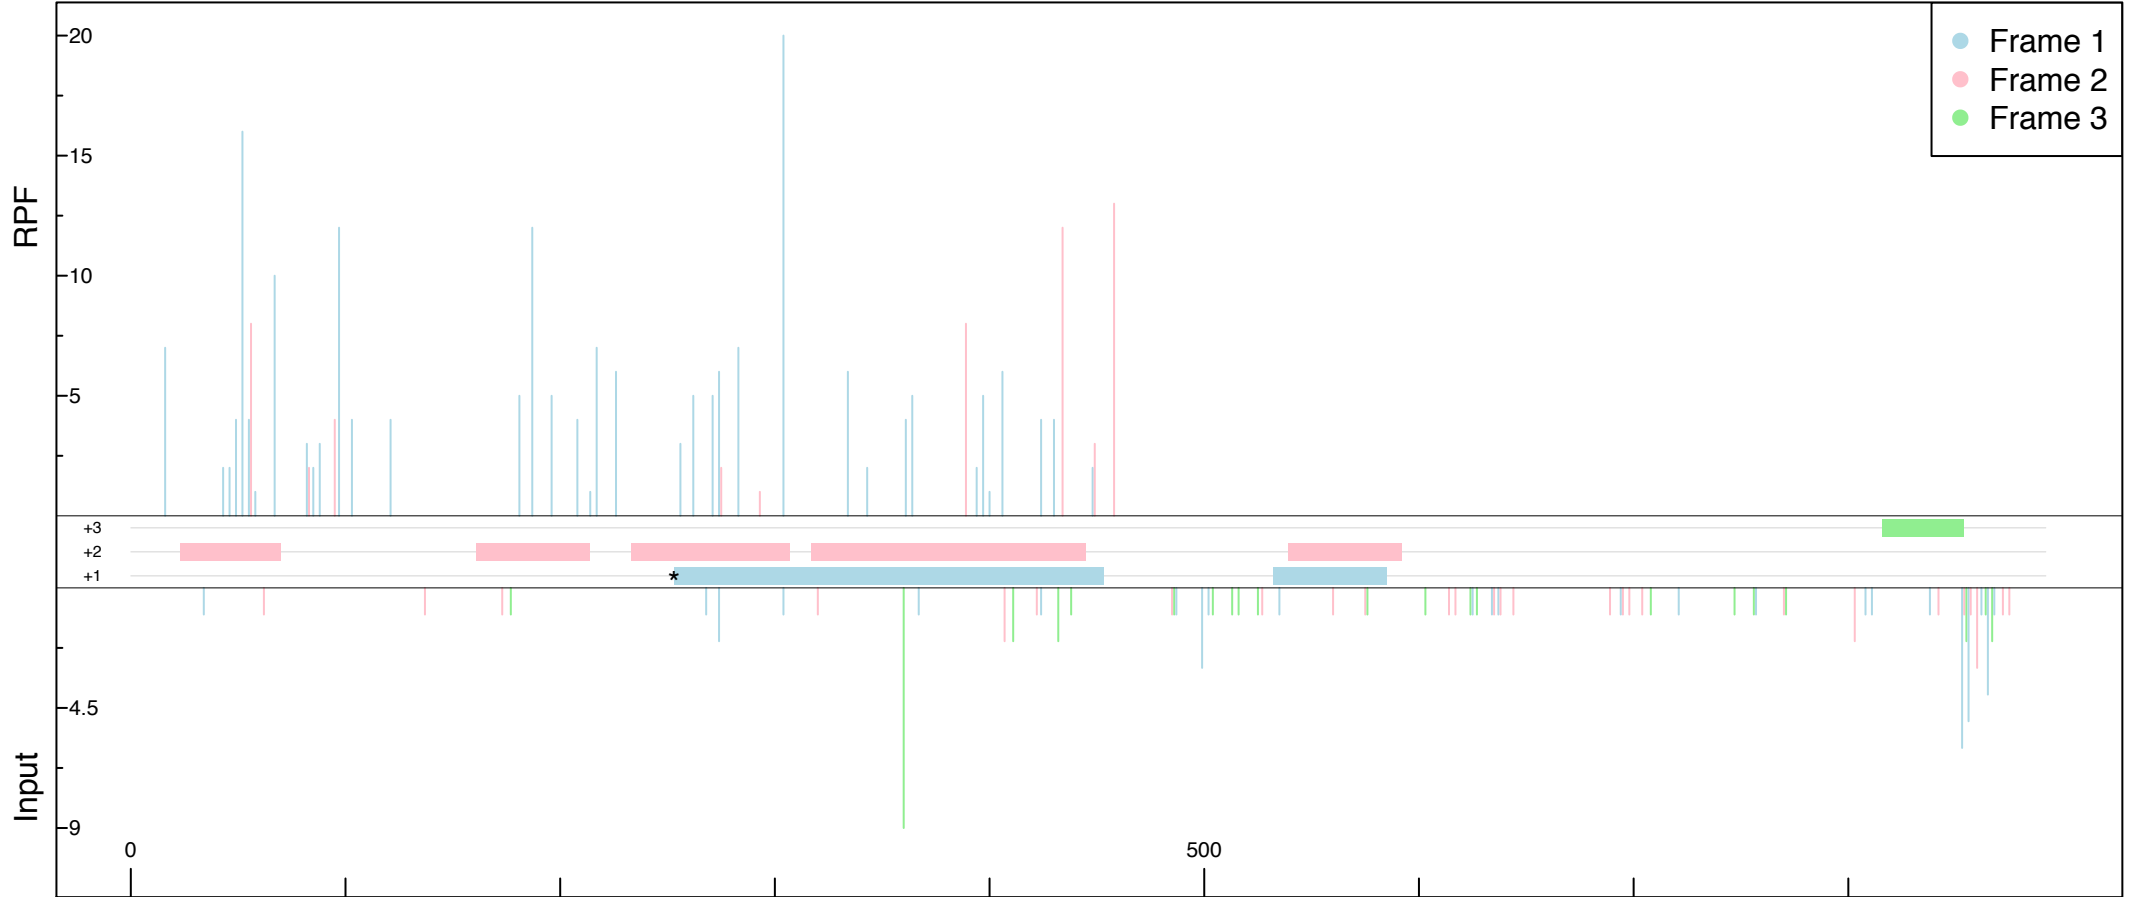

\*MCRETSAGFQNLNYIALNLM DGLASCDLVRFKAA SCCKE GINGIHTSPYASLGFKDTATTVKD

ENSDART00000131930, Global

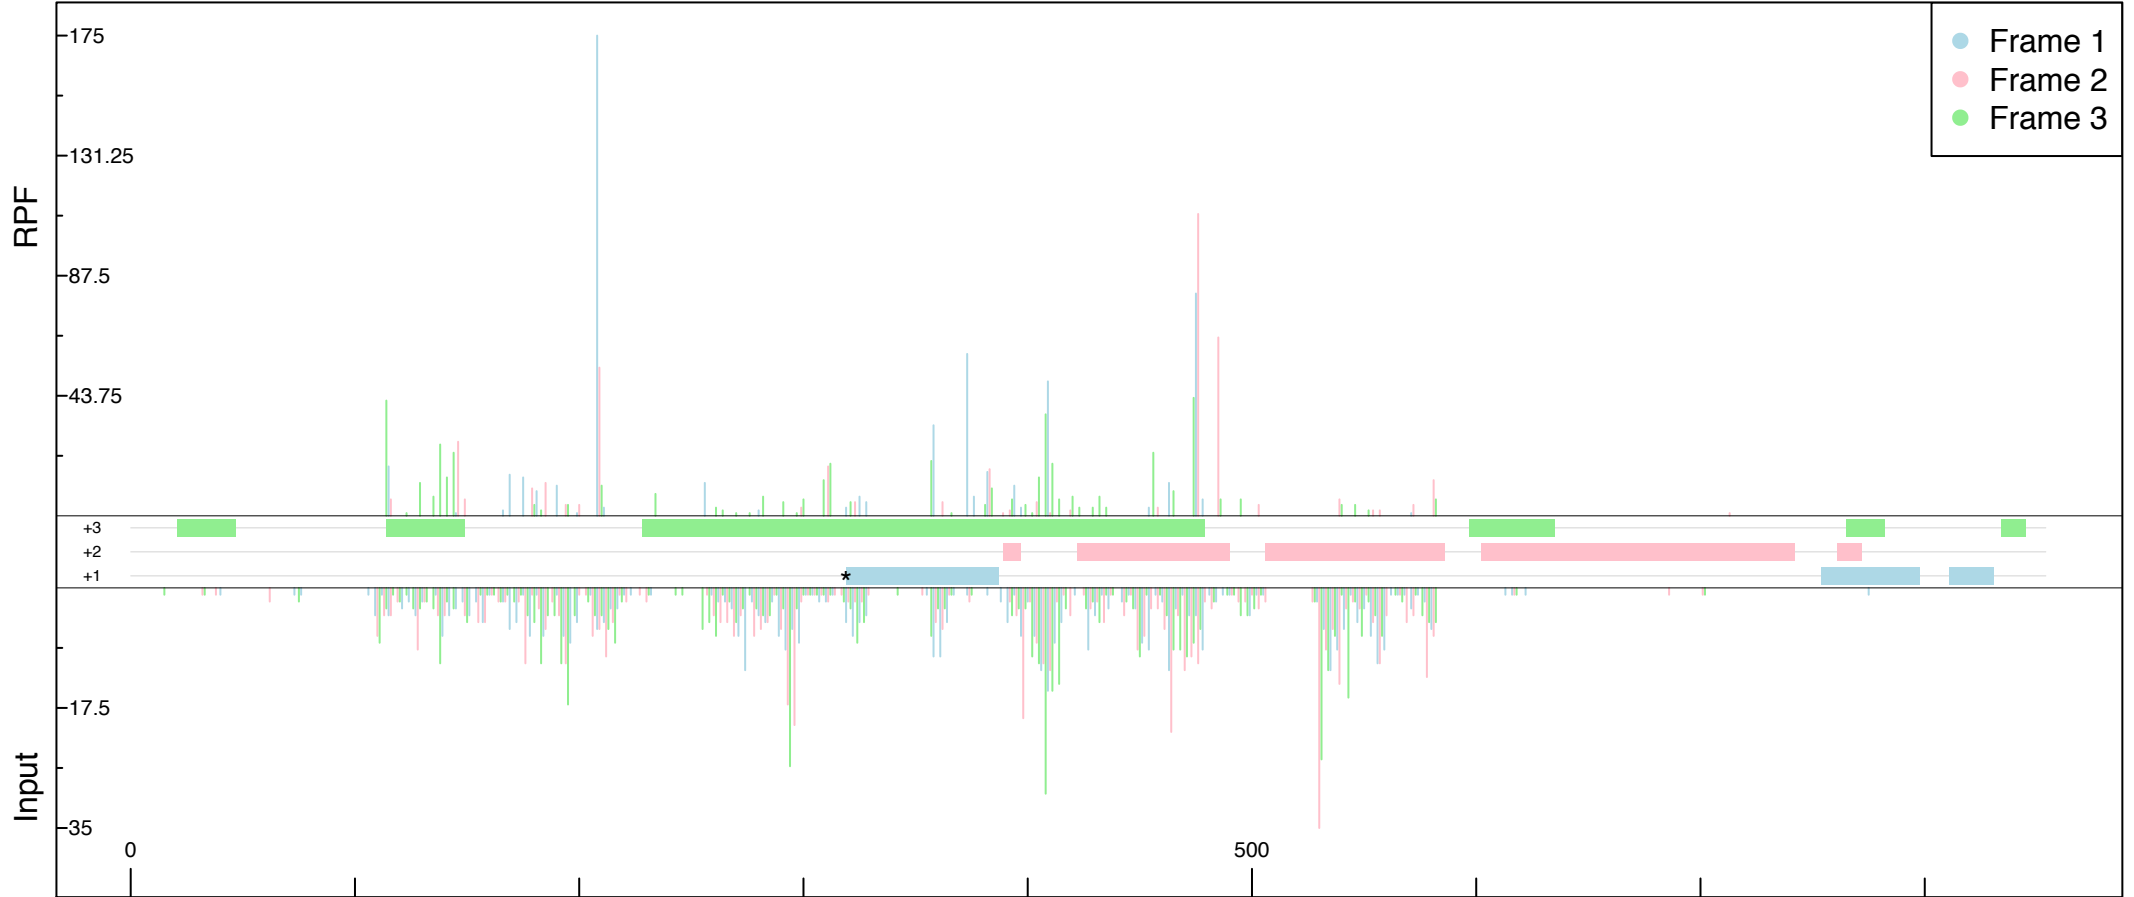

\*MMAPVWTYQCPRLQVSIKTVYI



ENSDART00000136012, Global

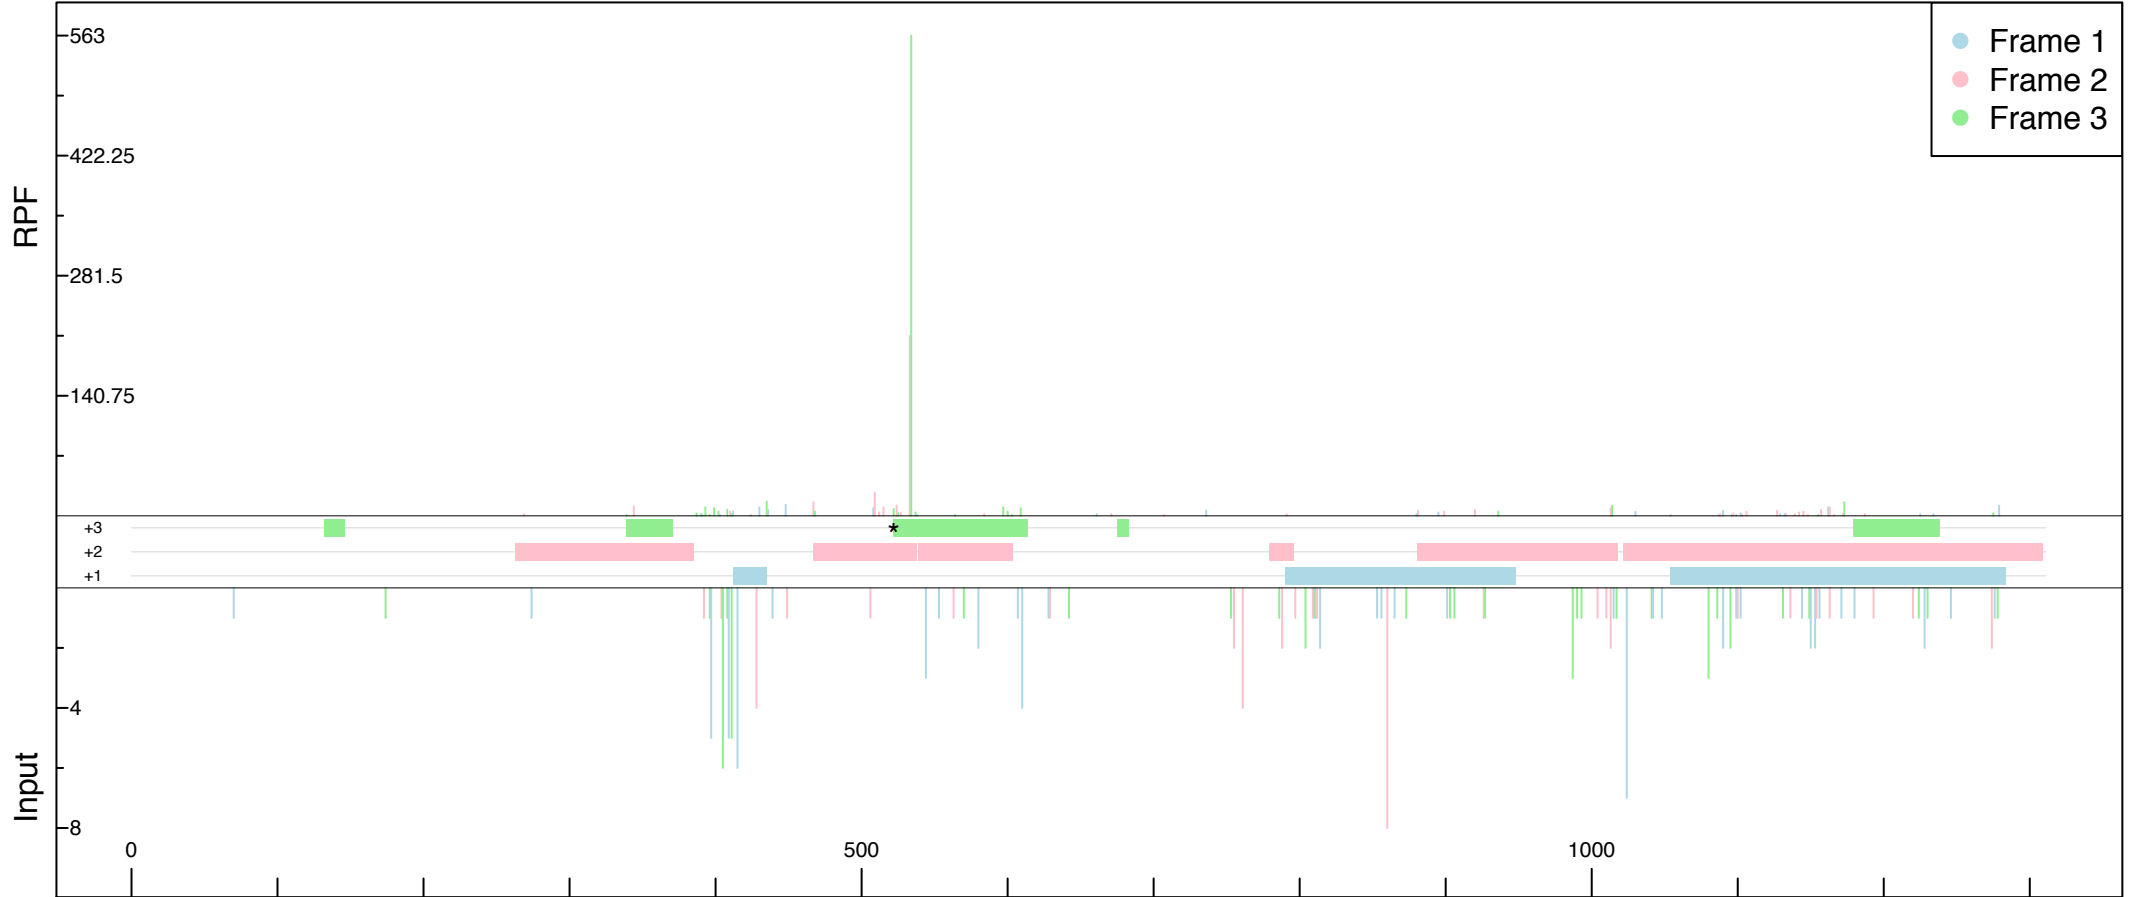

\*MVNLTECIHQPSPTKSELQGQLVLKVPELD

ENSDART00000137130, Global

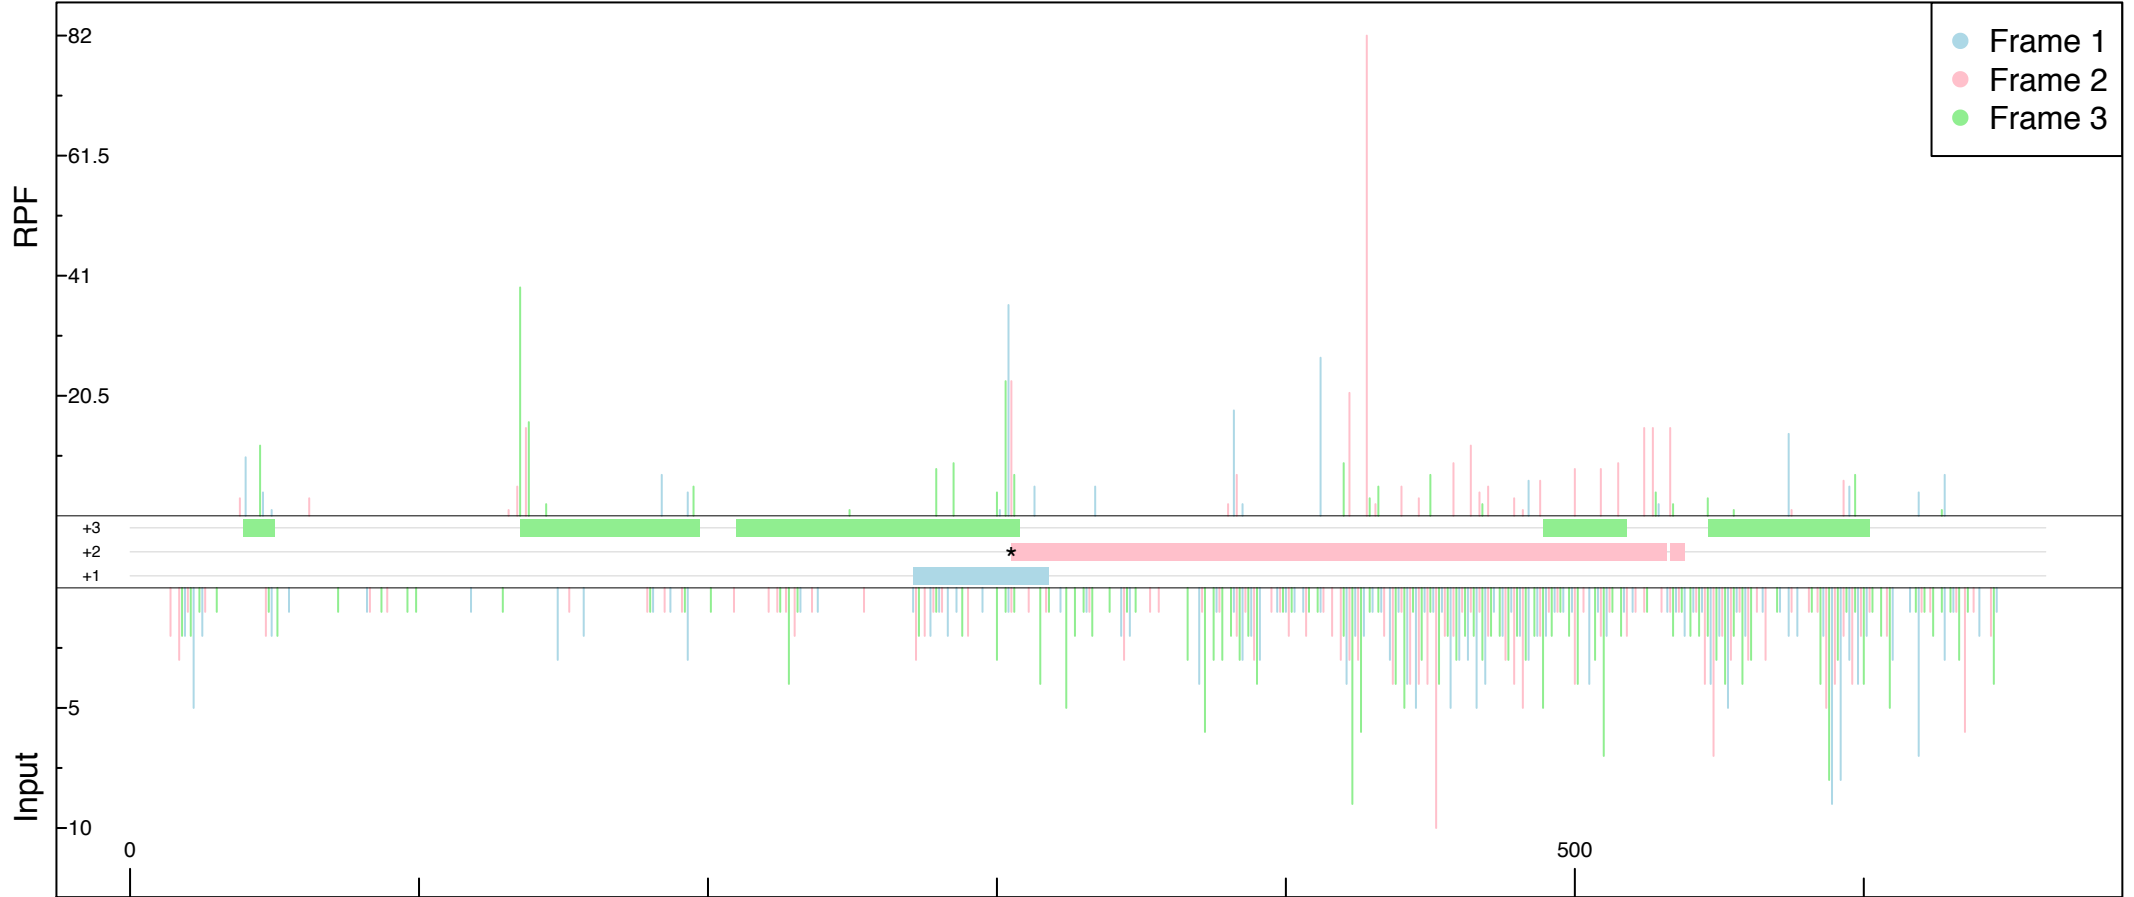

\*MTQTEQHLYIWATQKLHRQTLHTLQDKLRGGKENQHCSQLKMWTTNMLRRRHRLRLKMVRDTEKTHNTKEVAETY

# ENSDART00000137620, Global

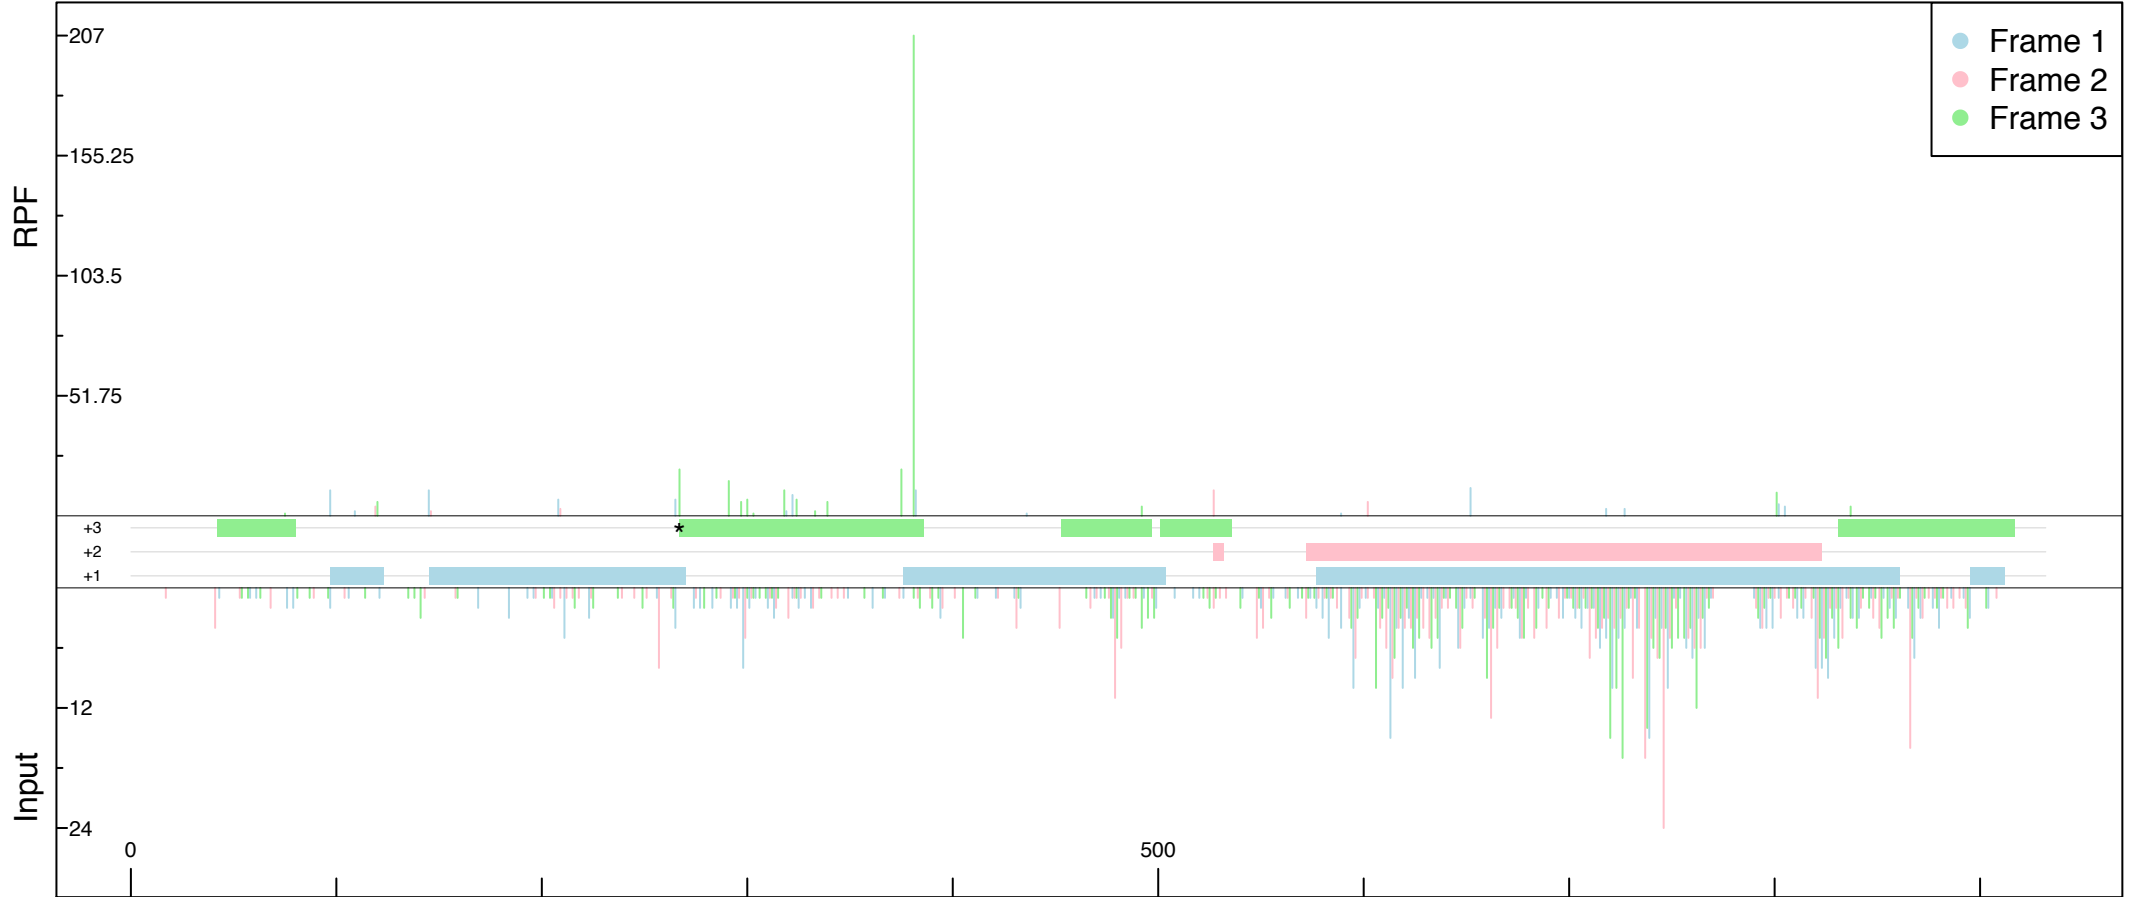

\*MTSTGAMGDPIRVDSVCPEPAGAQRNVHQTSTFPLSDAG

# linc-glr3, Global

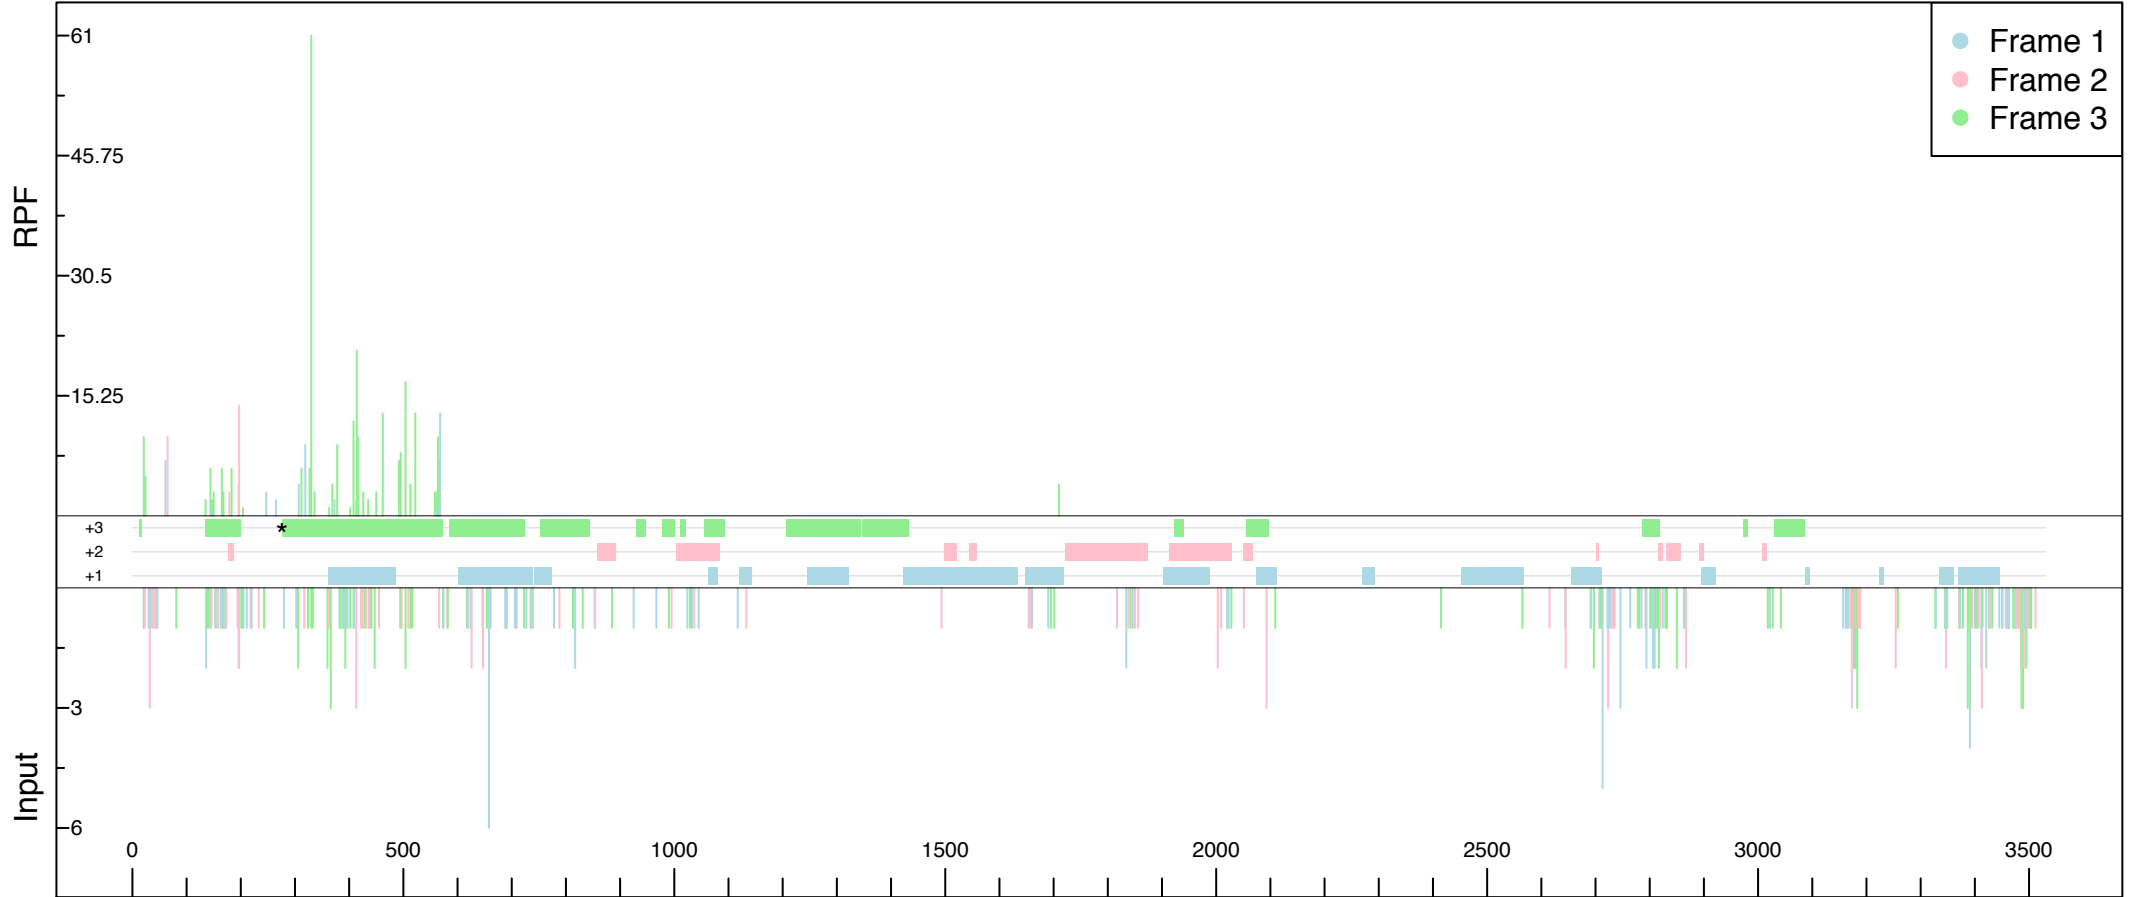

\*MDCISPMQNKRRHSGELEQWHNQPKRQCNGLGGCGQLEYSVVVDTPMDTDAPNHSSQNGHSANVPVMVLNAPGRAAGQHCSRCMAGEPGHINHIMRY

ENSDART00000145526, Global

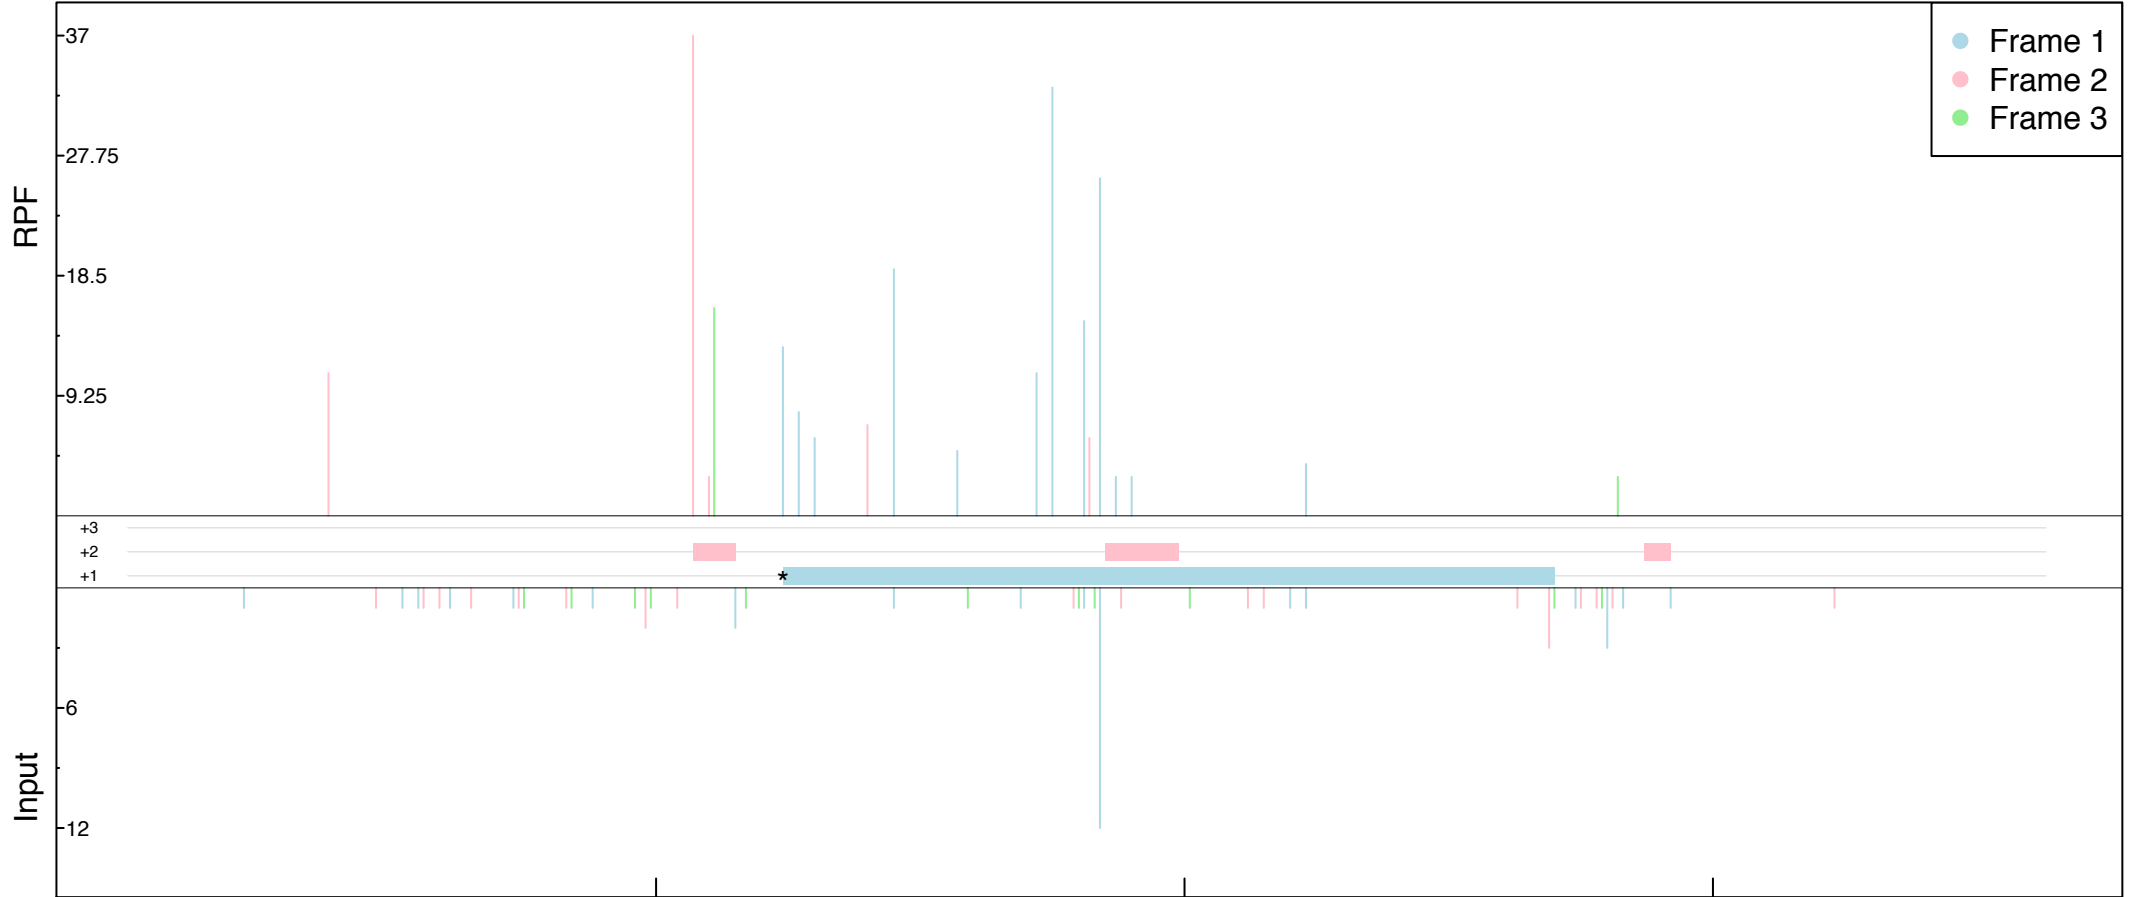

\*MPTNFTVVPVEDTPLSDLDCDGDGLKEEDKEEPETAAGHYPESKSLPF

ENSDART00000143735, Global

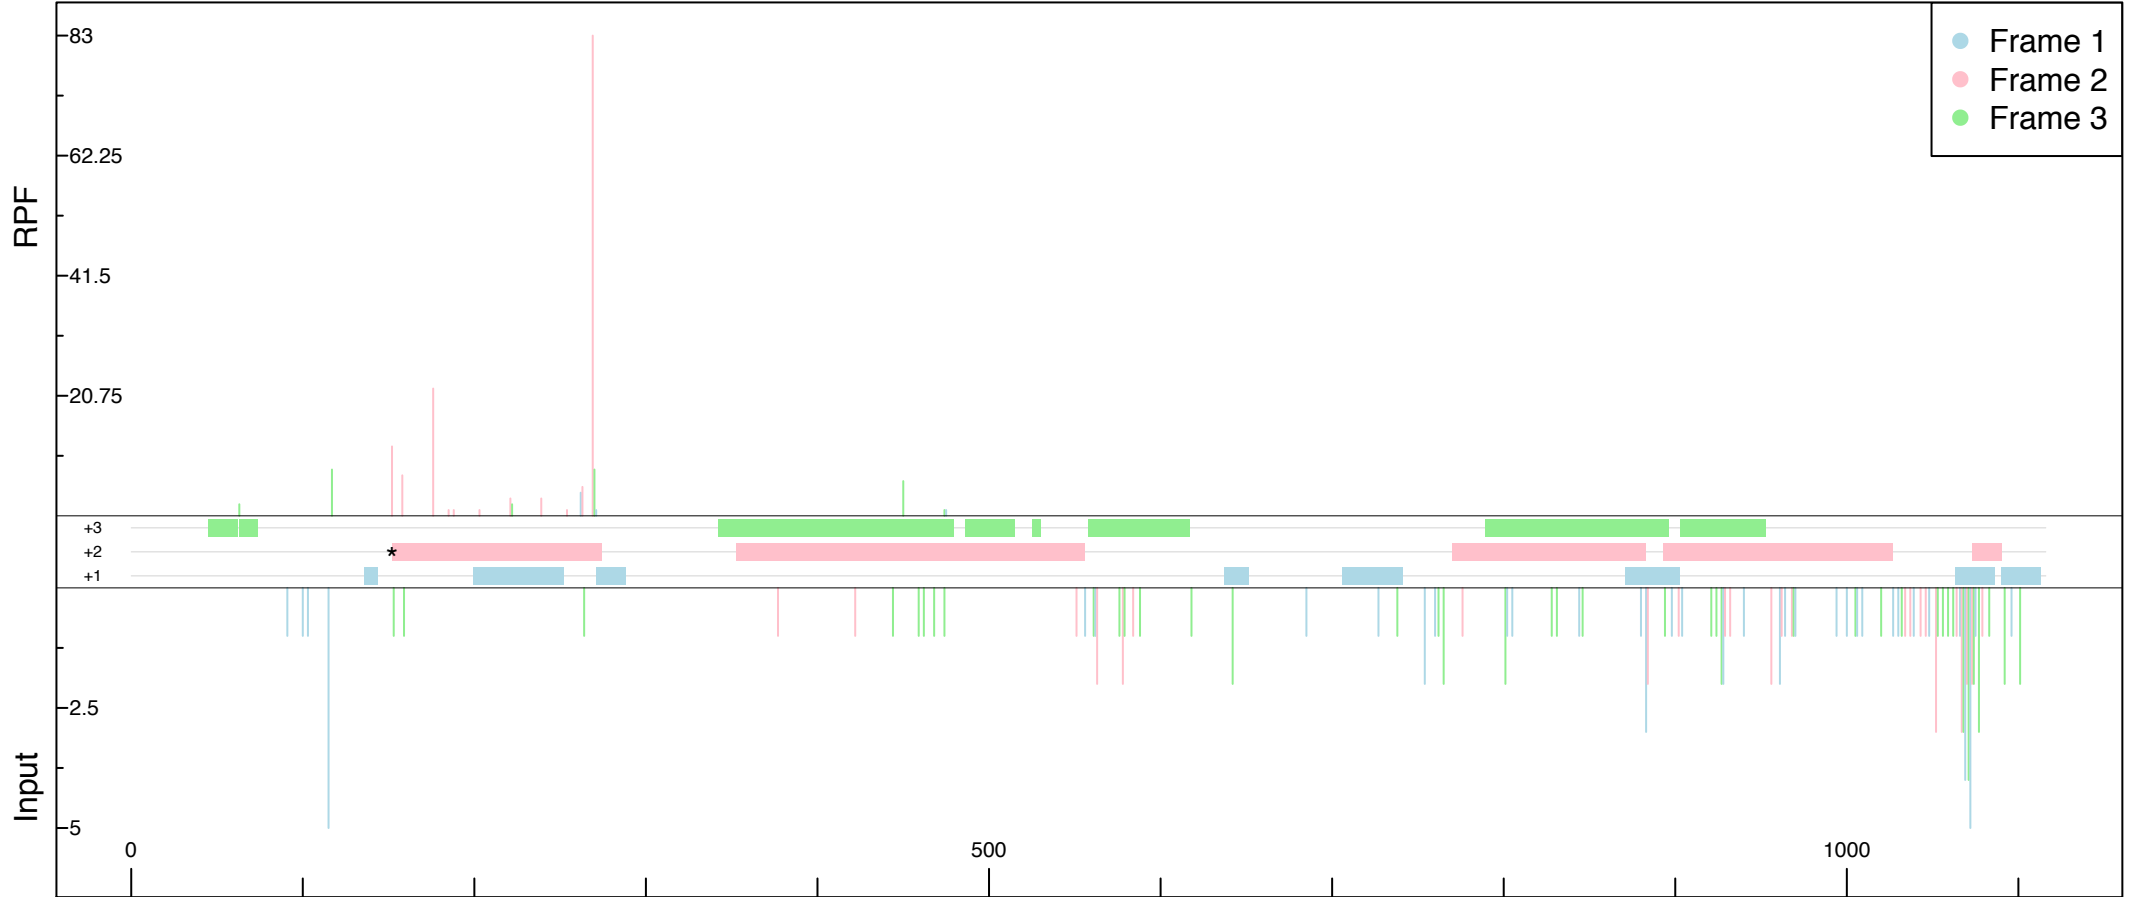

\*MEMVEKRLSRWTGRAGWMQQAPCPRSAQNILCTKTNDCRP

ENSDART00000131620, Global

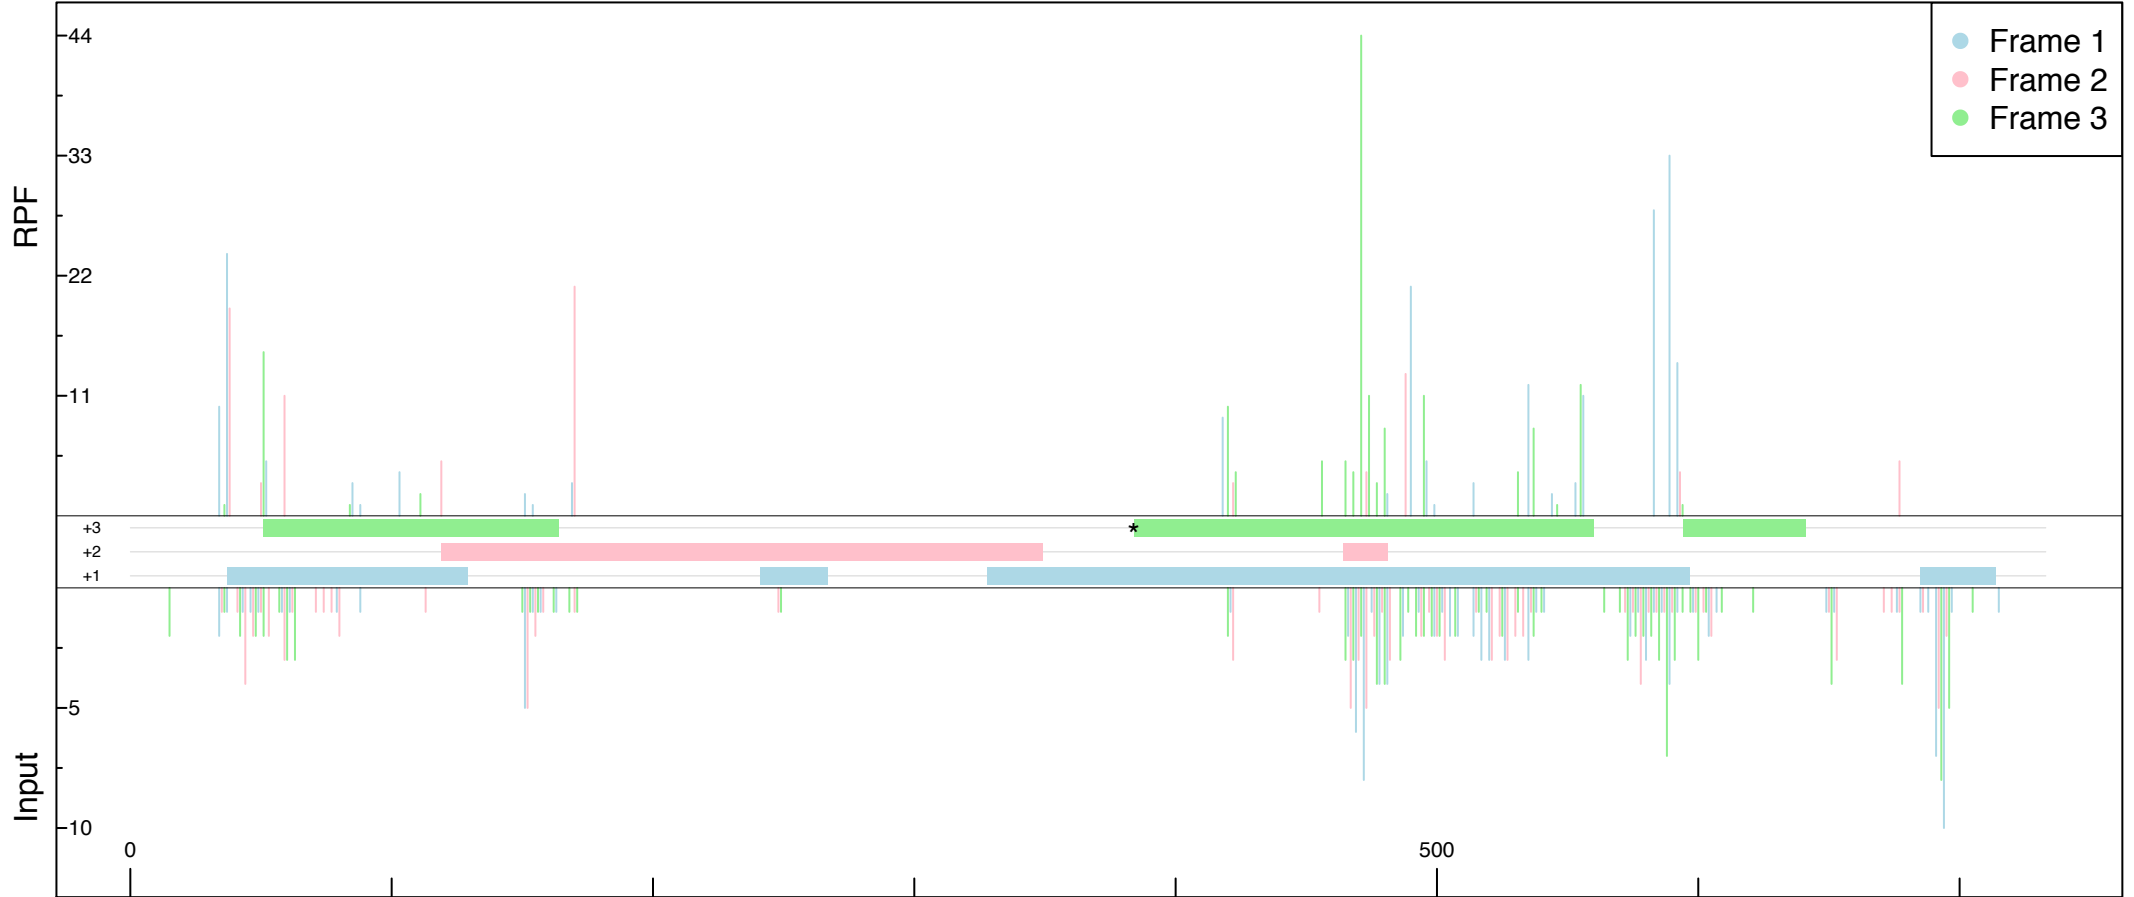

\*MPDCSSTNSVGPADQCLRYLNLGRCVDSYEPNLGRLVFSRWRDLGSRNKTTNHI

ENSDART00000150682, Global

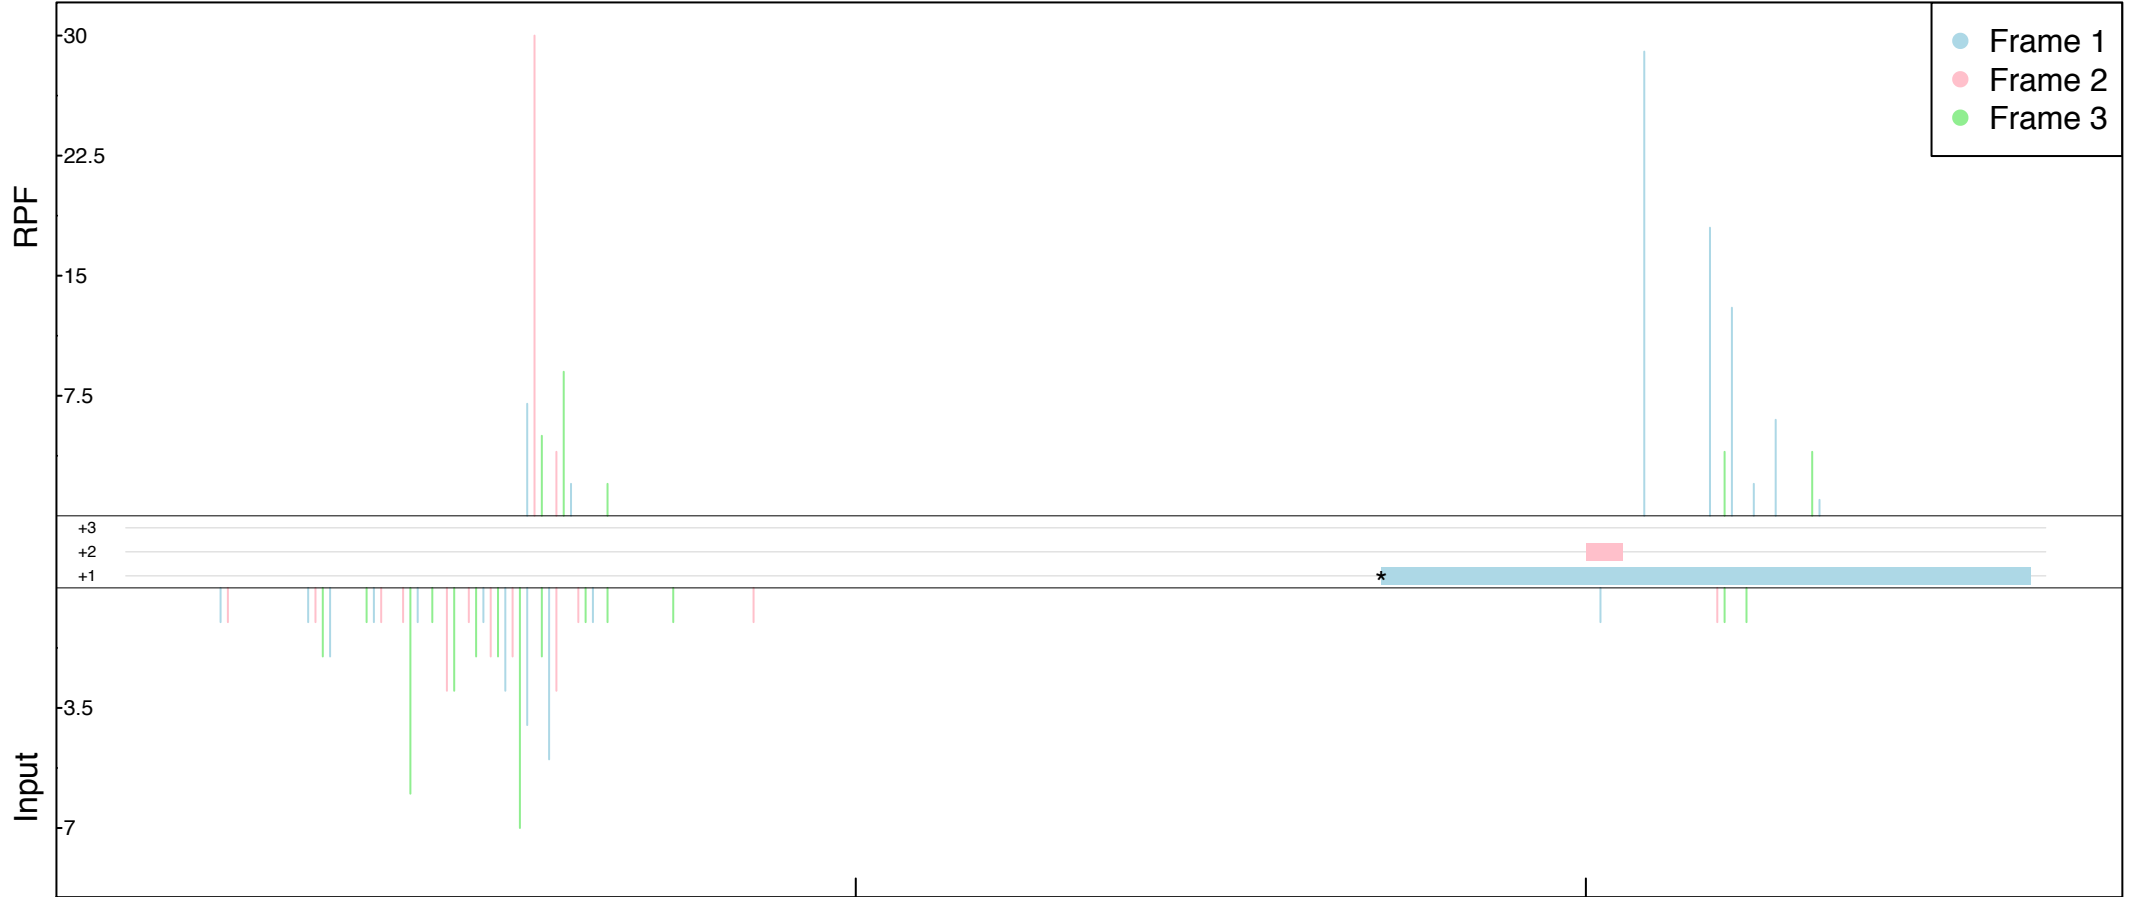

\*MAFIKEESEDVKIEETFSVKQEDLQEQTG



# ENSDART00000152356, Global

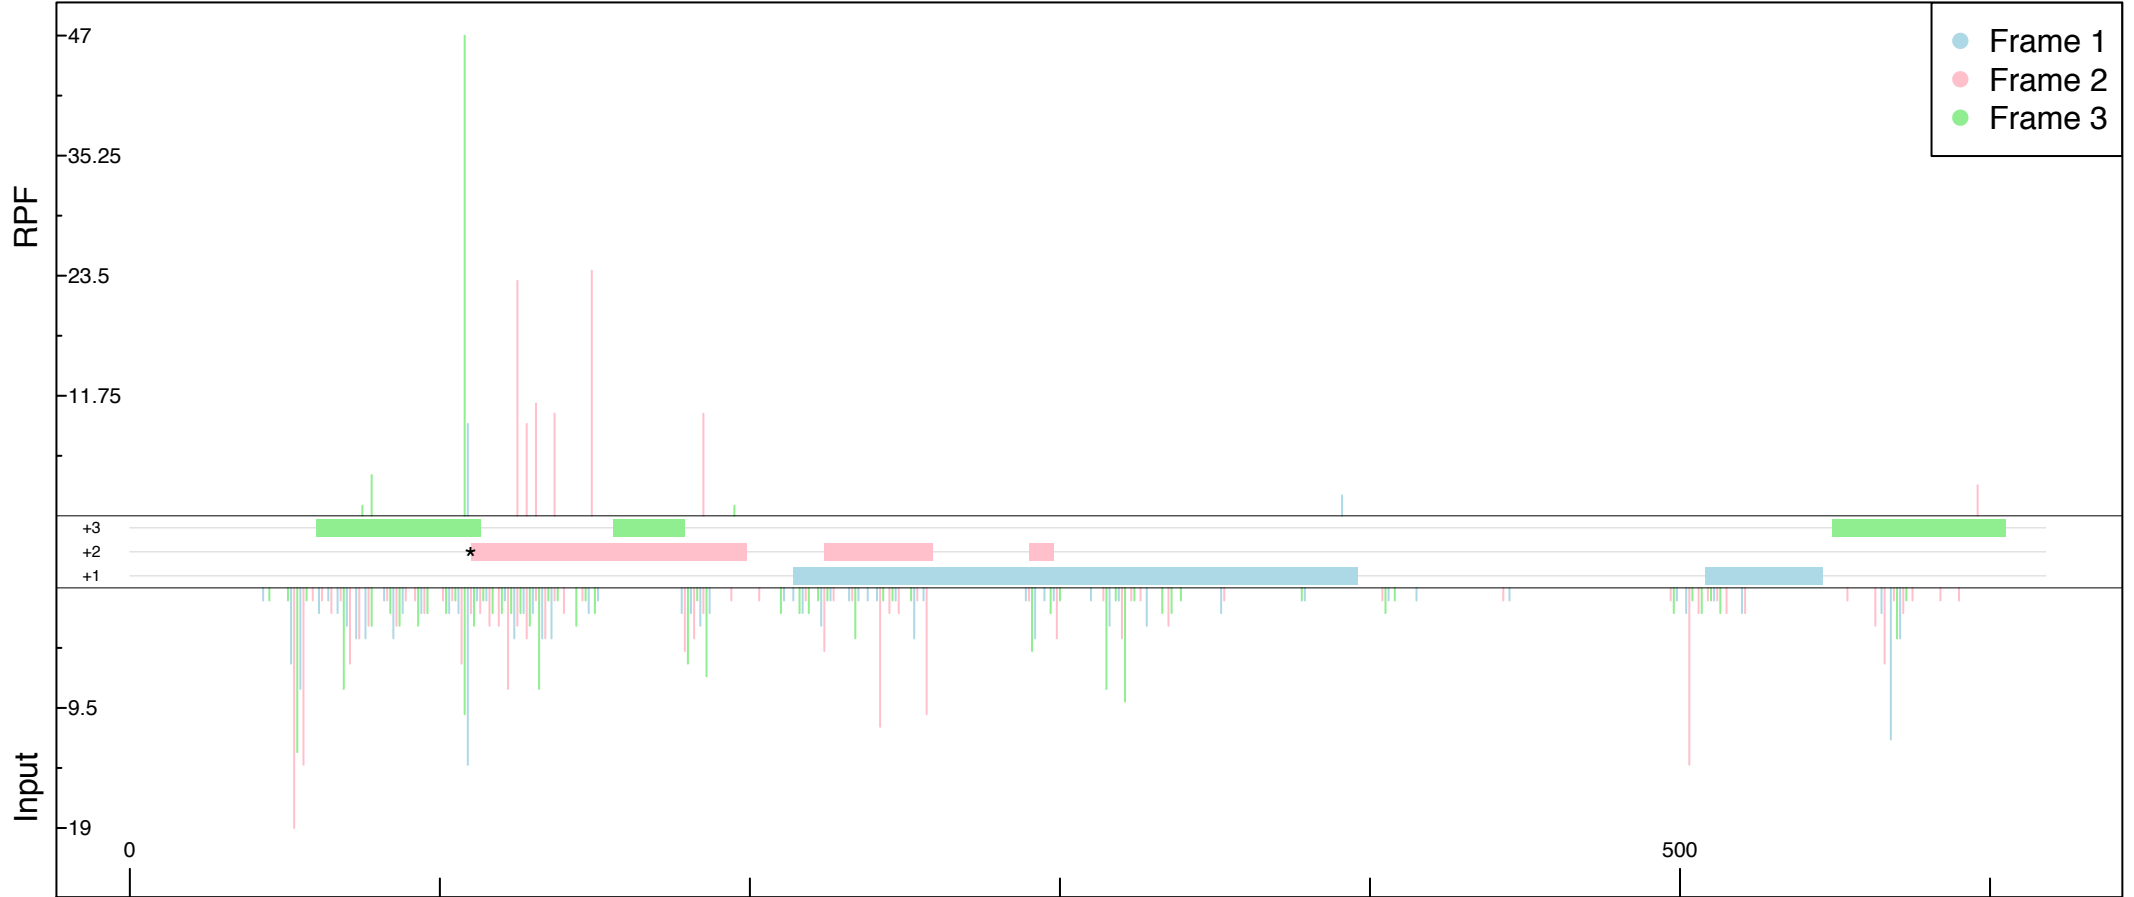

\*MKTEEHQKMEMQRPSDANRCEDVIYSSVK

# linc-q566t3\_danre, Global

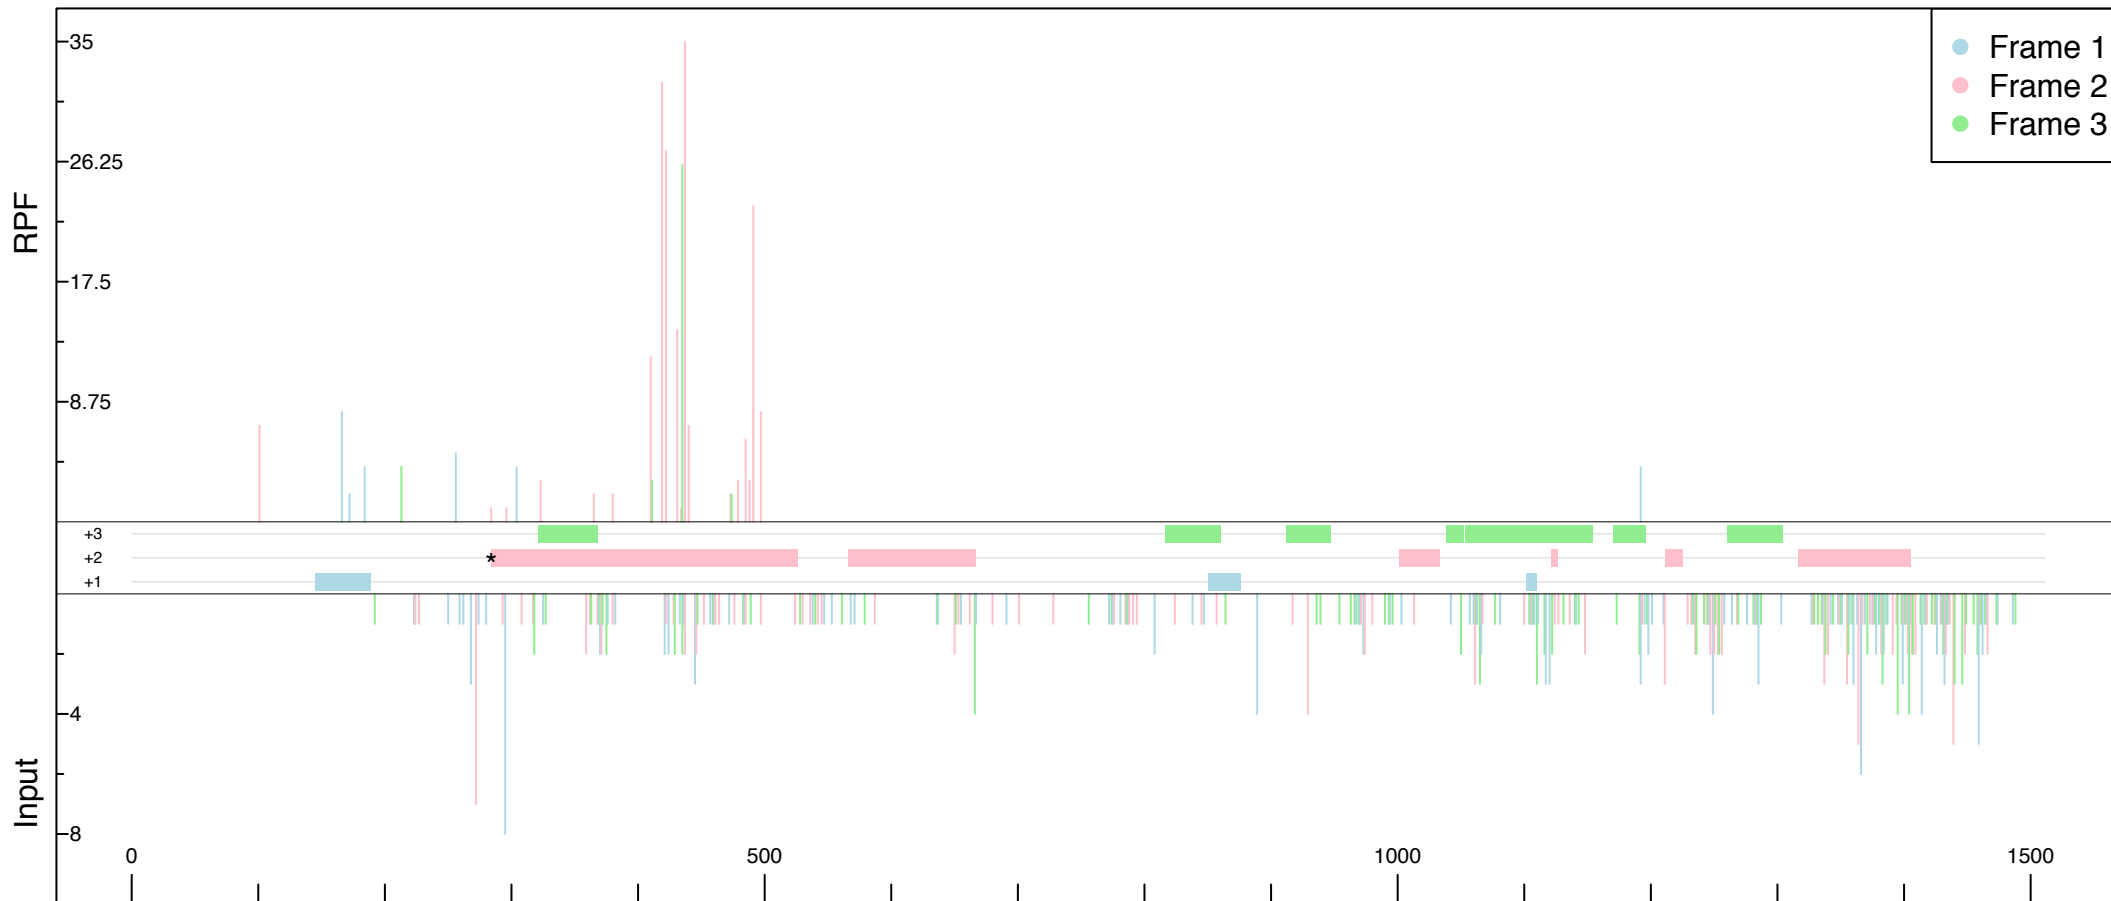

\*MGMCLPCLSGAEDDVVVTPDPETRRKQLAEAAEKRQKETTYRGIKDPEALERKKKKQESEKQTMSSAPSGGGGLKWQVG

ENSDART00000147684, Global

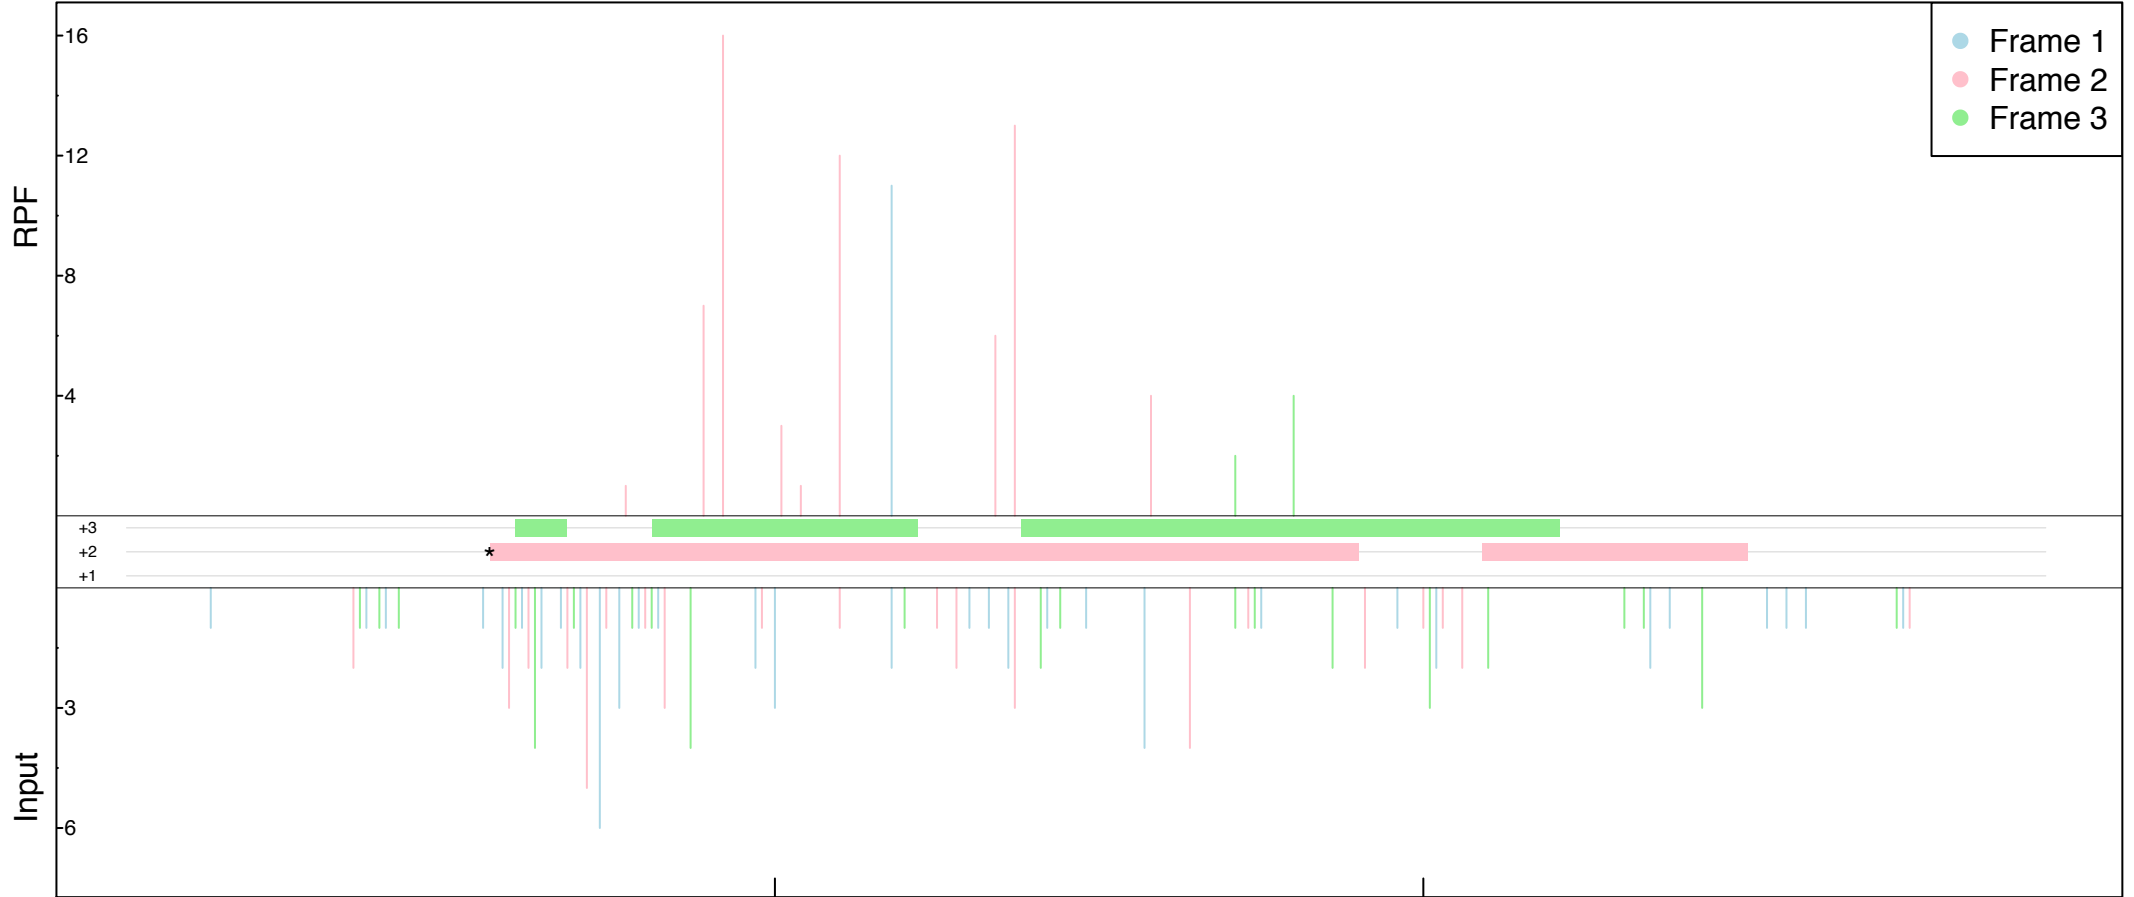

\*MDALMDDTDDKESAIHVPLGVLRSLDDAEQVFLSGKDYHYRS

ENSDART00000145861, Global

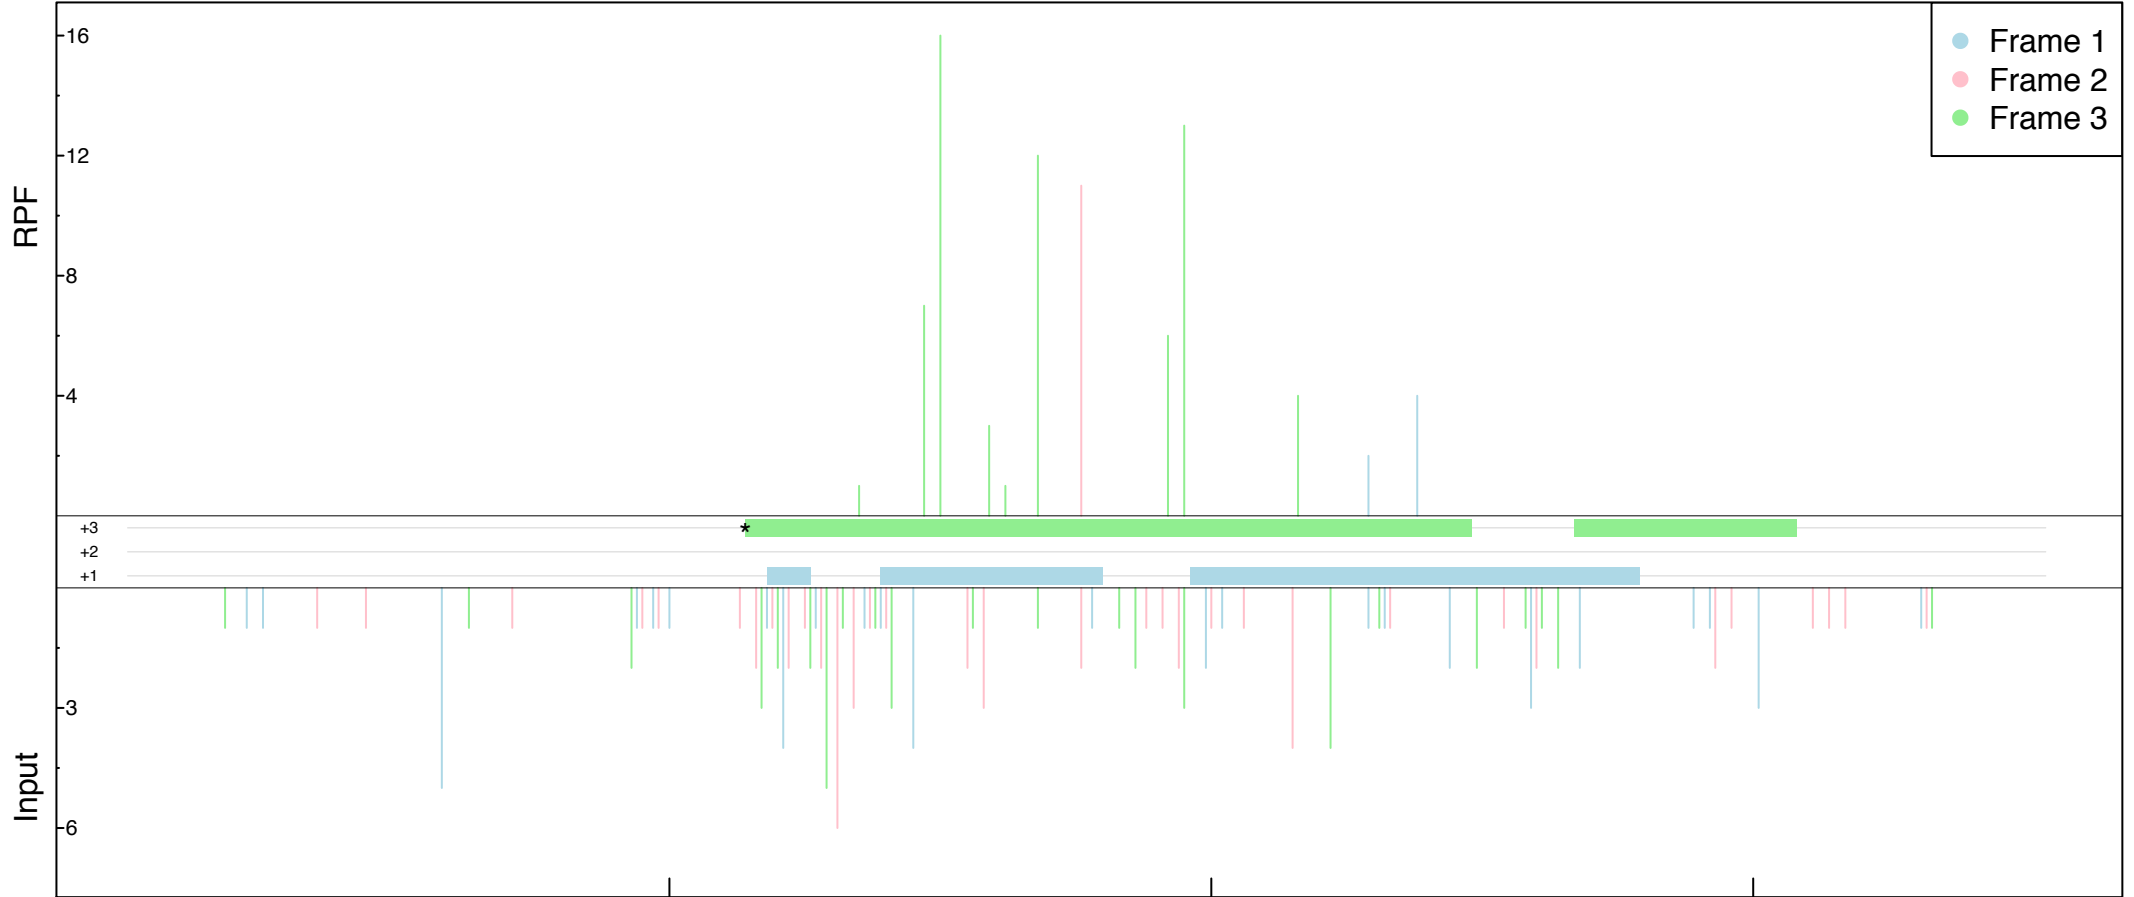

\*MDALMDDTDDKESAIHVPLGVLRWSLDDAEQVFLSGKDYHYRS

ENSDART00000144788, Global

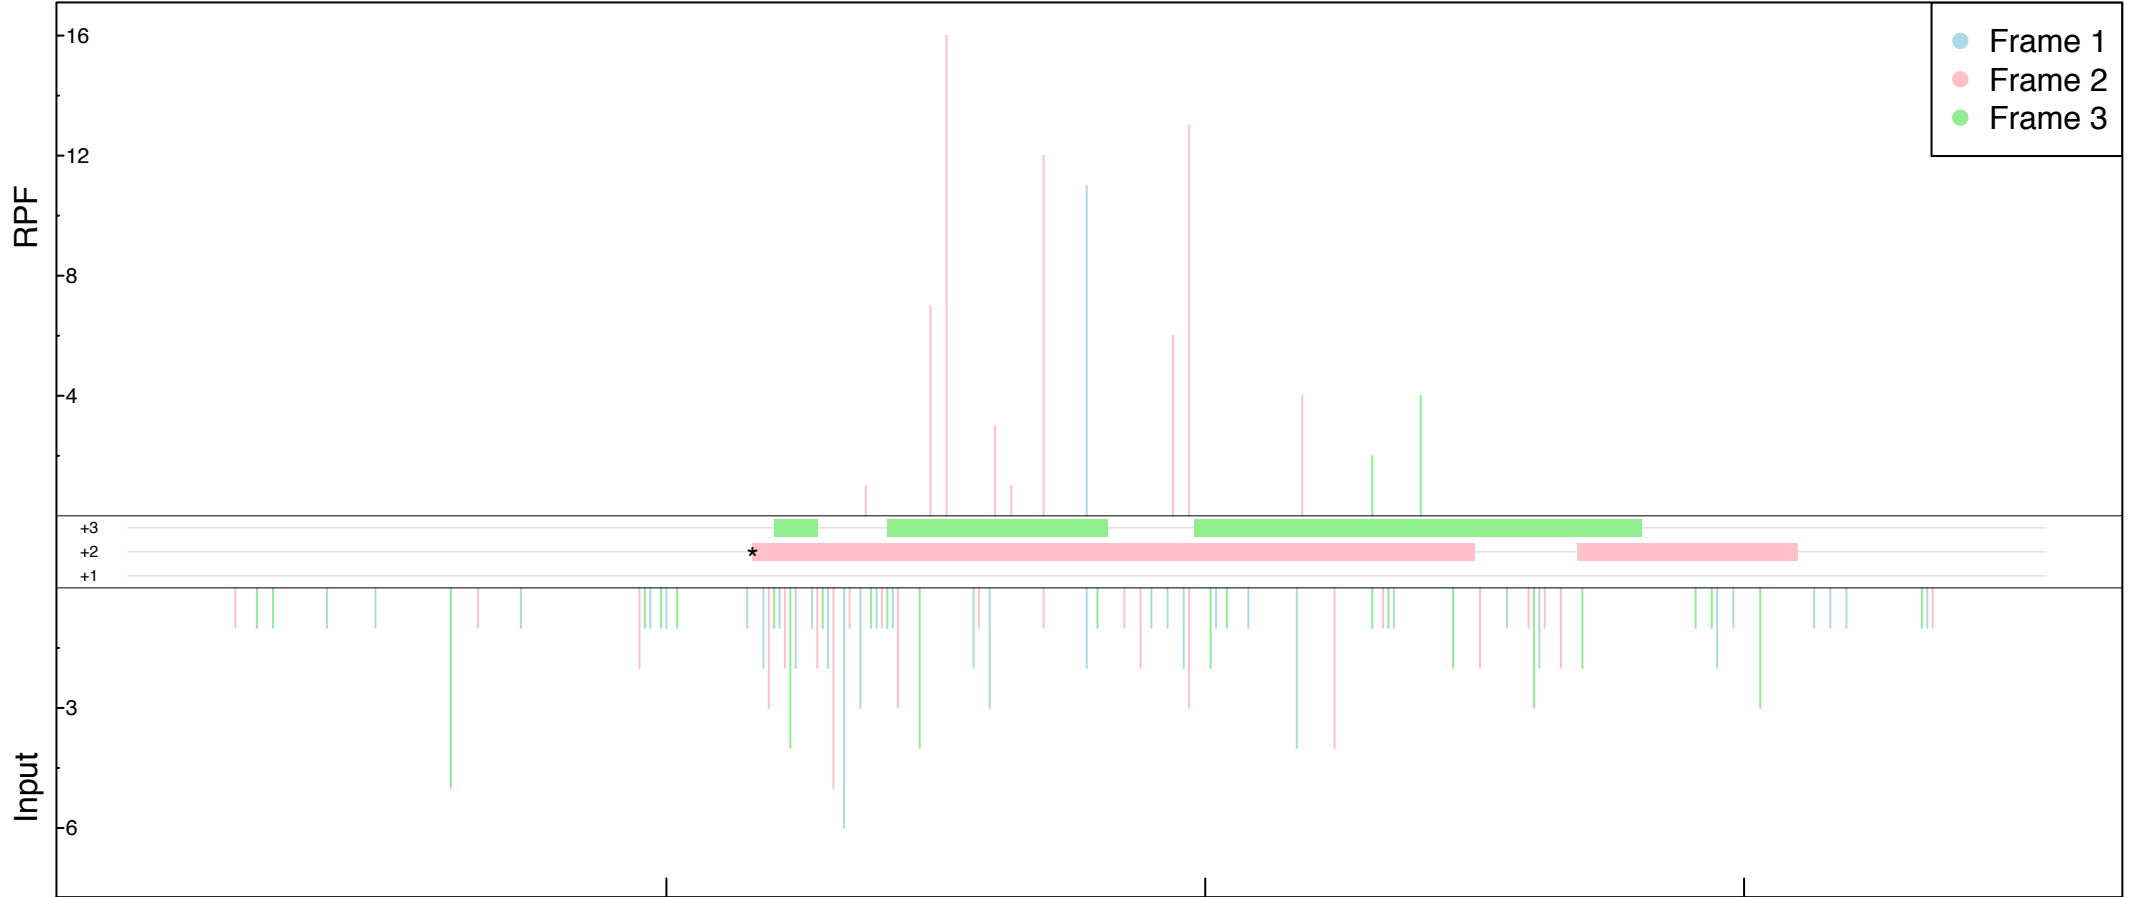

\*MDALMDDTDDKESAIHVPLGVLRWSLDDAEQVFLSGKDYHYRS

ENSDART00000151616, Global

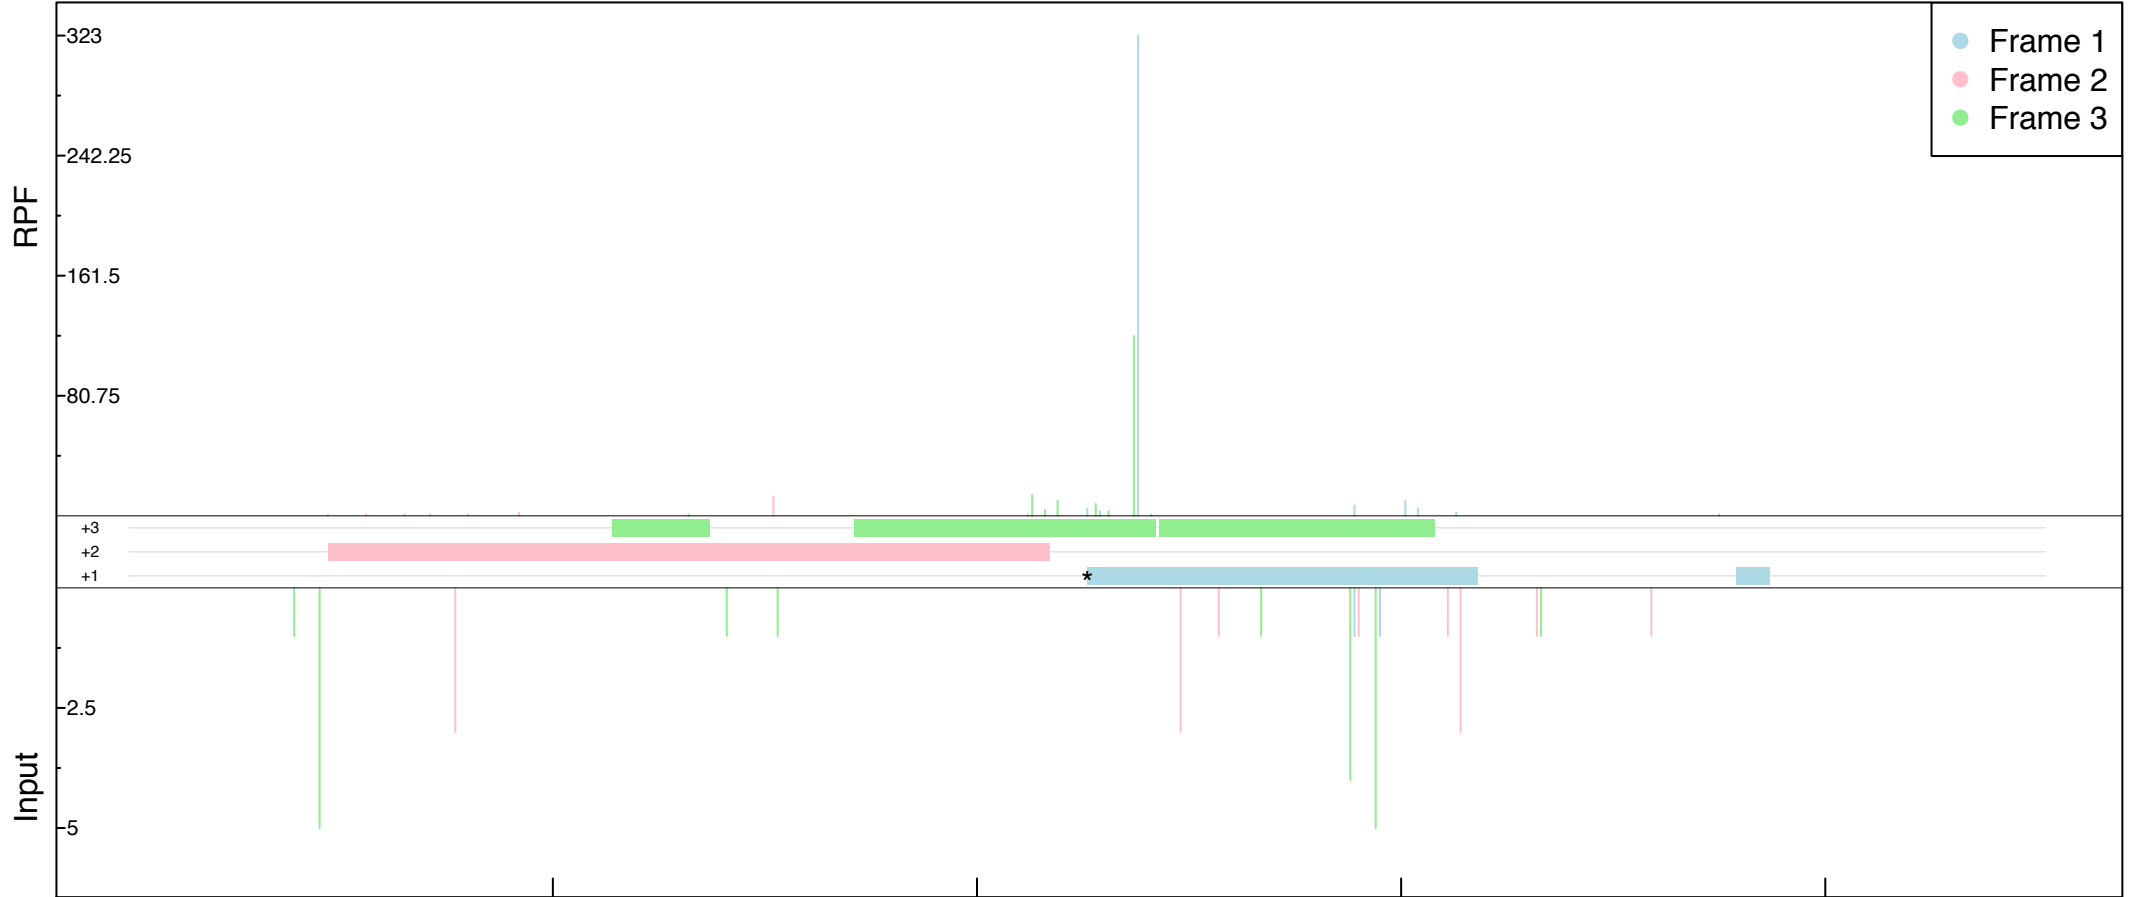

\*MVNLTECIHQPSPTKSELQGLVLKVPELD

linc-zgc:112305, Global

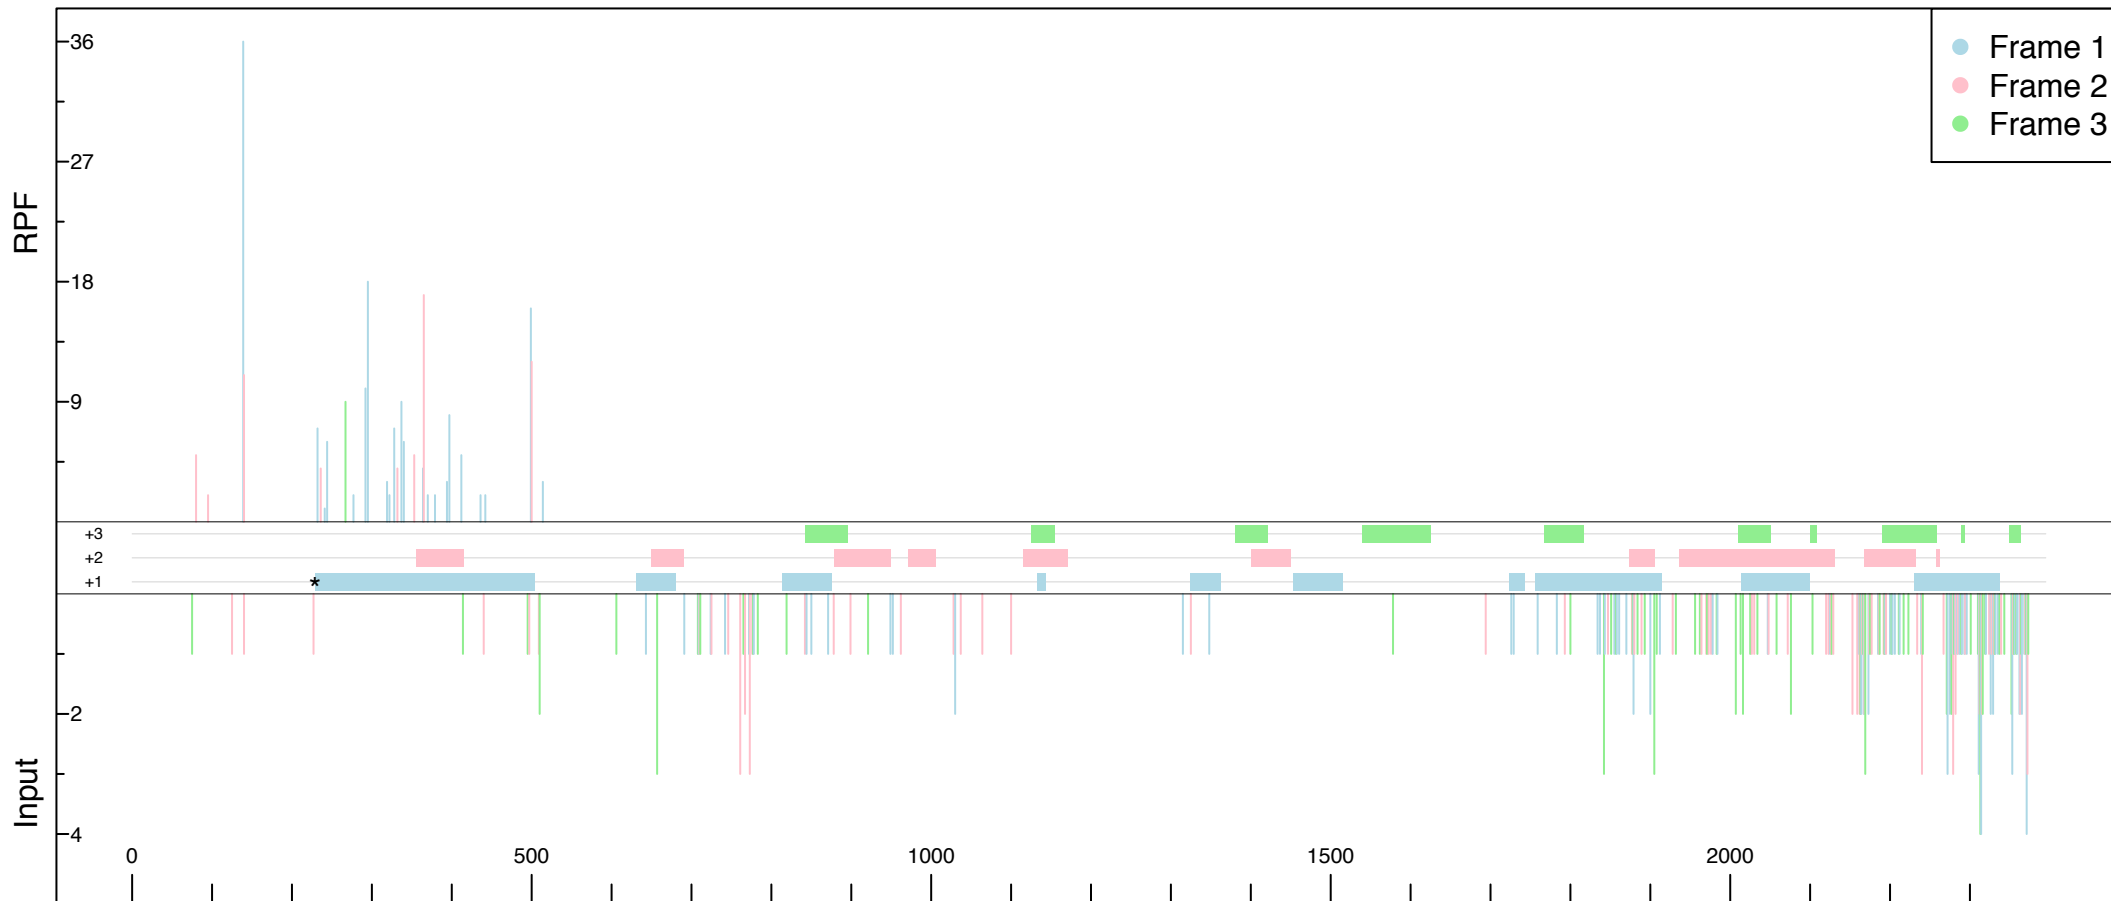

\*MEAKAKGAPKSASKAEKKEAAPPAKDPVPAEPTPEKPAEDGSTNQQGA AESAGSCCETLES LKPFLIGGAVIALGAVLVGVILLAKKN

ENSDART00000137159, Global

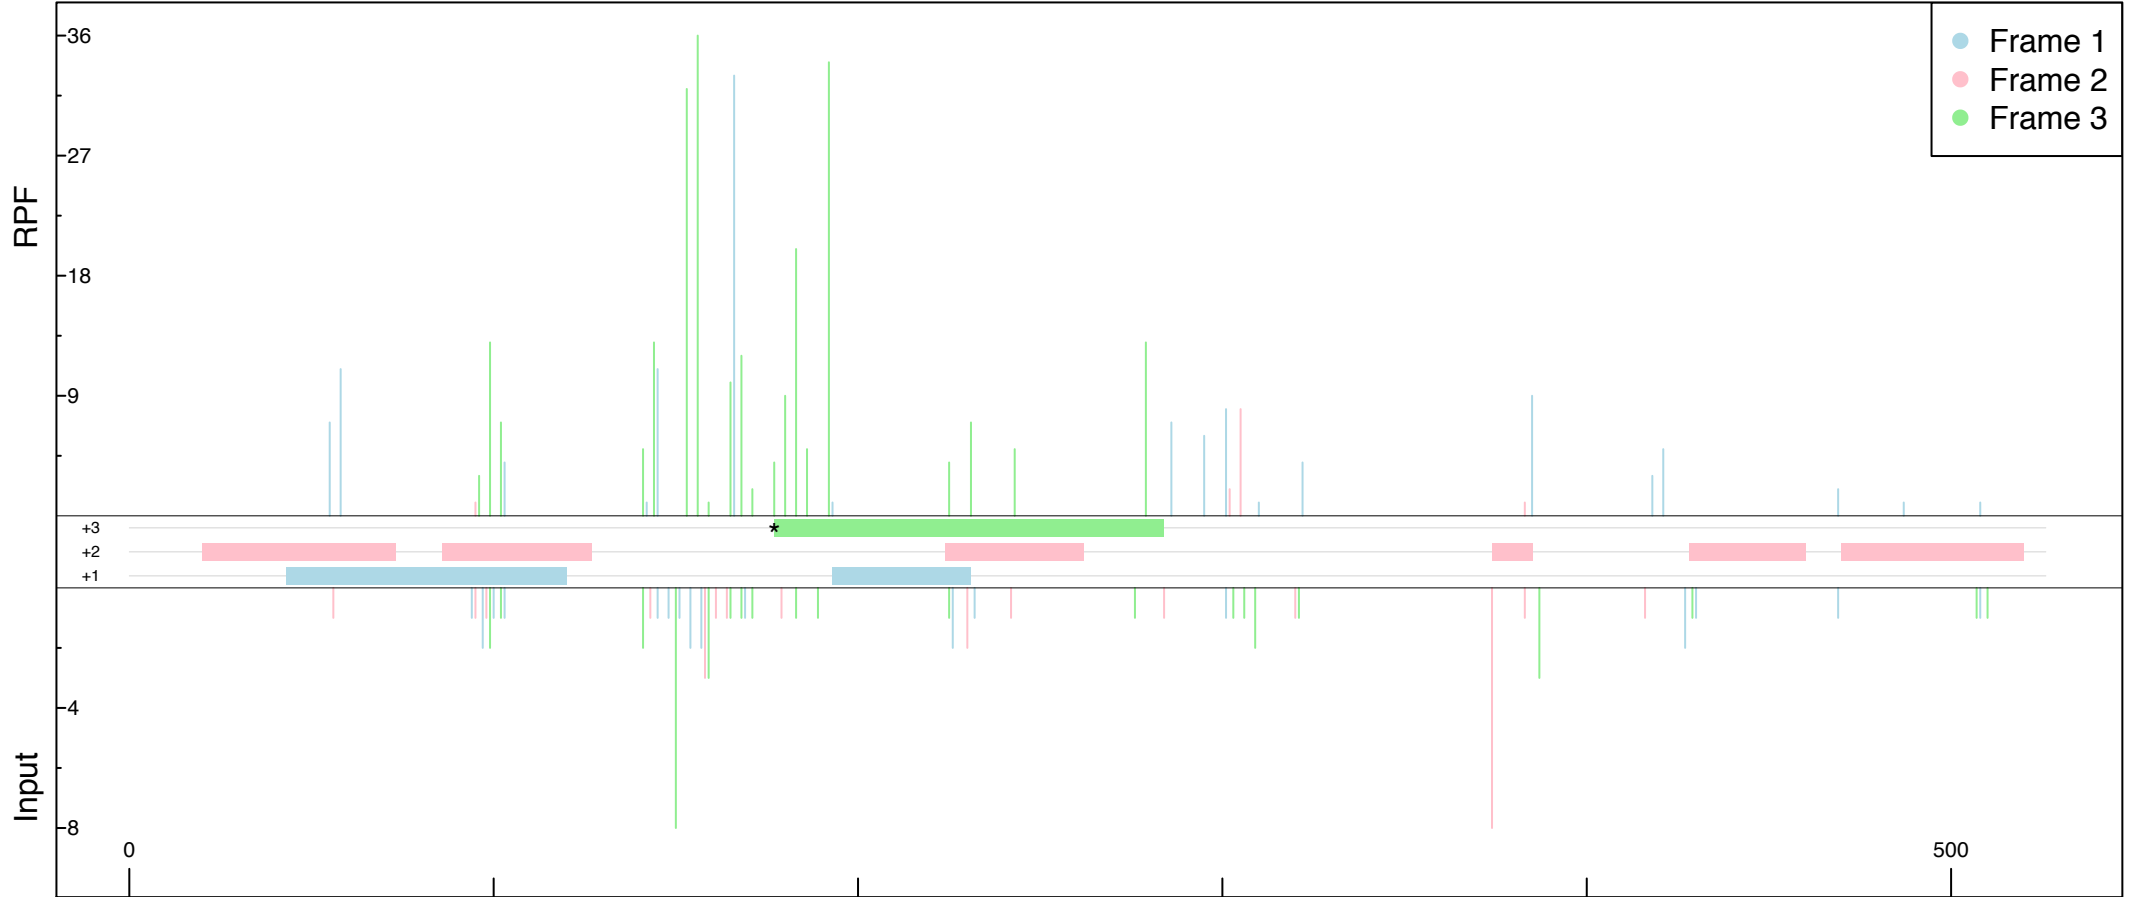

\*MLLDRNGHLKLADFGTCMKMDSTGMVRCEHCCWDT



ENSDART00000136313, Global

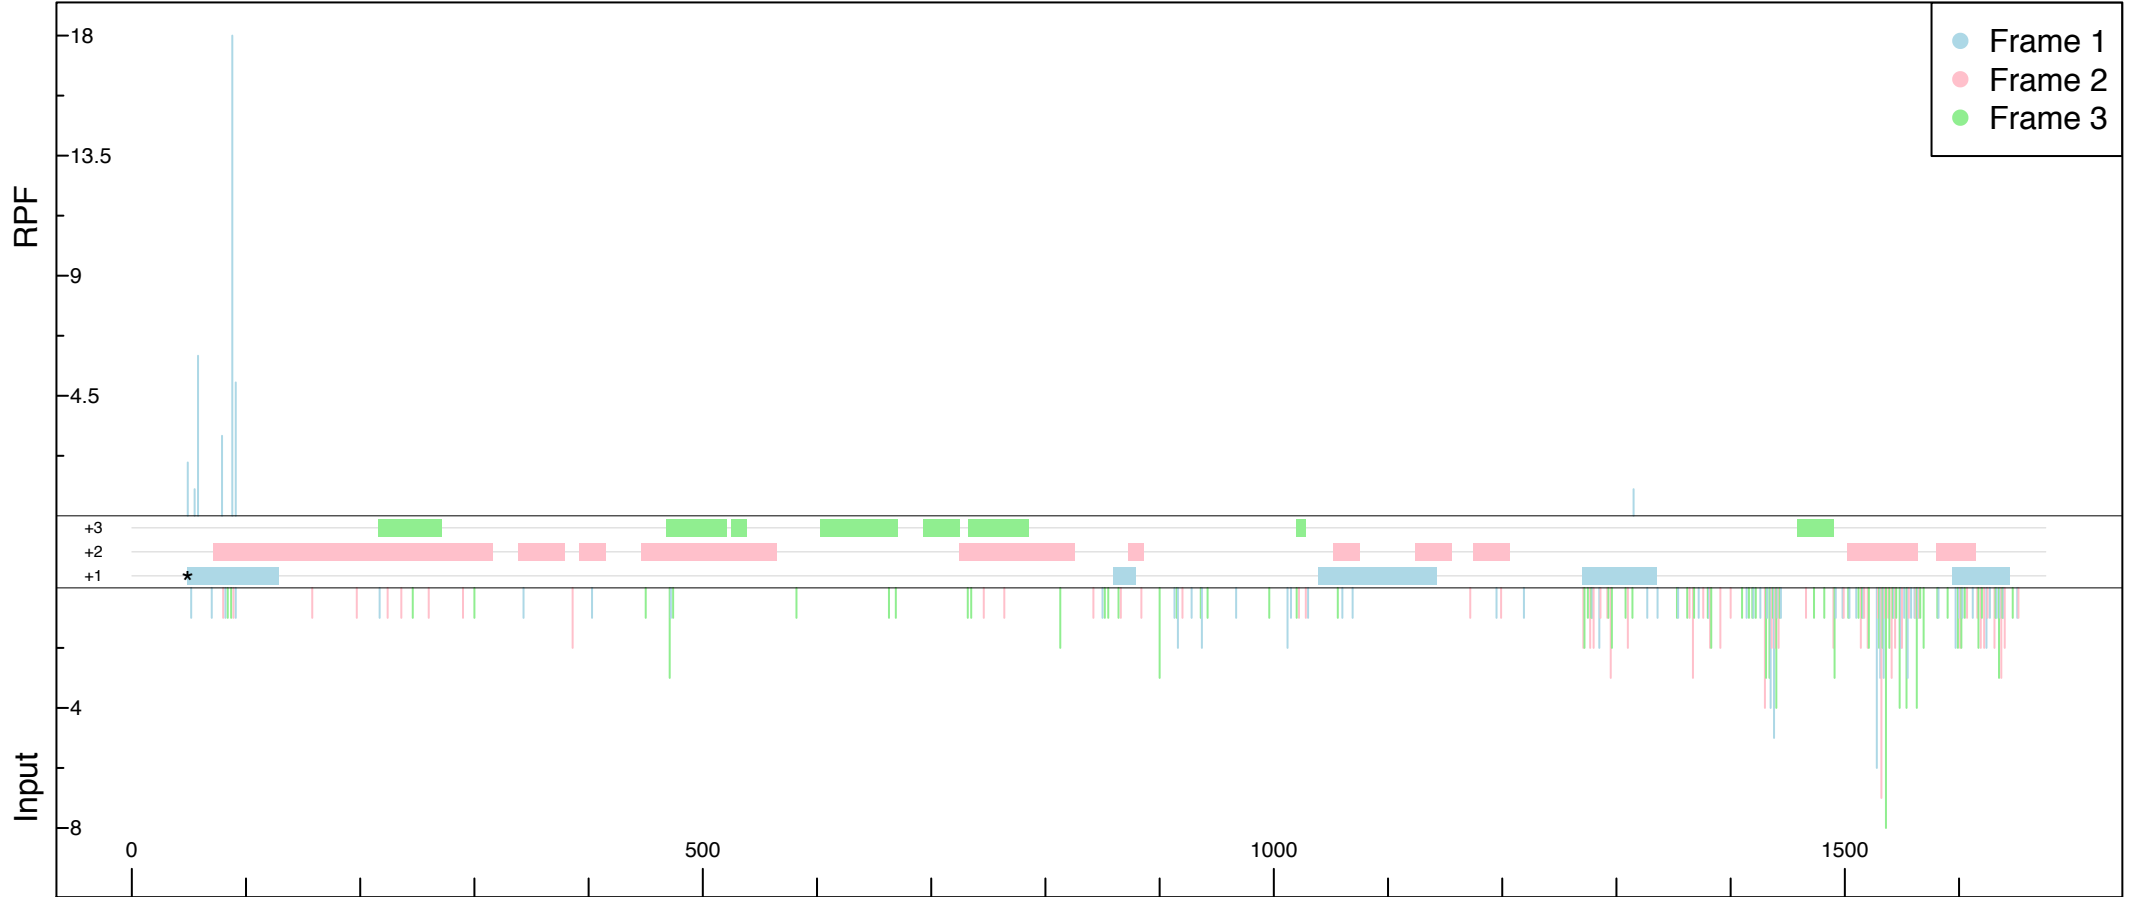

\*MVLSEGSDEEDEDDEDDDENSGVCCQG

ENSDART00000144157, Global

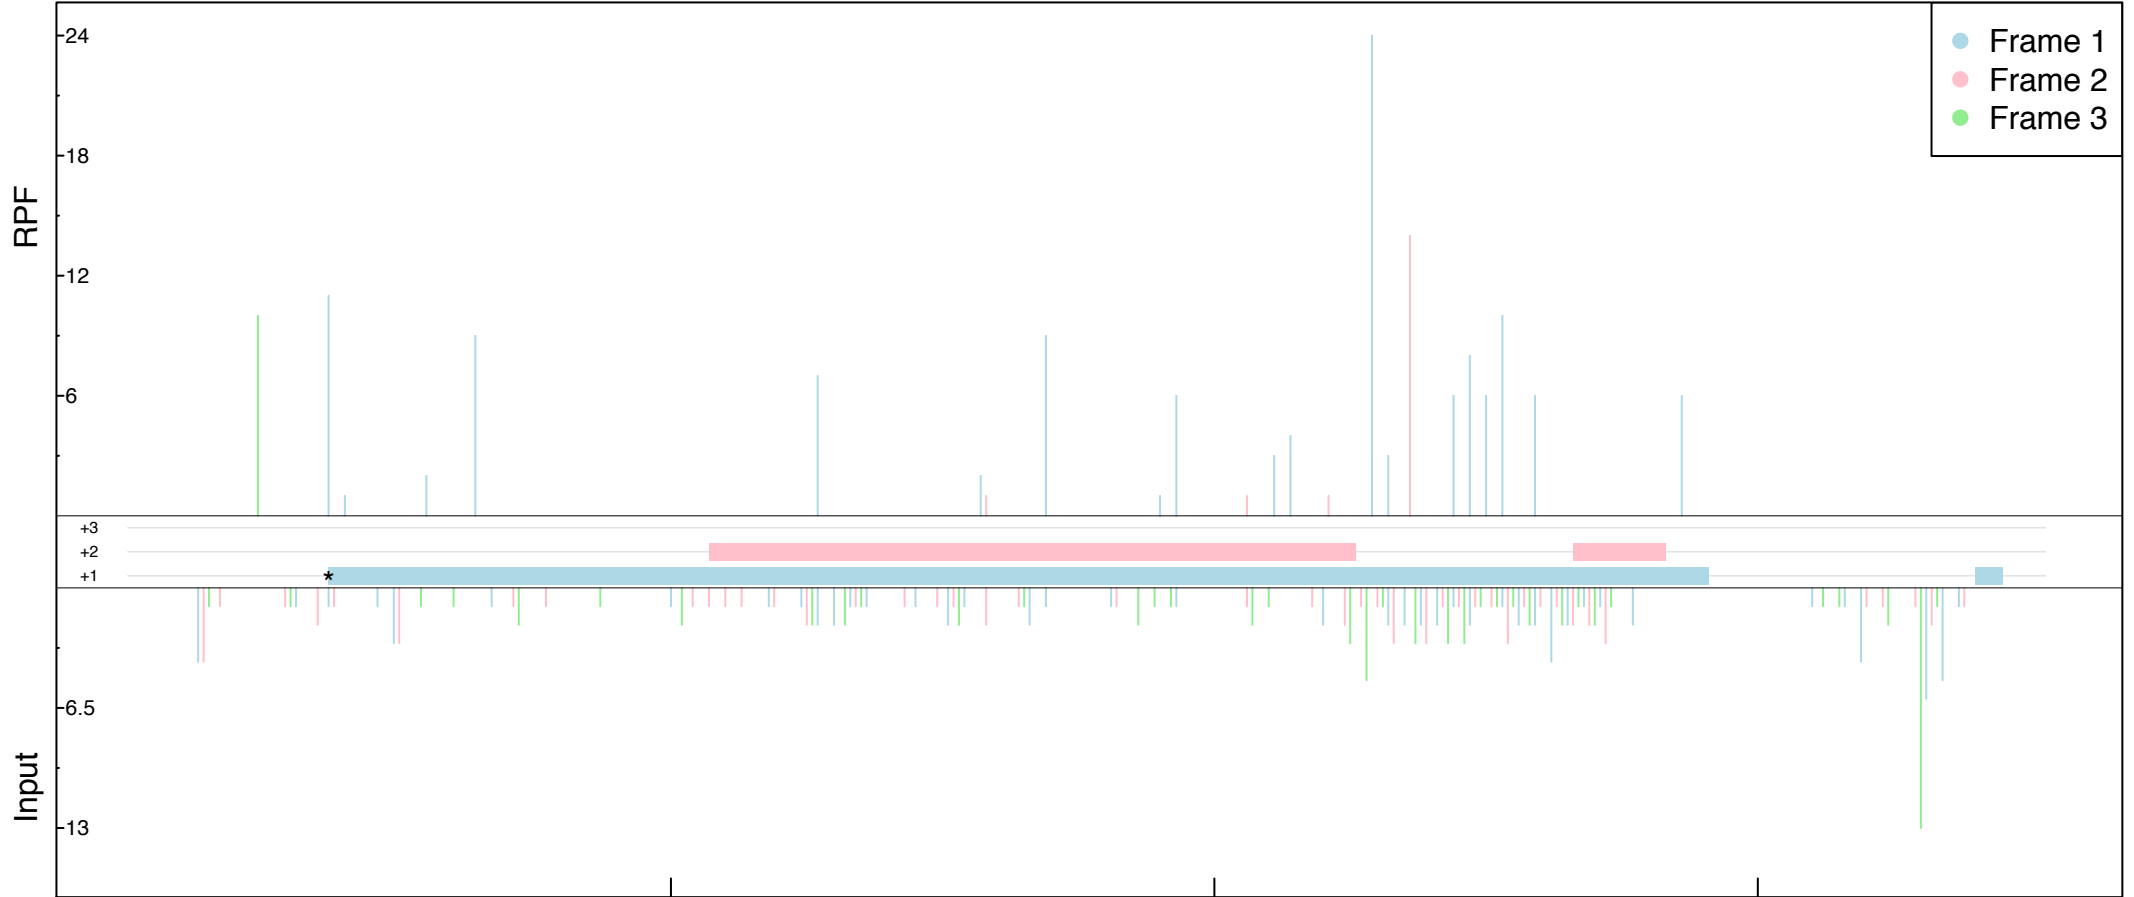

\*MSTDCVRSLSDKAEHTLTMHEHLYEMDNQKHVAEEHQQGKLGQKKPRRKDTPVLNSPPLLPGVRLMKTEARMIHQEDEEKEMKK

# linc-rbl1, Global

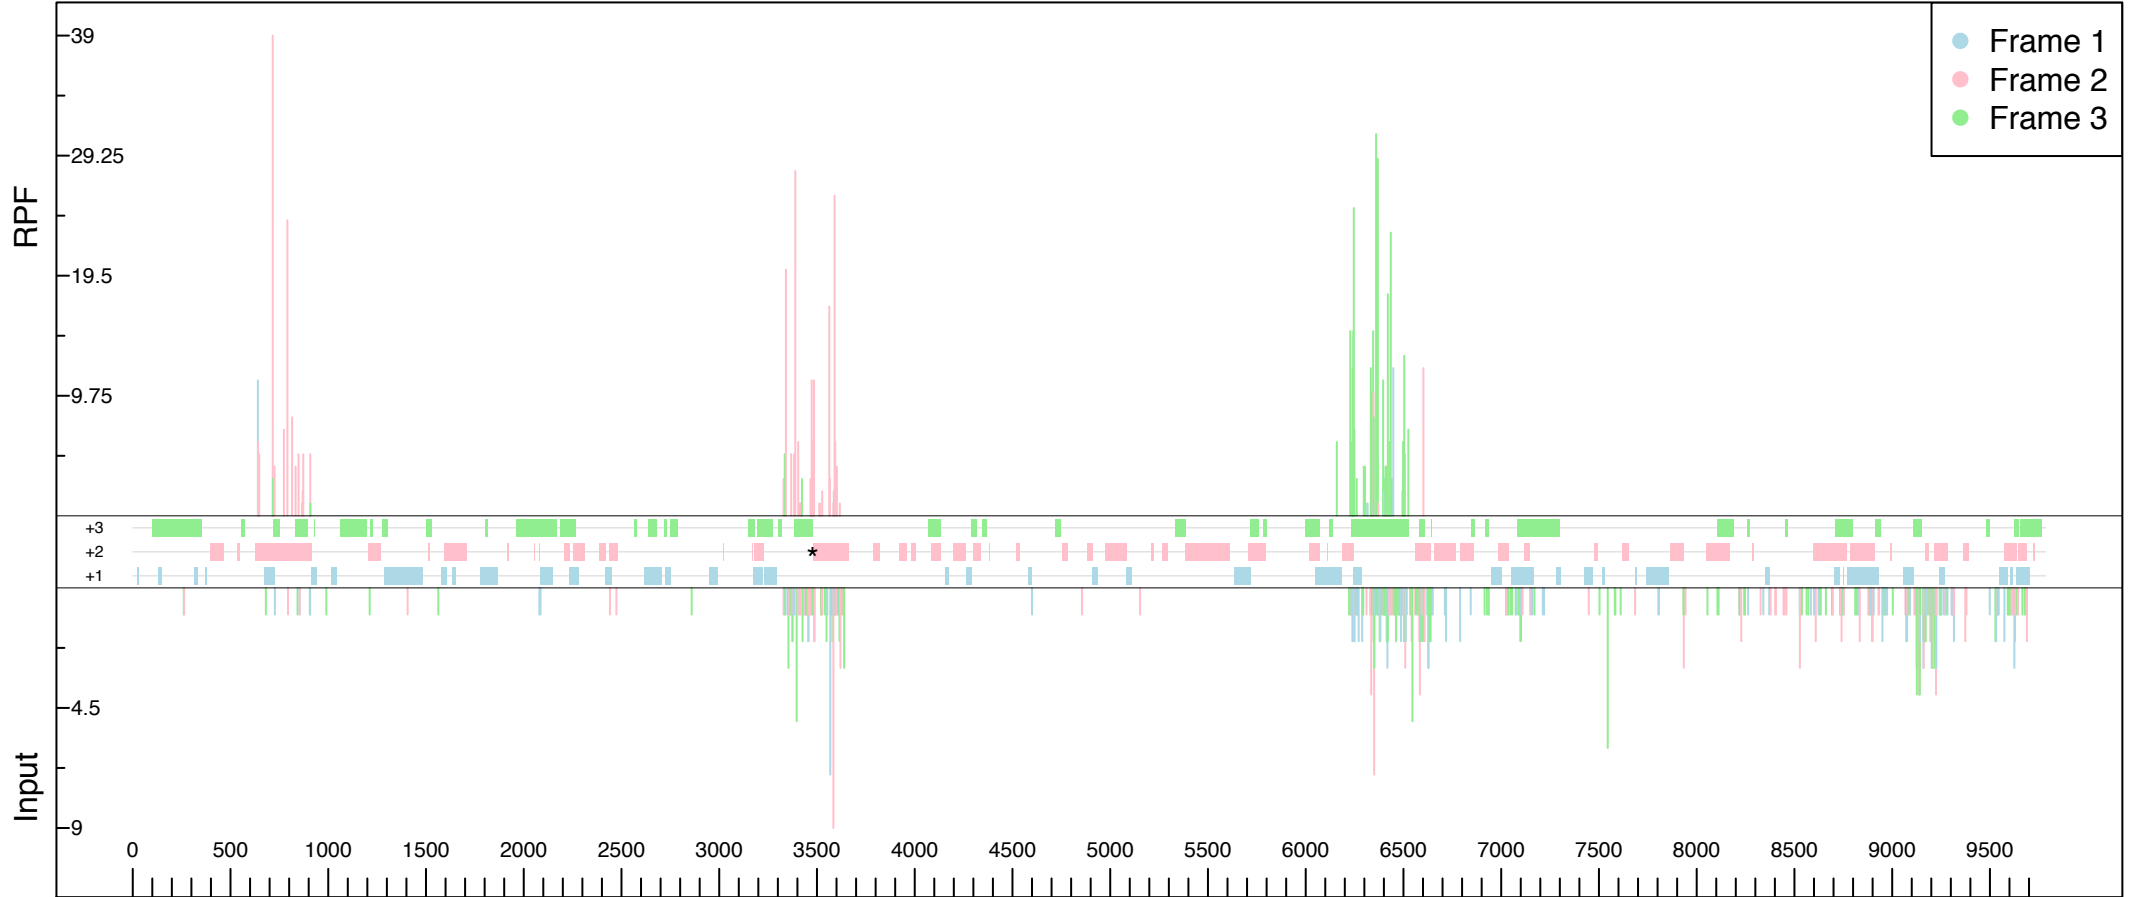

\*MTMWKEMMEFQGNLLKEFIHRSSSSTSLPSLPSYSRPAHHNQGPSTFPSTSYMAPYTSPE

# ENSDART00000148146, Global

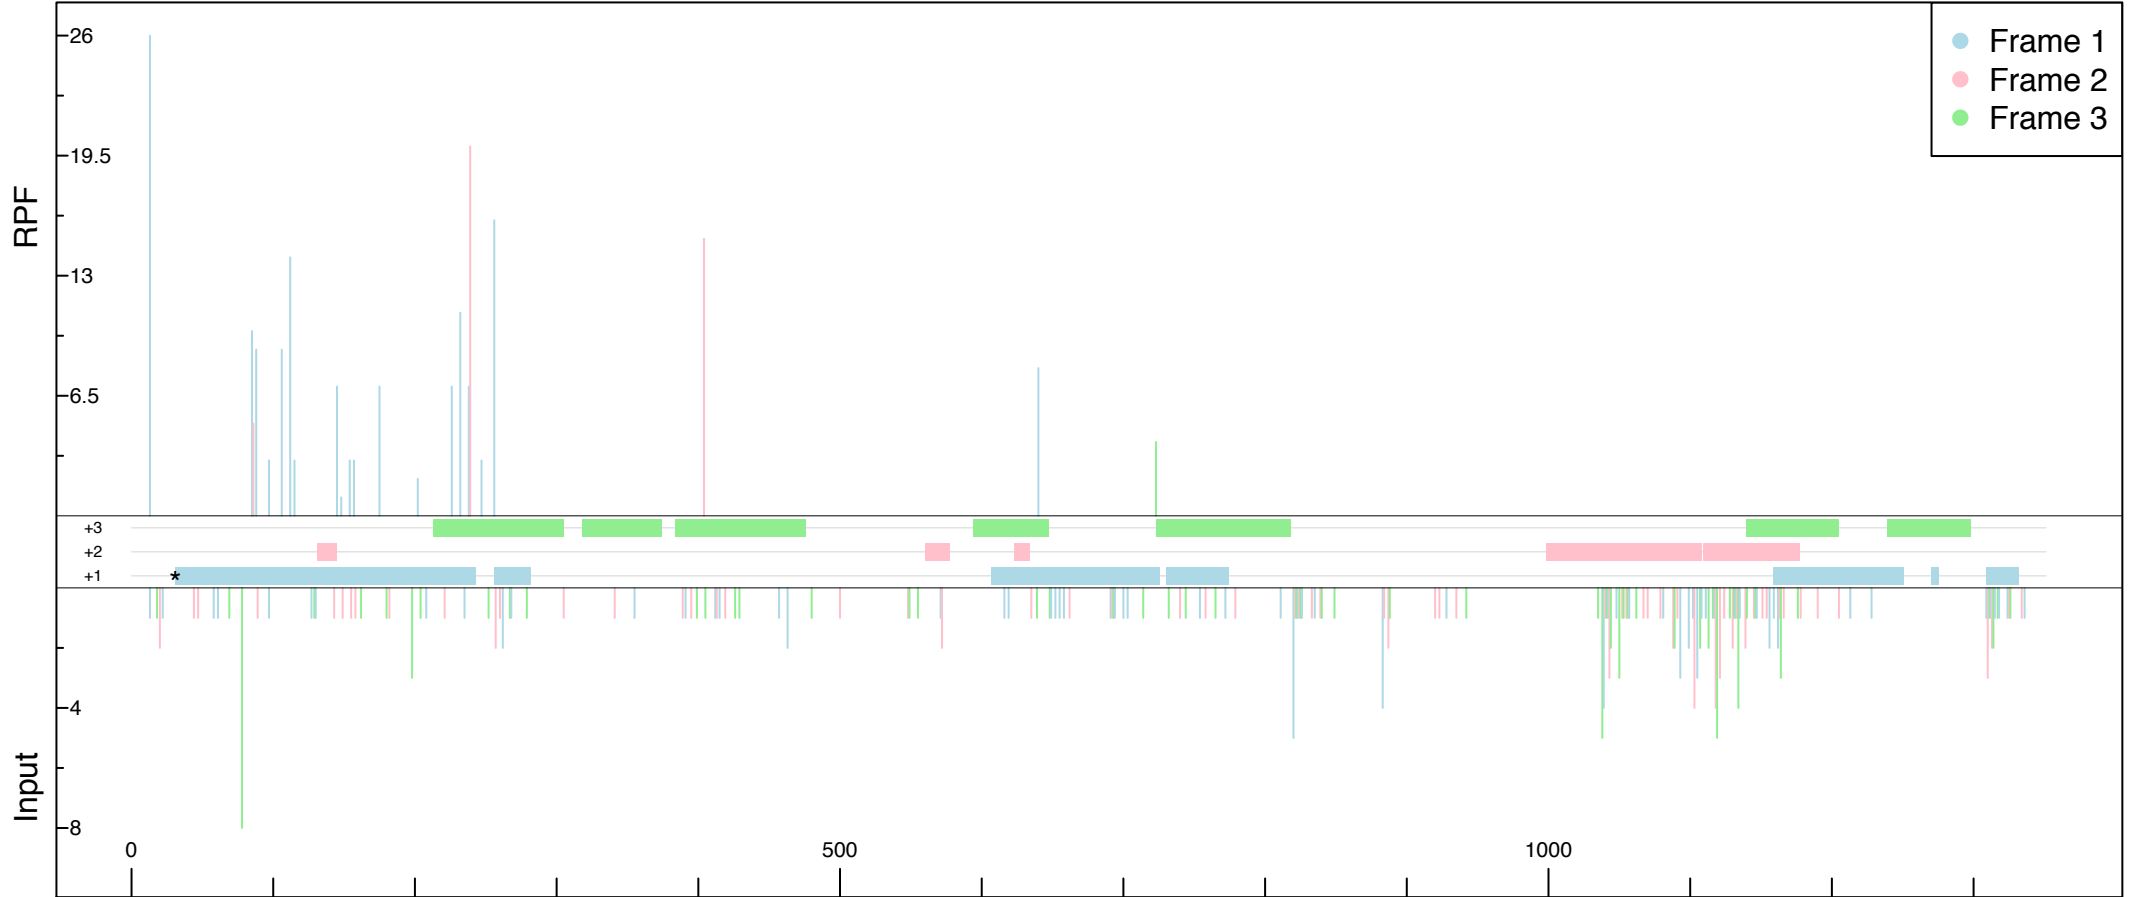

\*MSAARLISLTAFCITLFQSGSAQLGESKVNARPYEILLRQNLVLLLSVLSTLLLFMIGMAVCVYKPLRRR

# ENSDART00000153117, Global

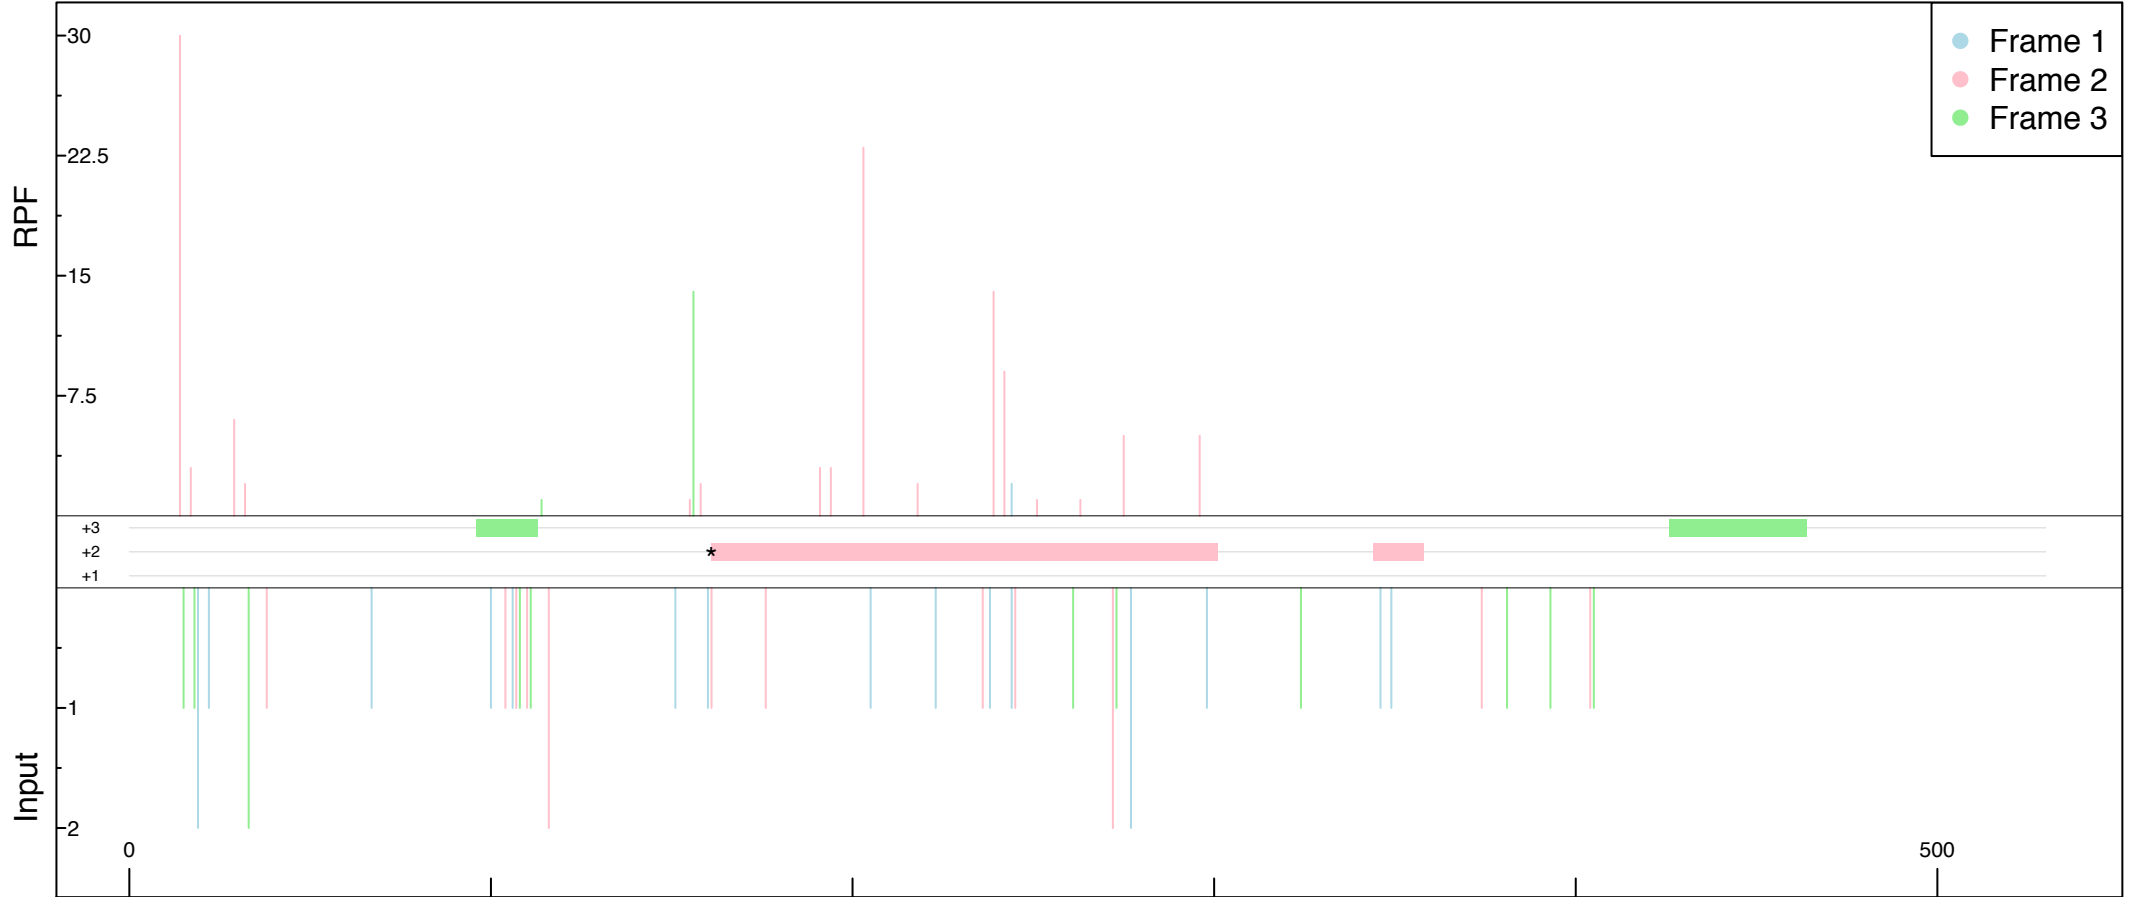

\*MSSKSGQYPLRPMSFAMSPAINPTMMRAMMEQRAALLQKARTGGQ

# ENSDART00000138677, Global

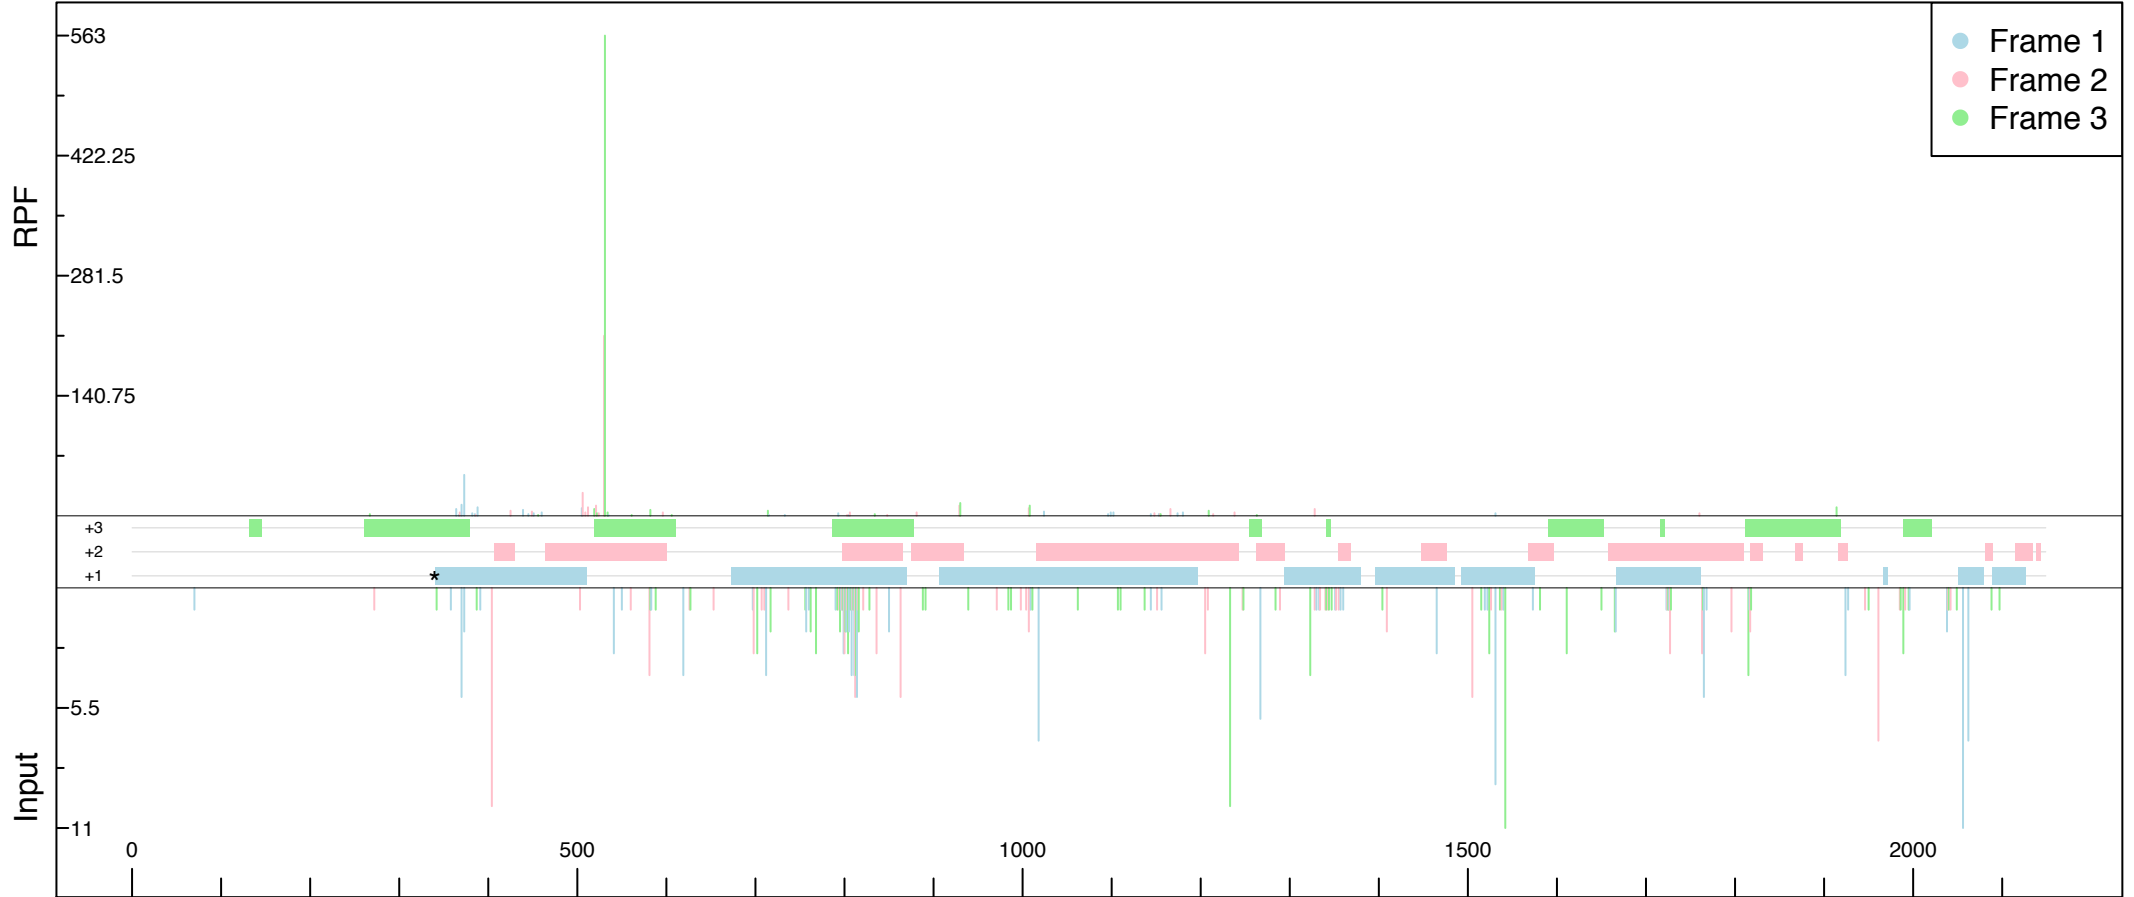

\*MDLKDAKKLEYAREDEAQTFAEDEVDEEAVECNNVIAAIGEDASSFKSNANVLRIQ

ENSDART00000131730, Global

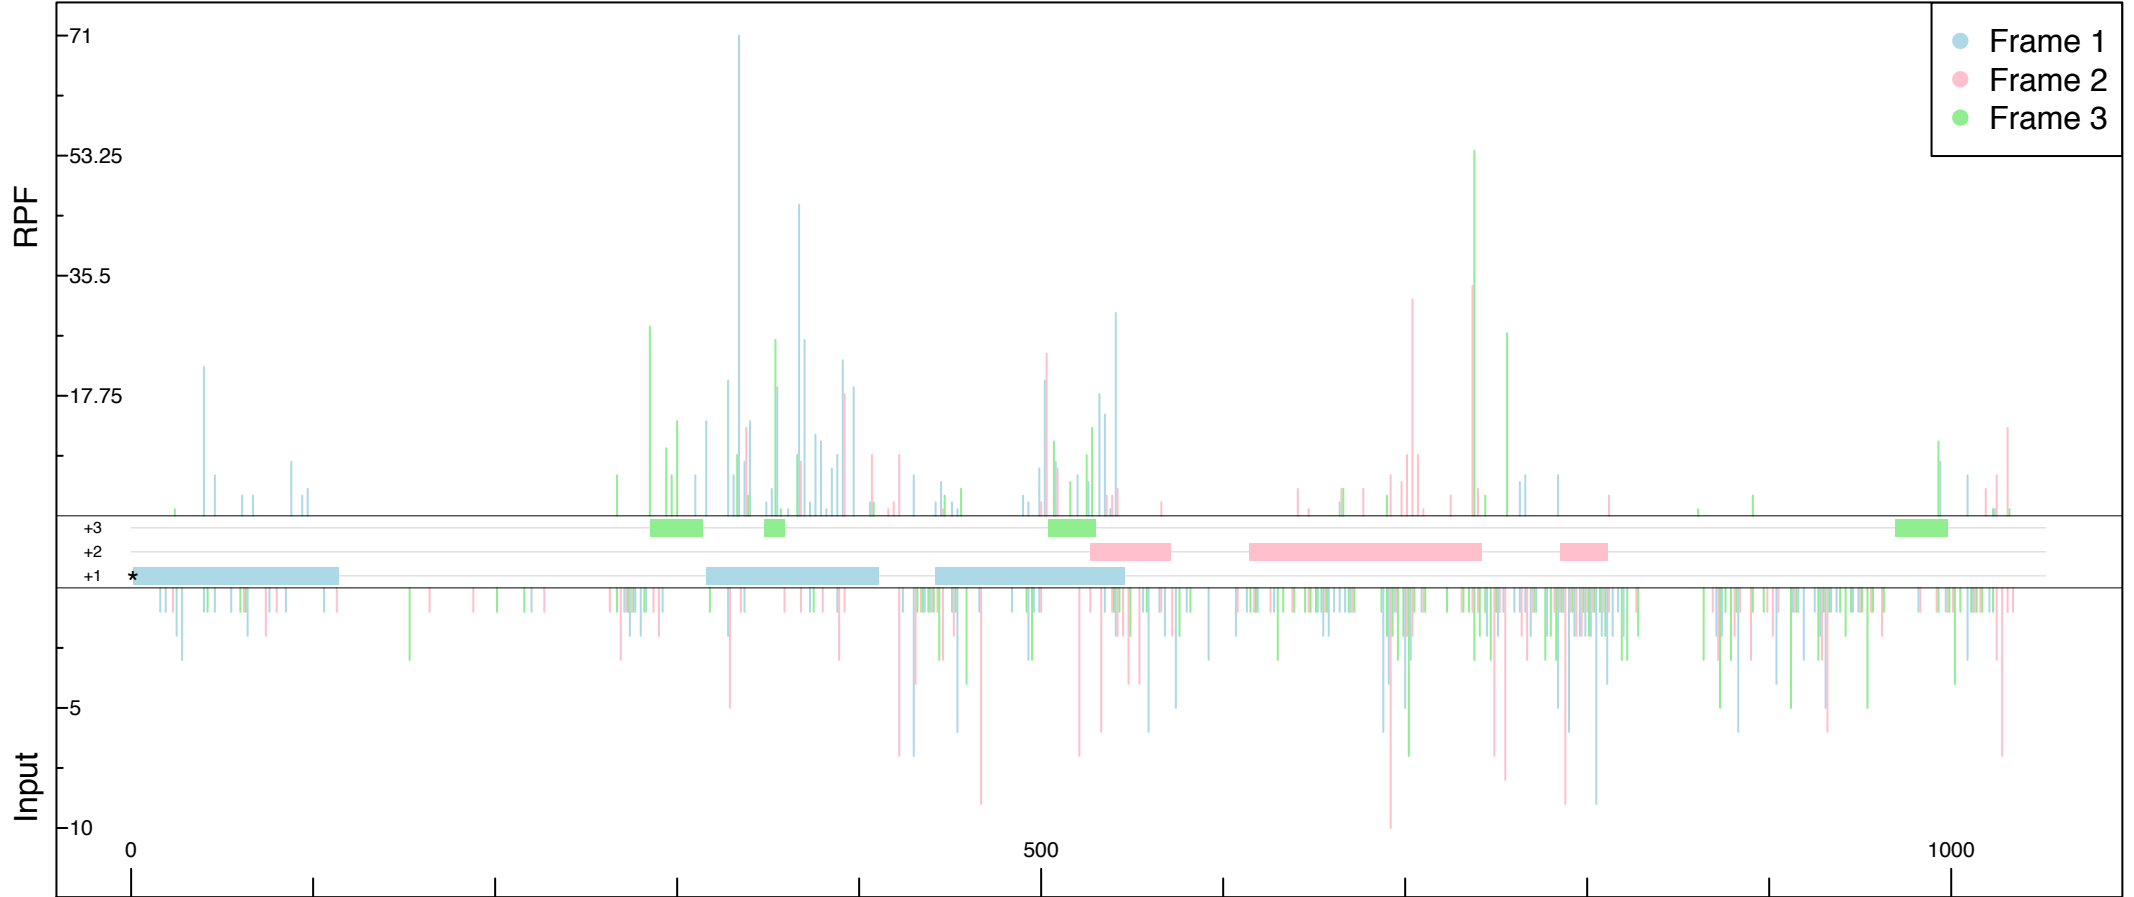

\*MADLLLRLTLTCARLMAELLLRVRLTSHLFLRICFSA

# ENSDART00000139822, Global

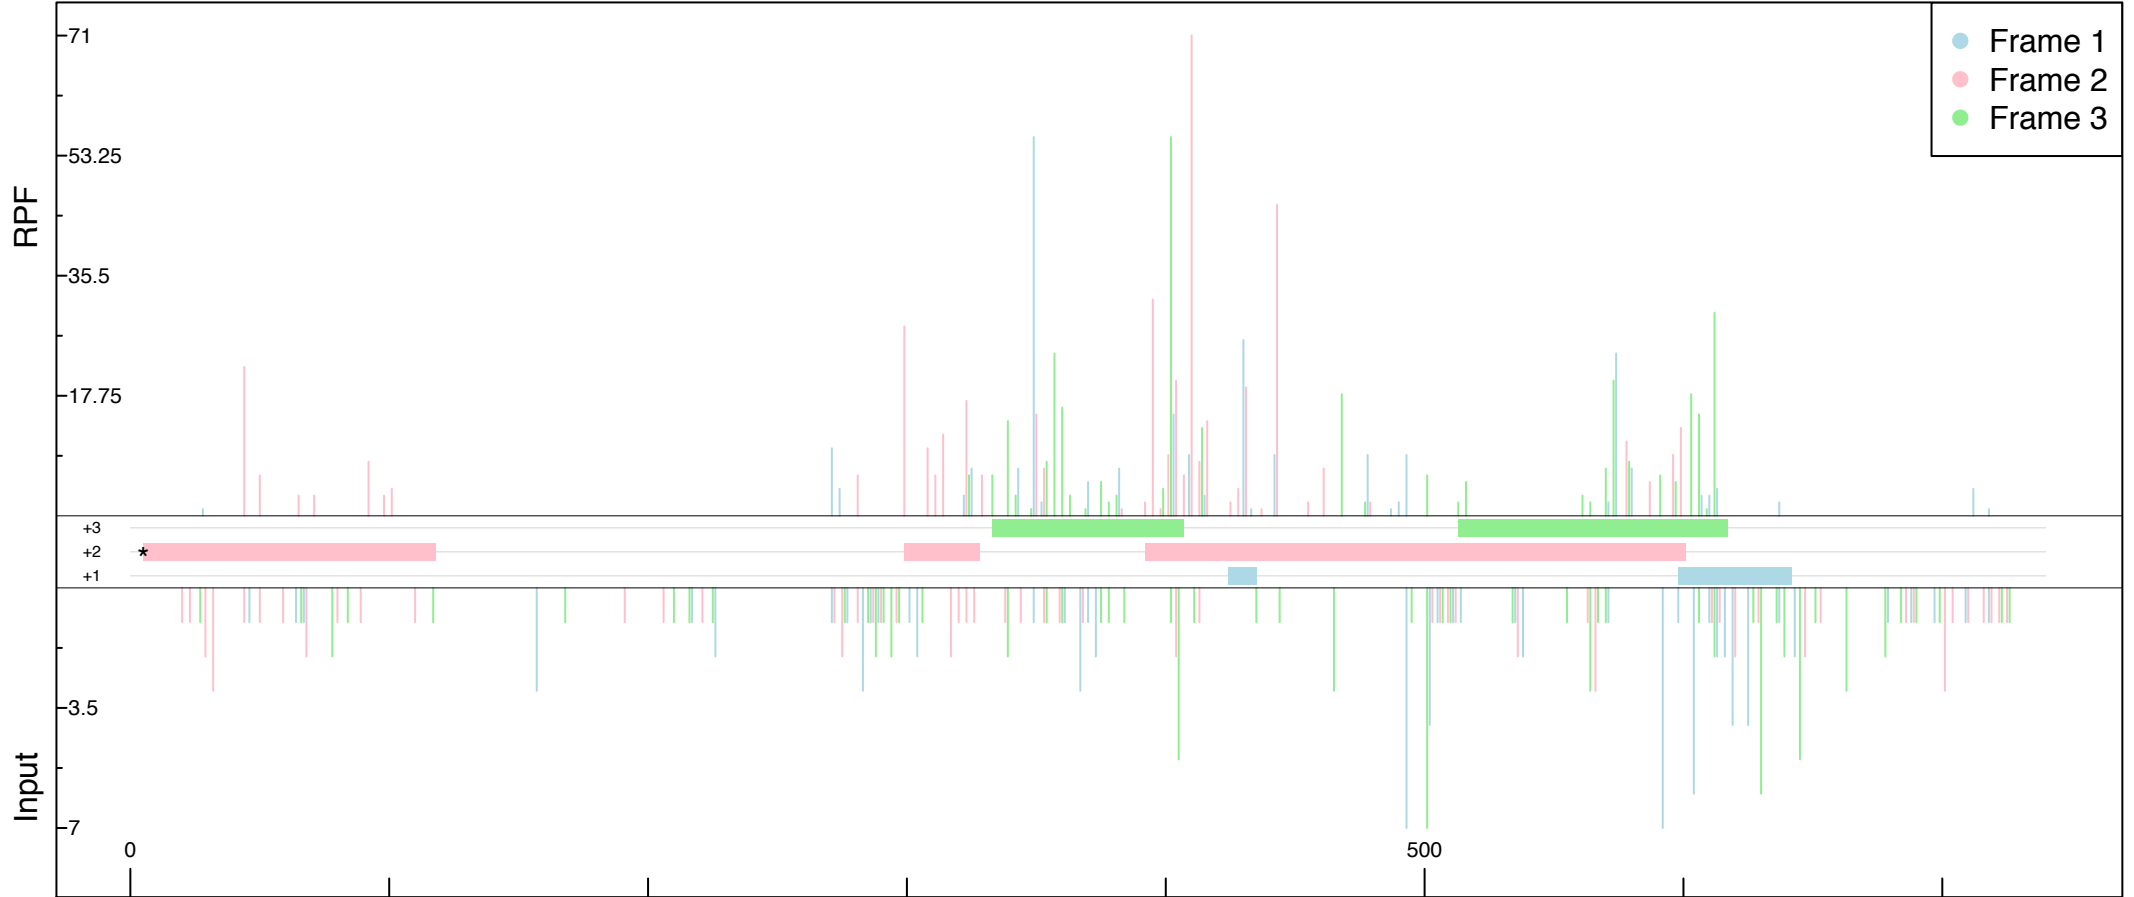

\*MADLLLRLTLTCARLMAELLRLVRLTSHLFLRICFSA



# ENSDART00000131332, Global

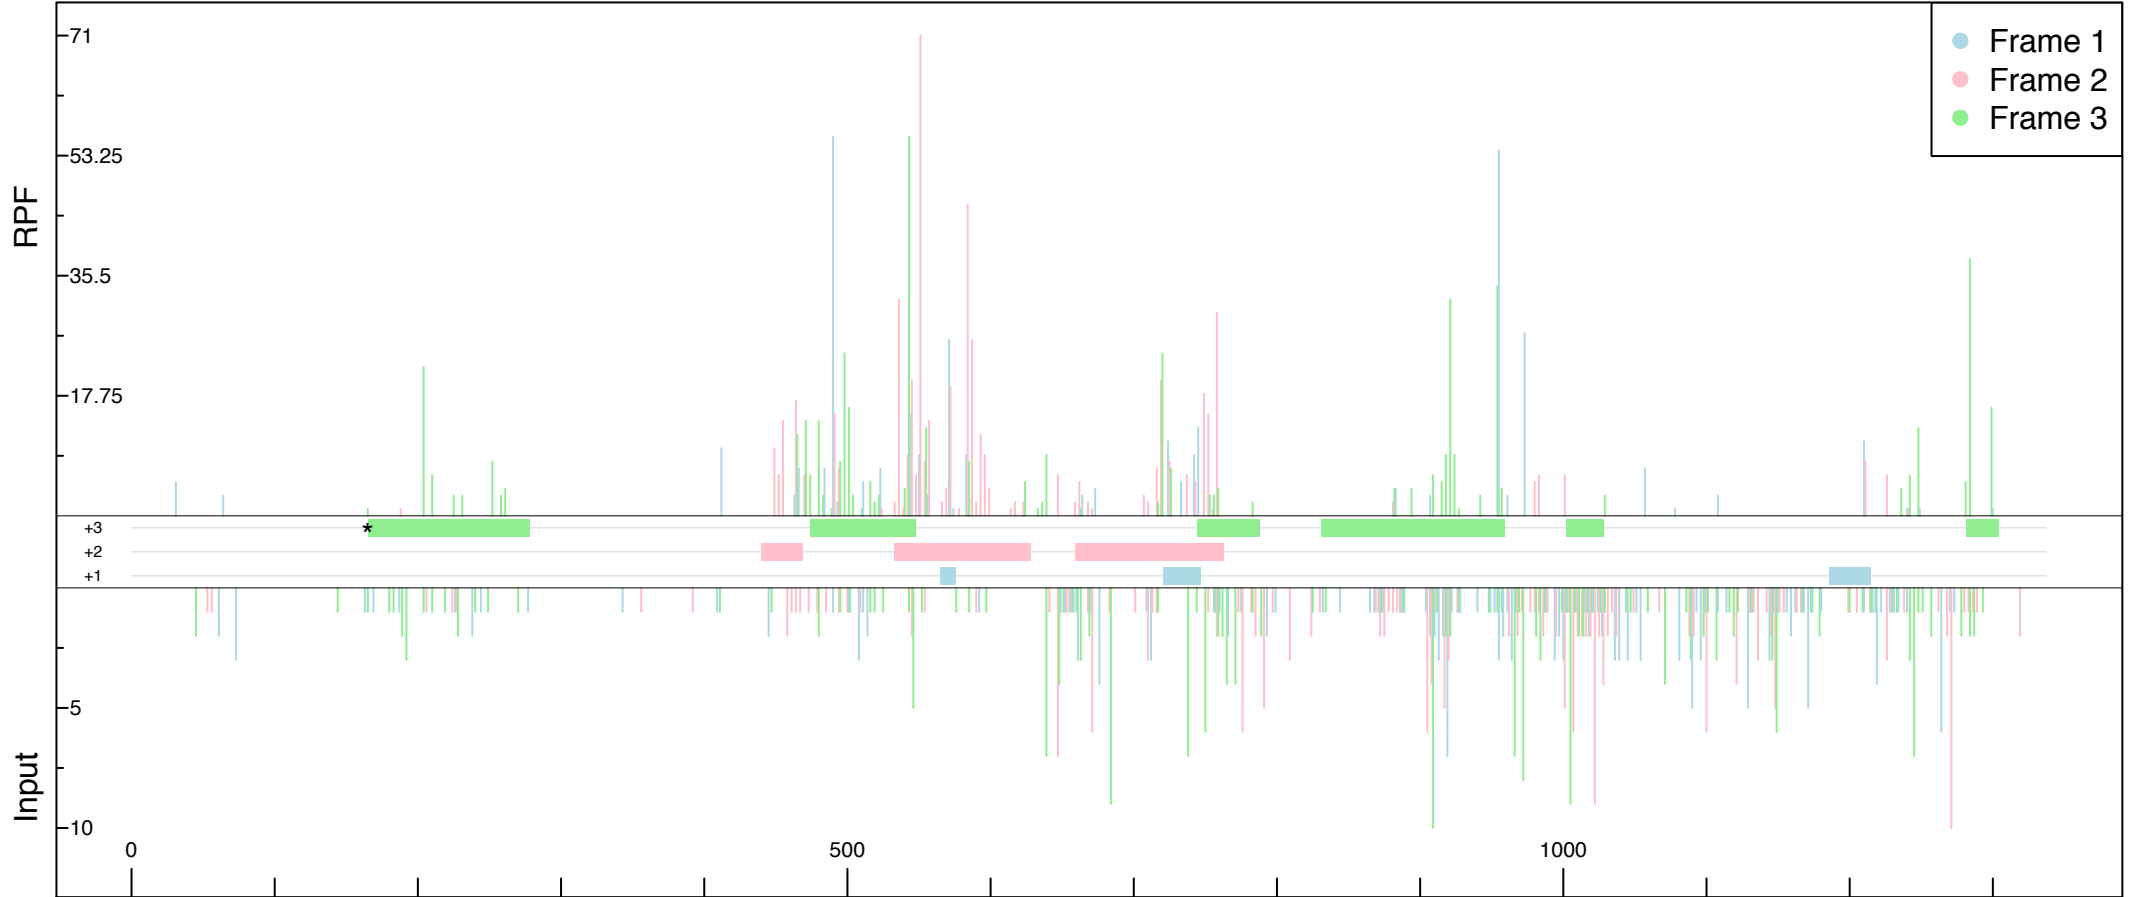

\*MADLLLRLTLTCARLMAELLRVRLTSHLFLRICFSA

# ENSDART00000150817, Global

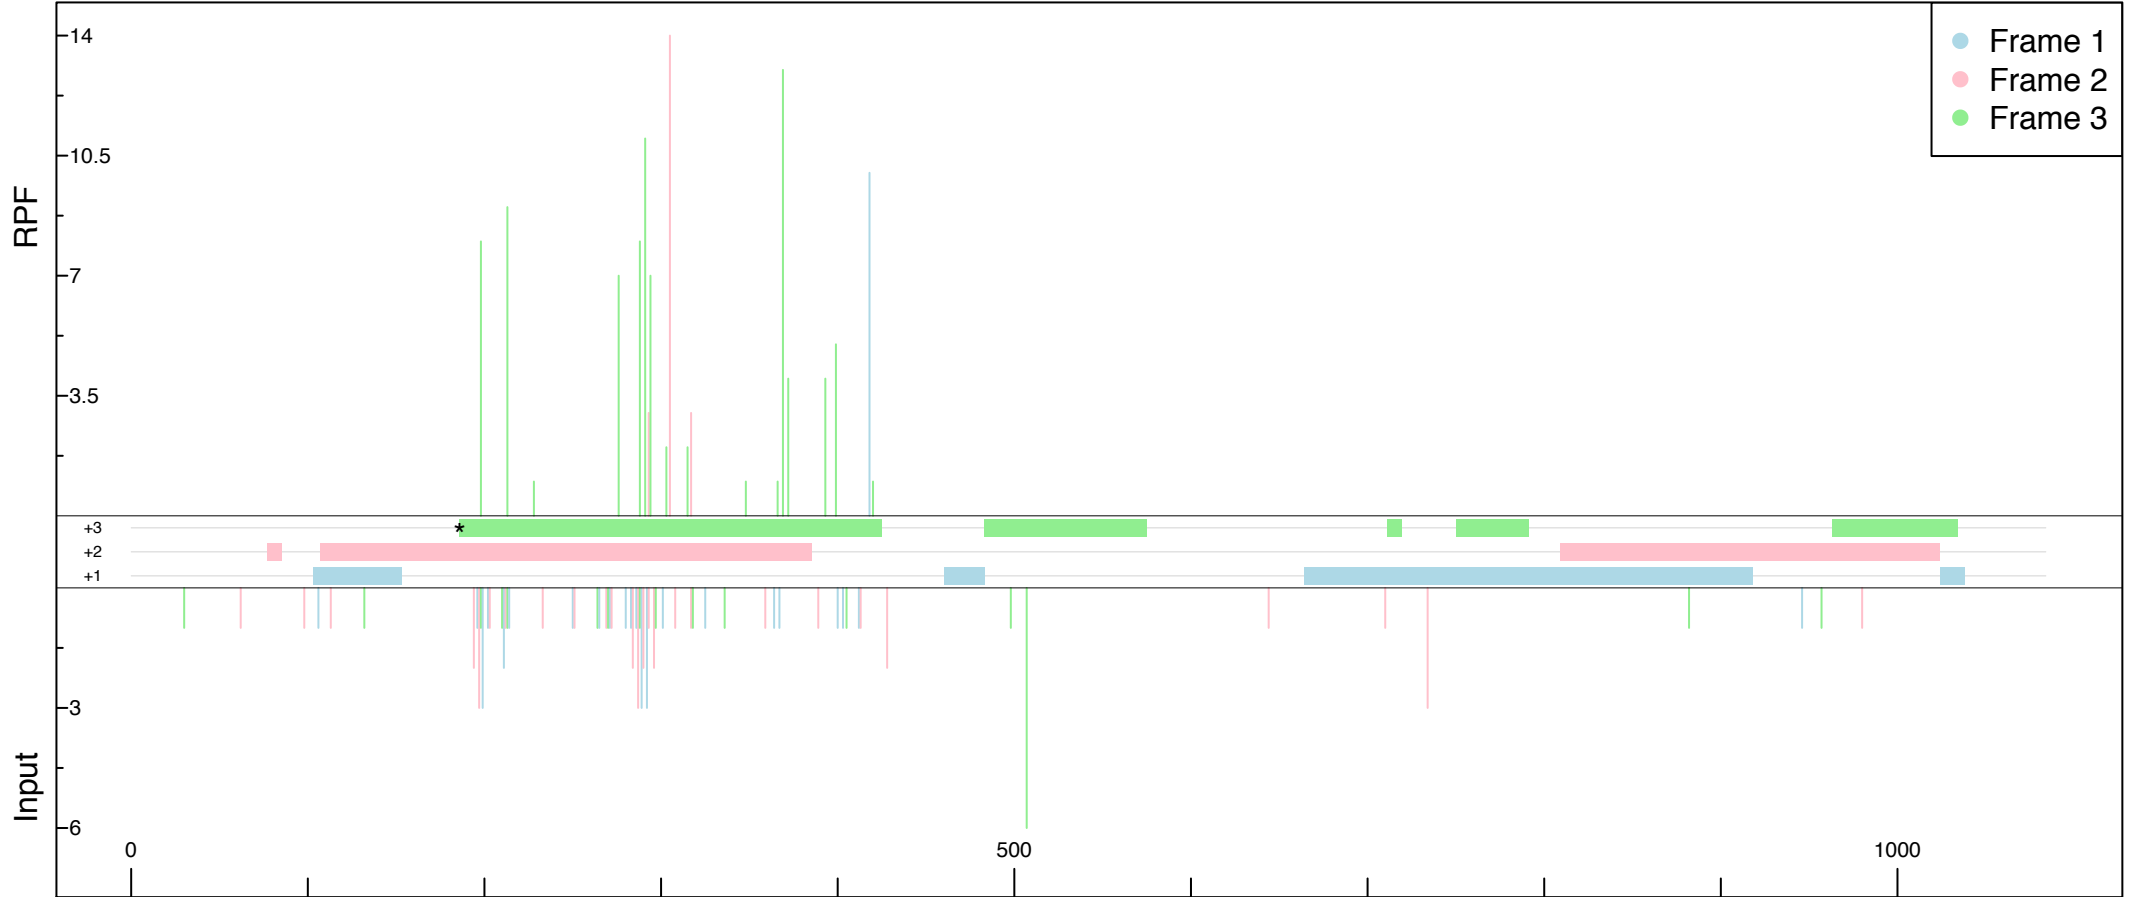

\*MRLMQEPMKKPRQKLTRLMQESMKKTGKELMRLMQEPMKKTGQELMRLMQEPIKSMQEPSTKGAEWFLRQTAFVLNC

# ENSDART00000140755, Global

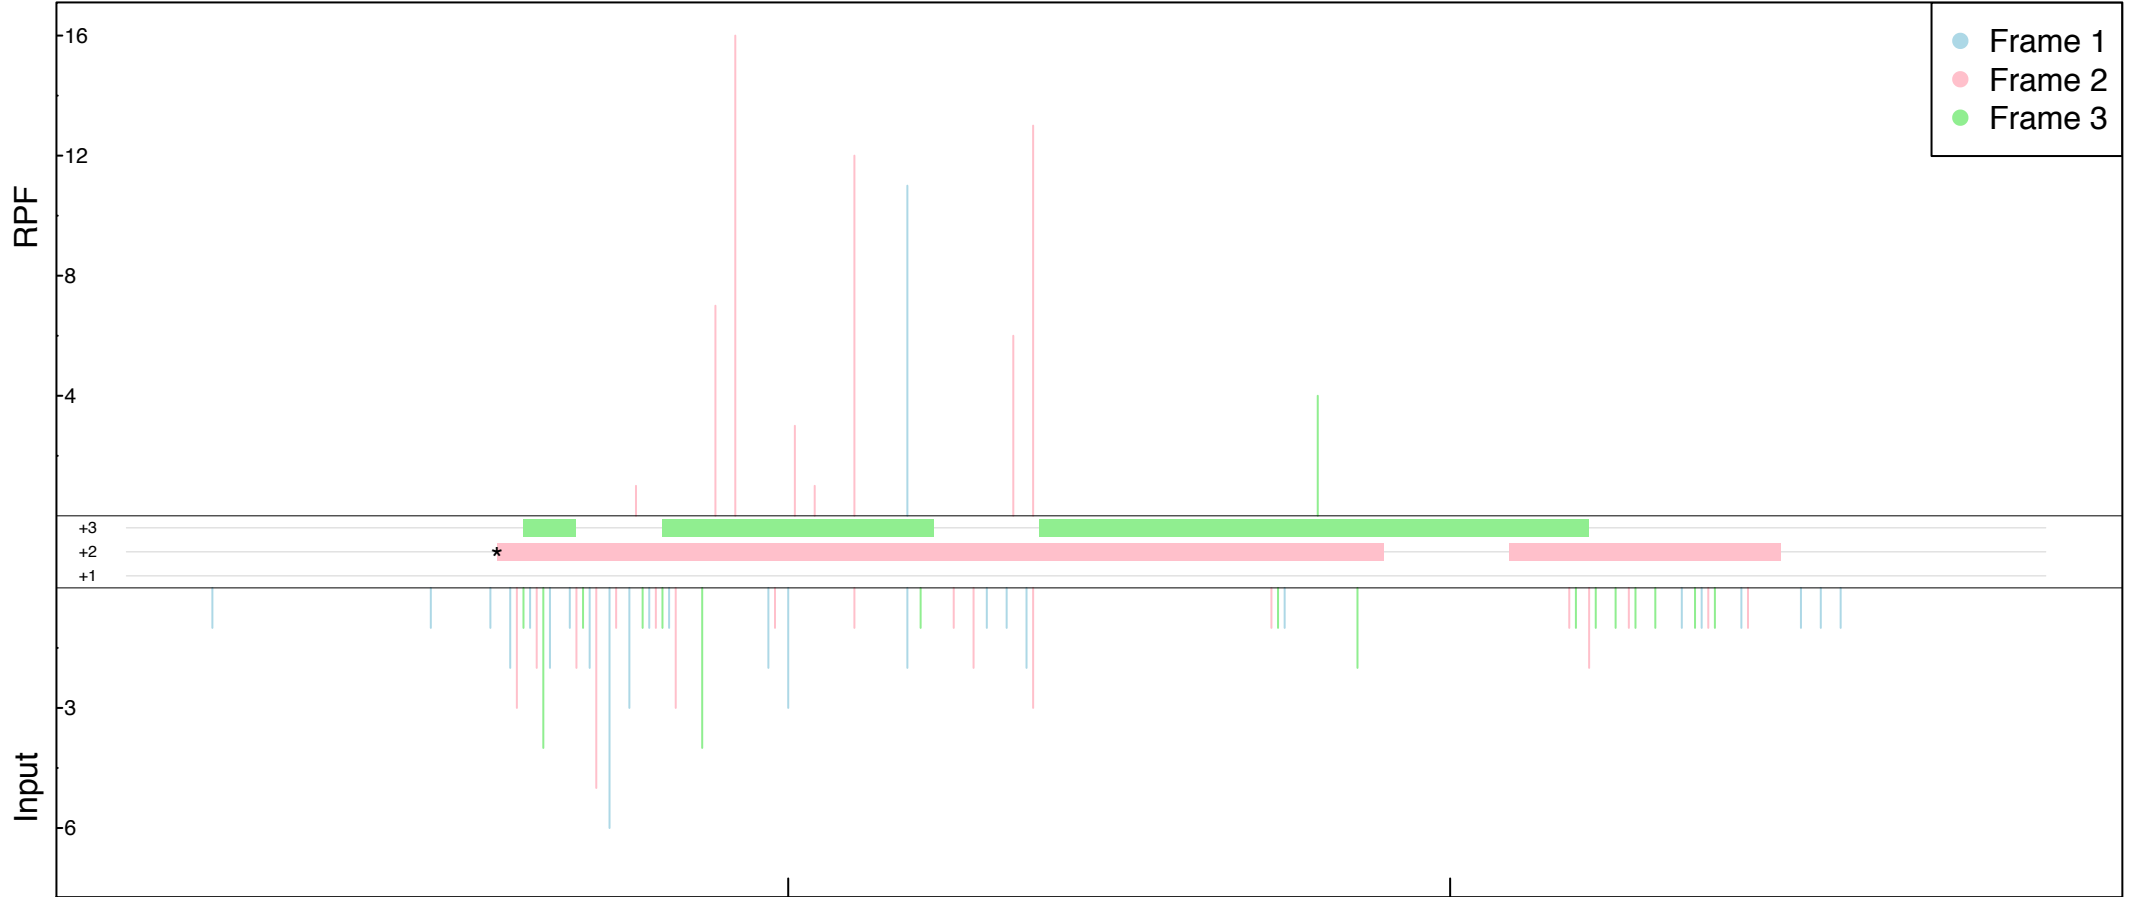

\*MDALMDDTDDKESAIHVPLGVLRWSLDDAEQVFLSGKDYHYRS

# ENSDART00000146816, Global

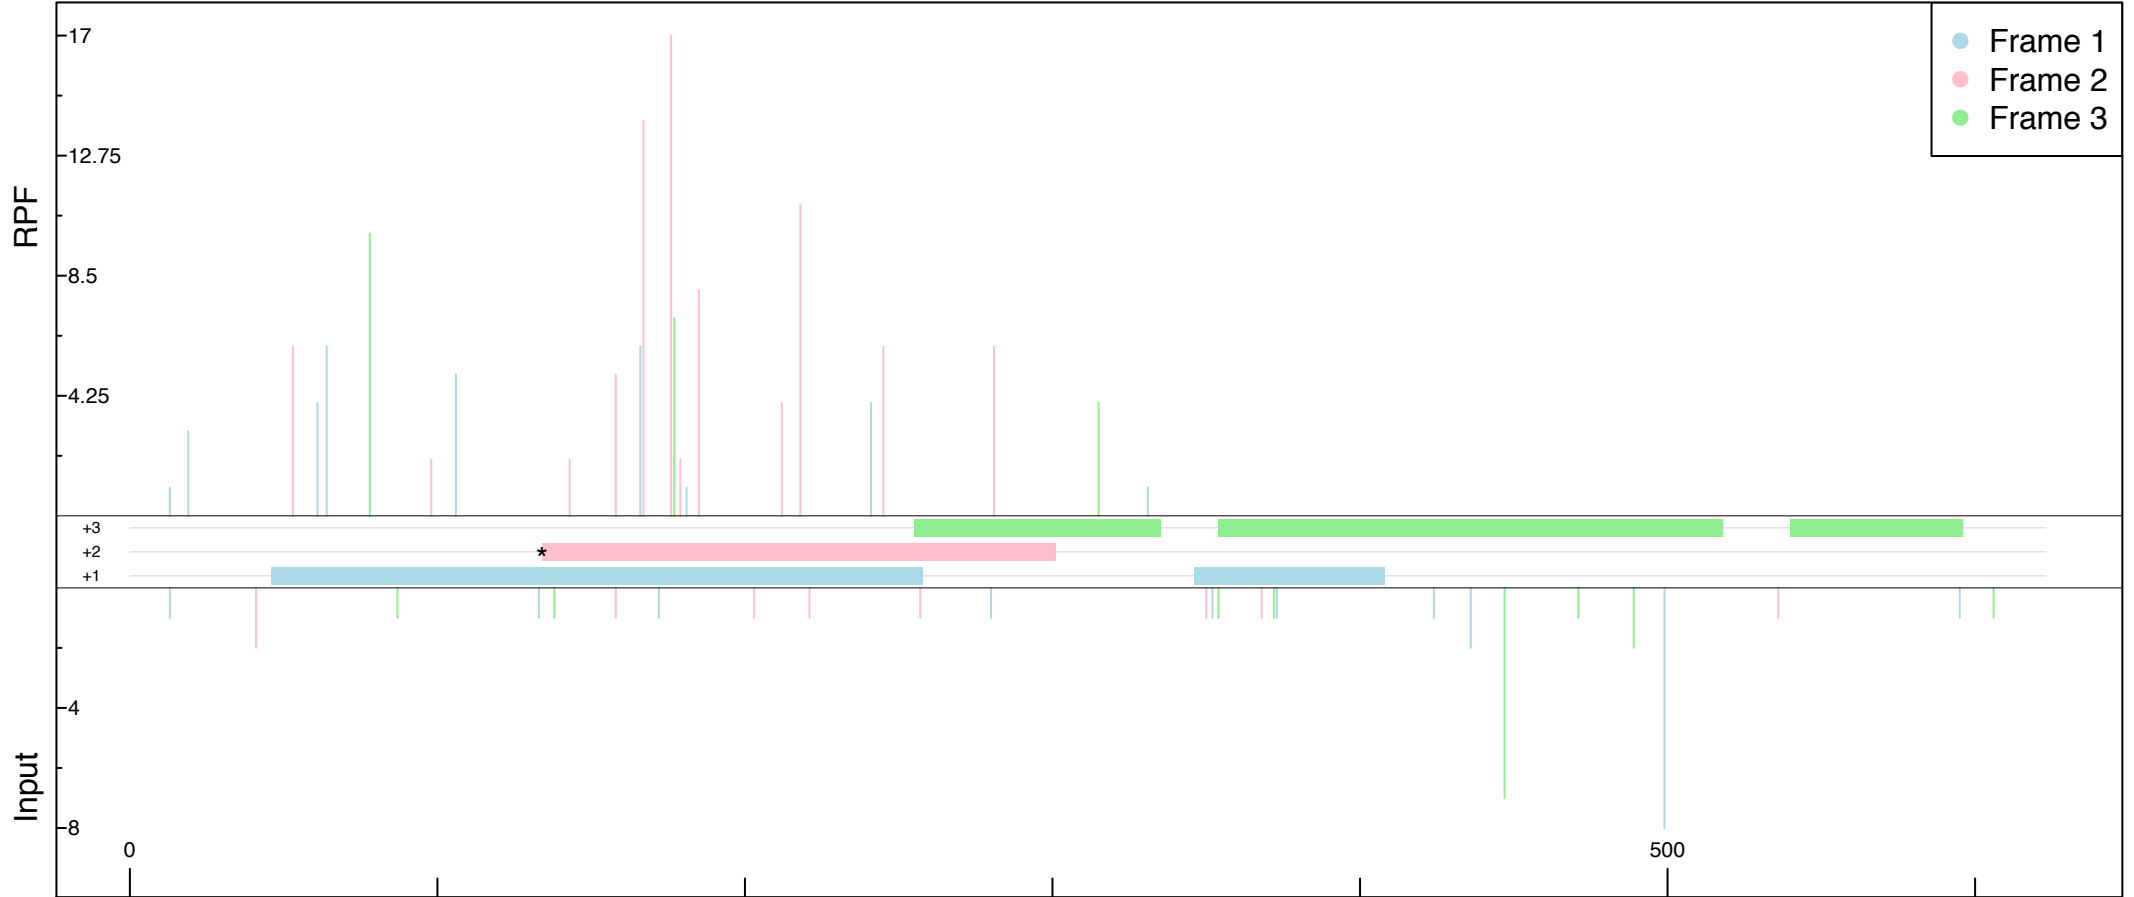

\*MFMFDQAWLVNNGCPKTCGAKMVCTLVKTVDKRGGTSMNNEPHIPTYSTSVRL

ENSDART00000143588, Global

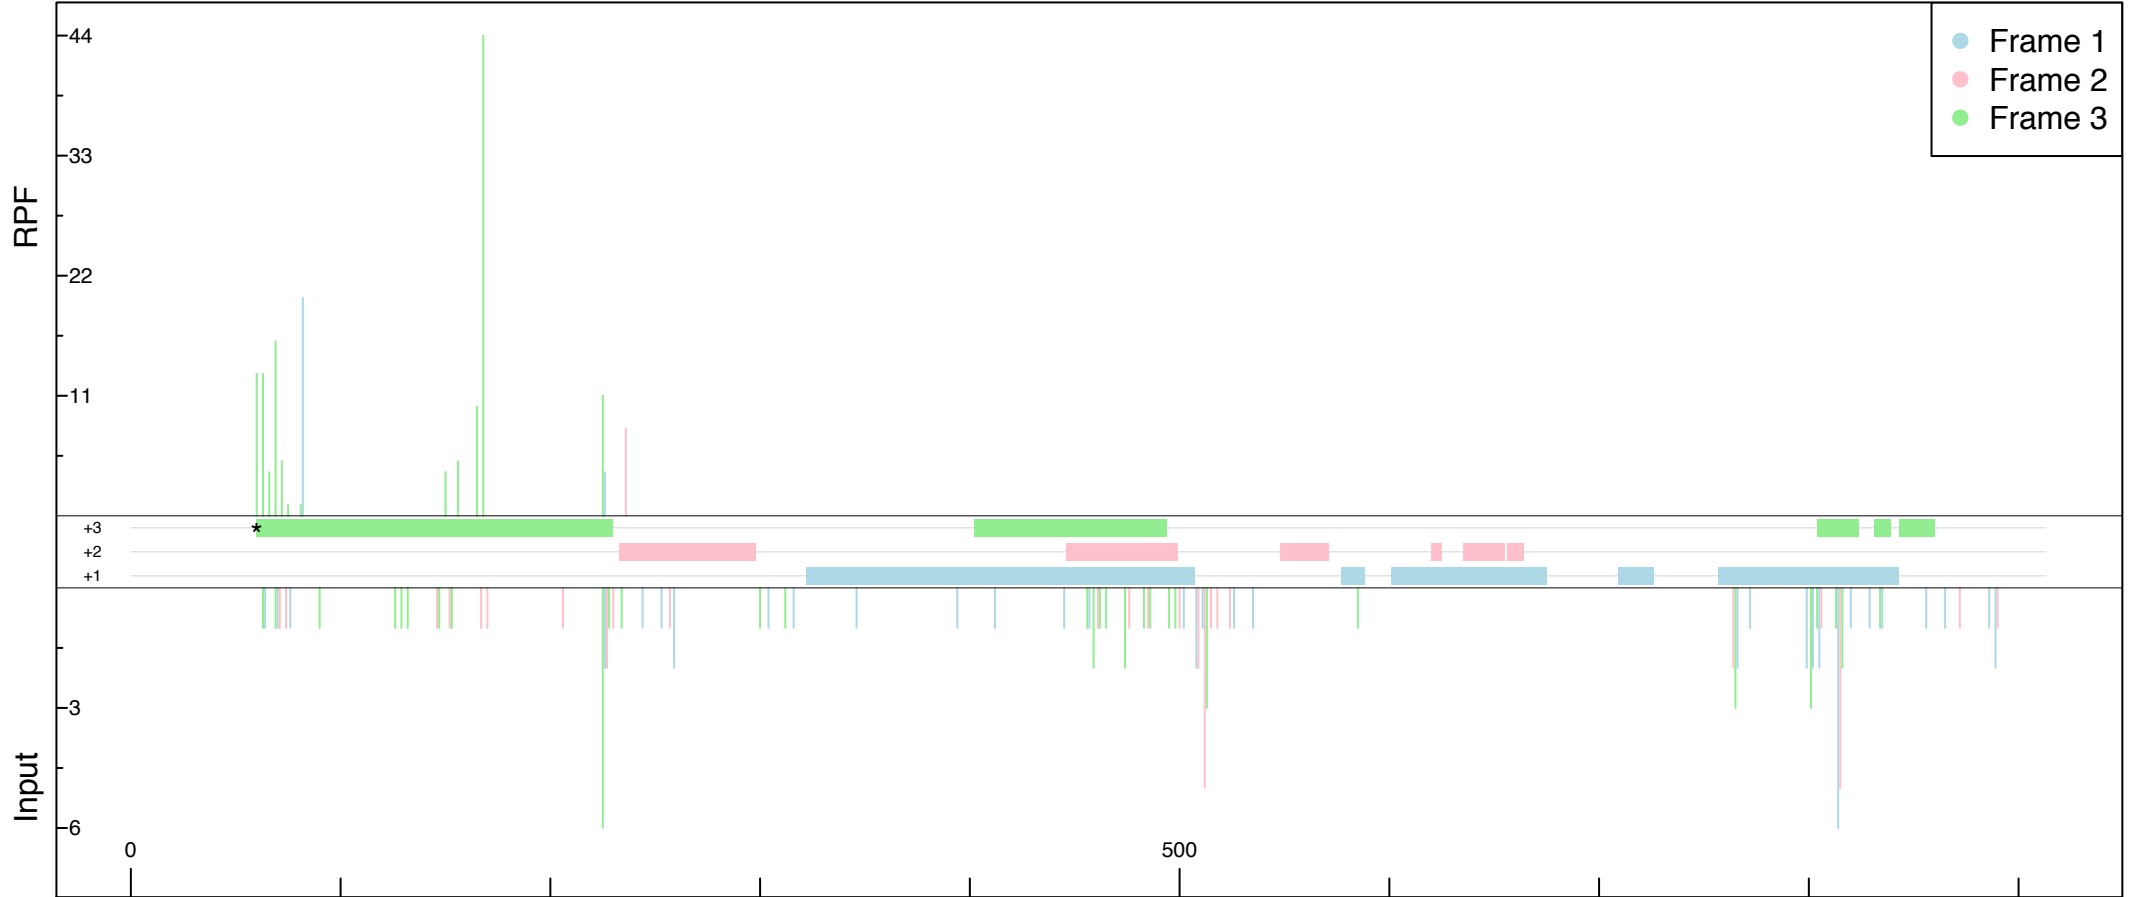

\*MKGANHRAGGNTDFGLSSTHSTTLFFLARLHSRIRKKPATRETVESLKDIFIRIC

ENSDART00000136260, Global

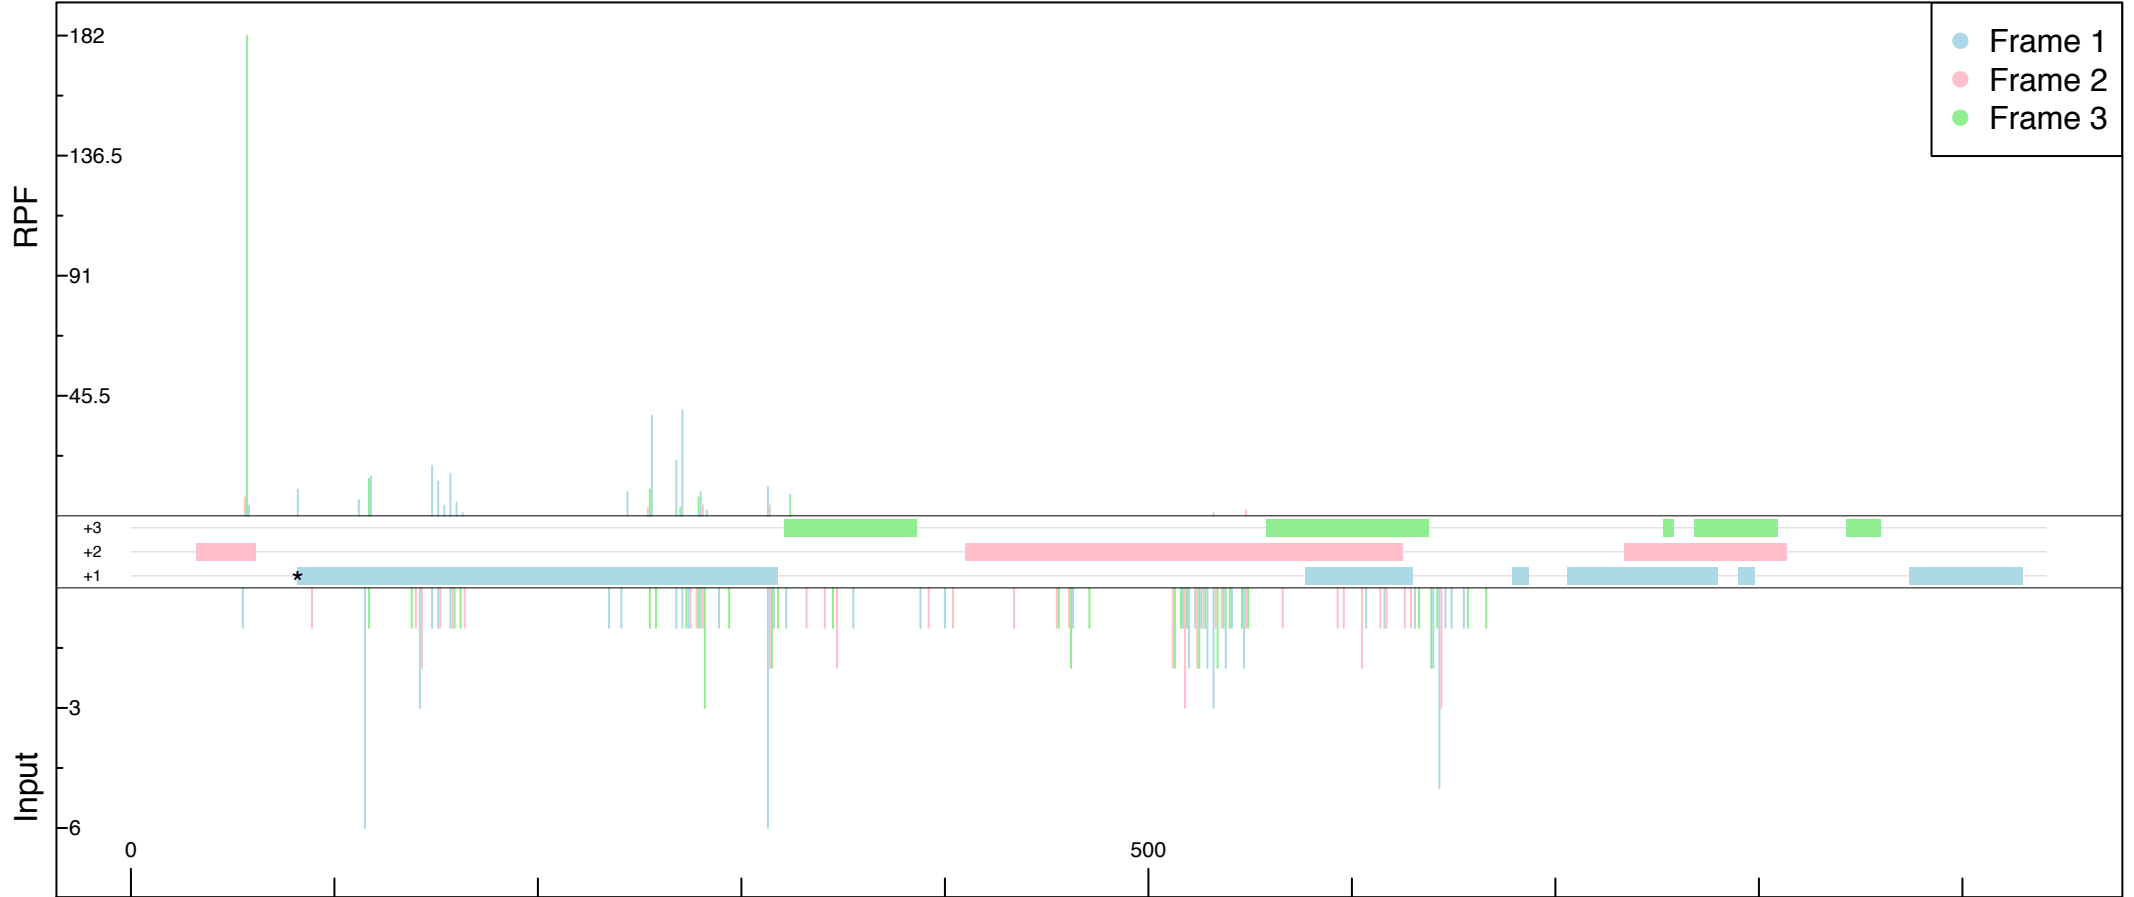

\*MRQFSLISGVTKLPLQQKRRRAKMKGANHRAGGNTYFGSSSTHSTTLFFIARLHLRIRKKPATRETAEGSLKDIFIRIC

ENSDART00000140094, Global

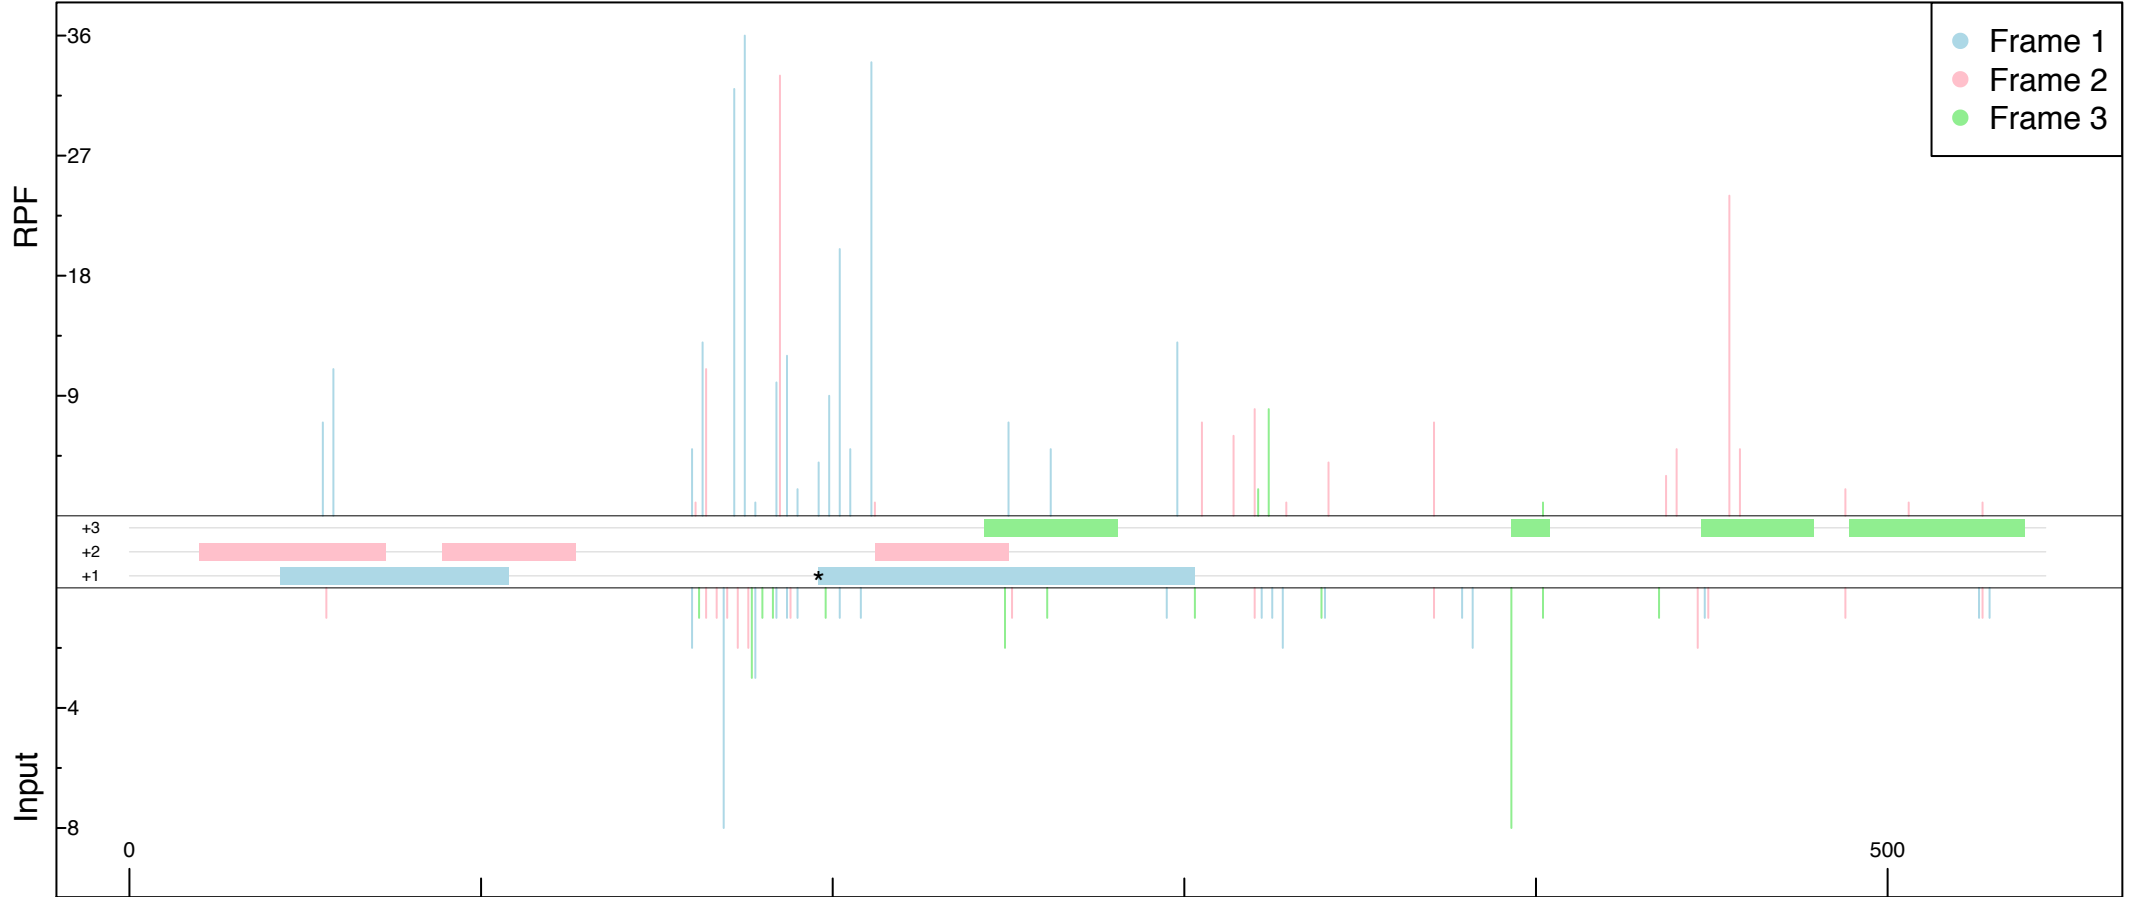

\*MLLDRNGHLKLADFGTCMKMDSTGMVRCEHCCWDT

# ENSDART00000149866, Global

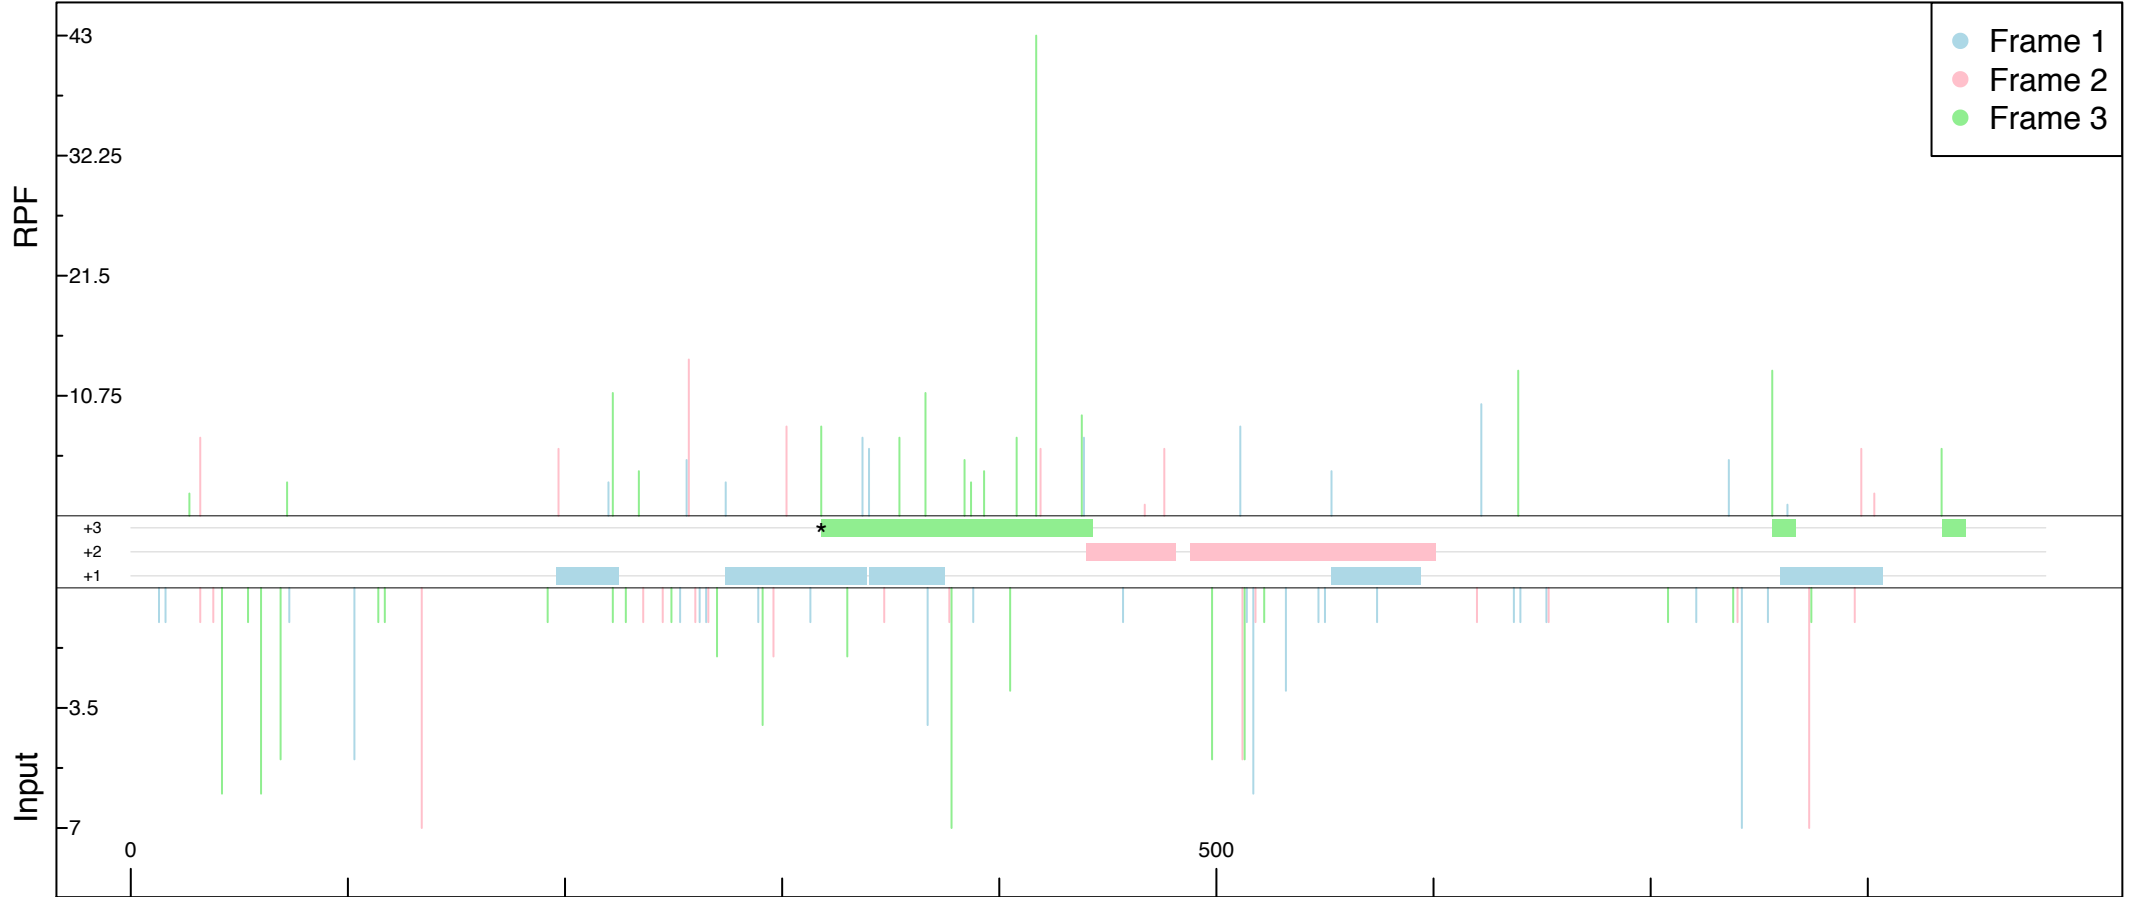

\*MGEDKPLNAAGRYLRSETLMKHESMTECPKSLHRKFEKKS



# ENSDART00000140958, Global

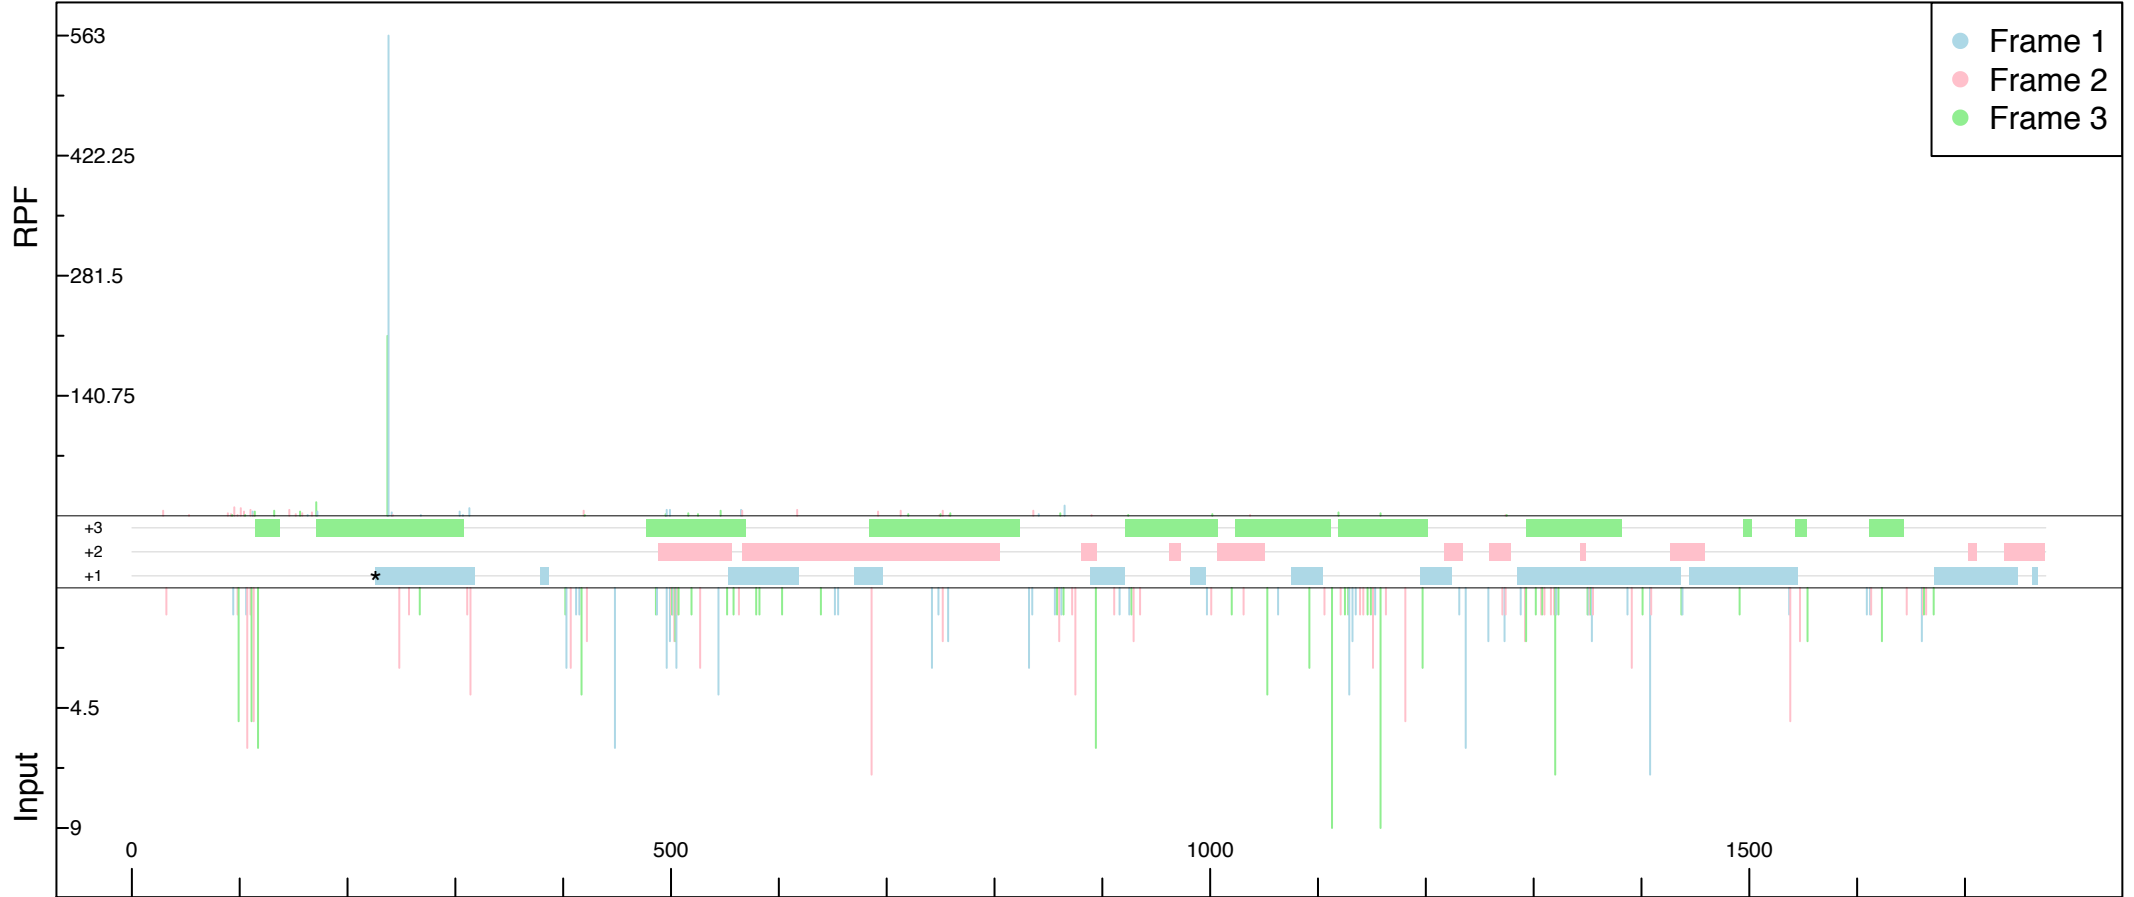

\*MVNLTECIHQPSPTKSELQGQLVLKVPELD

# ENSDART00000139412, Global

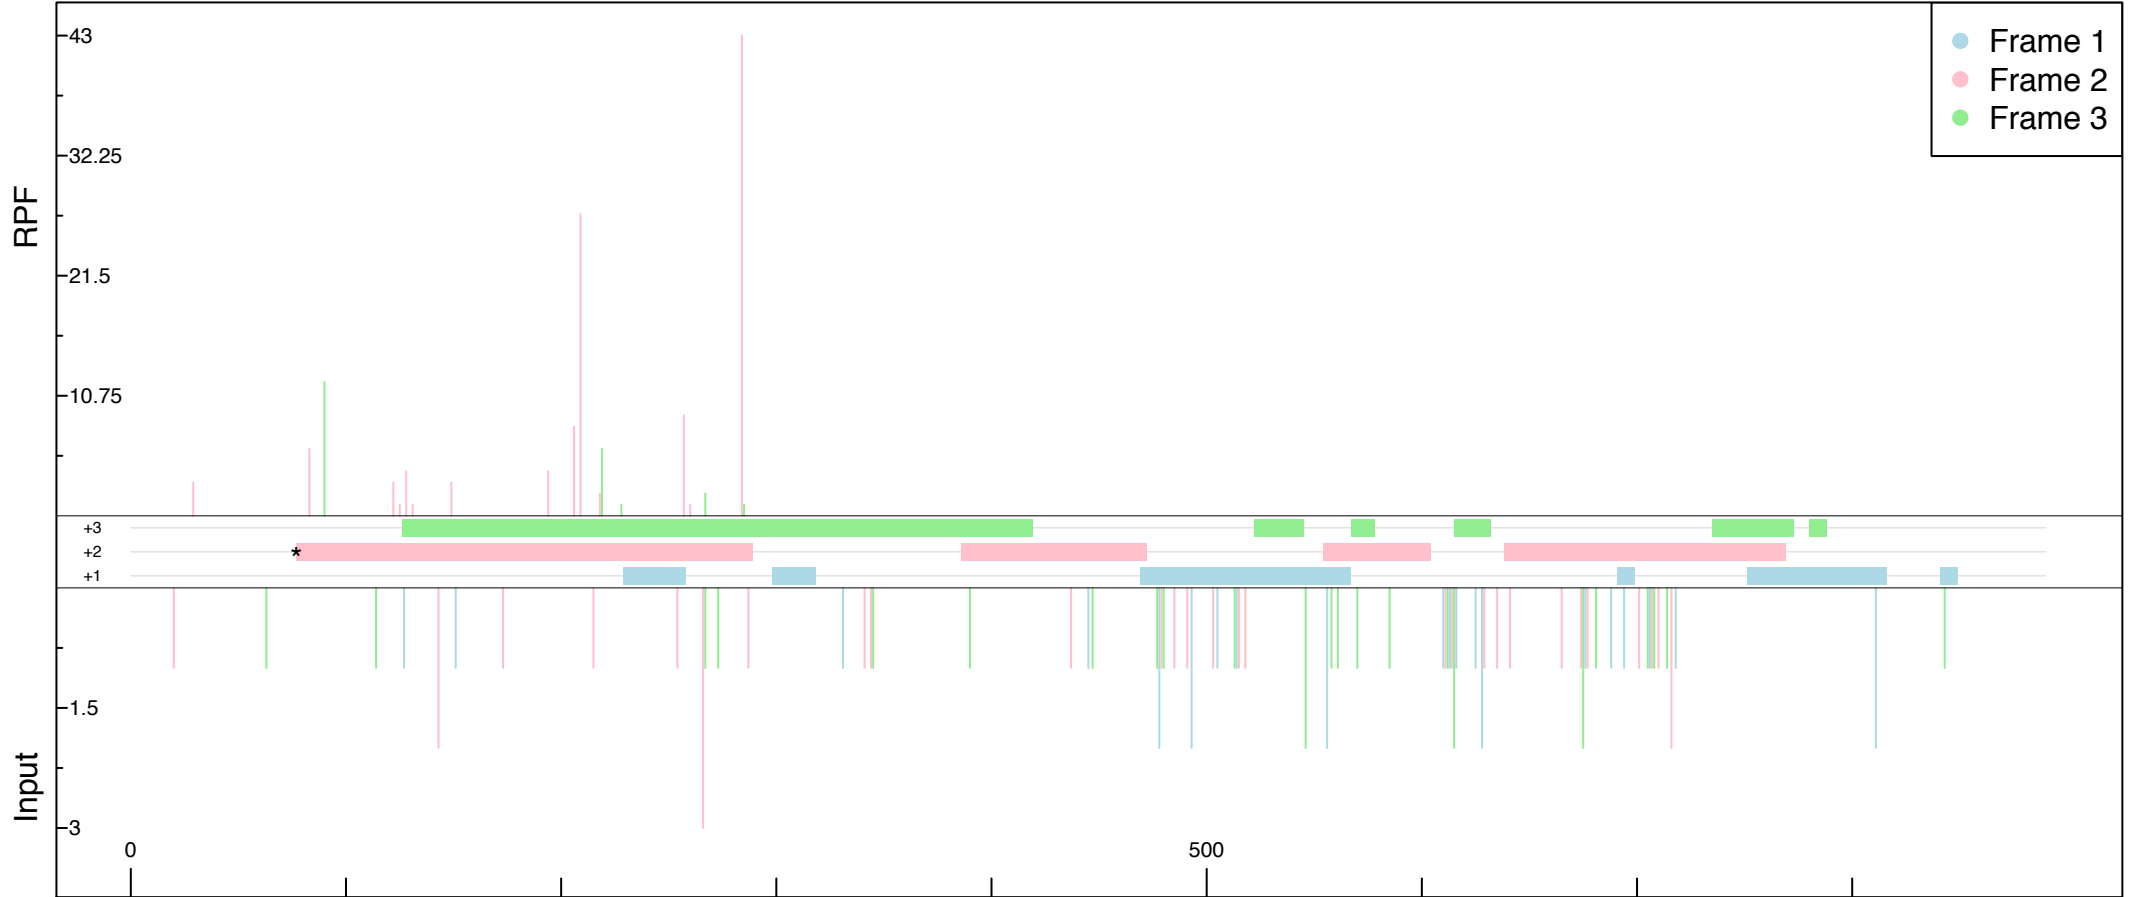

\*MNMSSSSALMQQIYPFHDGWNVACFIILLFILTILSLATLAFLYELLDCGCFNKTKTVRDLRRQHDEVV

Zv9\_00050727, Global

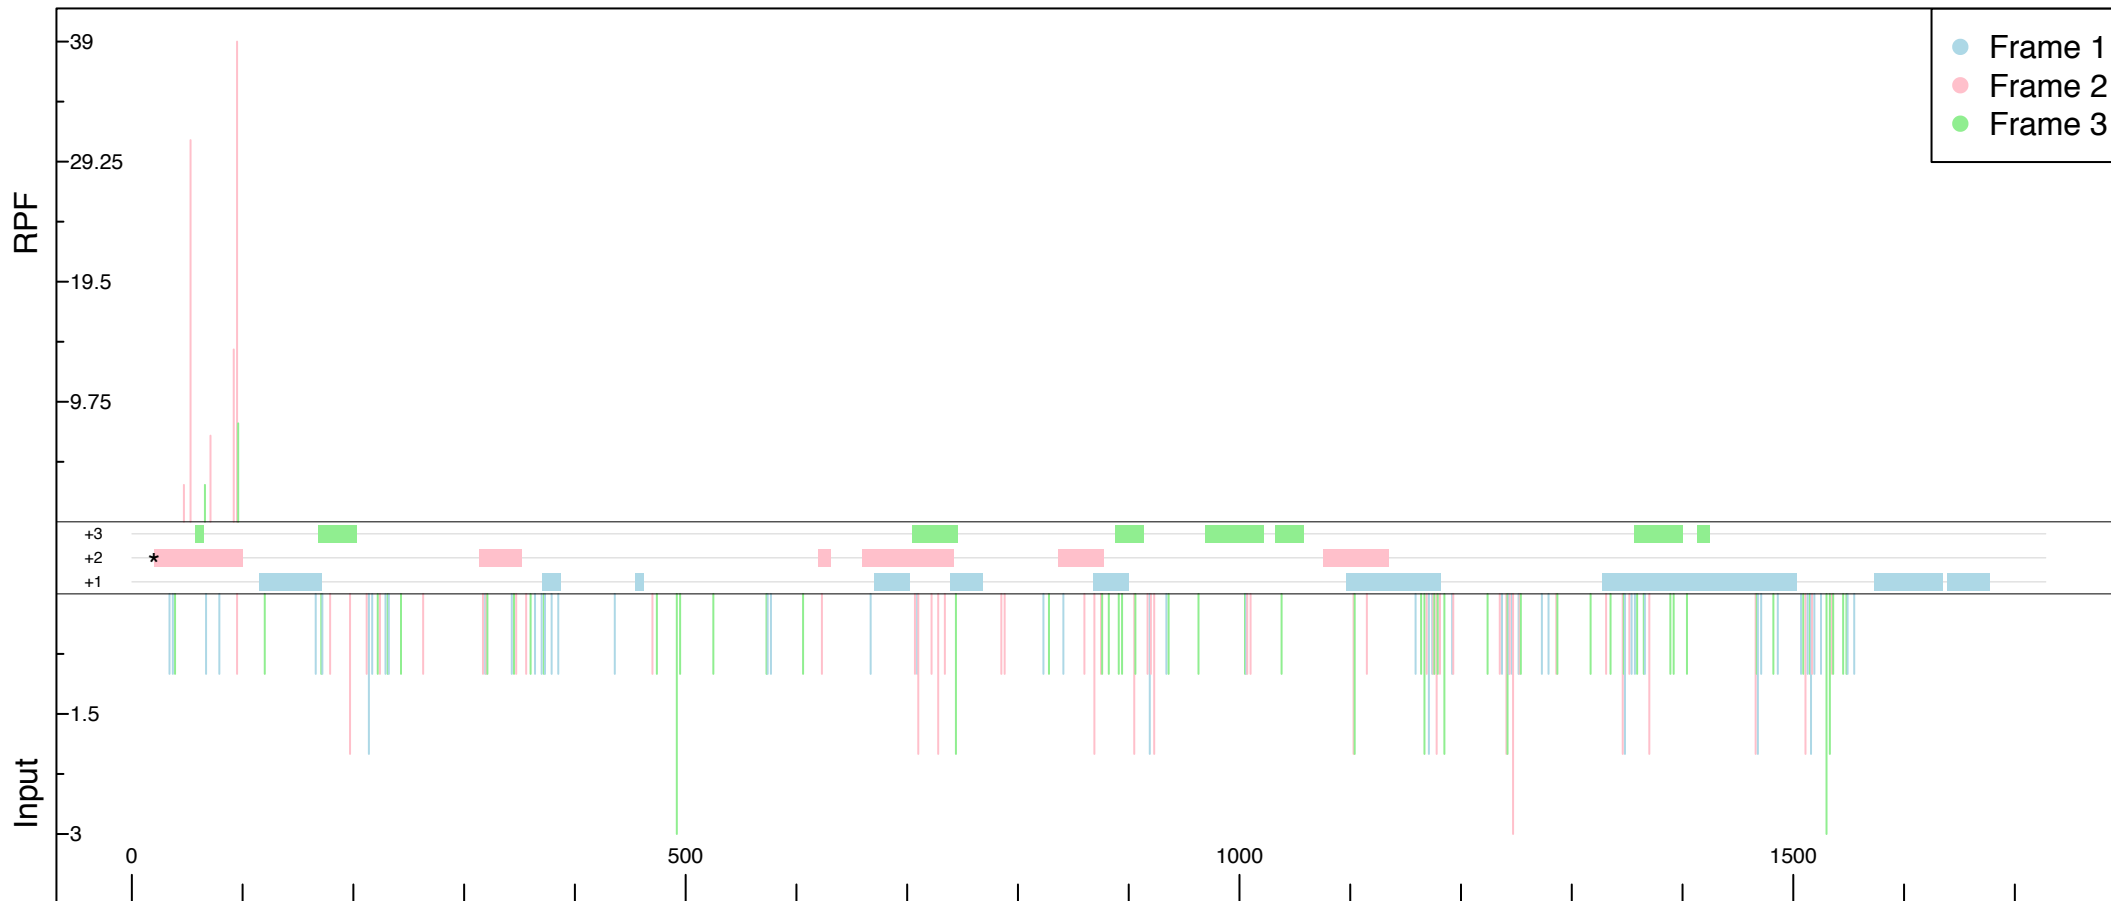

\*MVEPASPNPQNEDGVETDKMLVRKPN

Zv9\_00054504, Global

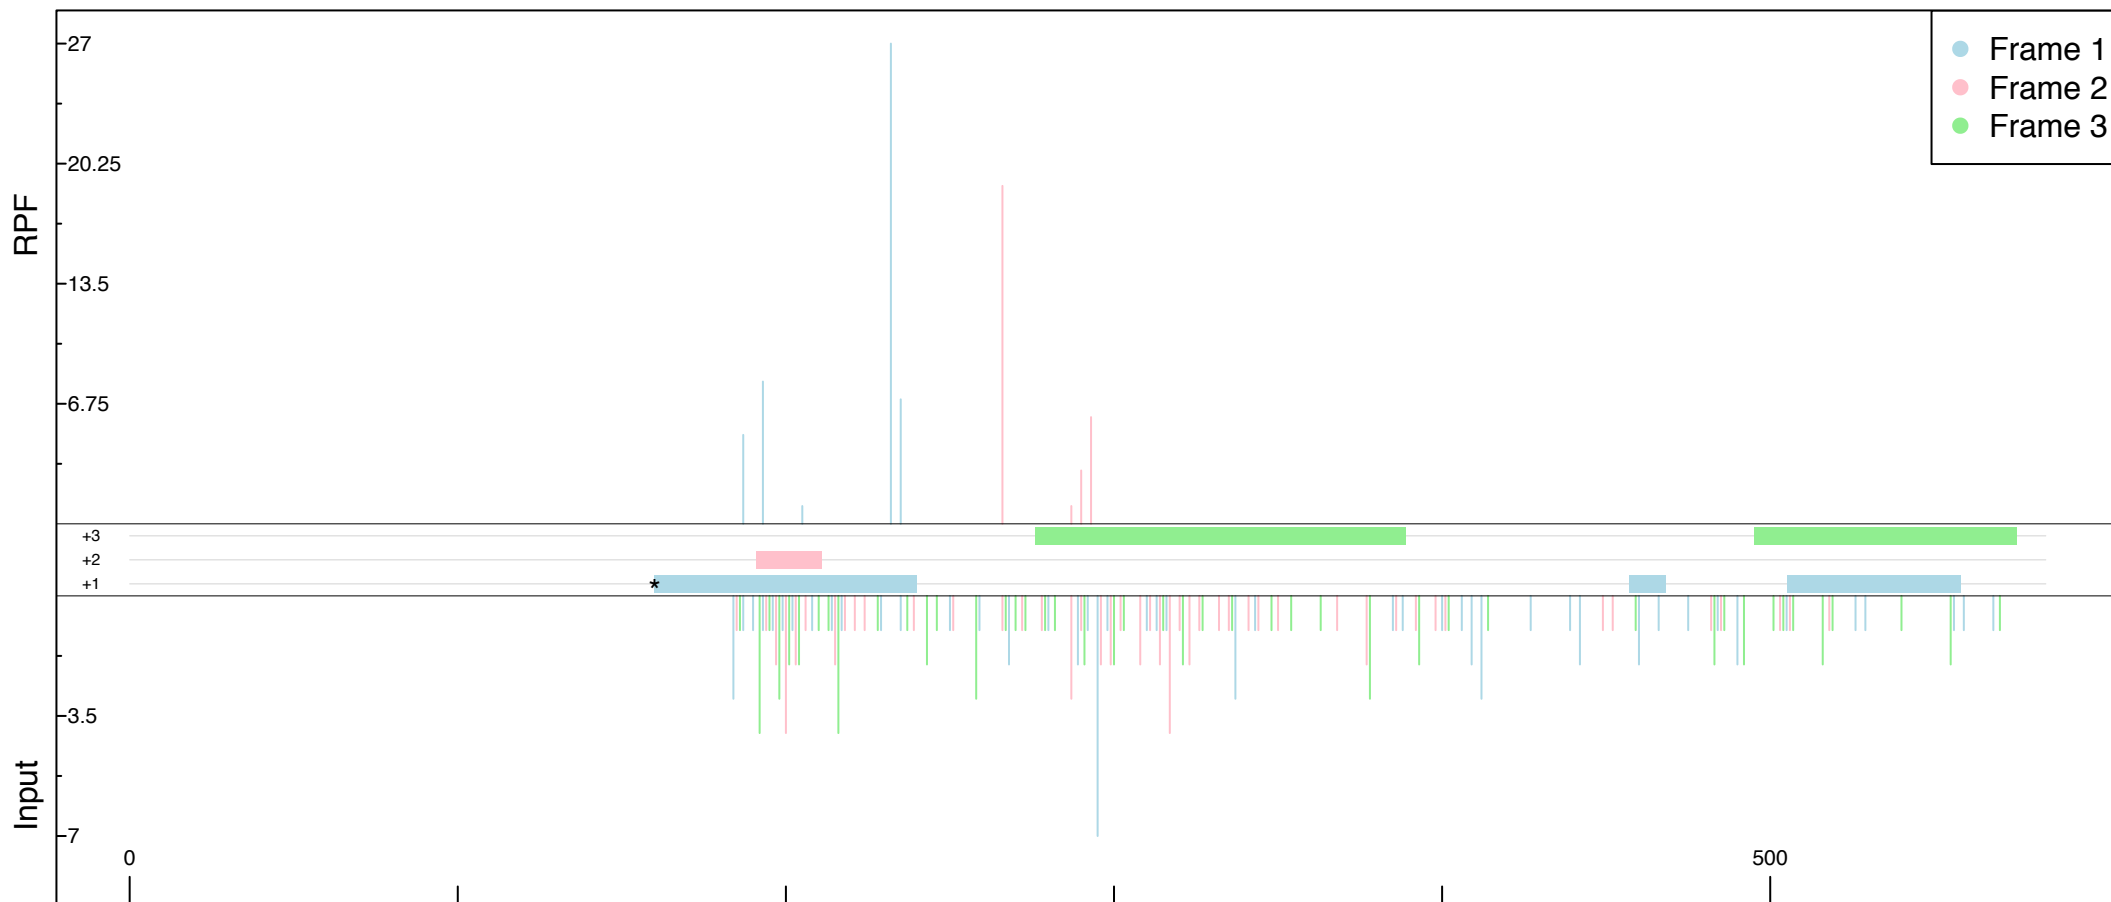

\*MTAMVCGQMIEAQKTVEEQEKQKSS

ENSDART00000131551, Global

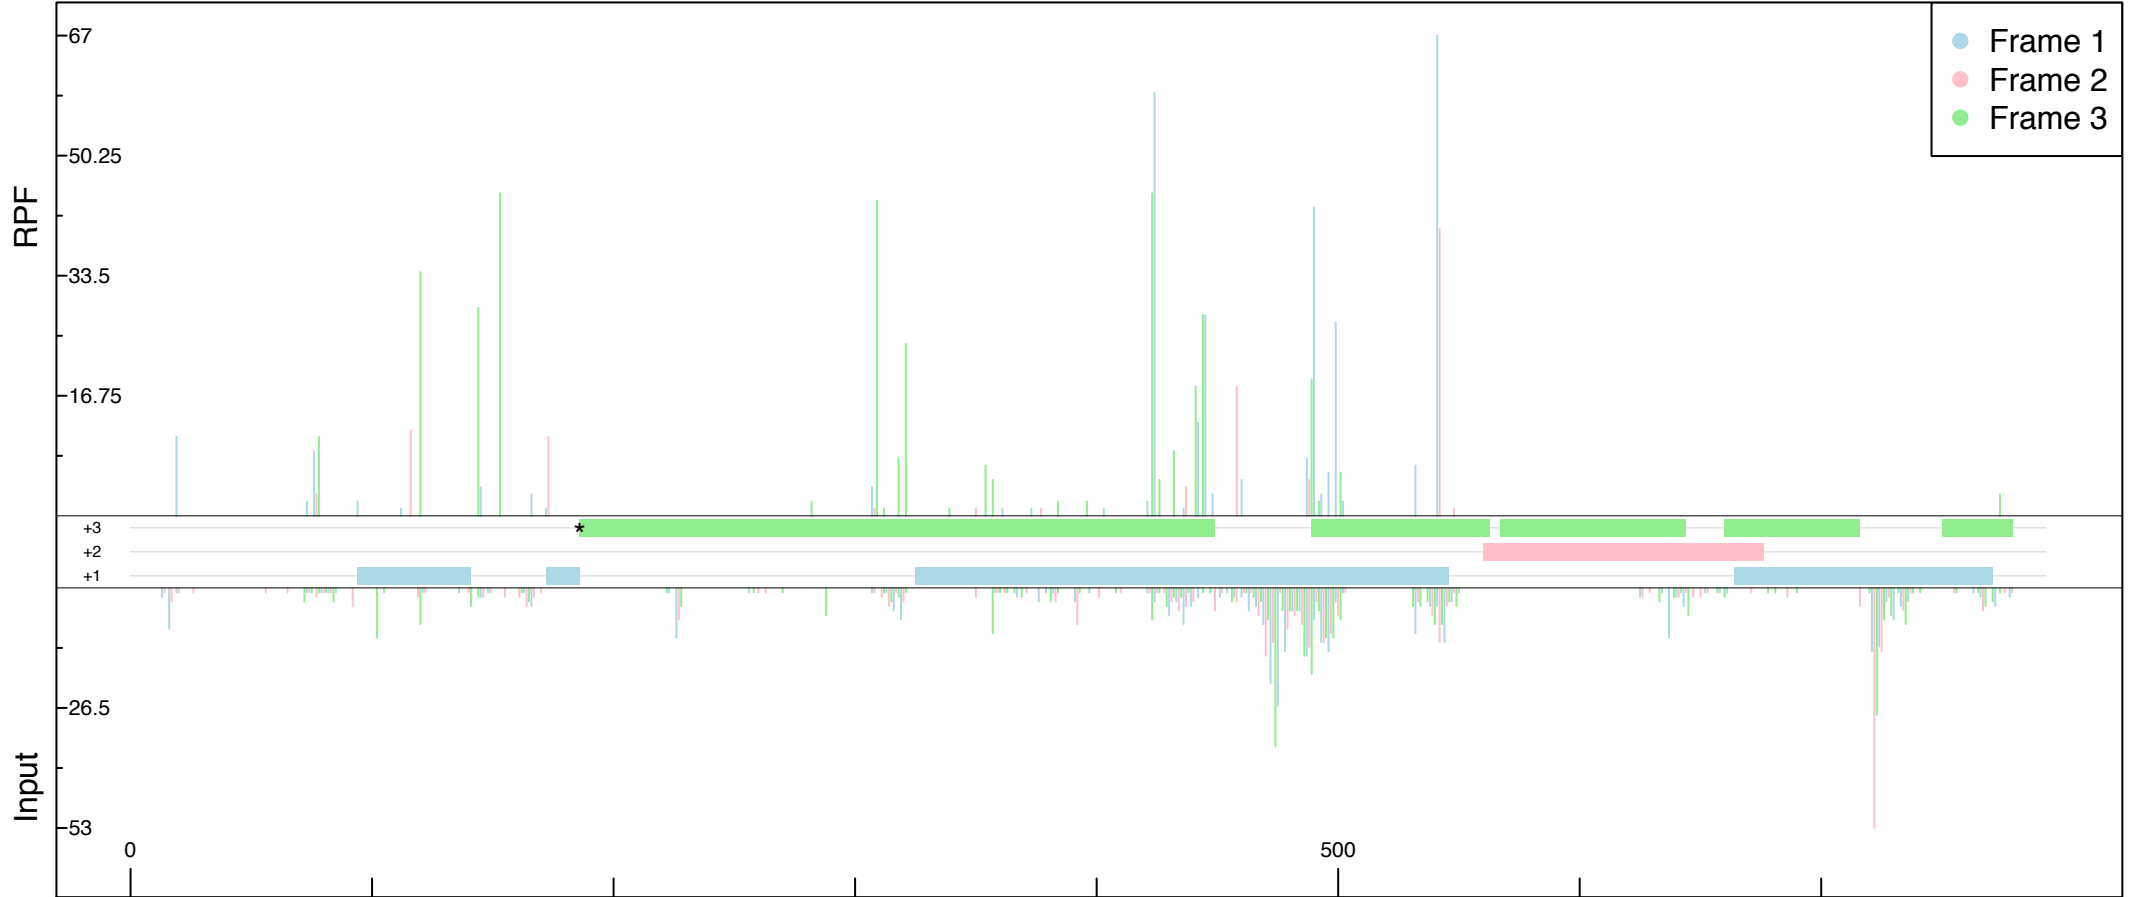

\*MPITLLIIEKVPVLPVVSYSLEGRVVIGPHLDLTTDFGSLKLYAEDVFCTLEFKGCVADSICLSVLETRGKAVFKRMGLLYHM

ENSDART00000135054, Global

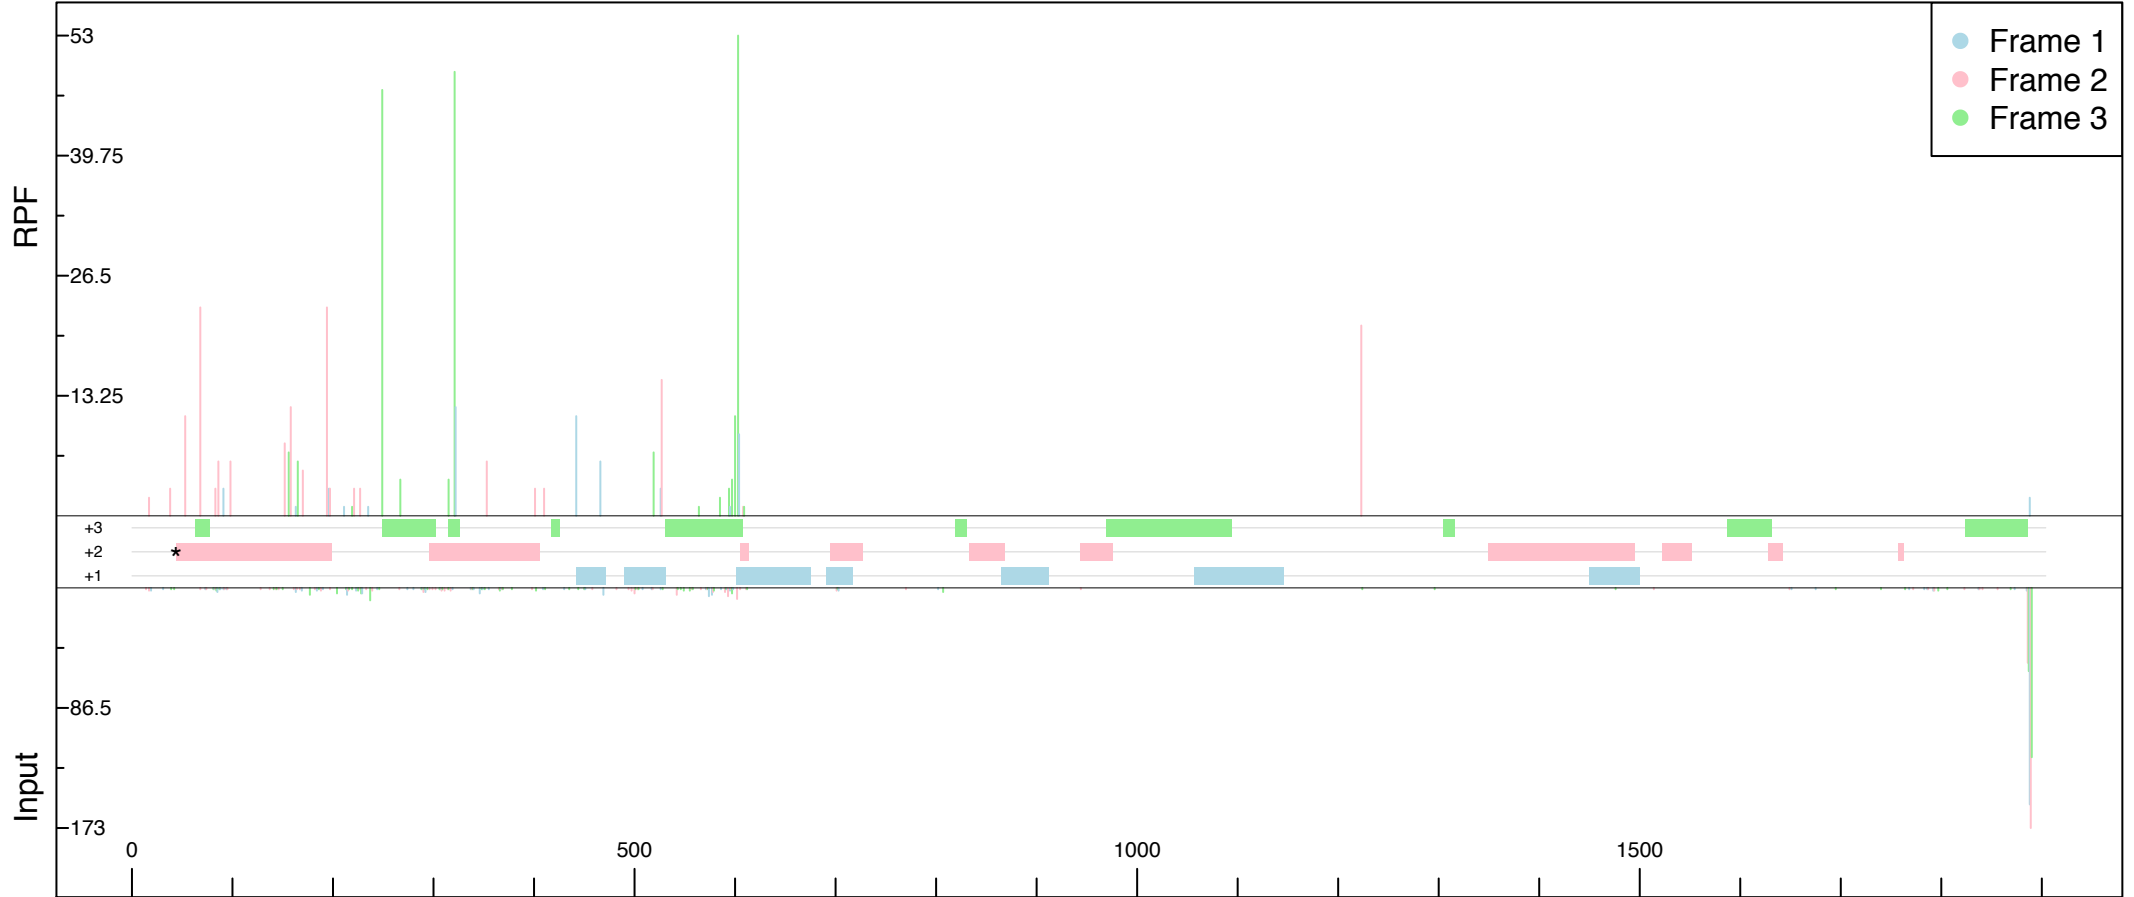

\*MQKLLTYEFILTKELFTALHLNSHNLTELHNCPTQISVEAGTSSCVQQRQS

linc-card8\_(1\_of\_2), Global

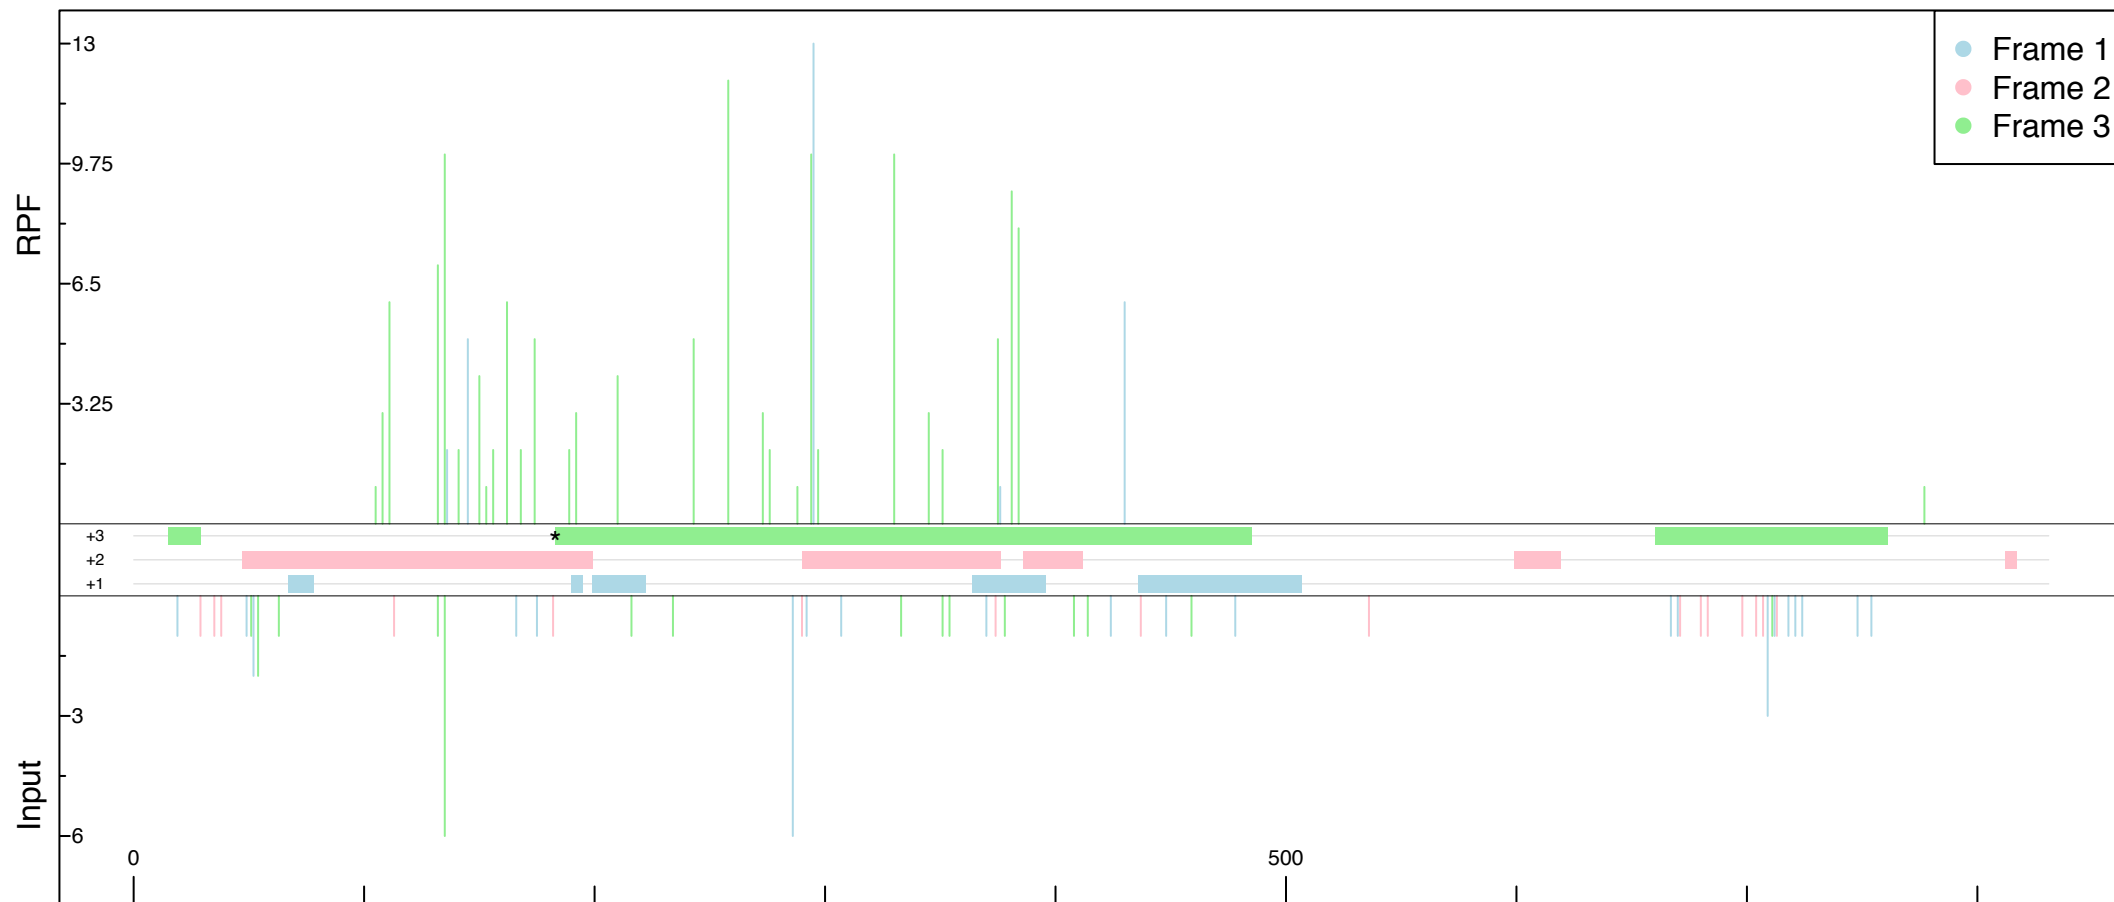

\*MEDVIDVAHRLGLRRSDGAPRNIVMRFTMRTYRDIVWRAAKESRYLAENRIRIKEALIKQDVDARAKLWPLVKKAREEGKKVSWNGPYAFVAGKKLELIP

# ENSDART00000079913, Global

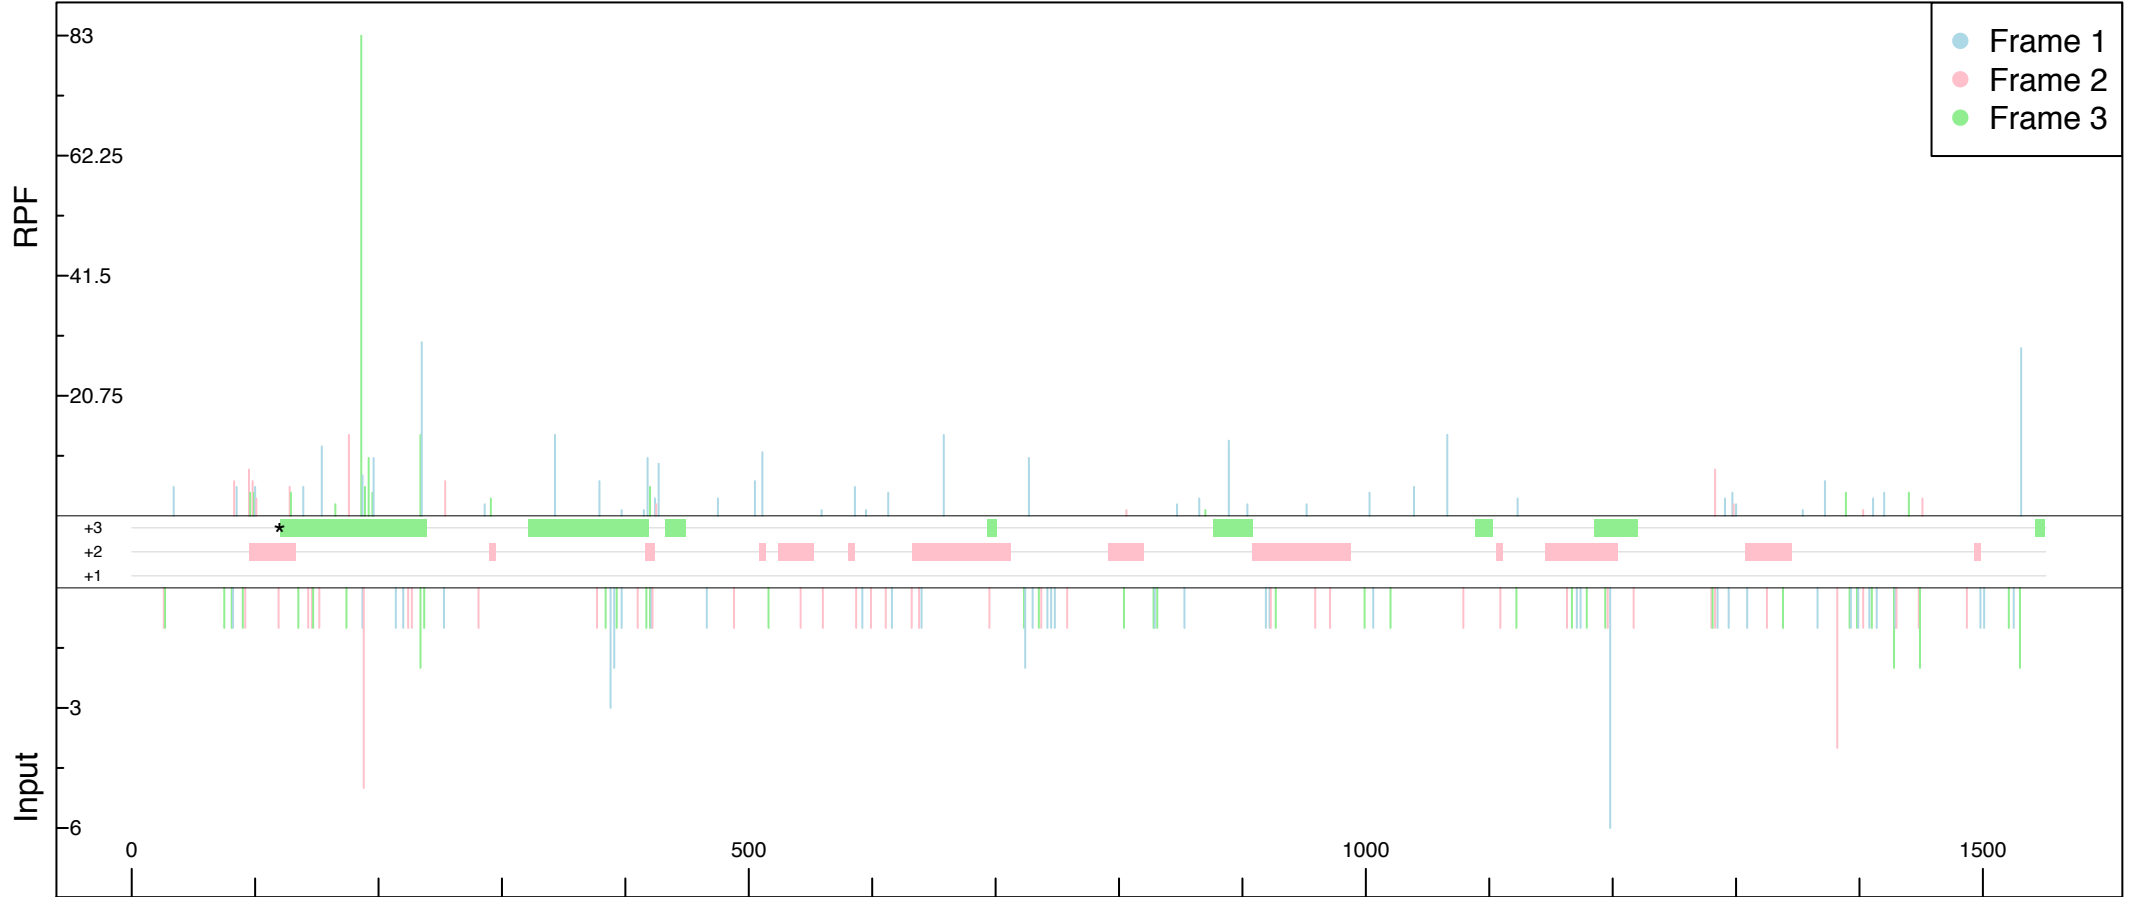

\*MRFADSI EANPSSKSPCCLEV KMPDTRNKQLTTTFHSLA



# linc-ppp1r11, Global

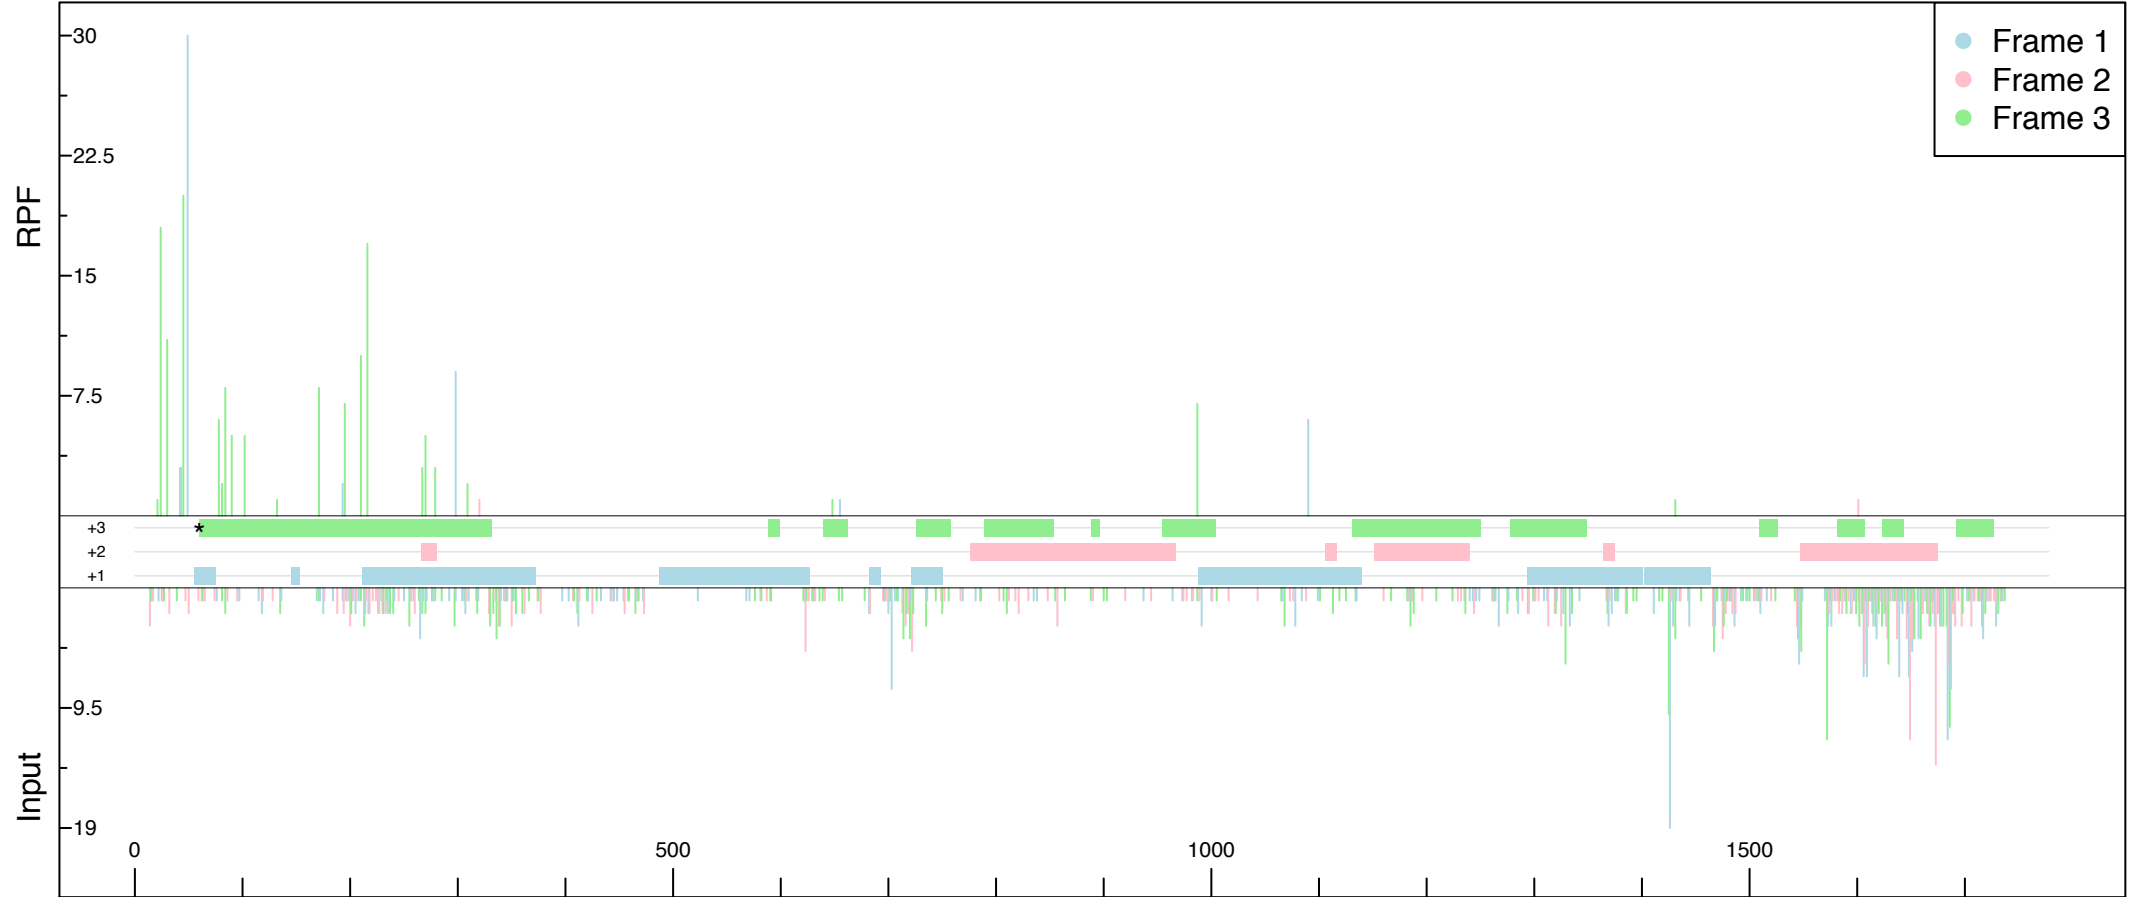

\*MAMFIVSAVGMAGLLWVVQYLLPFALIYGIIQAMVISVSVRQSEALAE GDDGKGDEEVTEGEEEQADIWEQNEPQQTADESNKGVKKRS

ENSDART00000132102, Global

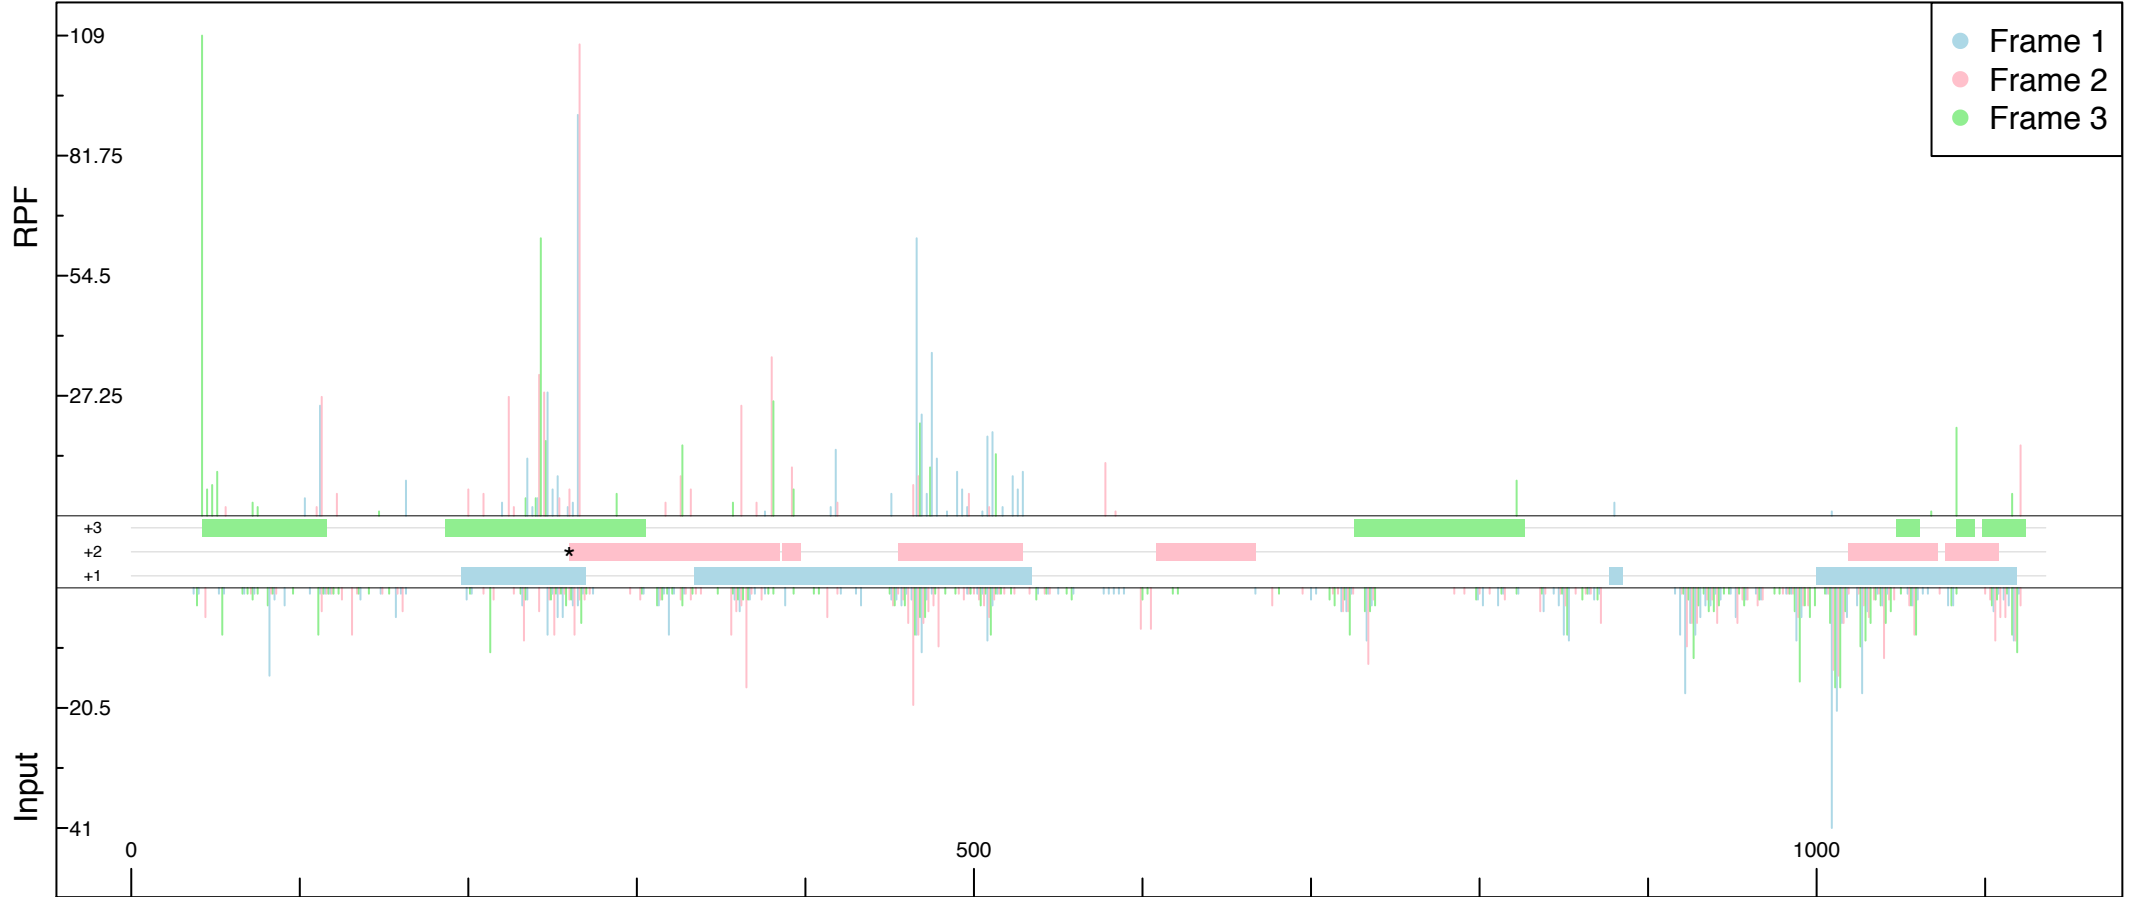

\*MPGERIHGQPKEEFLKDLTNTAMAICVIKRKEEIMRTLASL

# ENSDART00000134731, Global

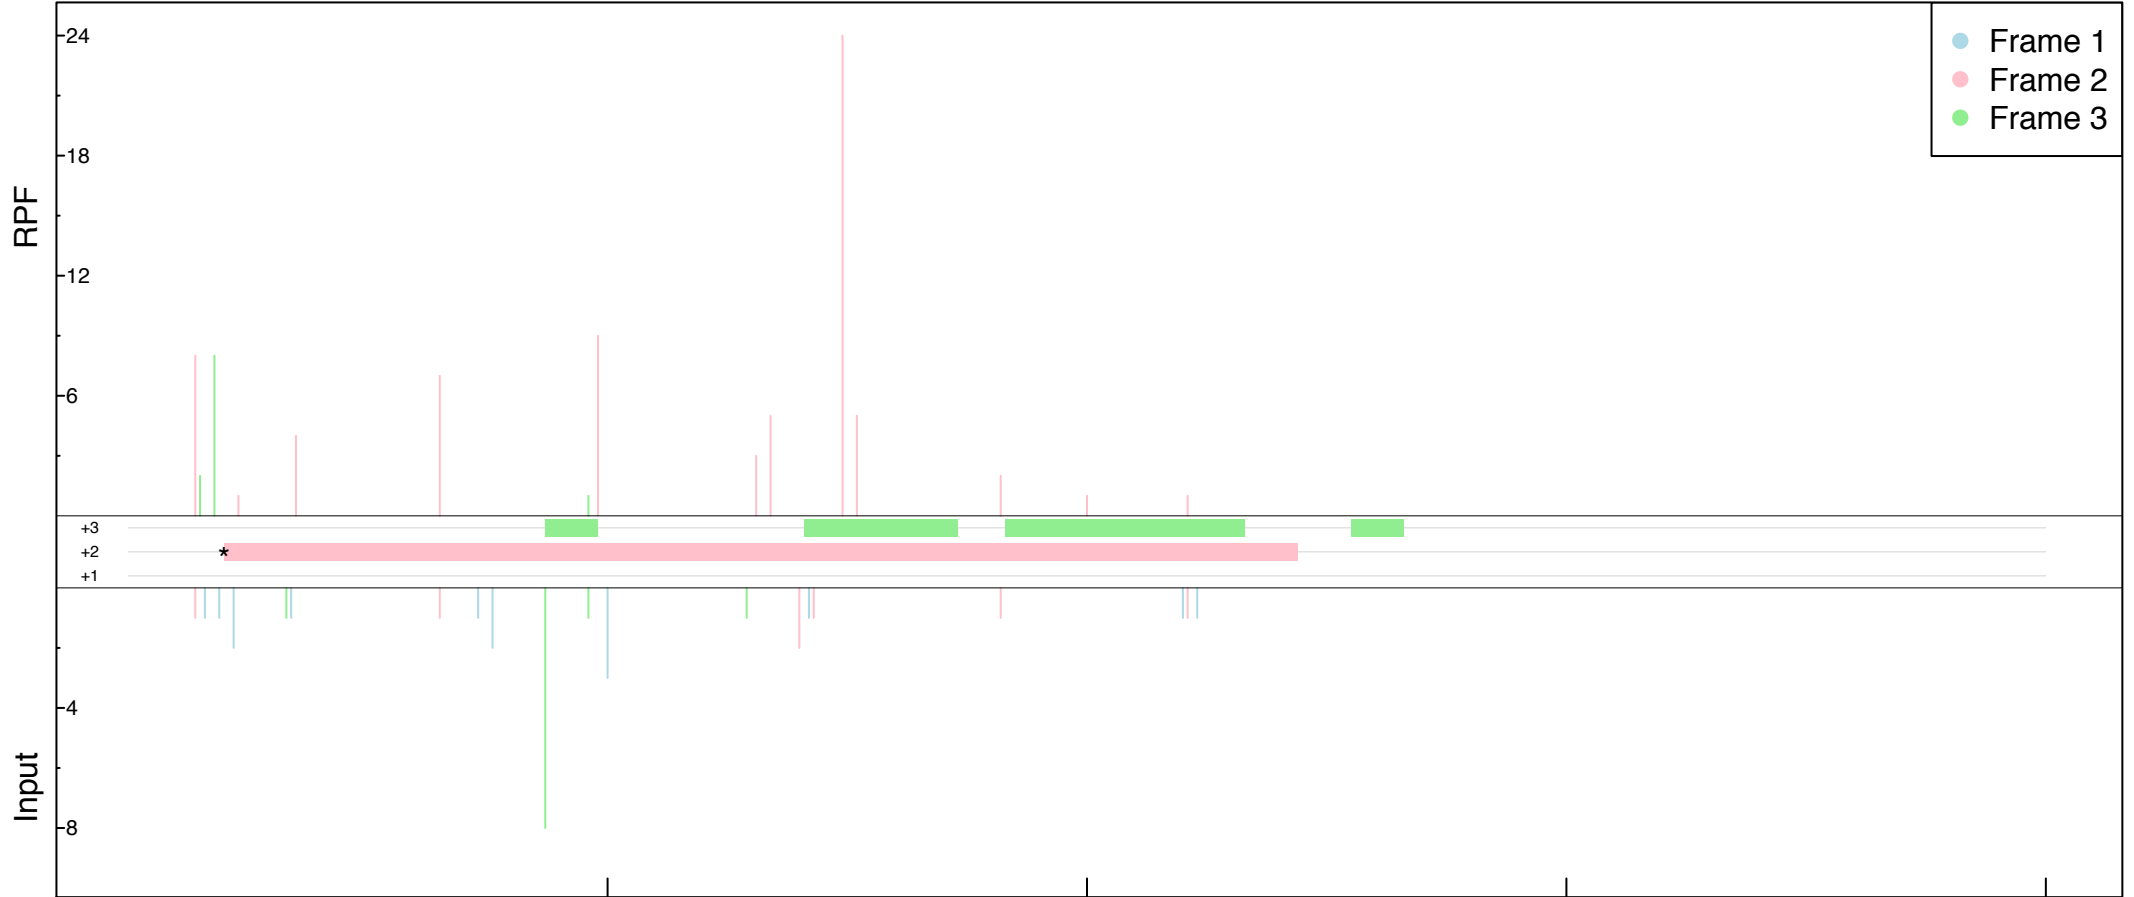

\*MSQGGTGYGREGDWWSVGVFIYELLVGDTPFHSESLVGTYGKIMDHKNILTFPDDIEMSKDGGKDLICAFLLSSK

ENSDART00000133257, Global

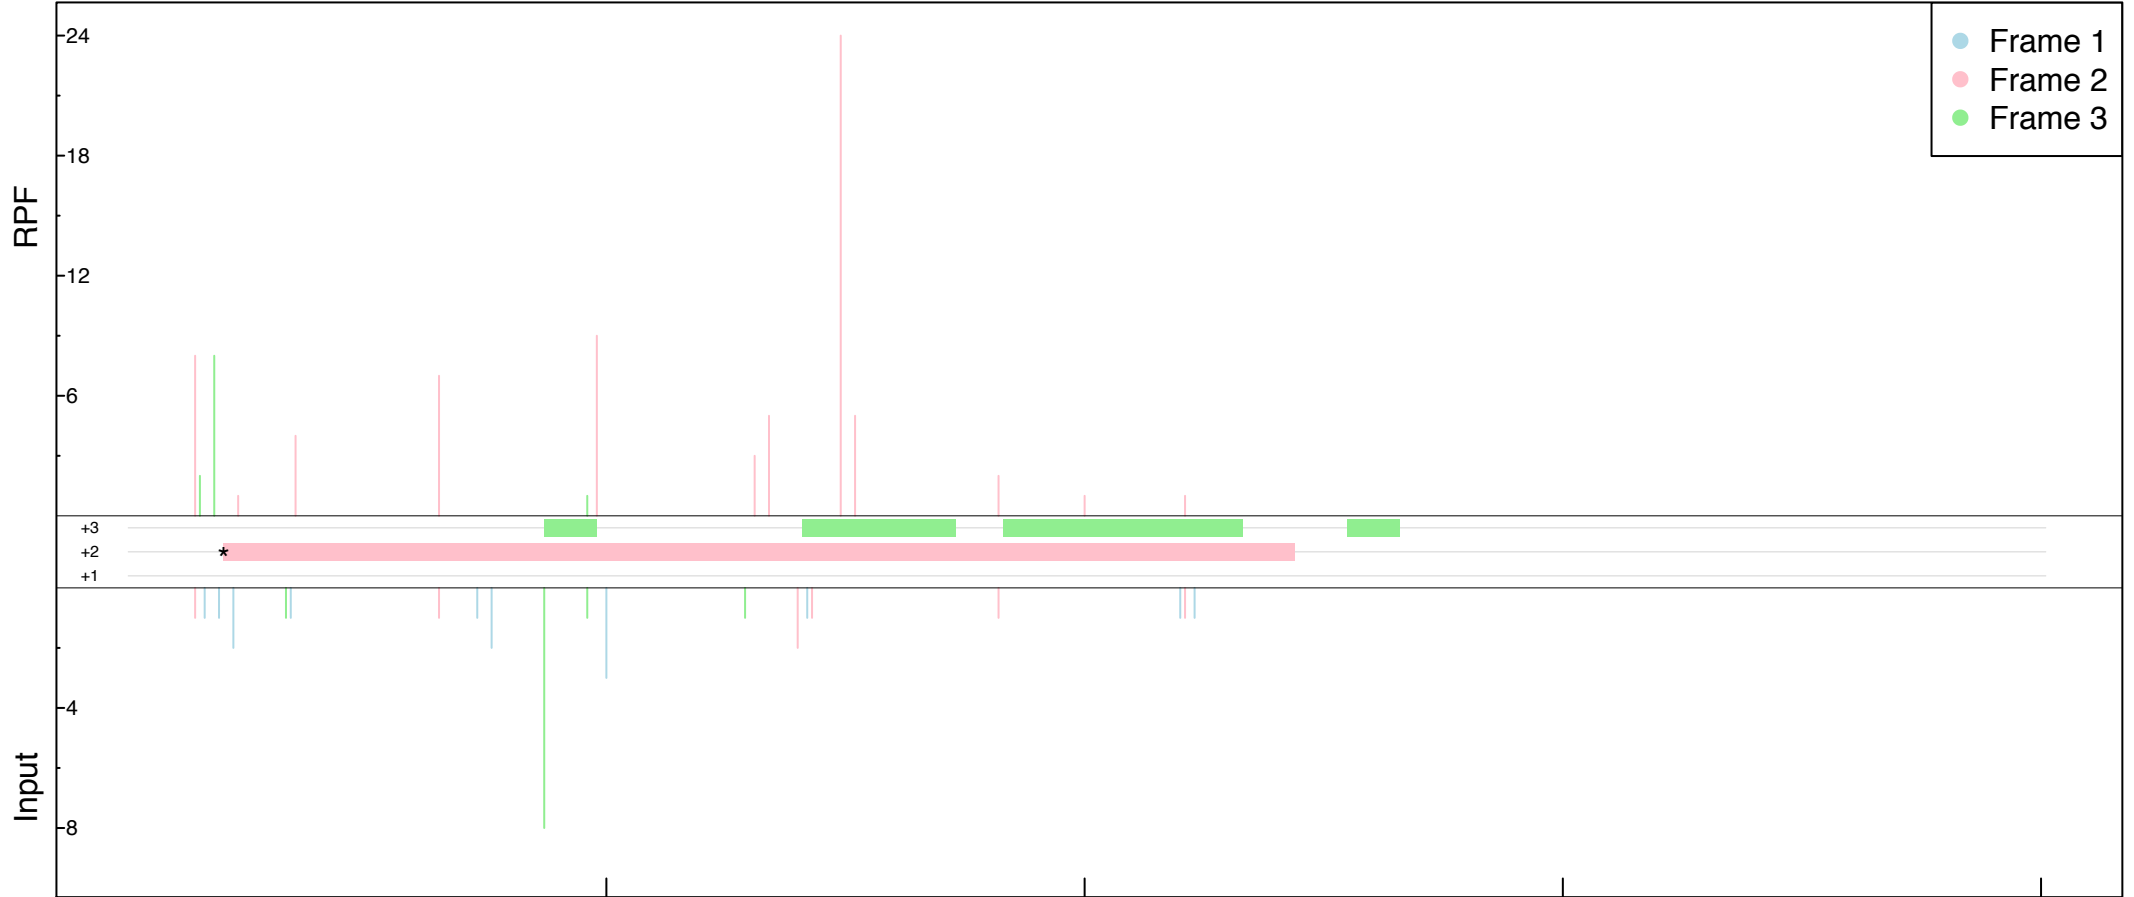

\*MSQGGTGYGREGDWWSVGVFIYELLVGDTPFHSESLVGTYGKIMDHKNILTFPDDIEMSKDGGKDLICAFLLSSK

ENSDART00000131778, Global

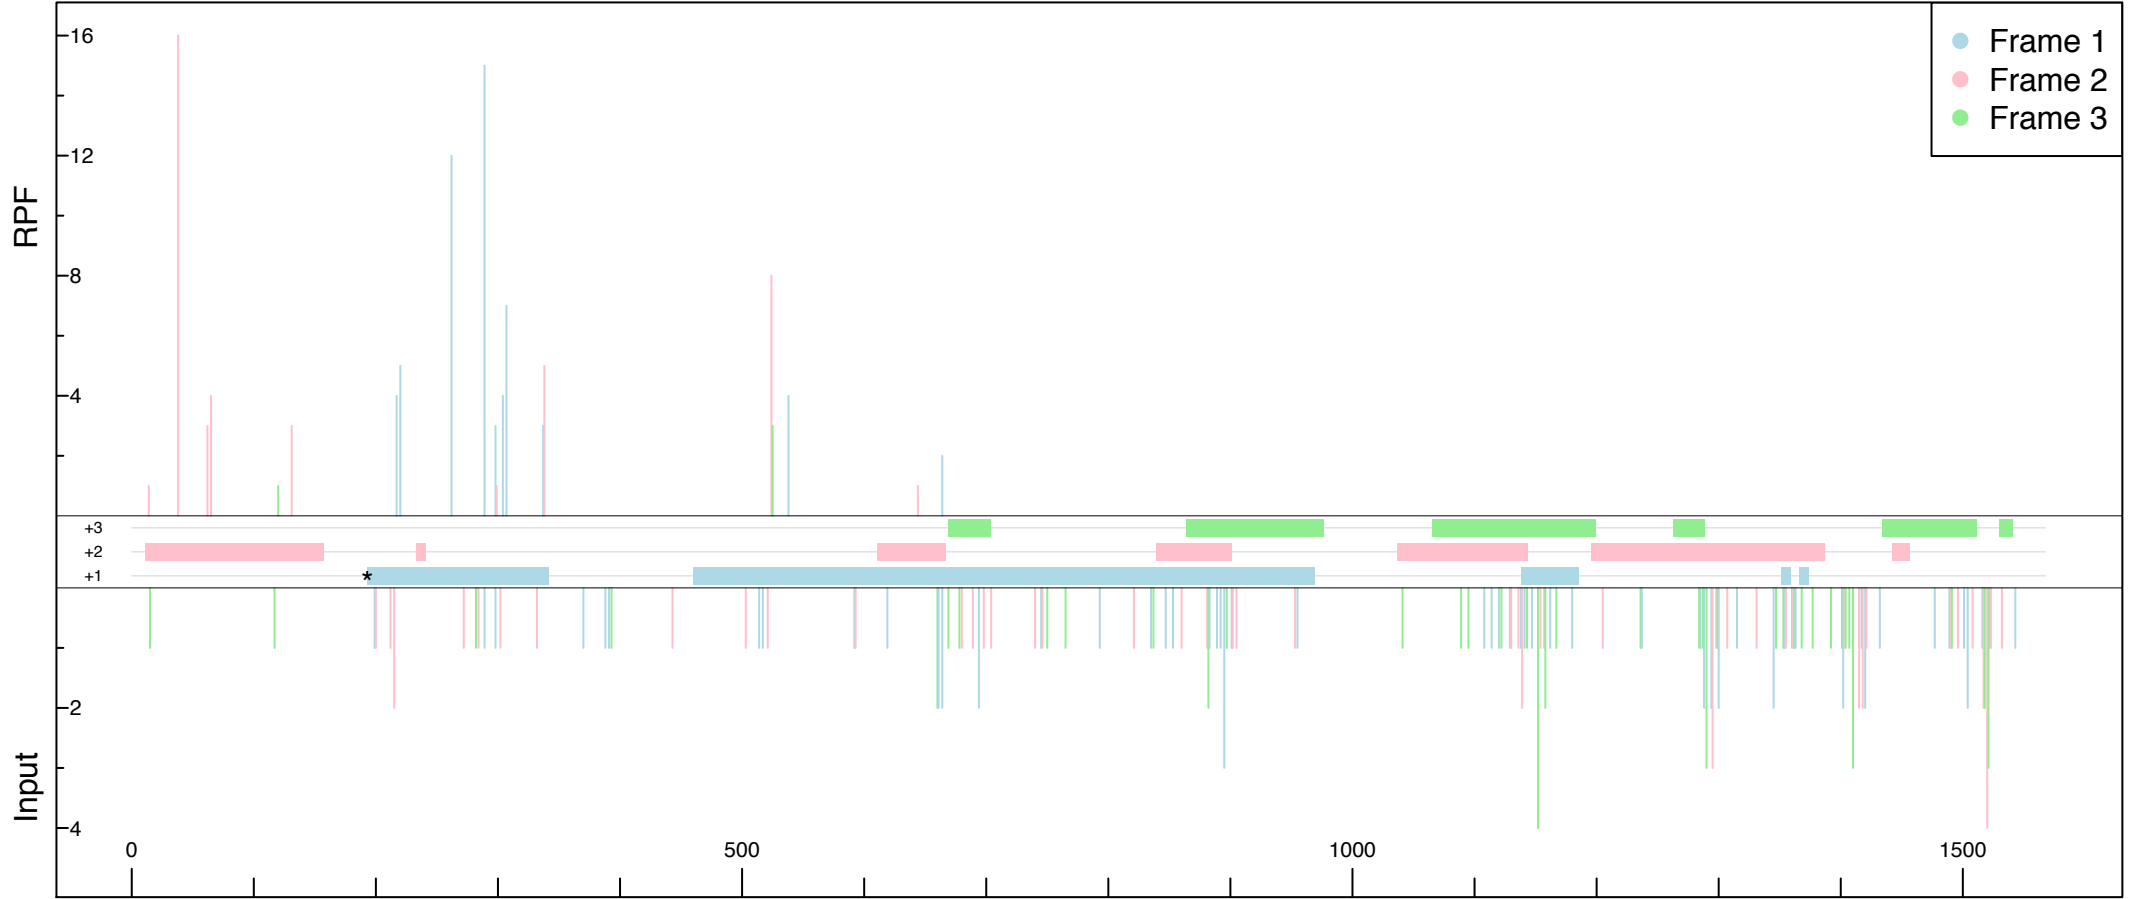

\*MDQRLLLRVIIAEDDITLSSPTTTLDTEGSTADTEILSPVGASPLLRQQ

ENSDART00000137246, Global

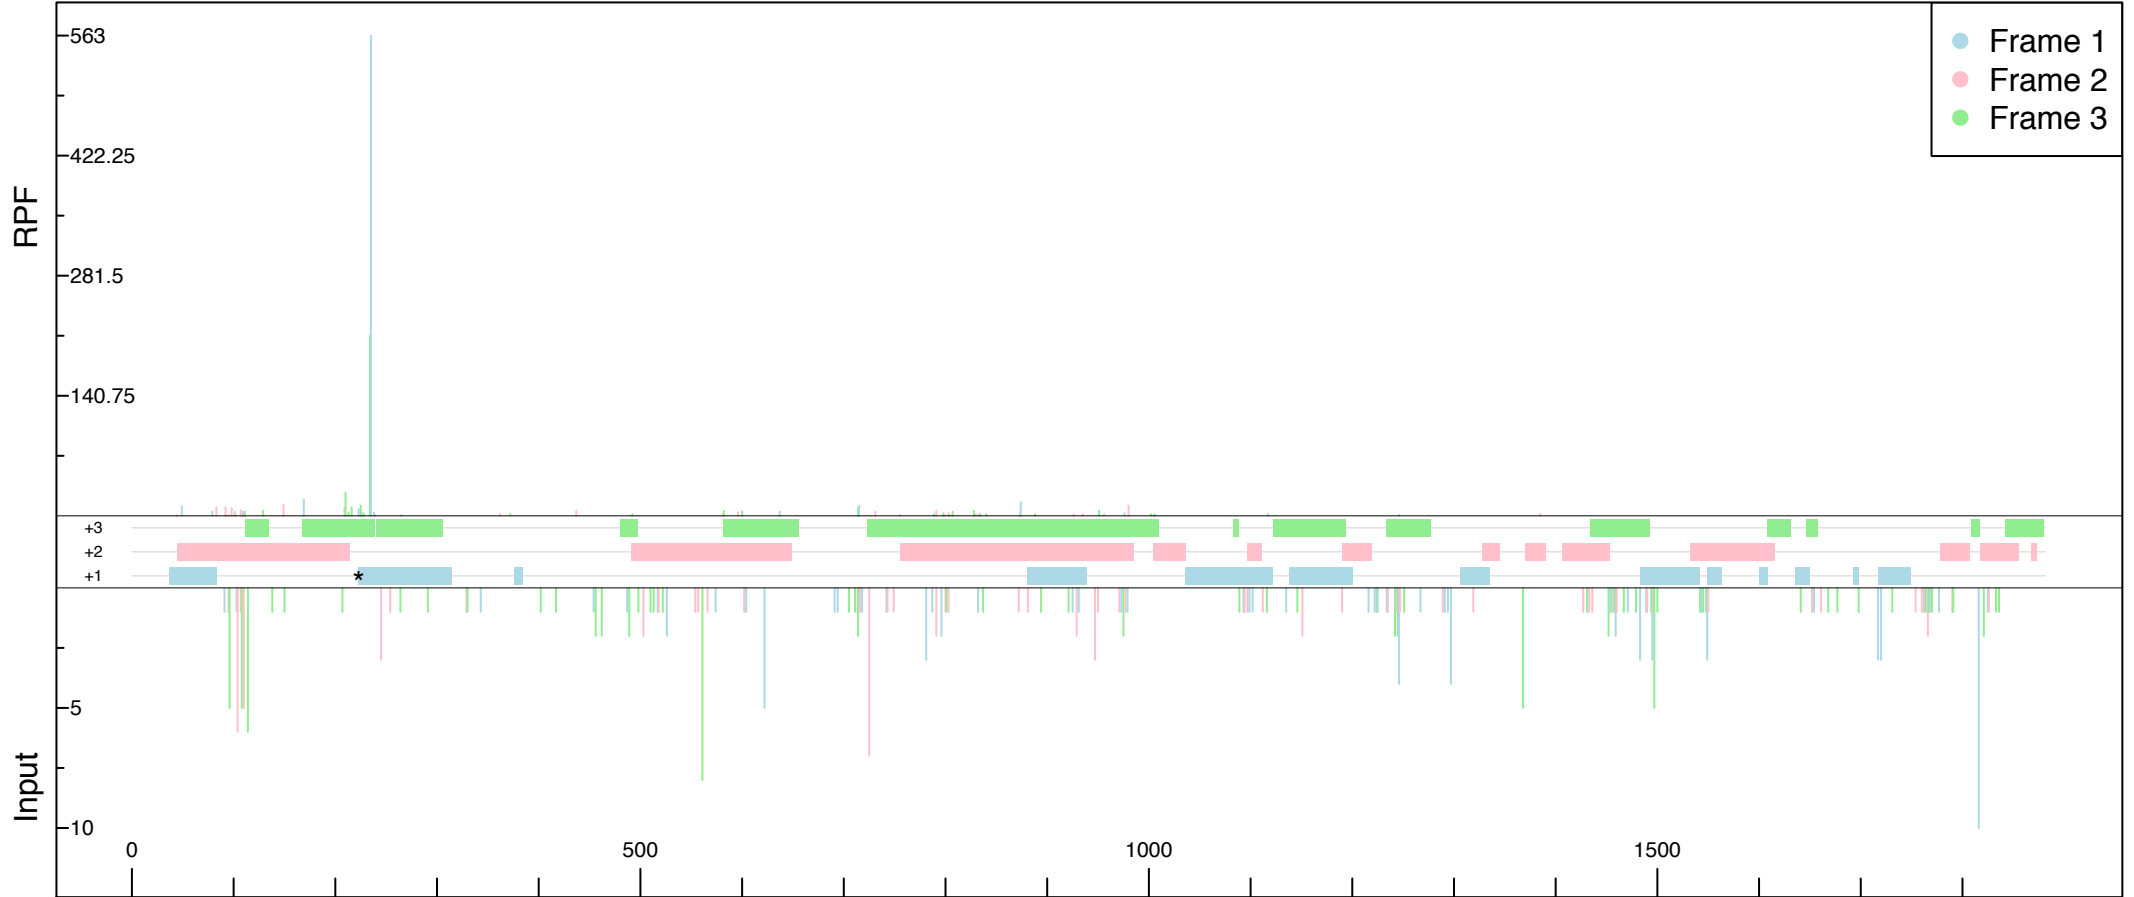

\*MVNLTECIHQPSPTKSELQGQLVLKVPELD

# ENSDART00000131272, Global

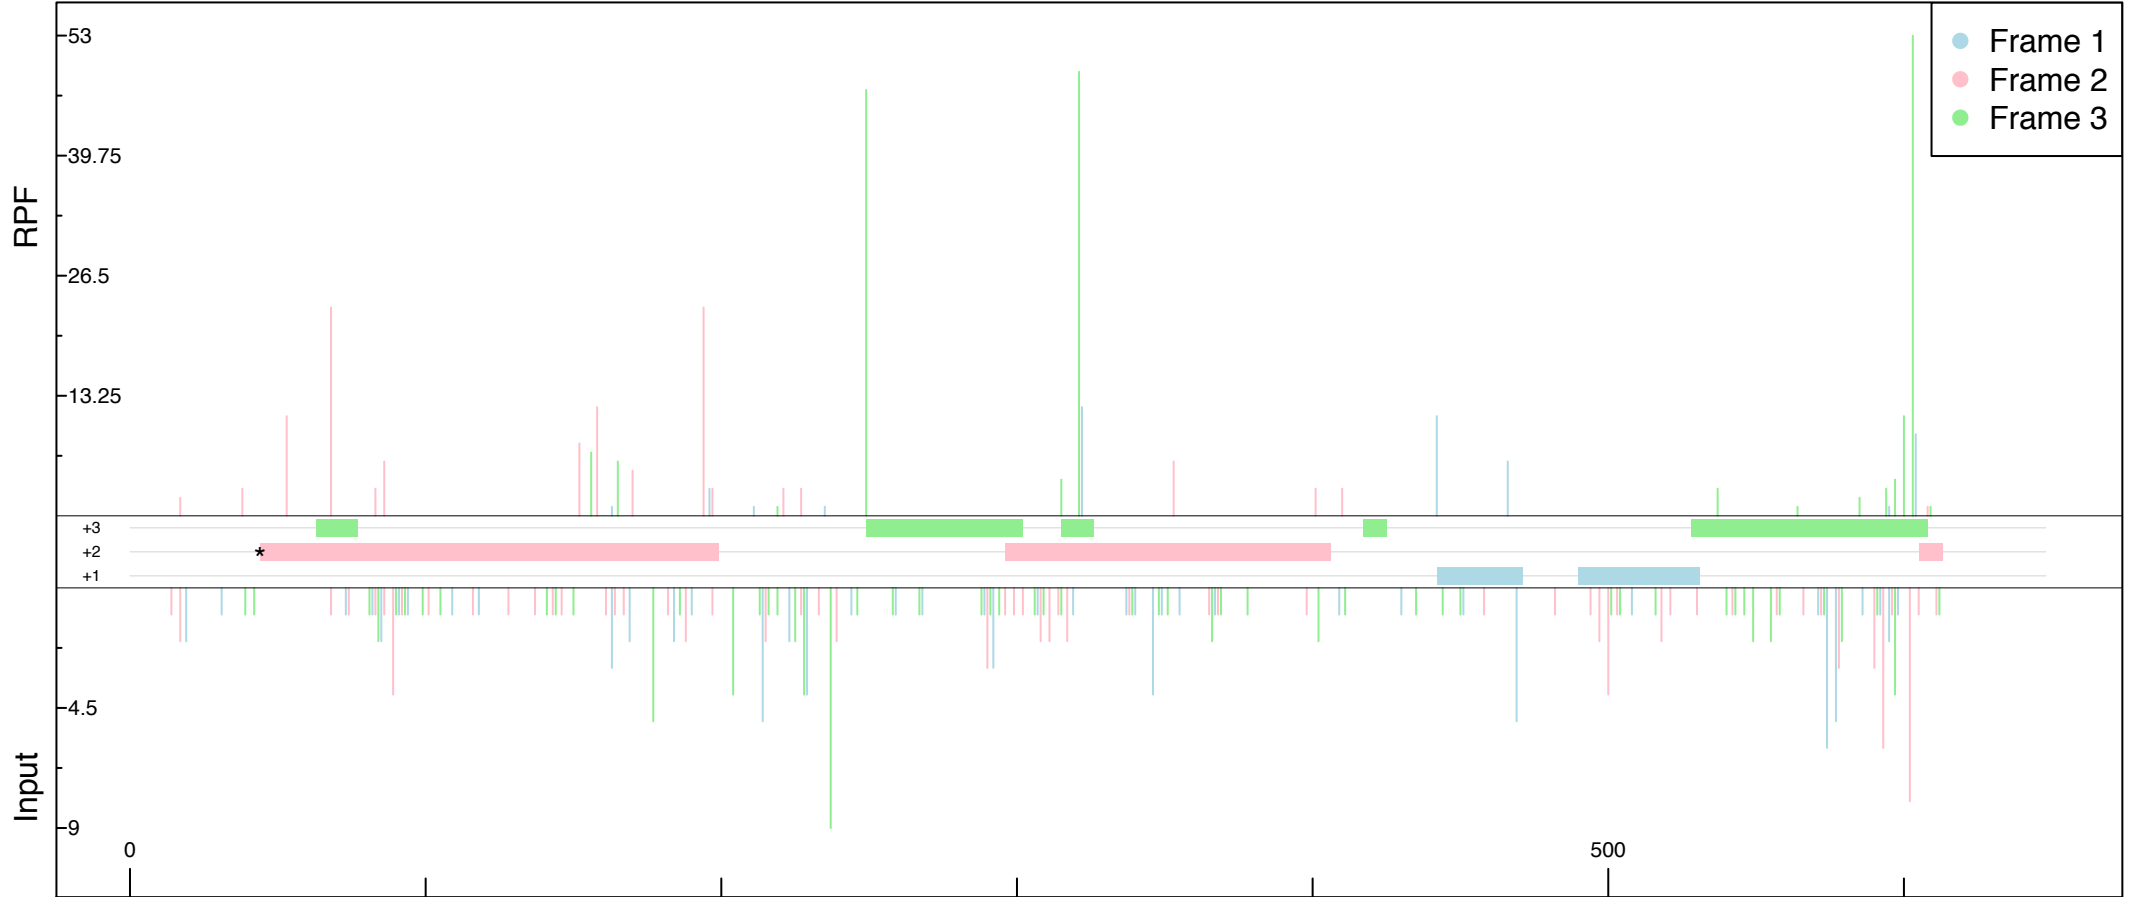

\*MQKLLTYEFILTKELFTALQLNSHNLTELHNCPTQISVEAGTSSCVQQRQS

ENSDART00000144330, Global

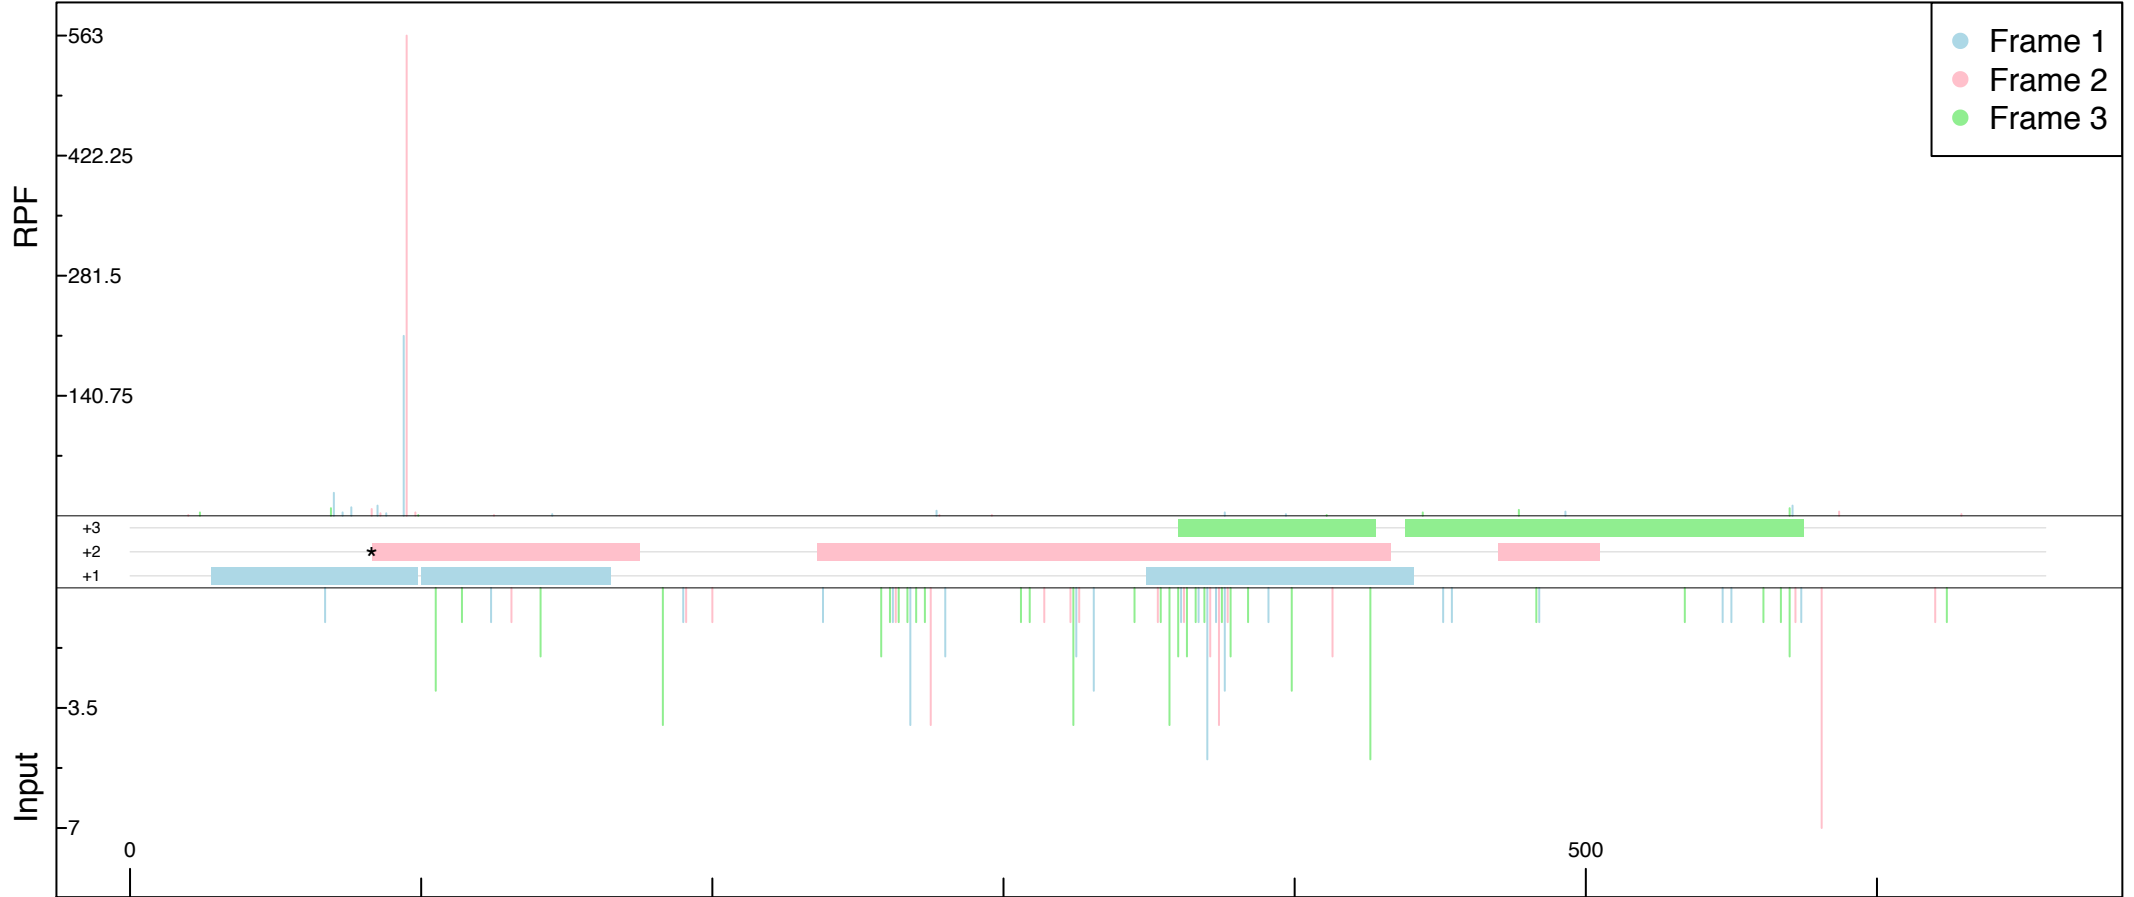

\*MVNLTECIHQPSPTKSELQQLVLKVHKLN



# ENSDART00000149932, Global

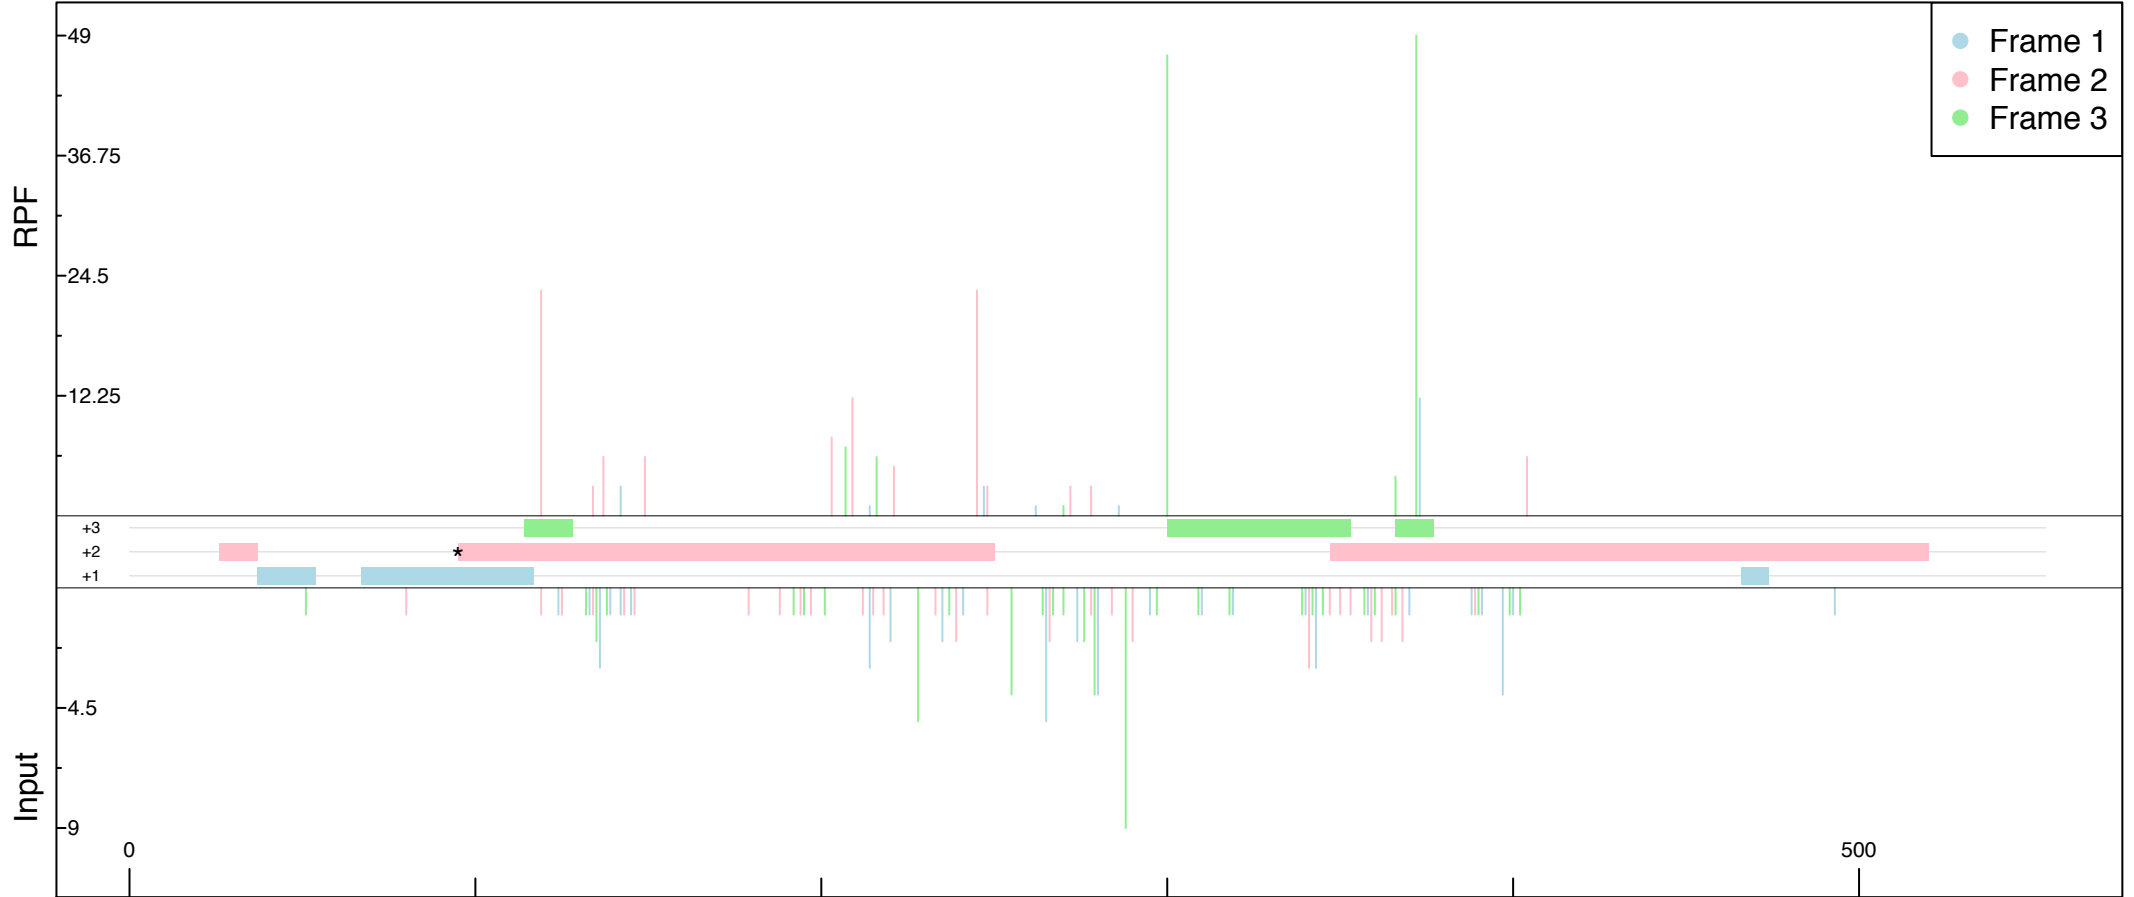

\*MQKLLTYEFILTKELFTALHLNShNLTELHNCPTQISVEAGTSSCVQQRQS

linc-si:dkey-14d8.21, Global

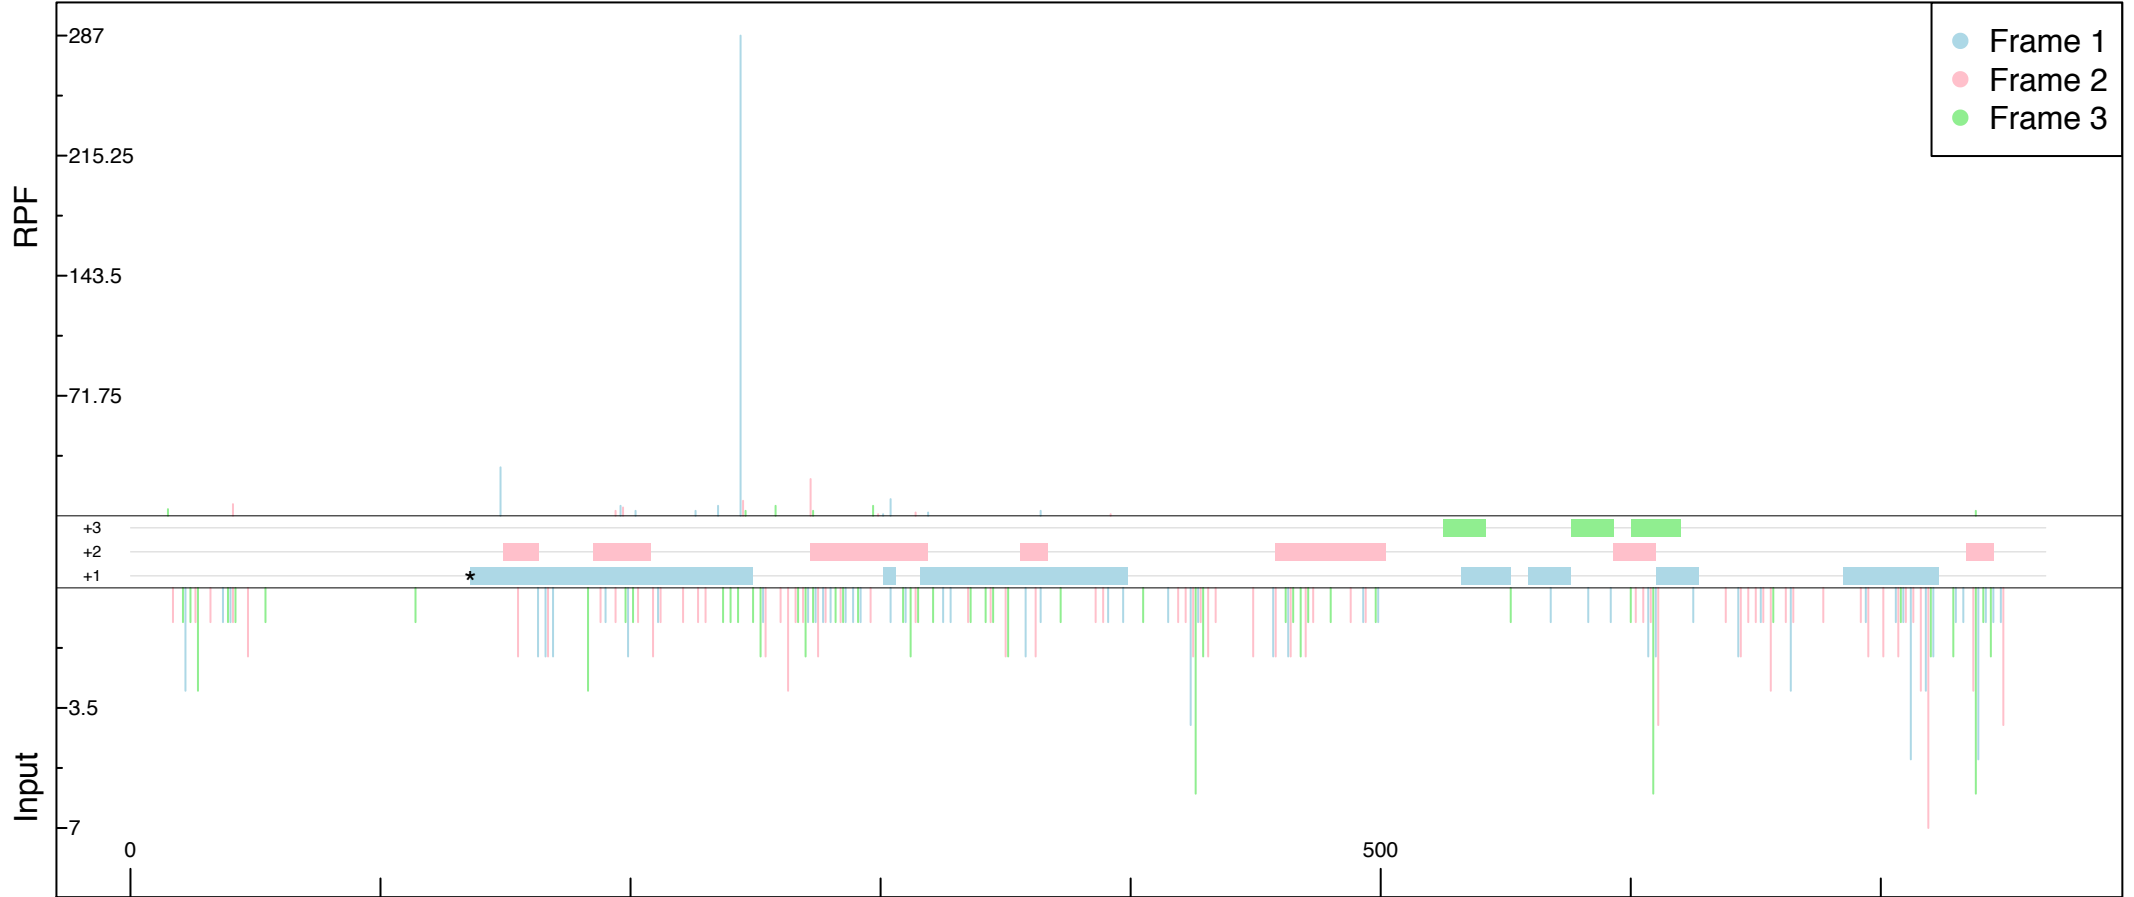

\*MSSGDGSTLISVHYAAHVVSLSSLMDSVQLMQLSETR

# ENSDART00000132803, Global

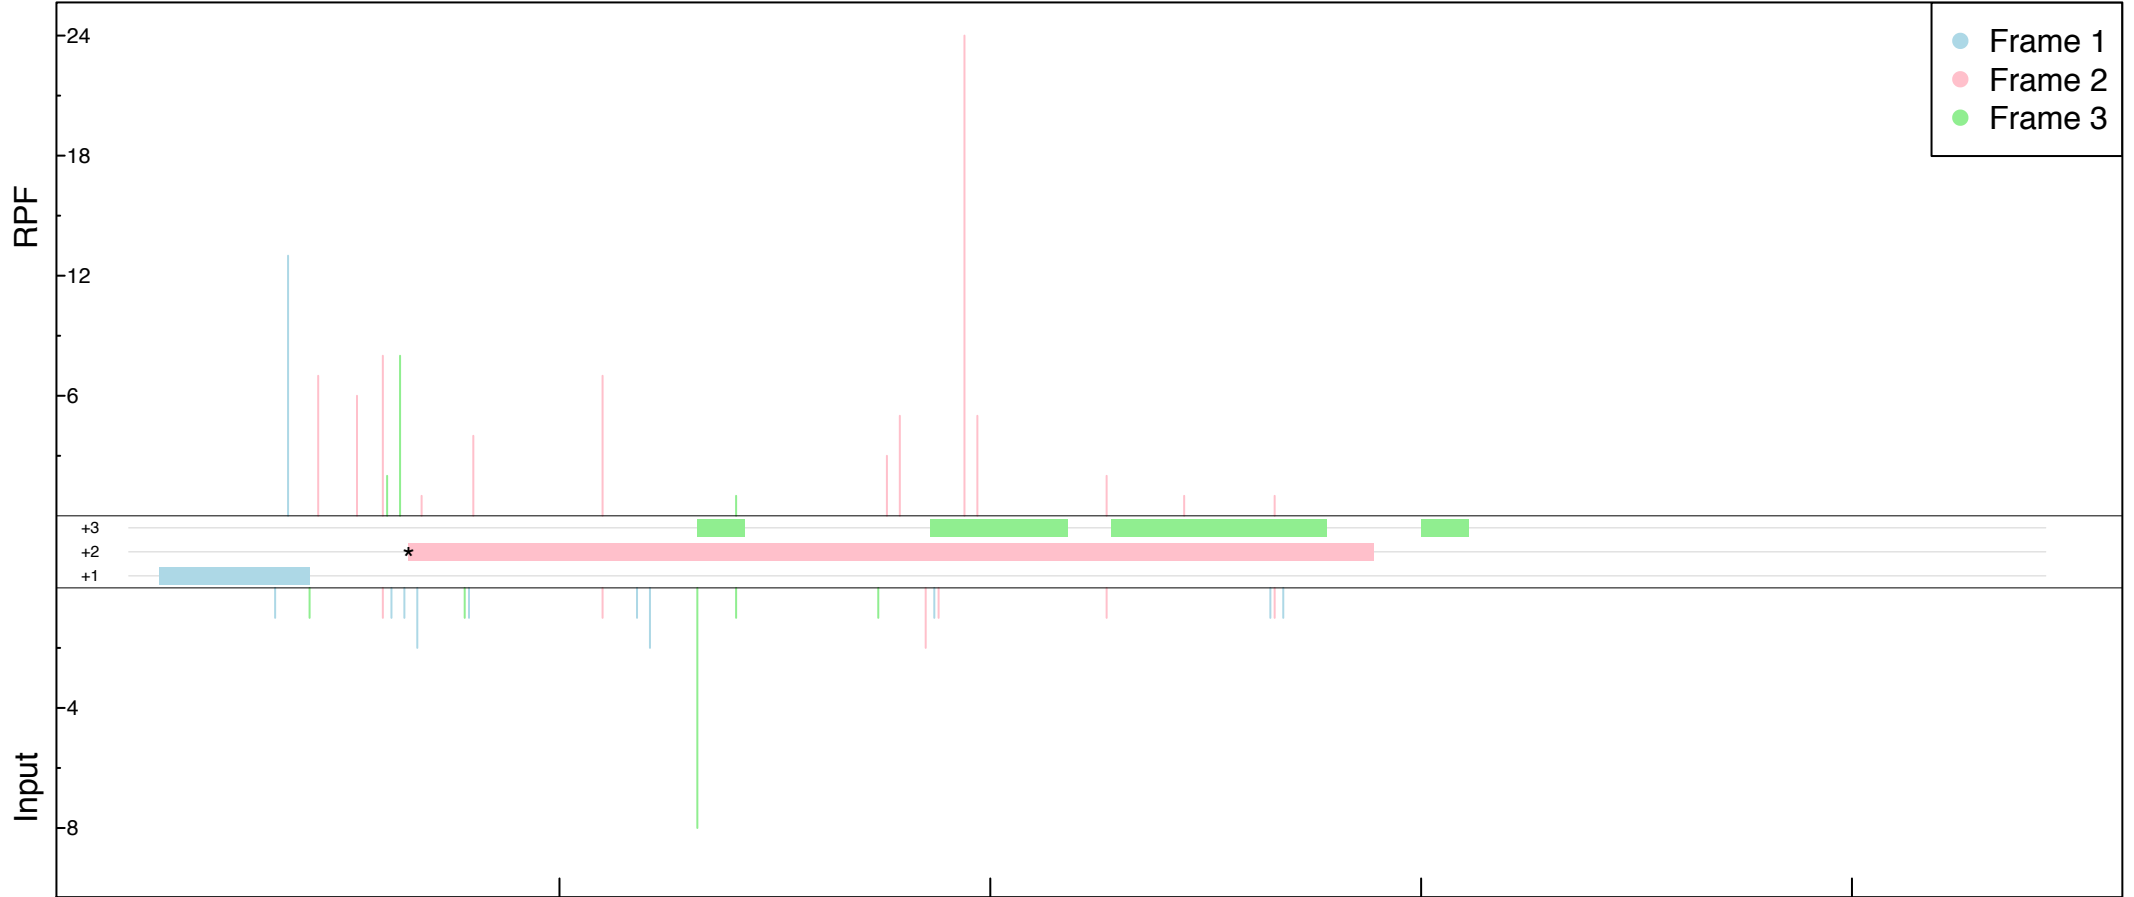

\*MSQGGTGYGREGDWWSVGVIYELLVGDTPVHSESLVGTYGKIMDHKNILTFPDDIEMSKDGLKDLICAFLLSSK

# ENSDART00000132818, Global

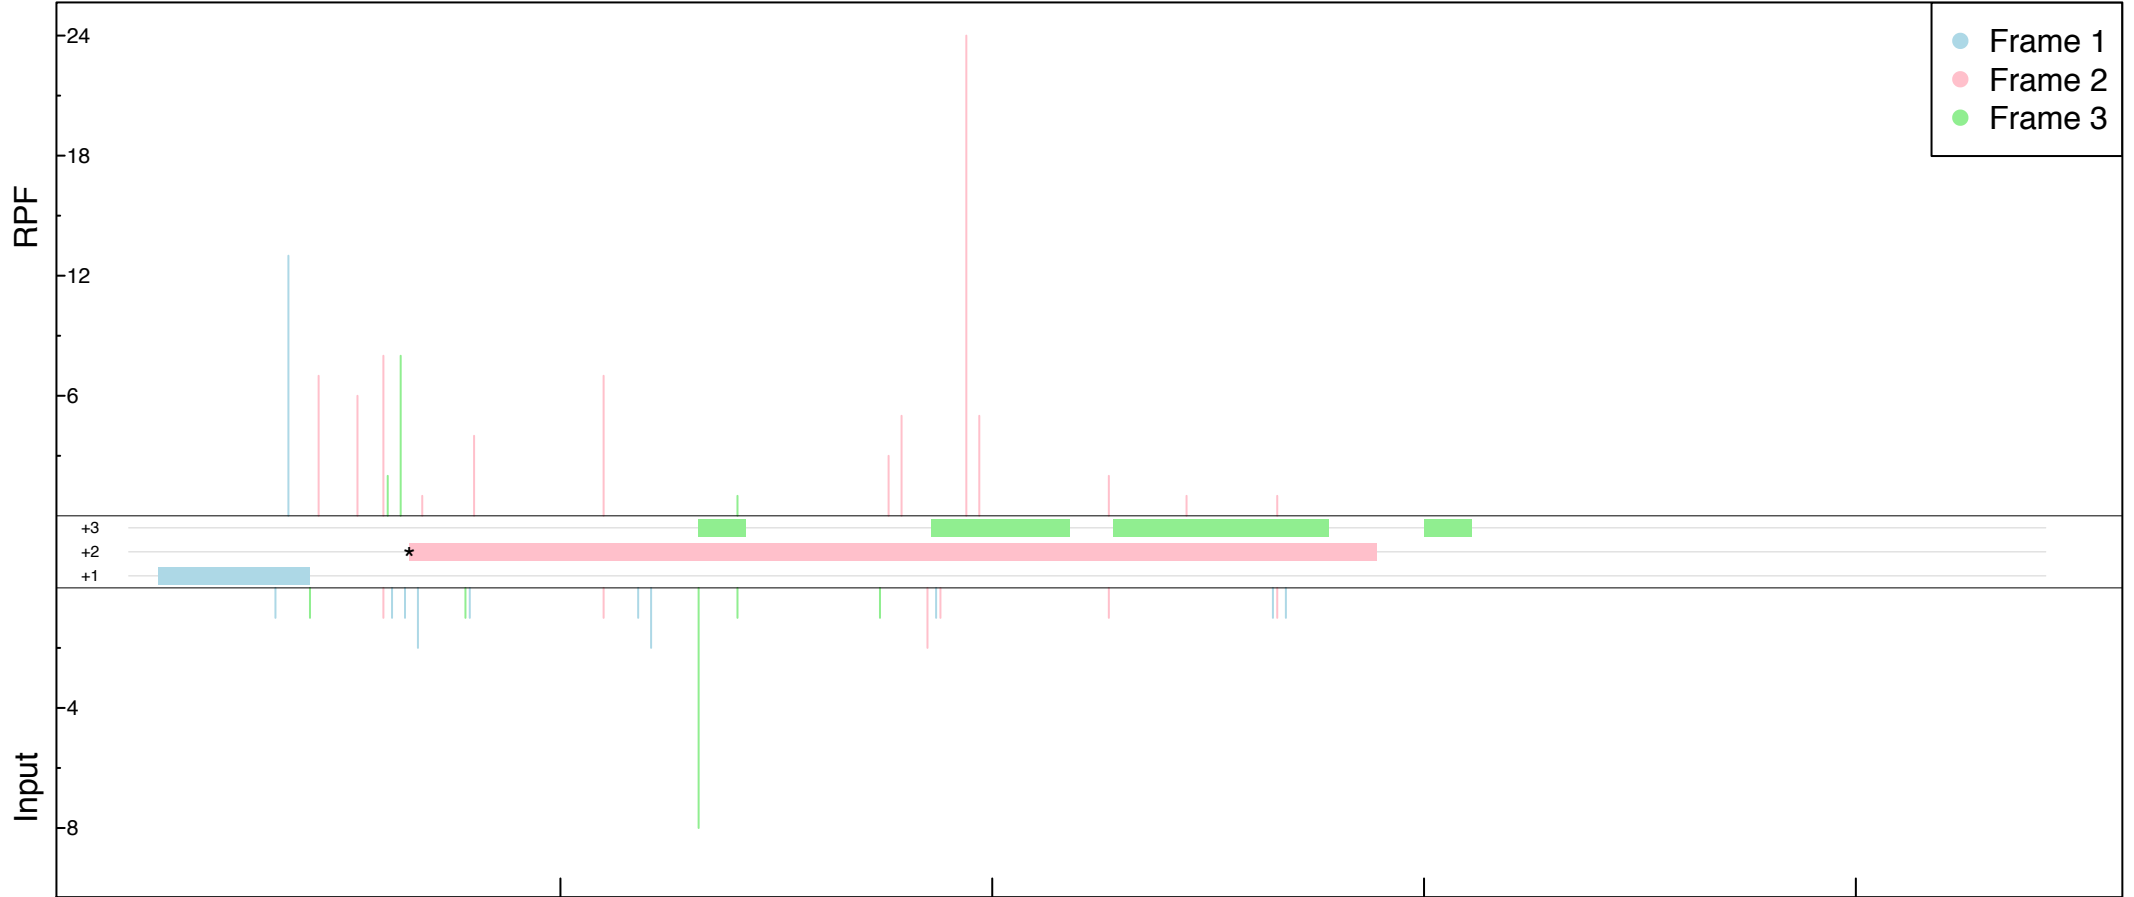

\*MSQGGTGYGREGDWWVSGVFIYELLVGDTPVHSESLVGTYGKIMDHKNILTFPDDIEMSKDGDLDICAFLLSSK

ENSDART00000136118, Global

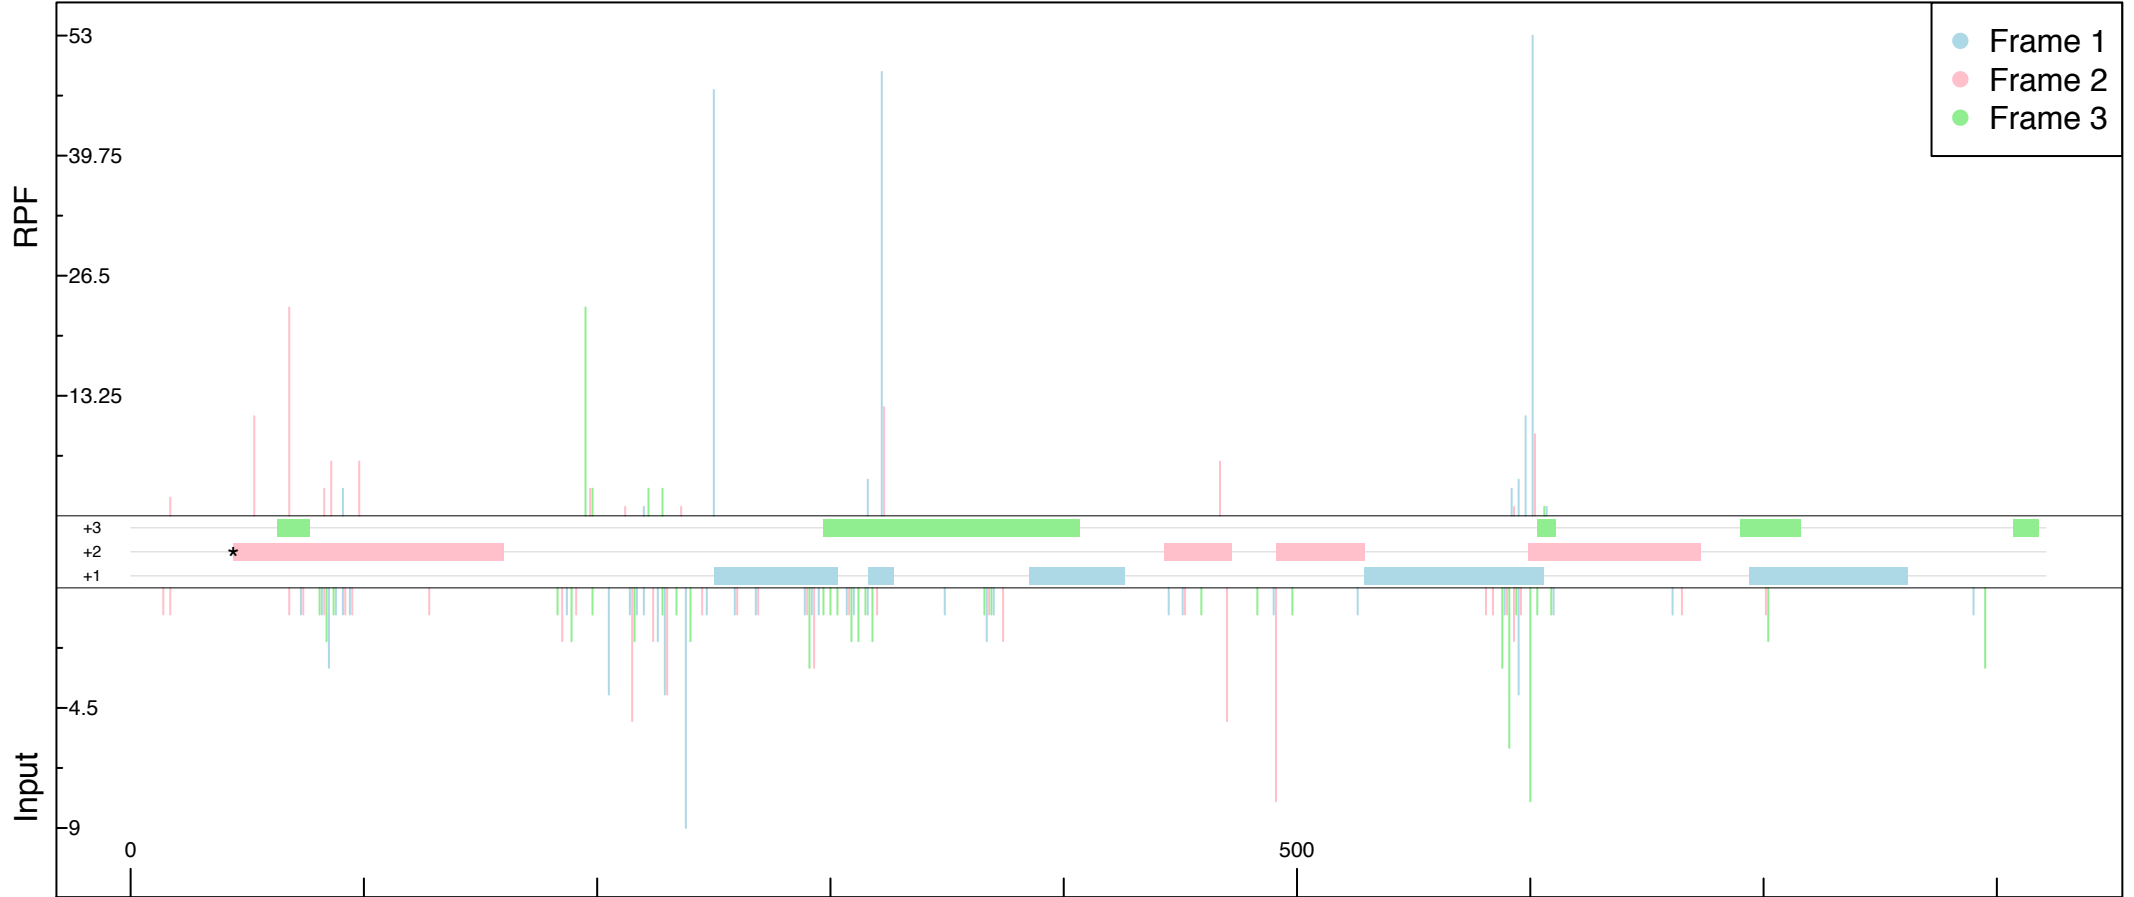

\*MQKLLTYEFILTKELFTALHLNSHNLTELHNCPTQDQY

ENSDART00000136997, Global

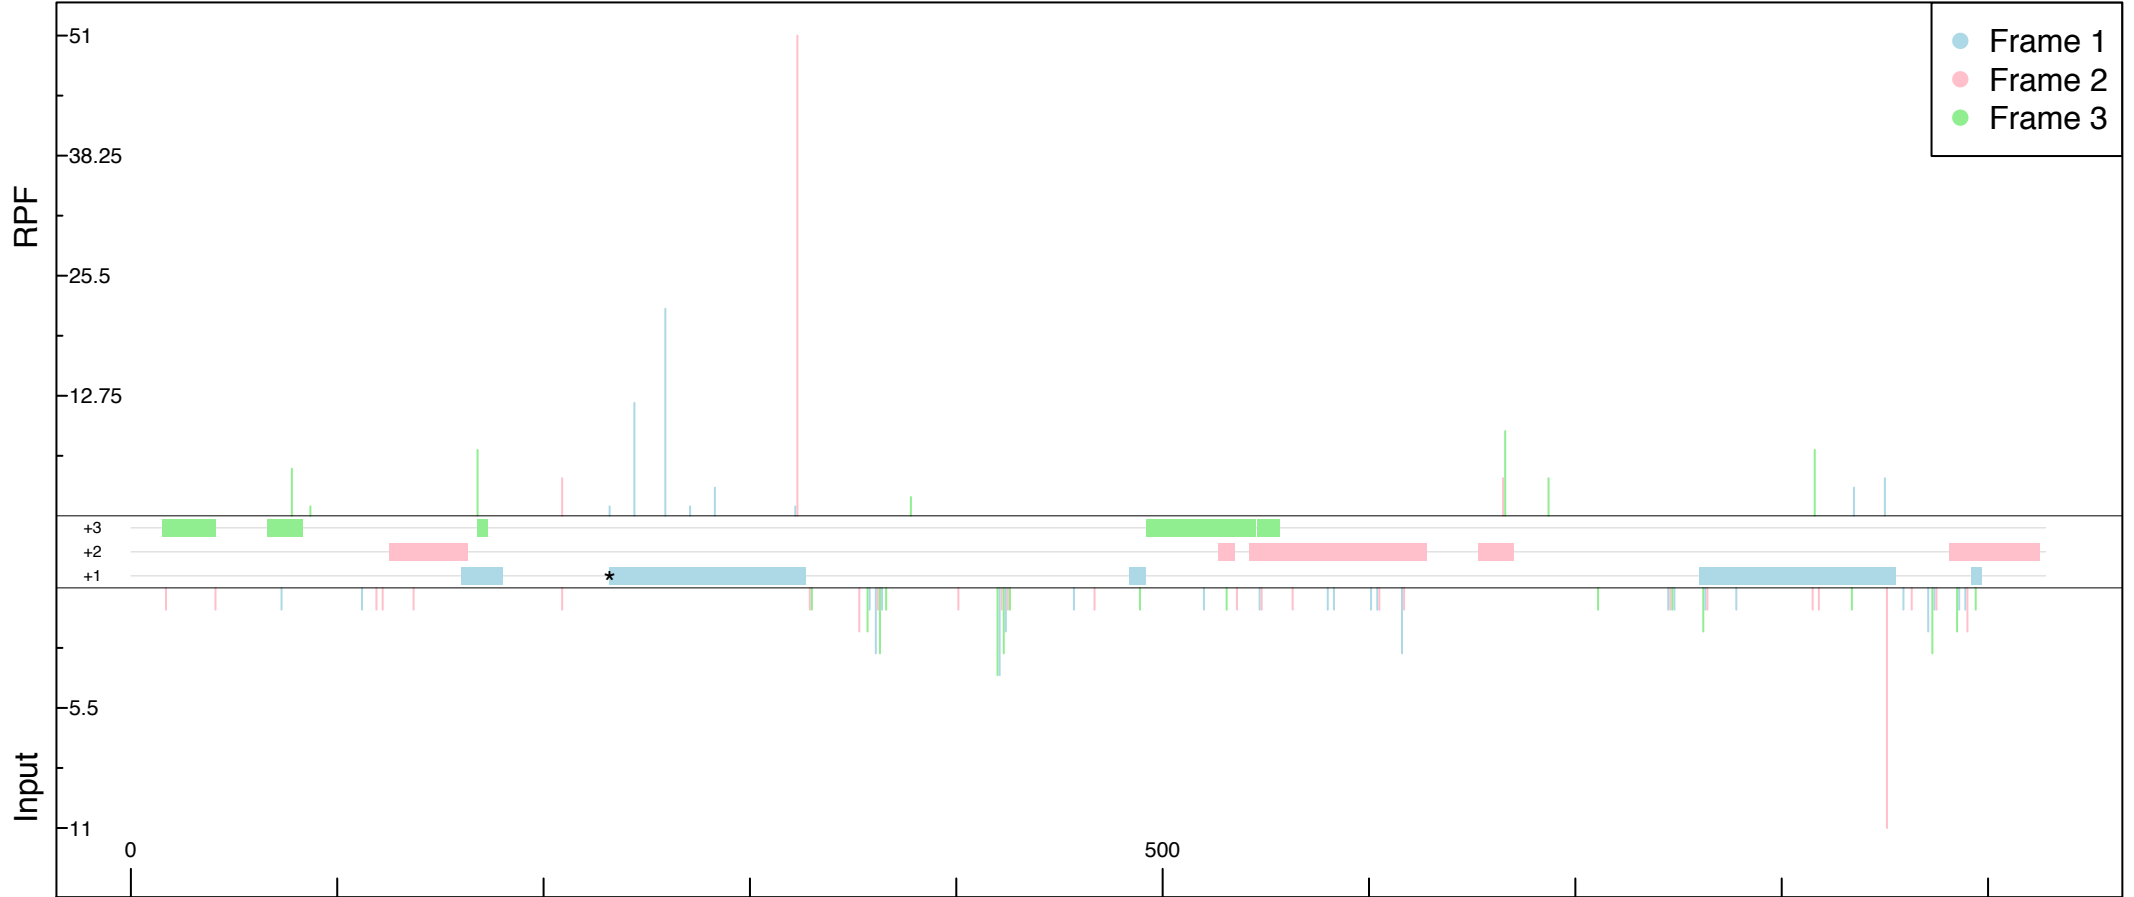

\*MALKKECTTRCRRKSSLMLLDSRLTKPLKVS

ENSDART00000133640, Global

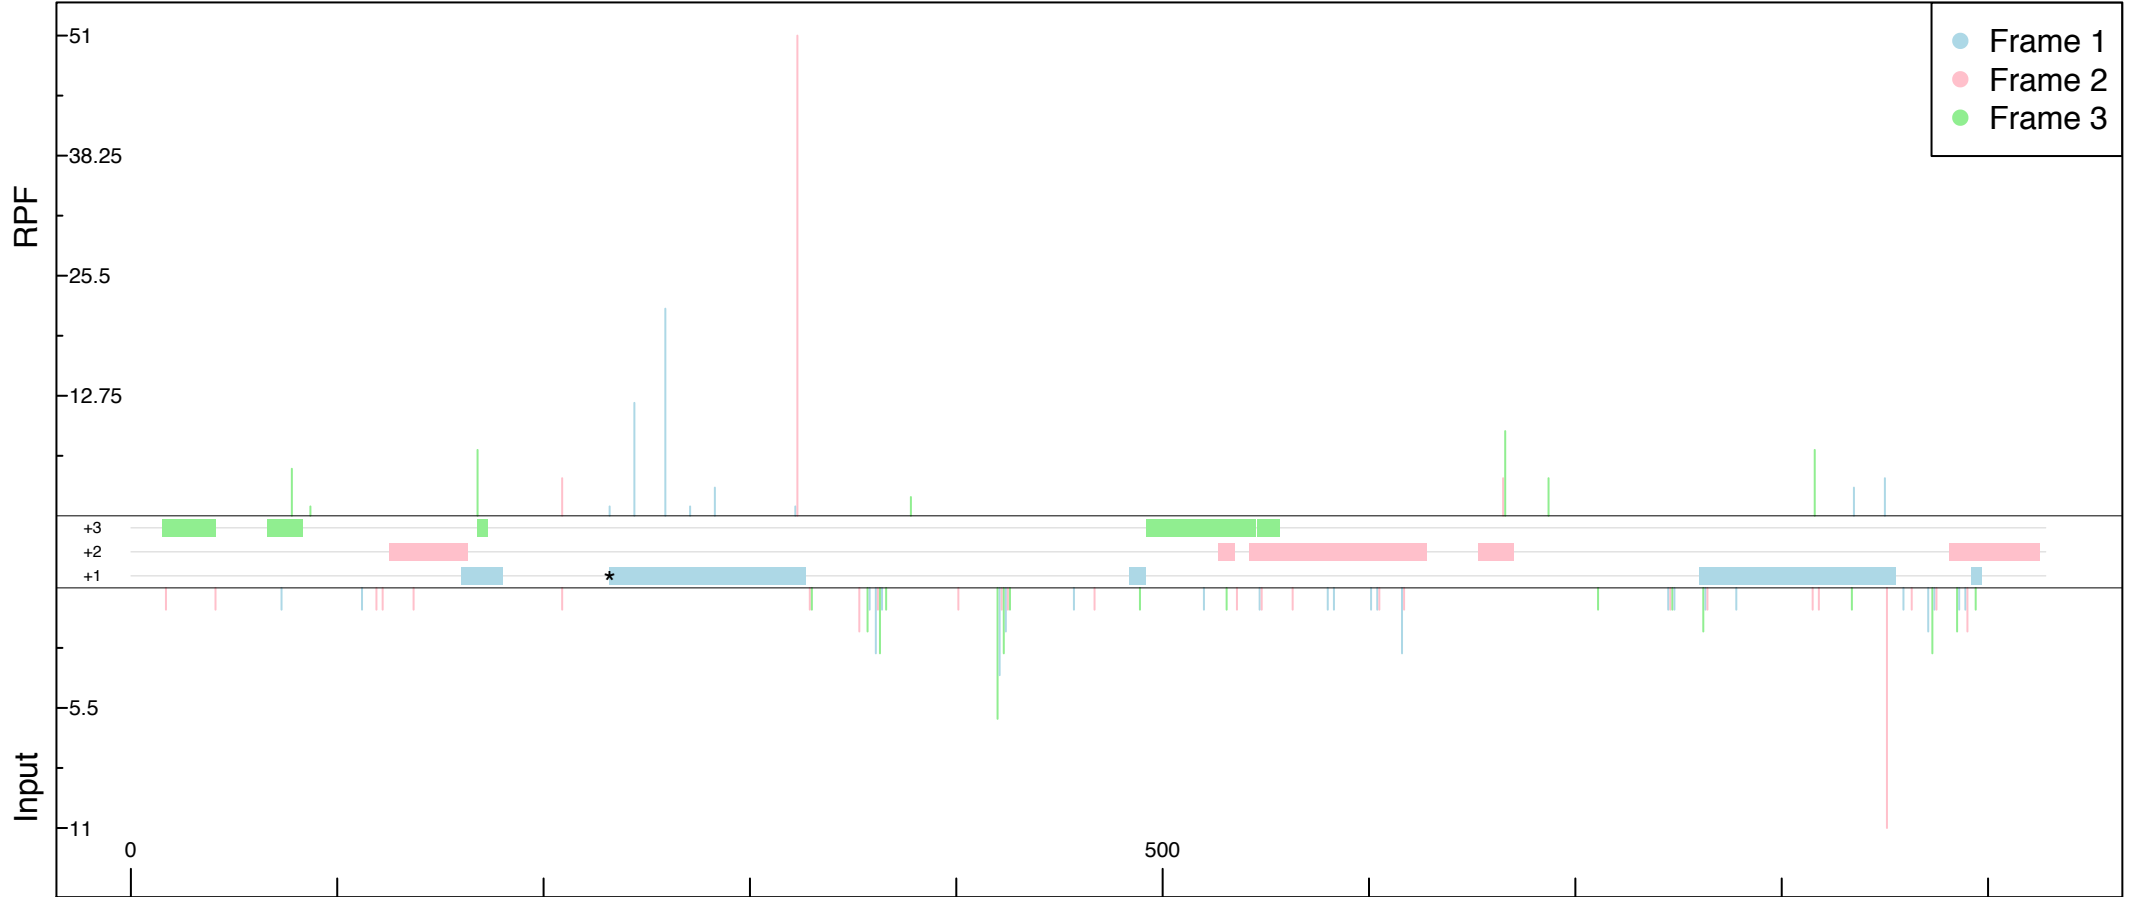

\*MALKKECTTRCRRKSSLMLLDSRLTKPLKVS

# linc-cdk9, Global

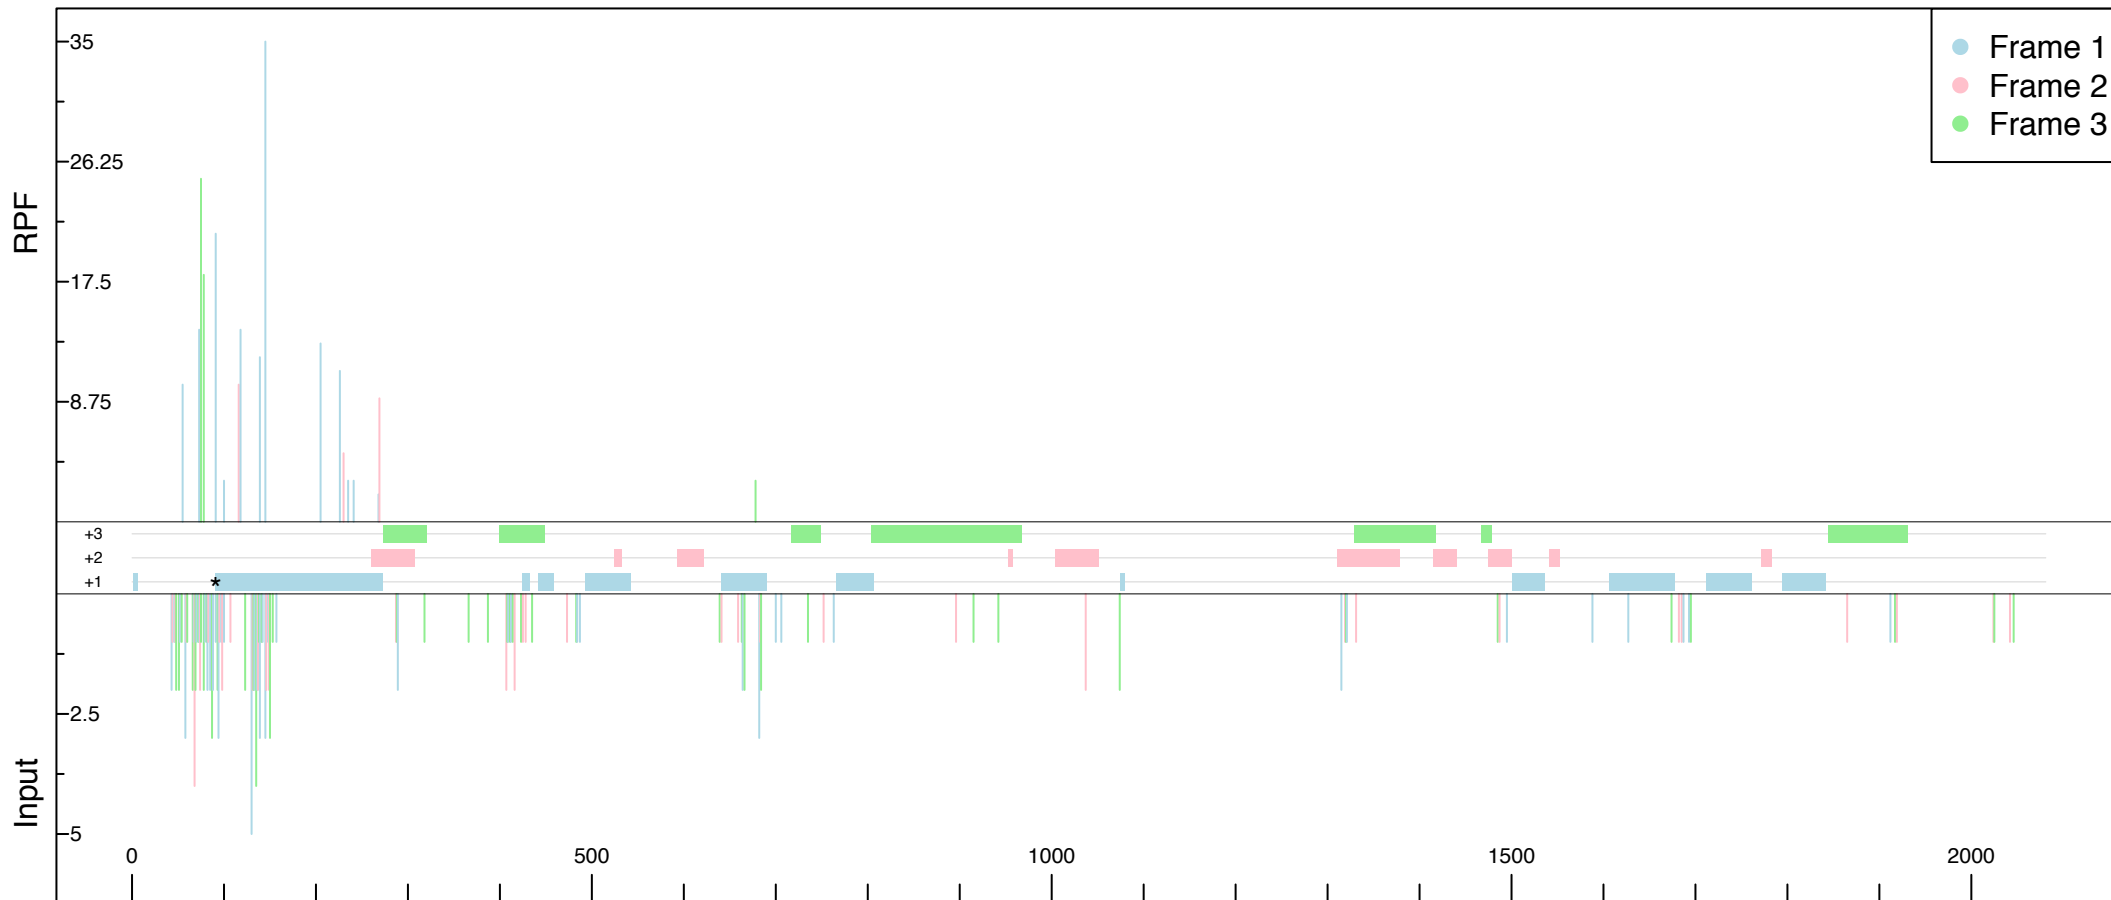

\*MENKTEKPHTTPEPRETRKHRRVNSMGYLKPYMSSDPVKPESQIAEILQIVKIKININVER



# ENSDART00000135007, Global

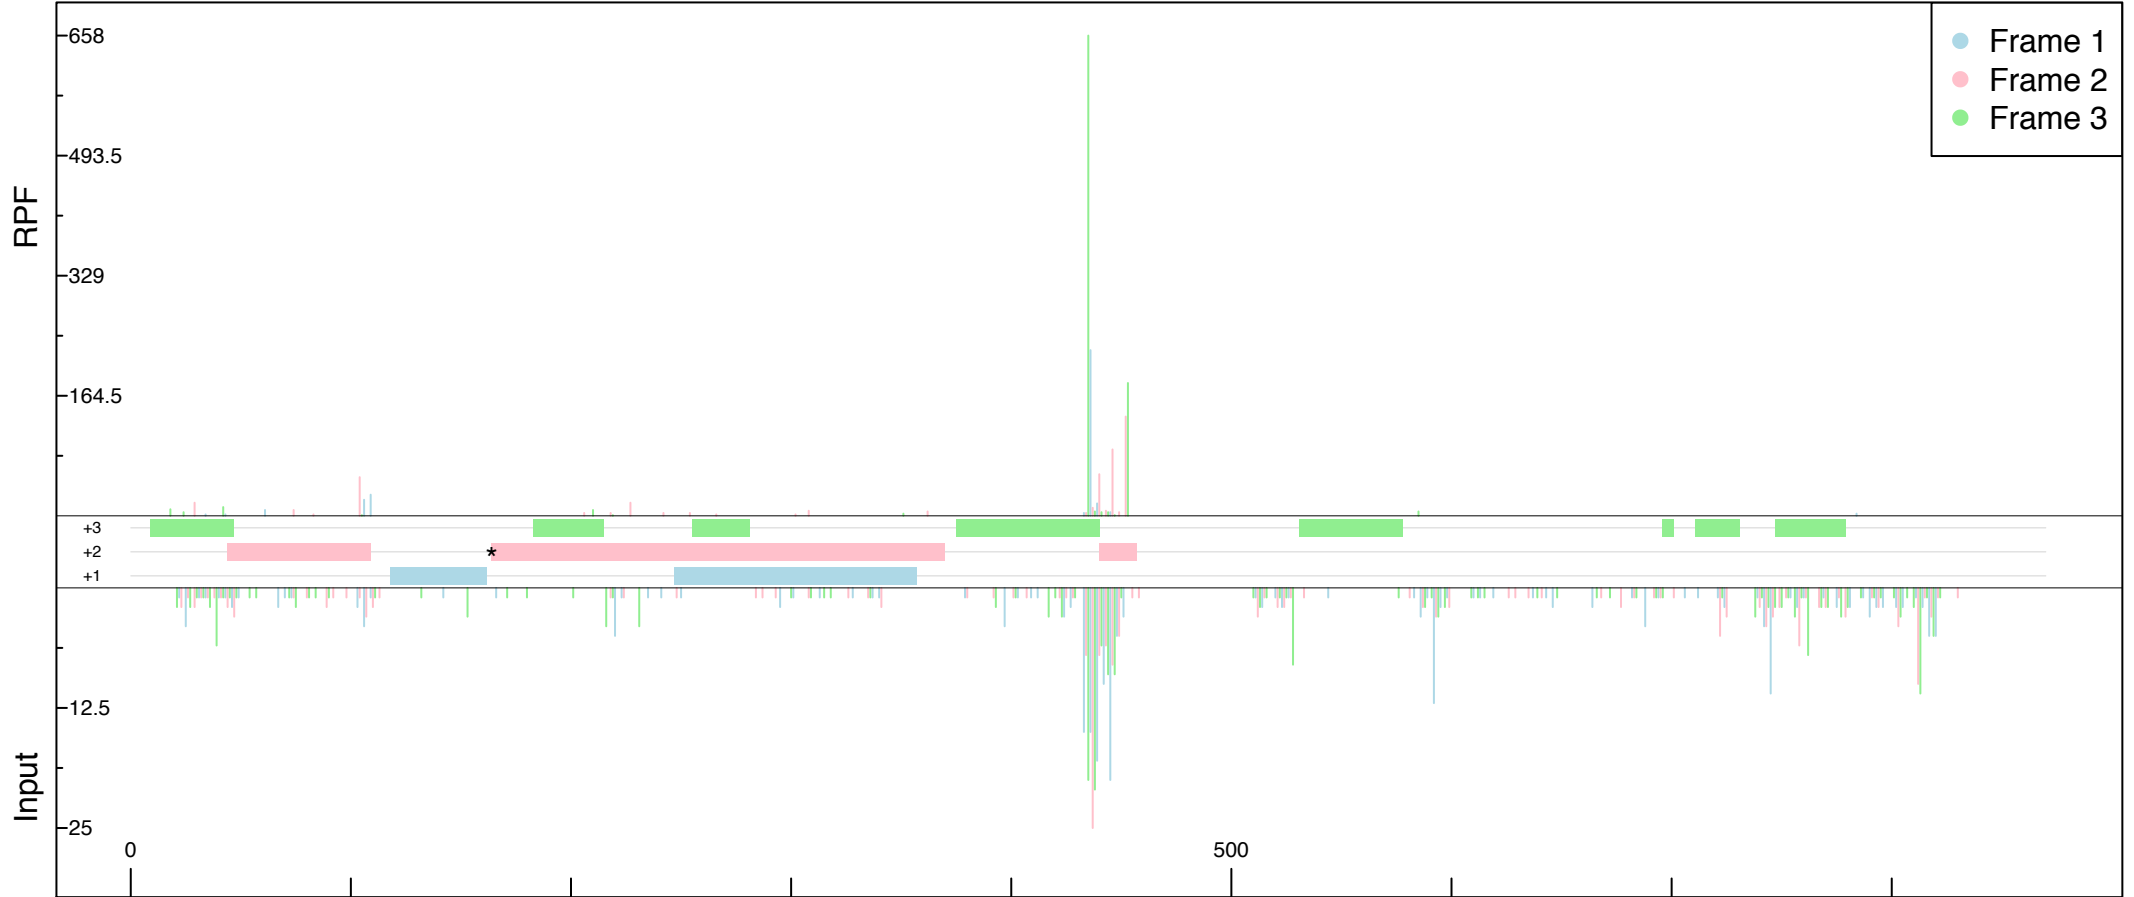

\*MKISEIDAAPQVPSPMTMAGSLRTPSRCTDAVHSSTPMNIYSPCSSAVRDQDNLLQLVMSFTTEKKF

ENSDART00000144236, Global

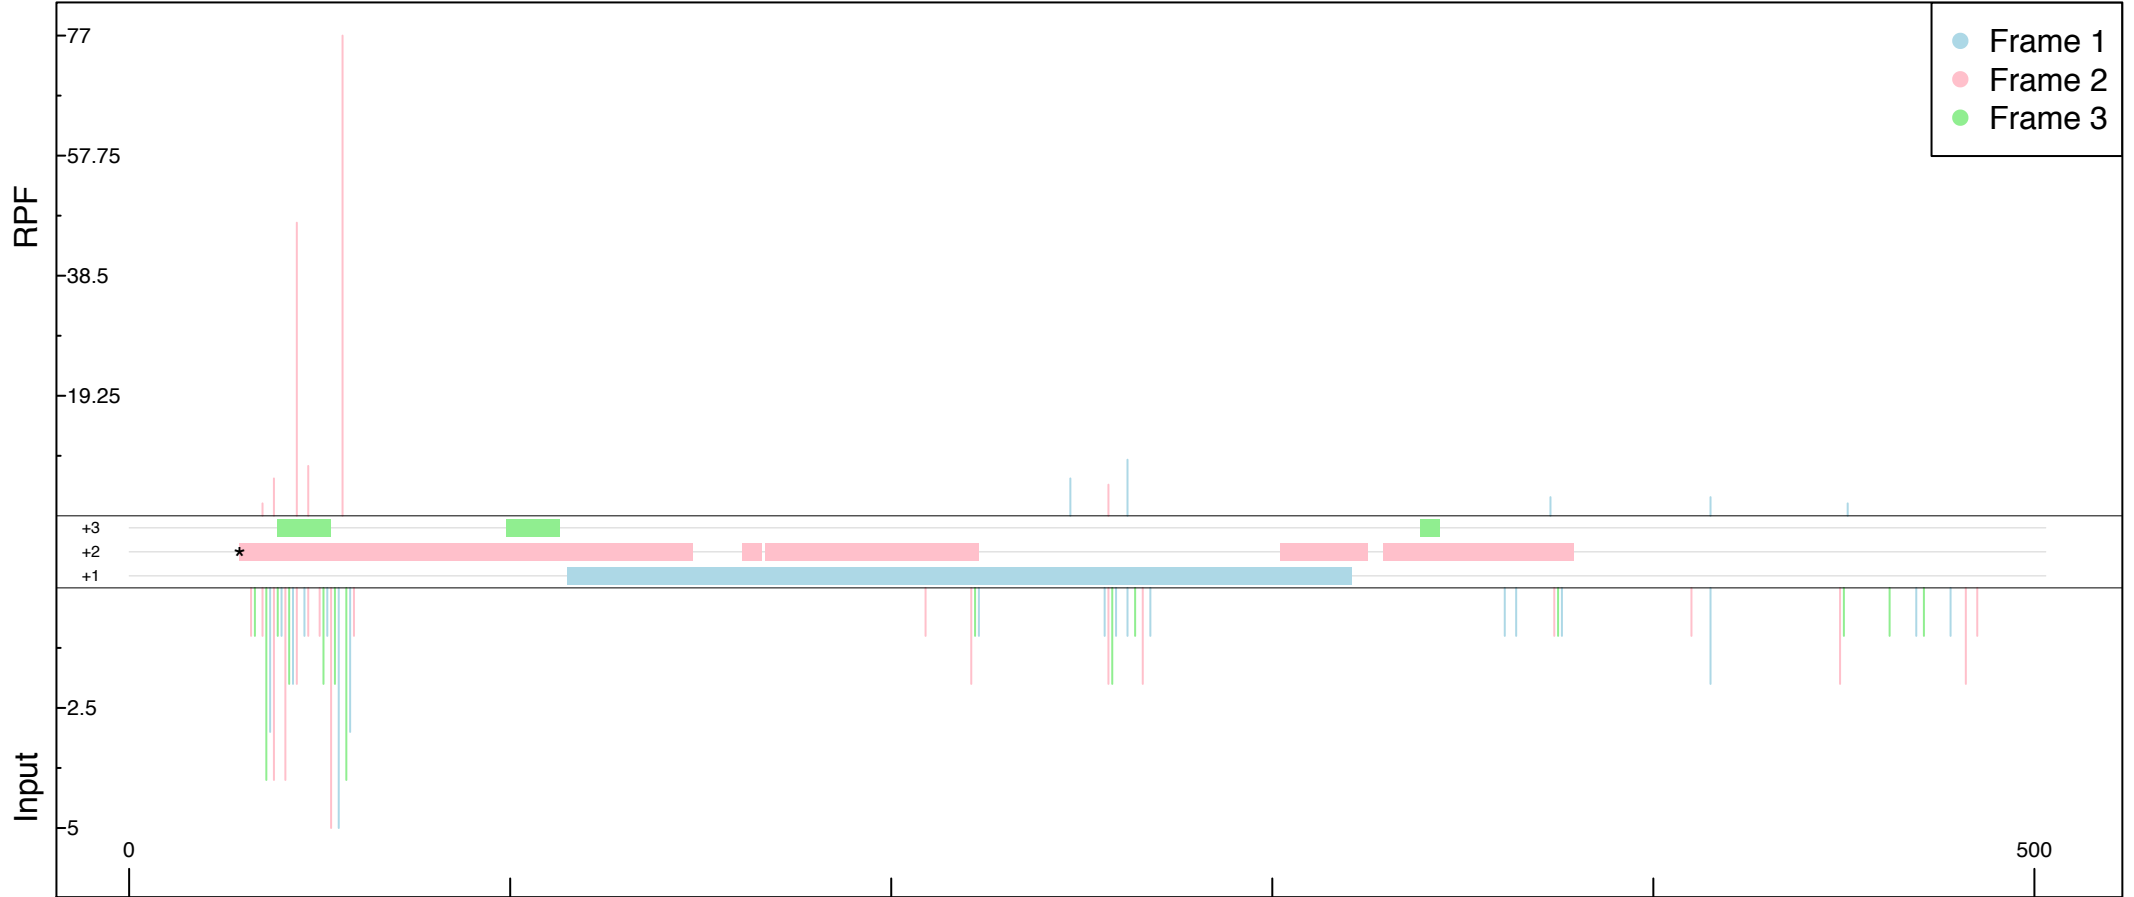

\*MQQYAVDVTLPDTAYQYLILSEDGKQVTCFLIVTKNMT

ENSDART00000134169, Global

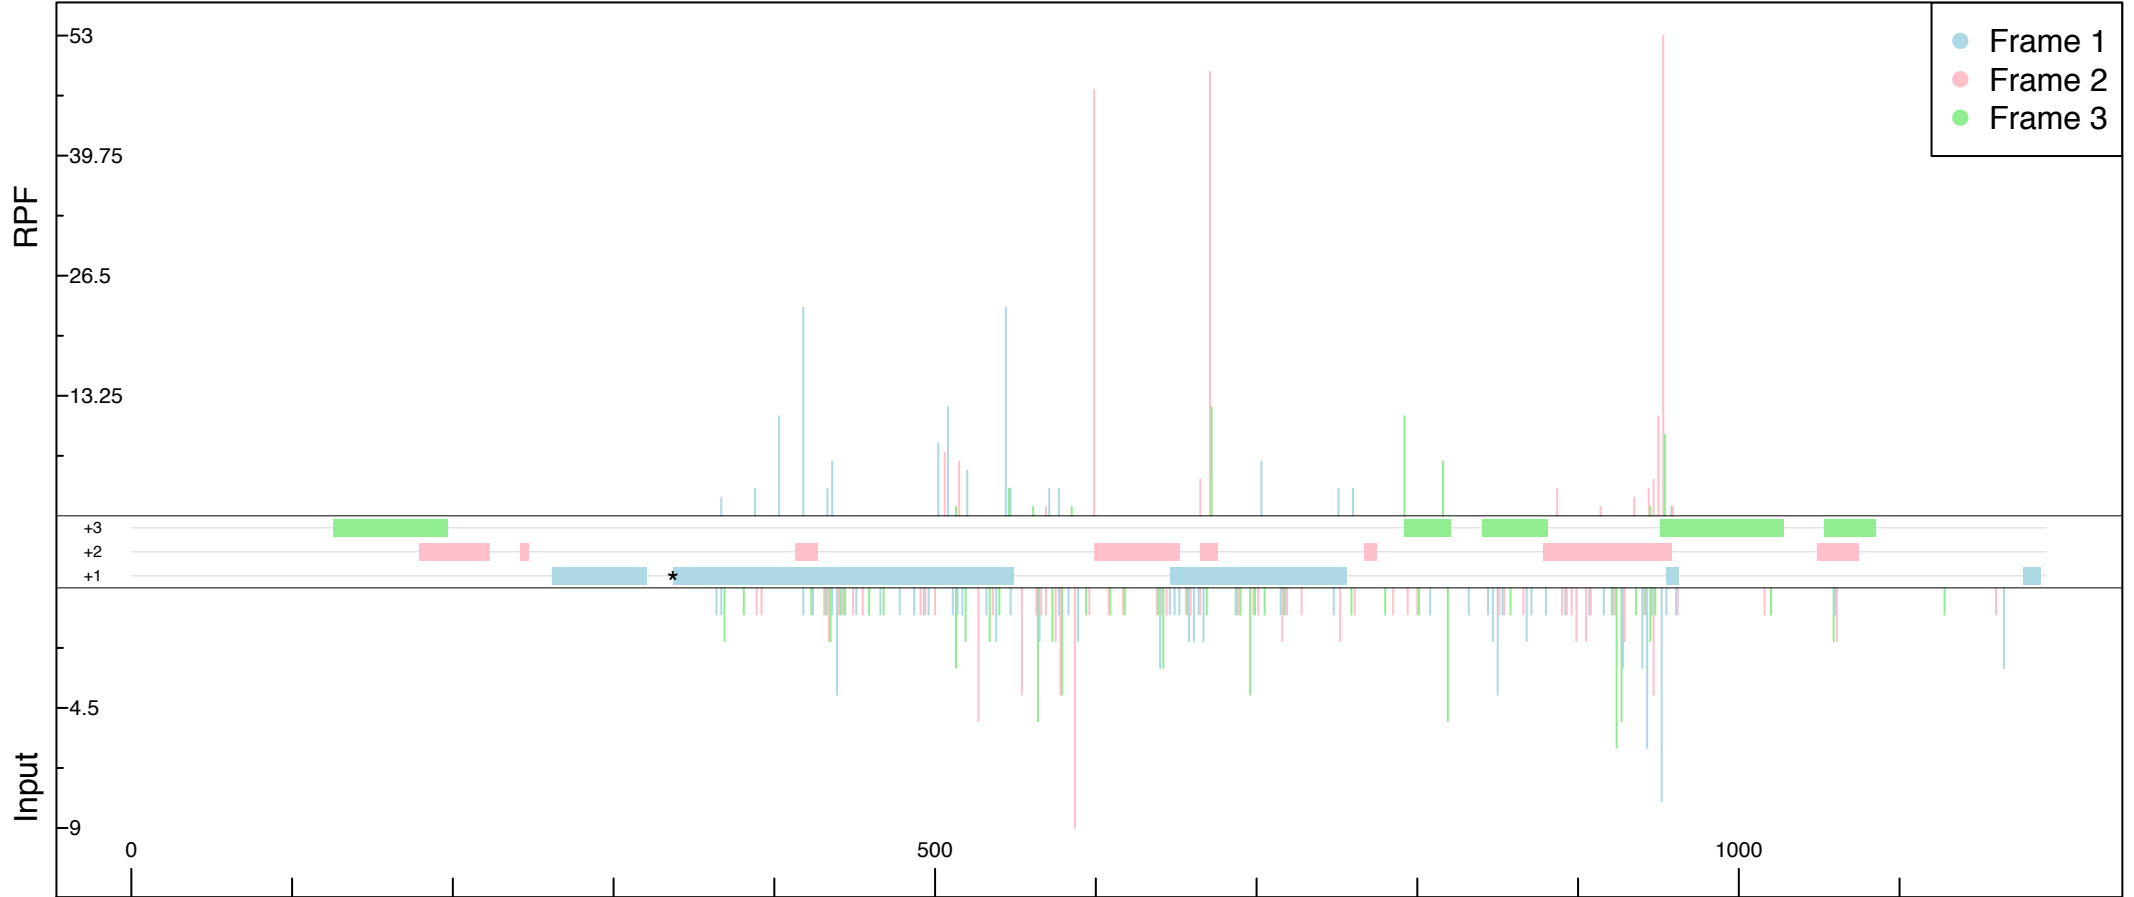

\*MLAIPRFIAIPRFTAVFHKMQKLLTYEFILTKELFTALQLNSHNLTELHNCPTQISVEAGTSSCVQQRQS

# ENSDART00000151290, Global

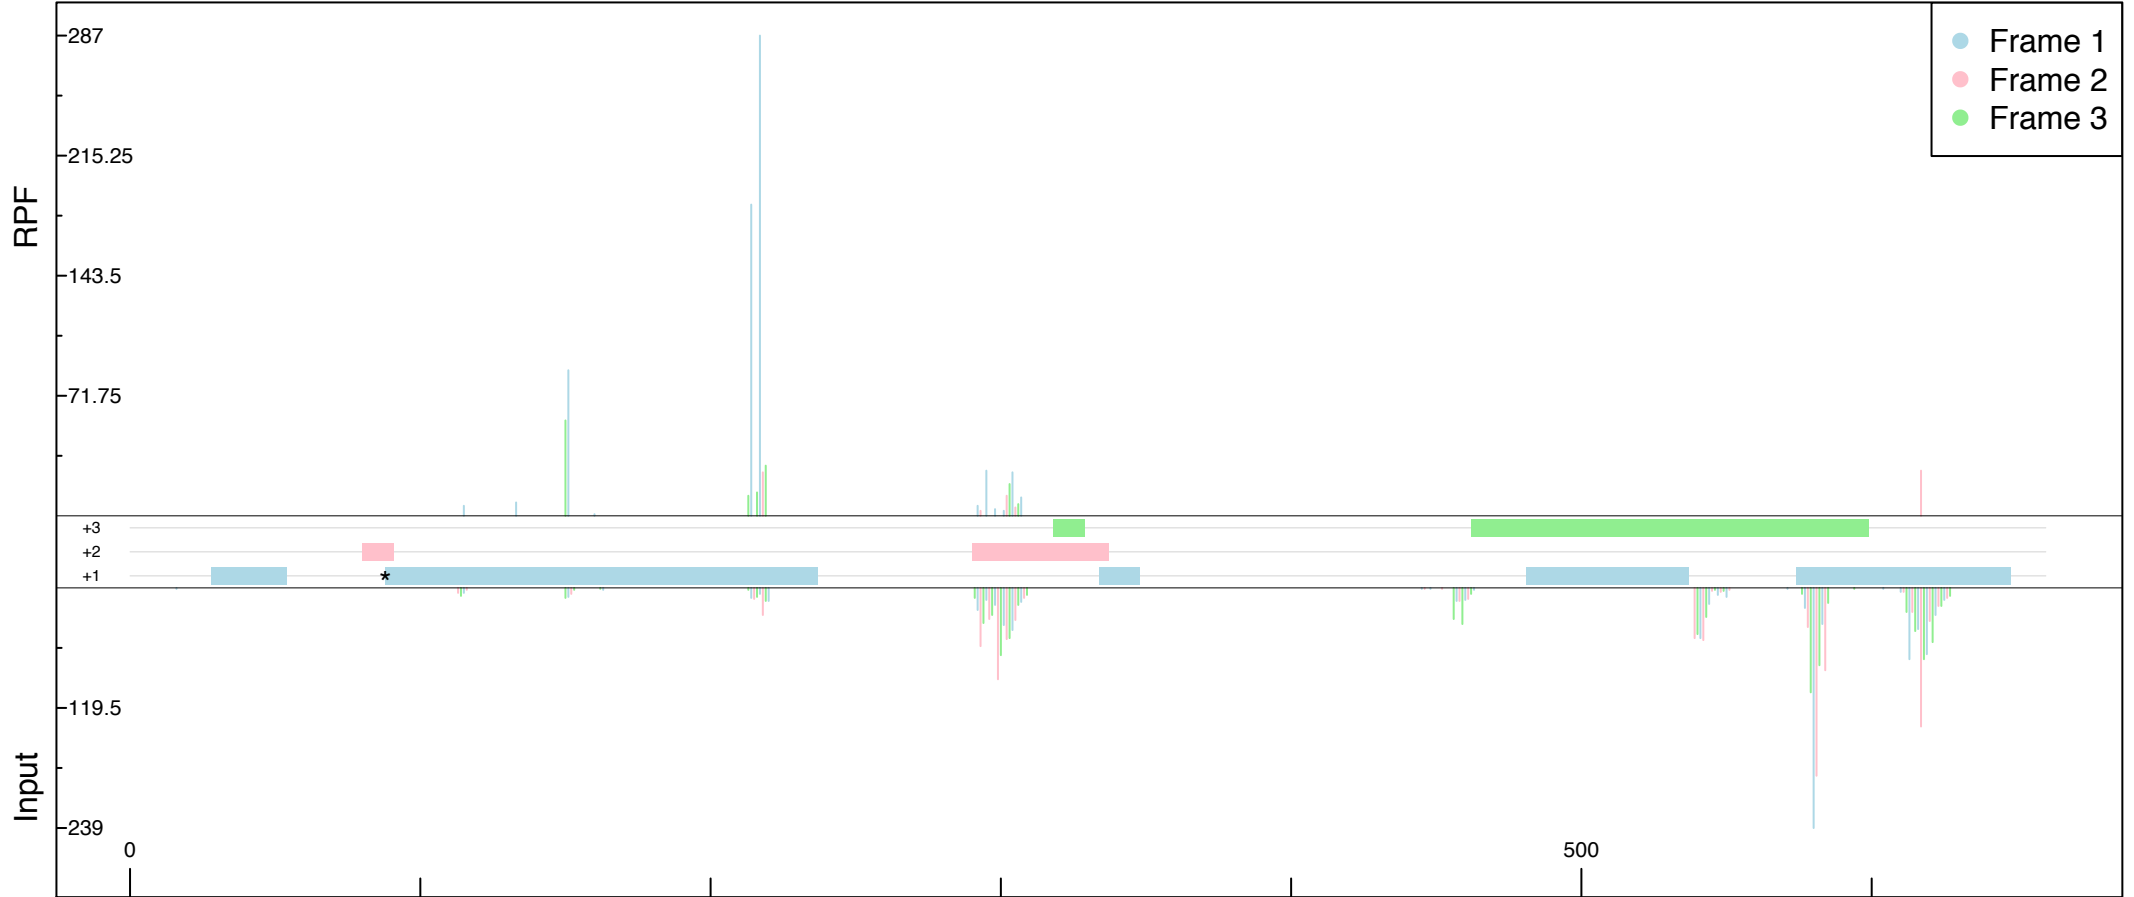

\*MKT LGVGLATRQVANMIKPTTIISKEGDVFTIKTASTFKSTEINFKLGE

# linc-ankha, Global

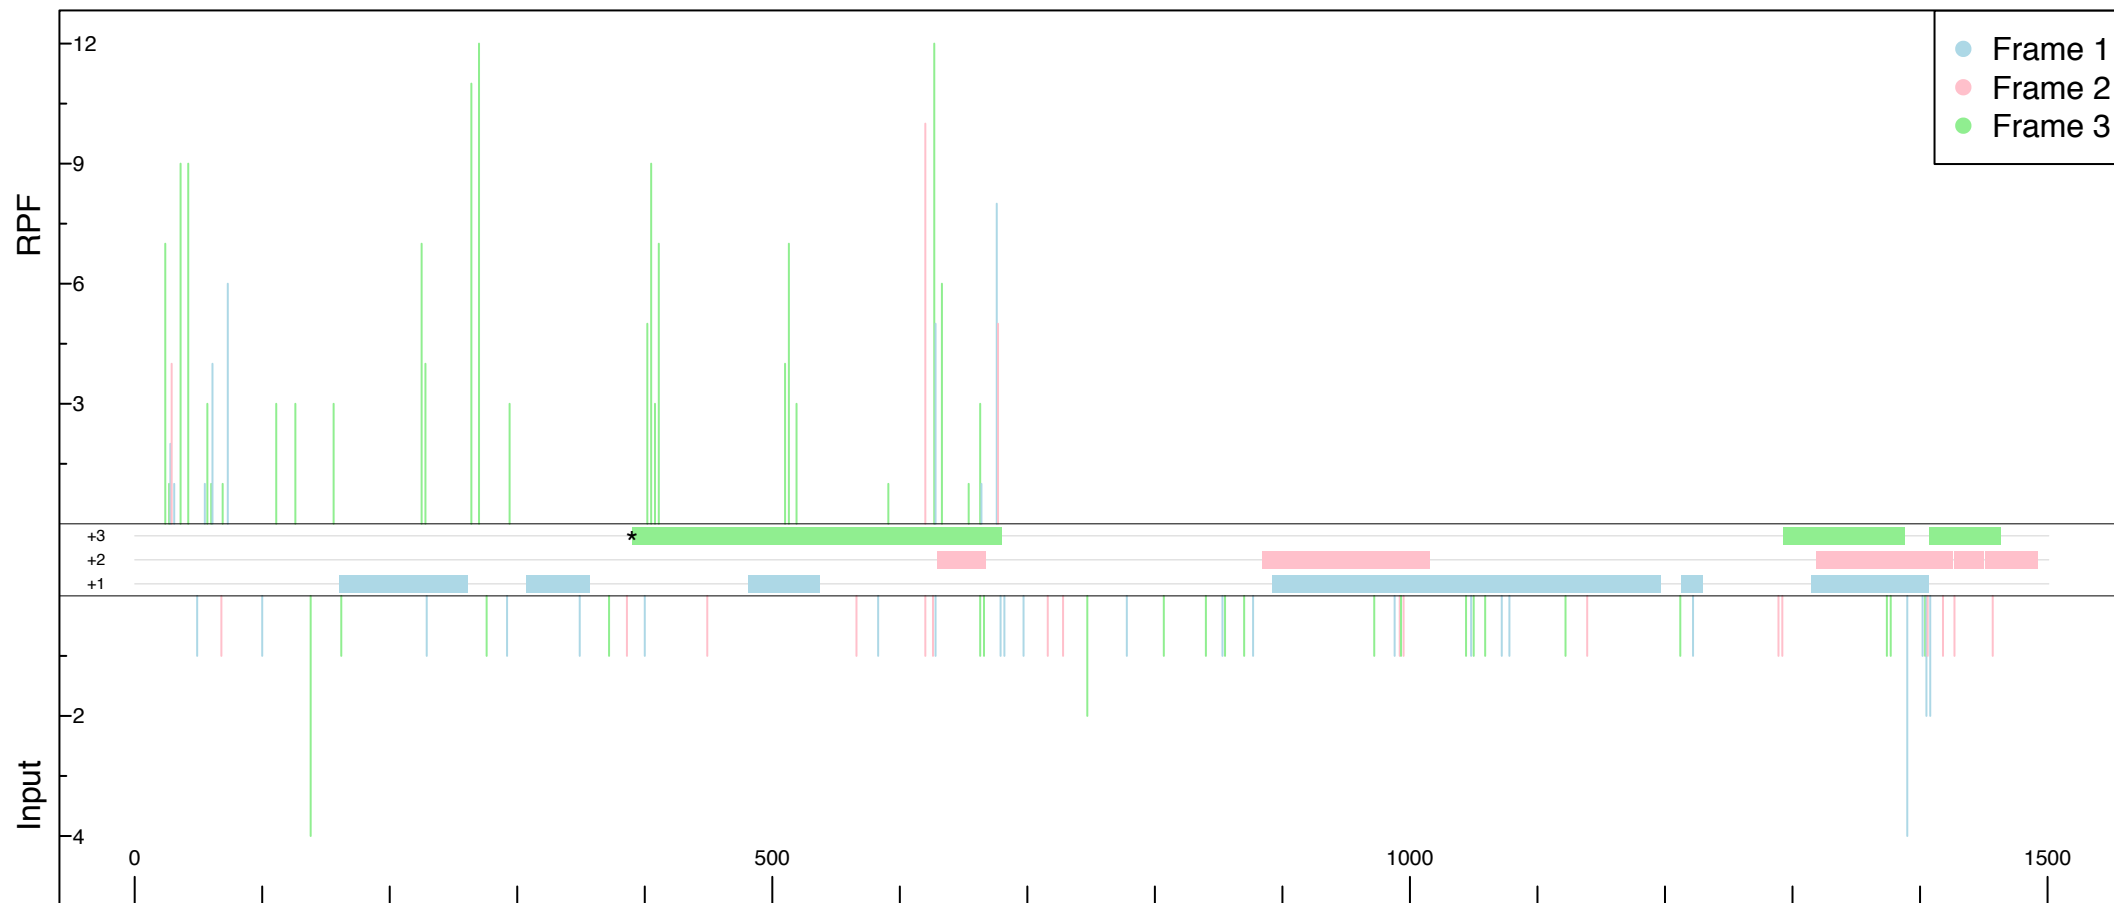

\*MMVYWSLAQKKGHTAGMEASQSHQSRSLPLIDEFFLYCCHVSAGLKEKMLADIFKISLSTVSRVITWANYLYLIFGSLPWMSRKQVNSTMPEKFR

# ENSDART00000147716, Global

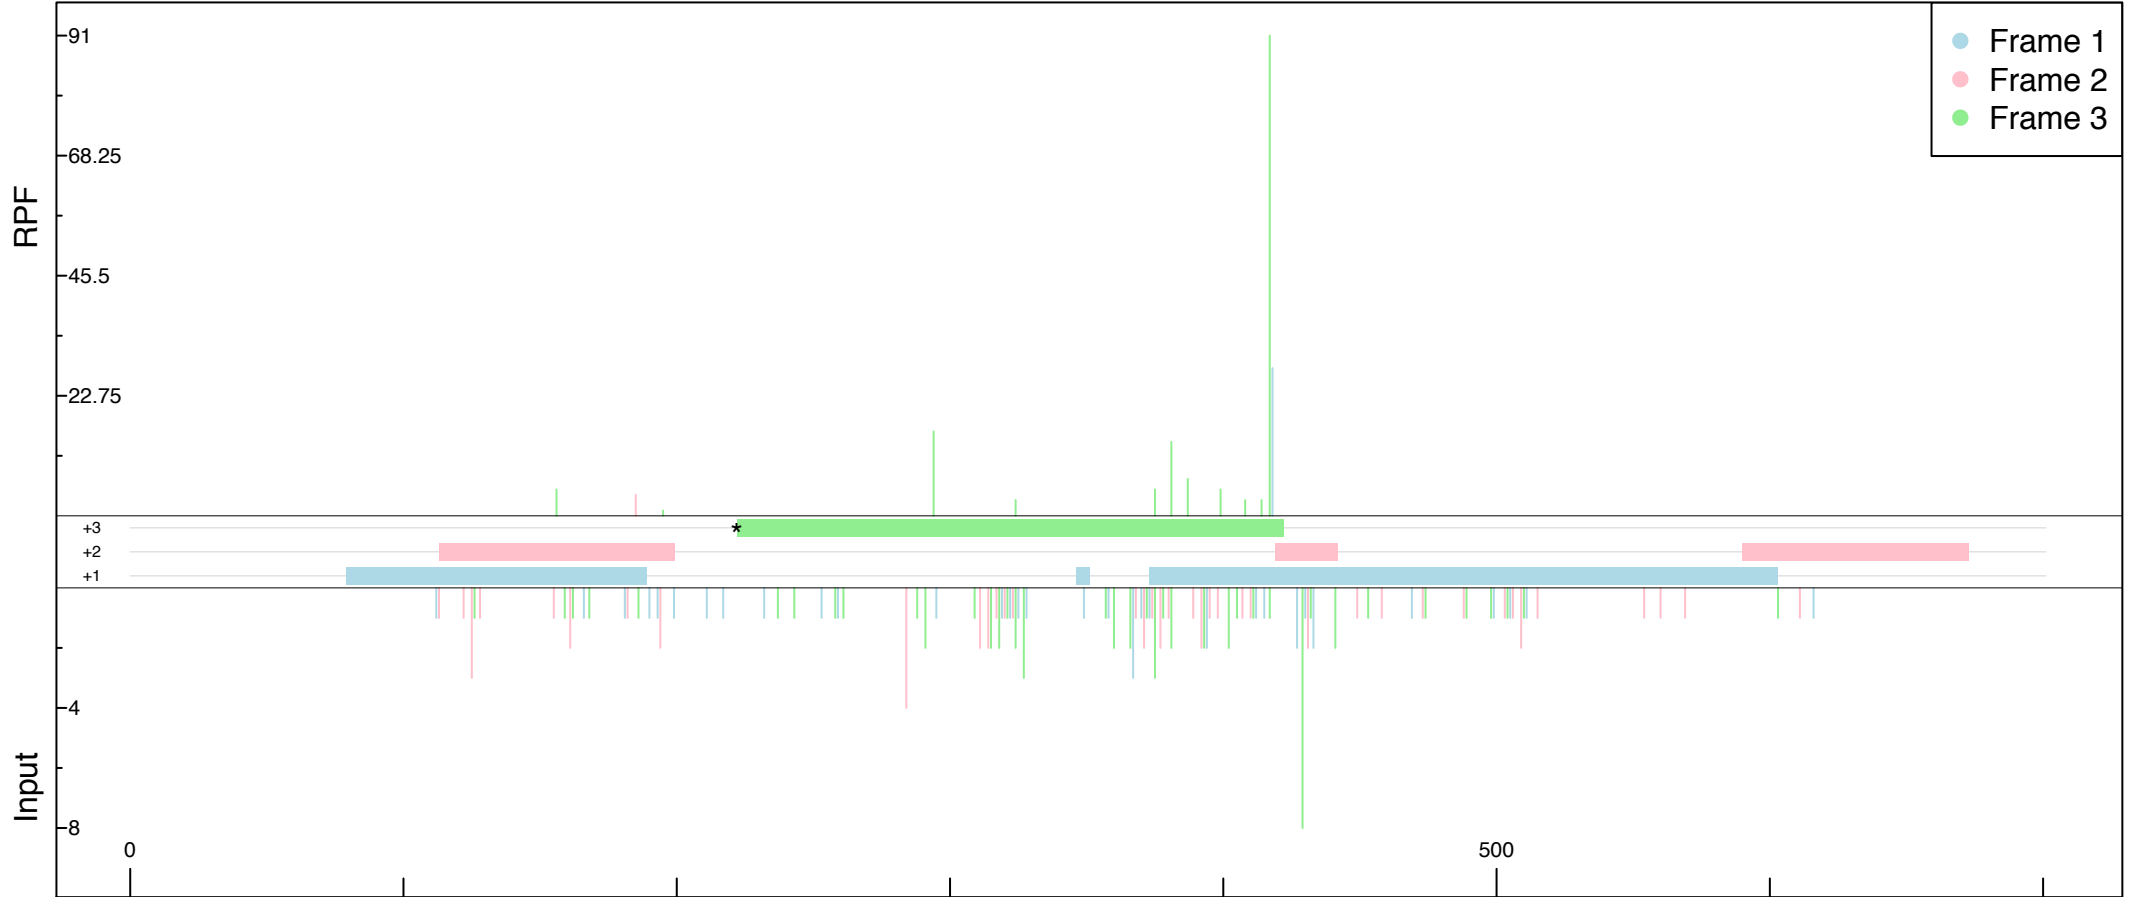

\*MPKKSQLDHRKSKNLKSKPKSKDSGEMNTEKLMRRNSKEEFDVNFSDPADESRSGPQEKLQDEKT

# ENSDART00000149894, Global

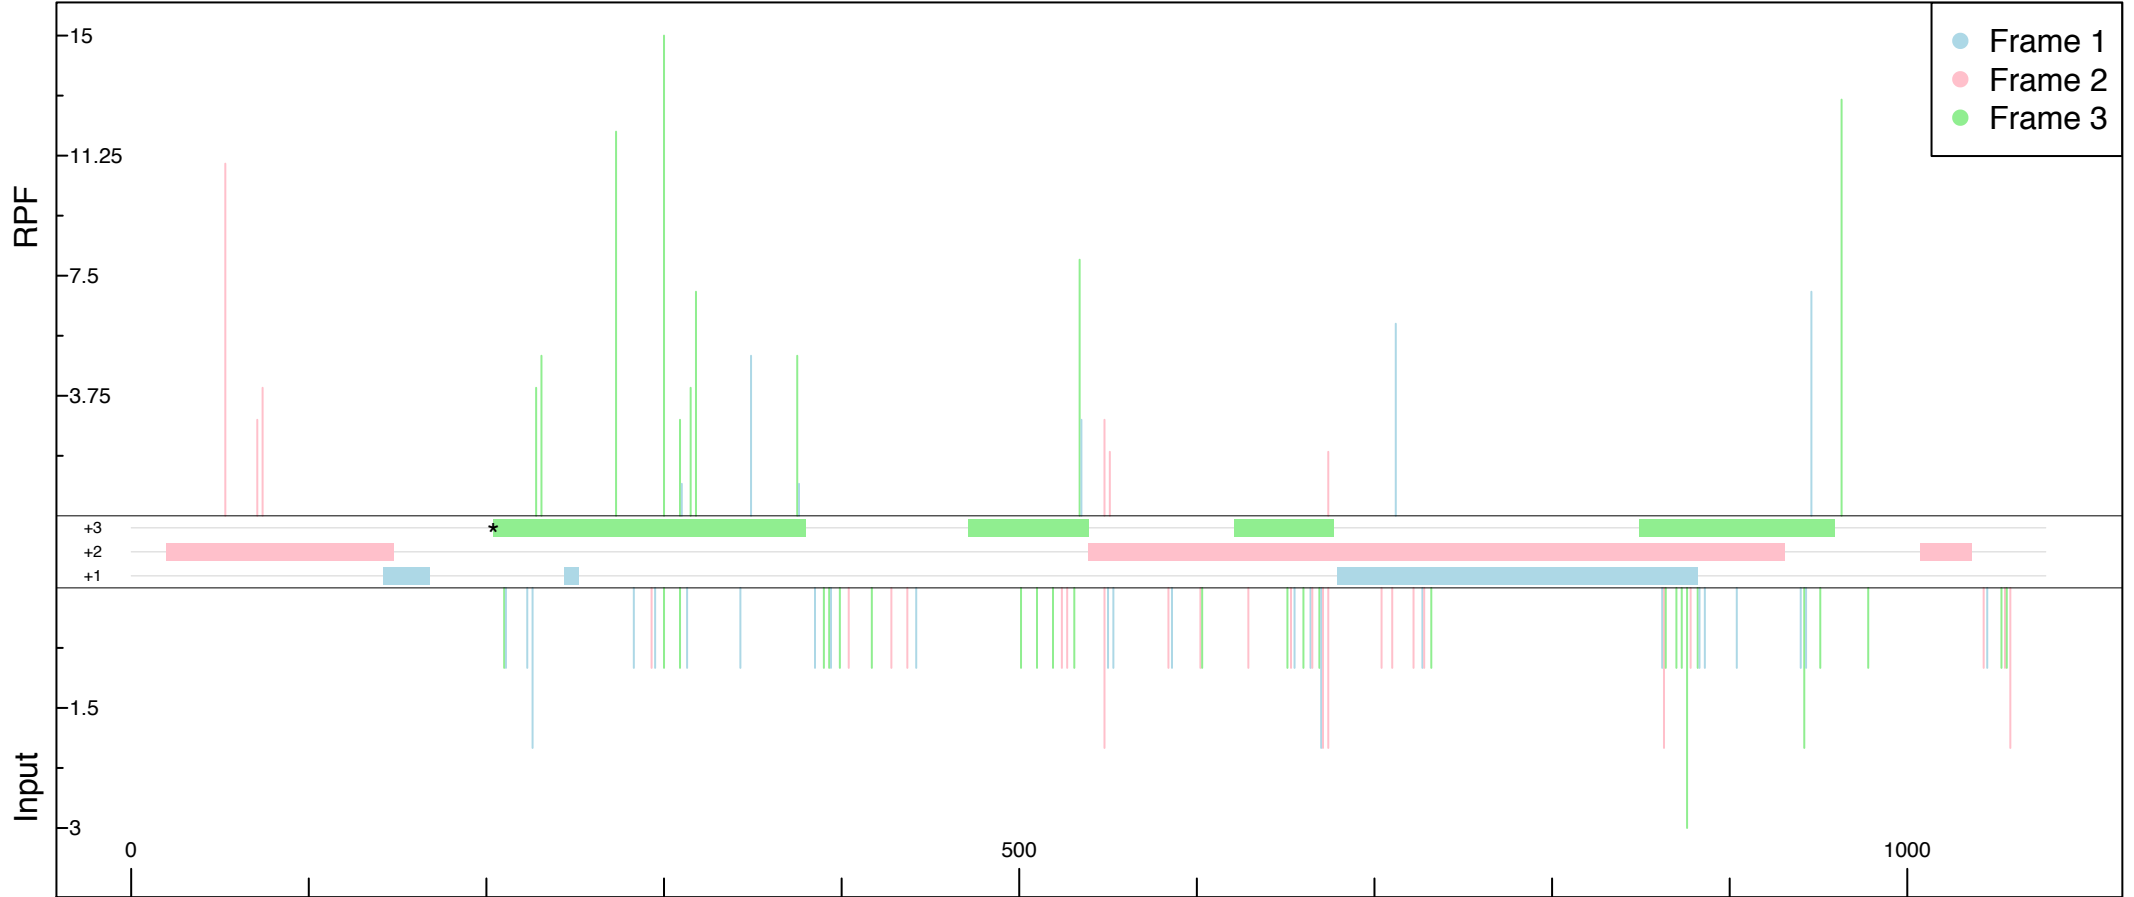

\*MDQRLLLRVIIAEDDITLSSPTTTLDTEGSTADTEILSPVGASPSLRQQWPEFFDIPN

ENSDART00000141136, Global

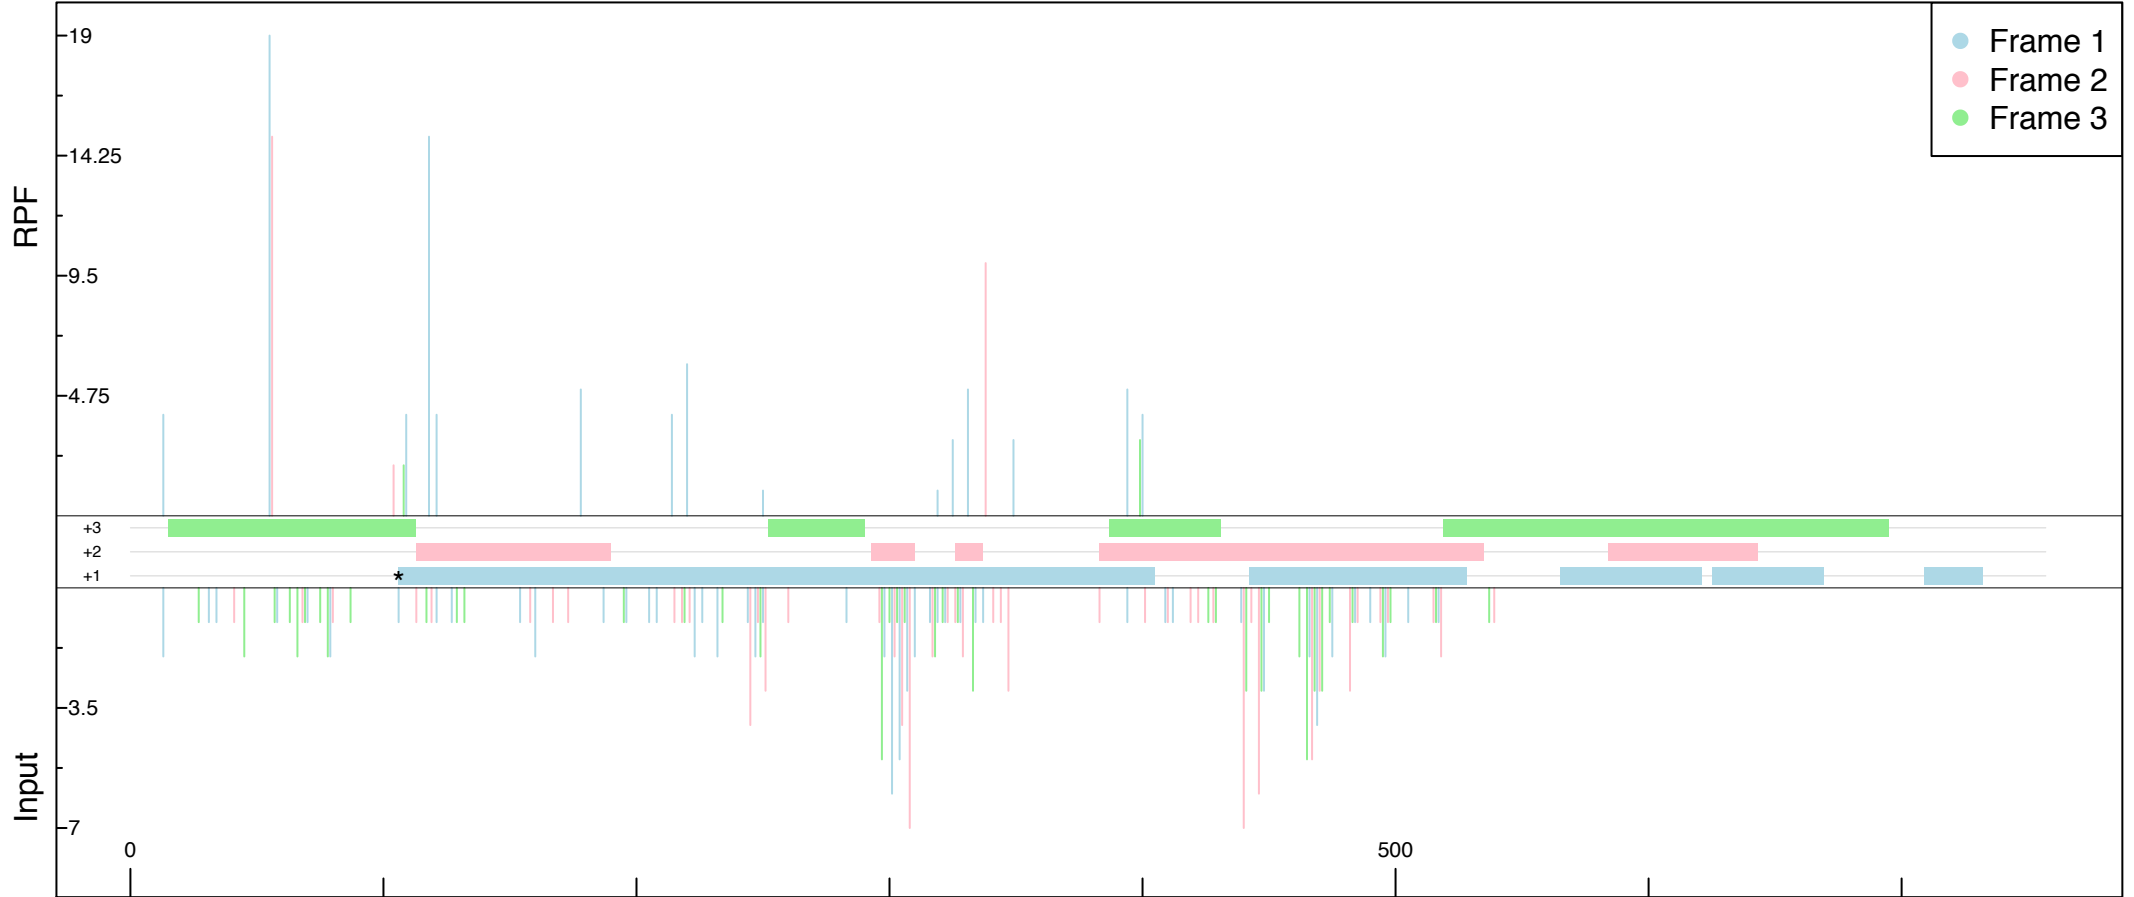

\*MSDDHGPGGNKASDATSTTQQQAISDFLRSSKYKTESKEQQTKEQAIARWIGRTGLTLTTIEDEDFVLMGMIDGRLTVPKTKISNLIKTLYECCTLS



linc-loc555288, Global

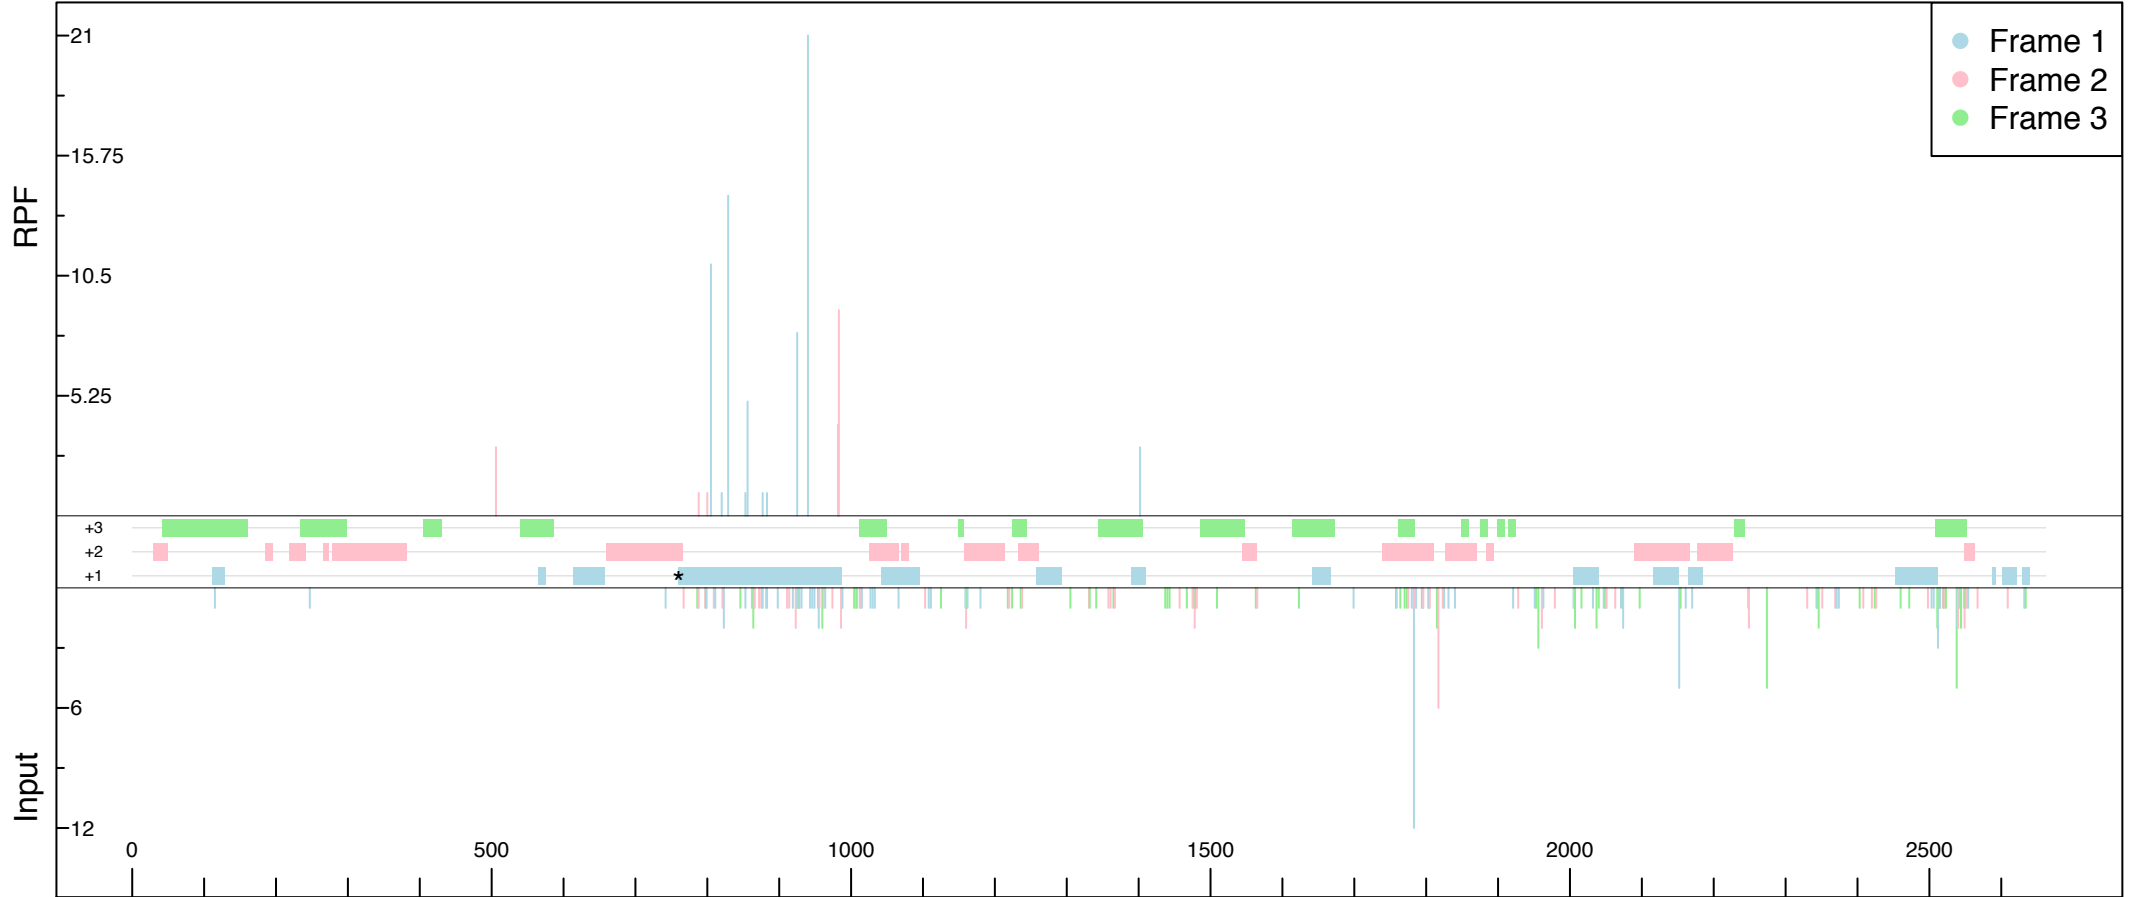

\*MVKLISLLILVIQNASLILSIRLVWNLVEDHFLGSA AFLMAEIVKVF SCLFIIMMQSSETSSYGI AWVGKTVSL

ENSDART00000134057, Global

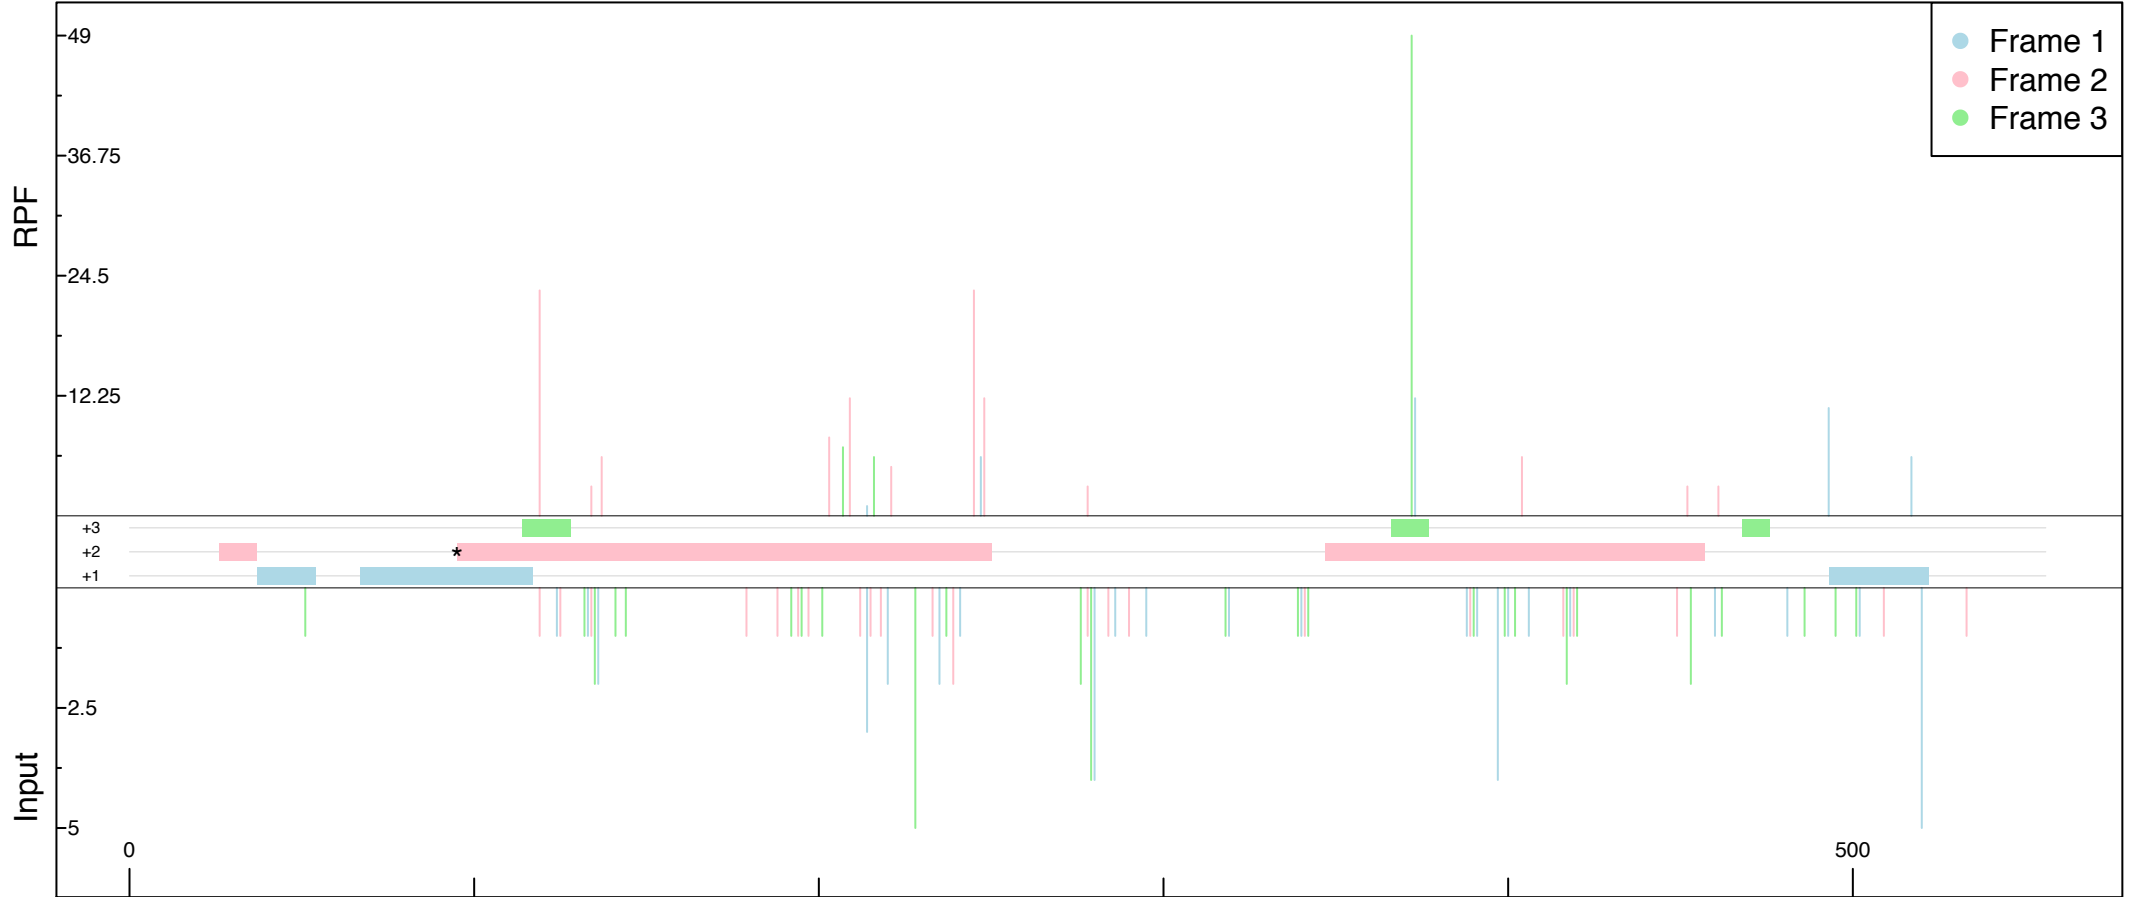

\*MQKLLTYEFILTKELFTALHLNSHNLTELHNCPTQISVEAGTSSCVQQRQS

# ENSDART00000138418, Global

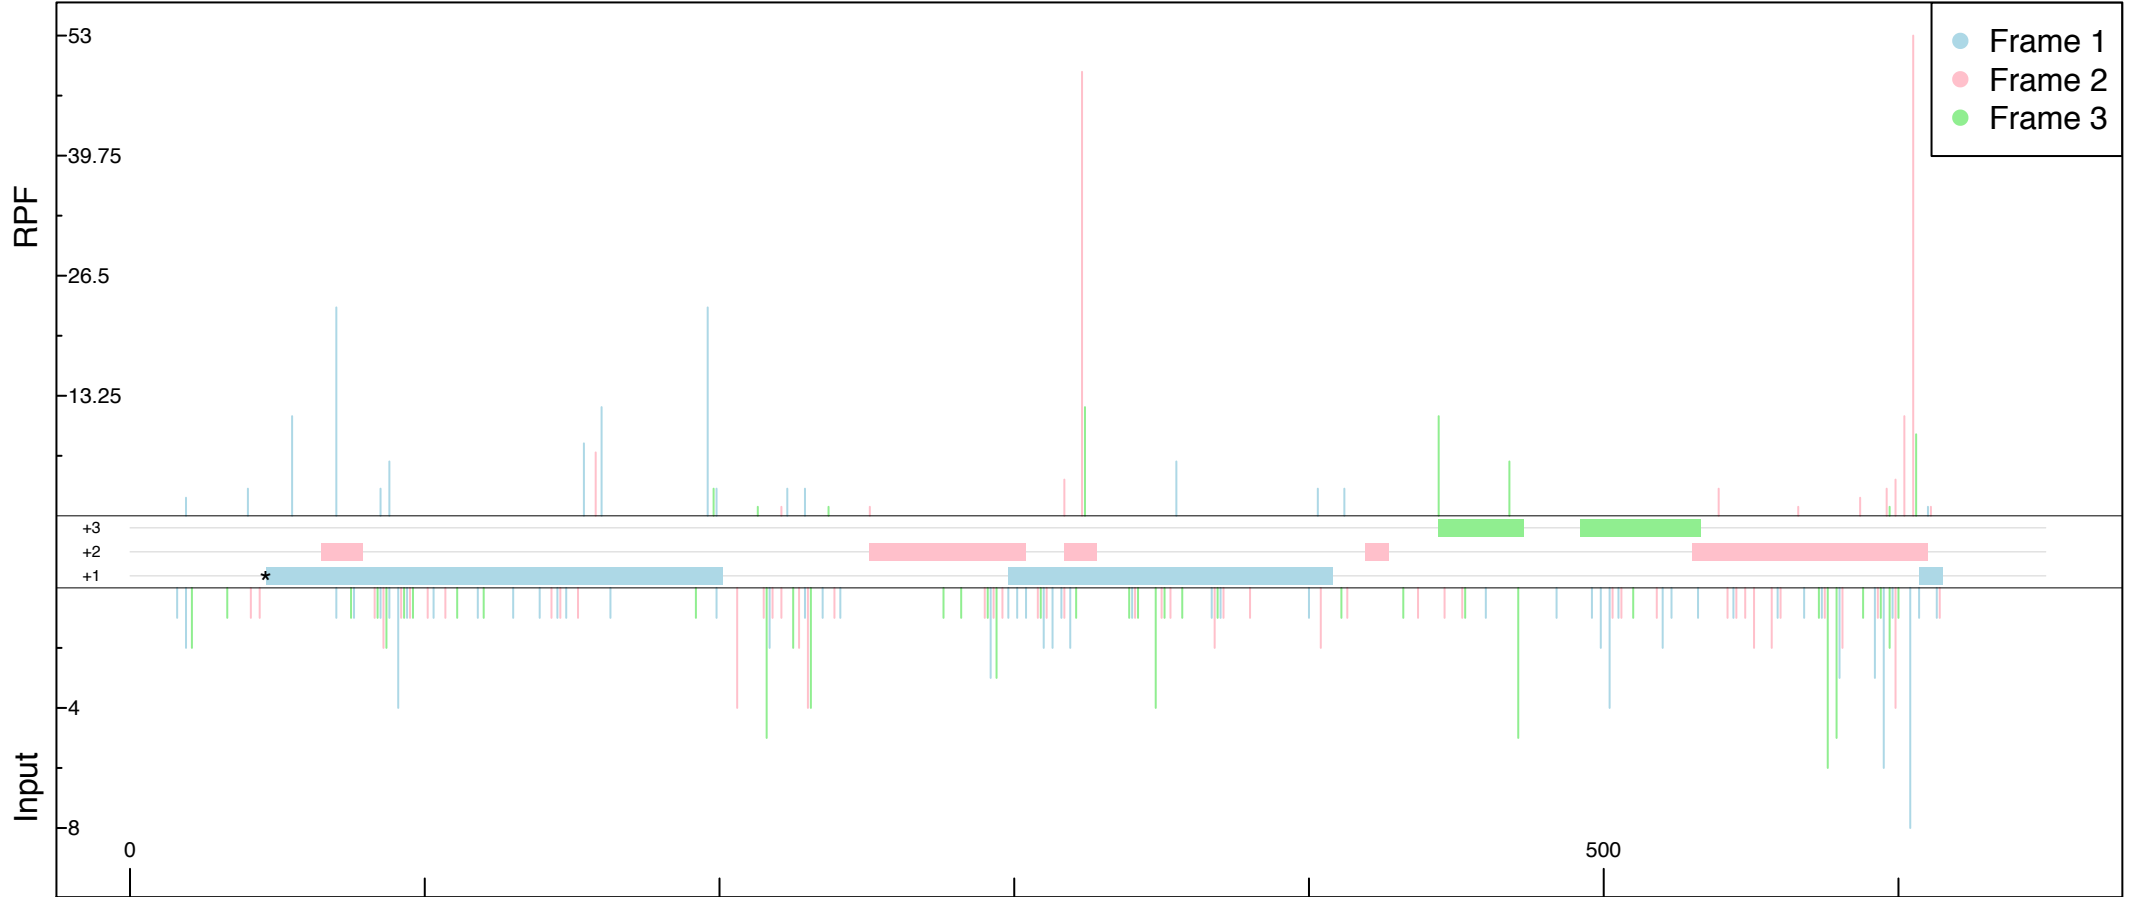

\*MQKLLTYEFILTKELFTALQLNSHNLTELHNCPTQISVEAGTSSSVQQRQS

# ENSDART00000132517, Global



\*MQKLLTYEFILTKELFTALHLNSHNLTELHNCPTQISVEAGTSSCVQQRQS

ENSDART00000133634, Global

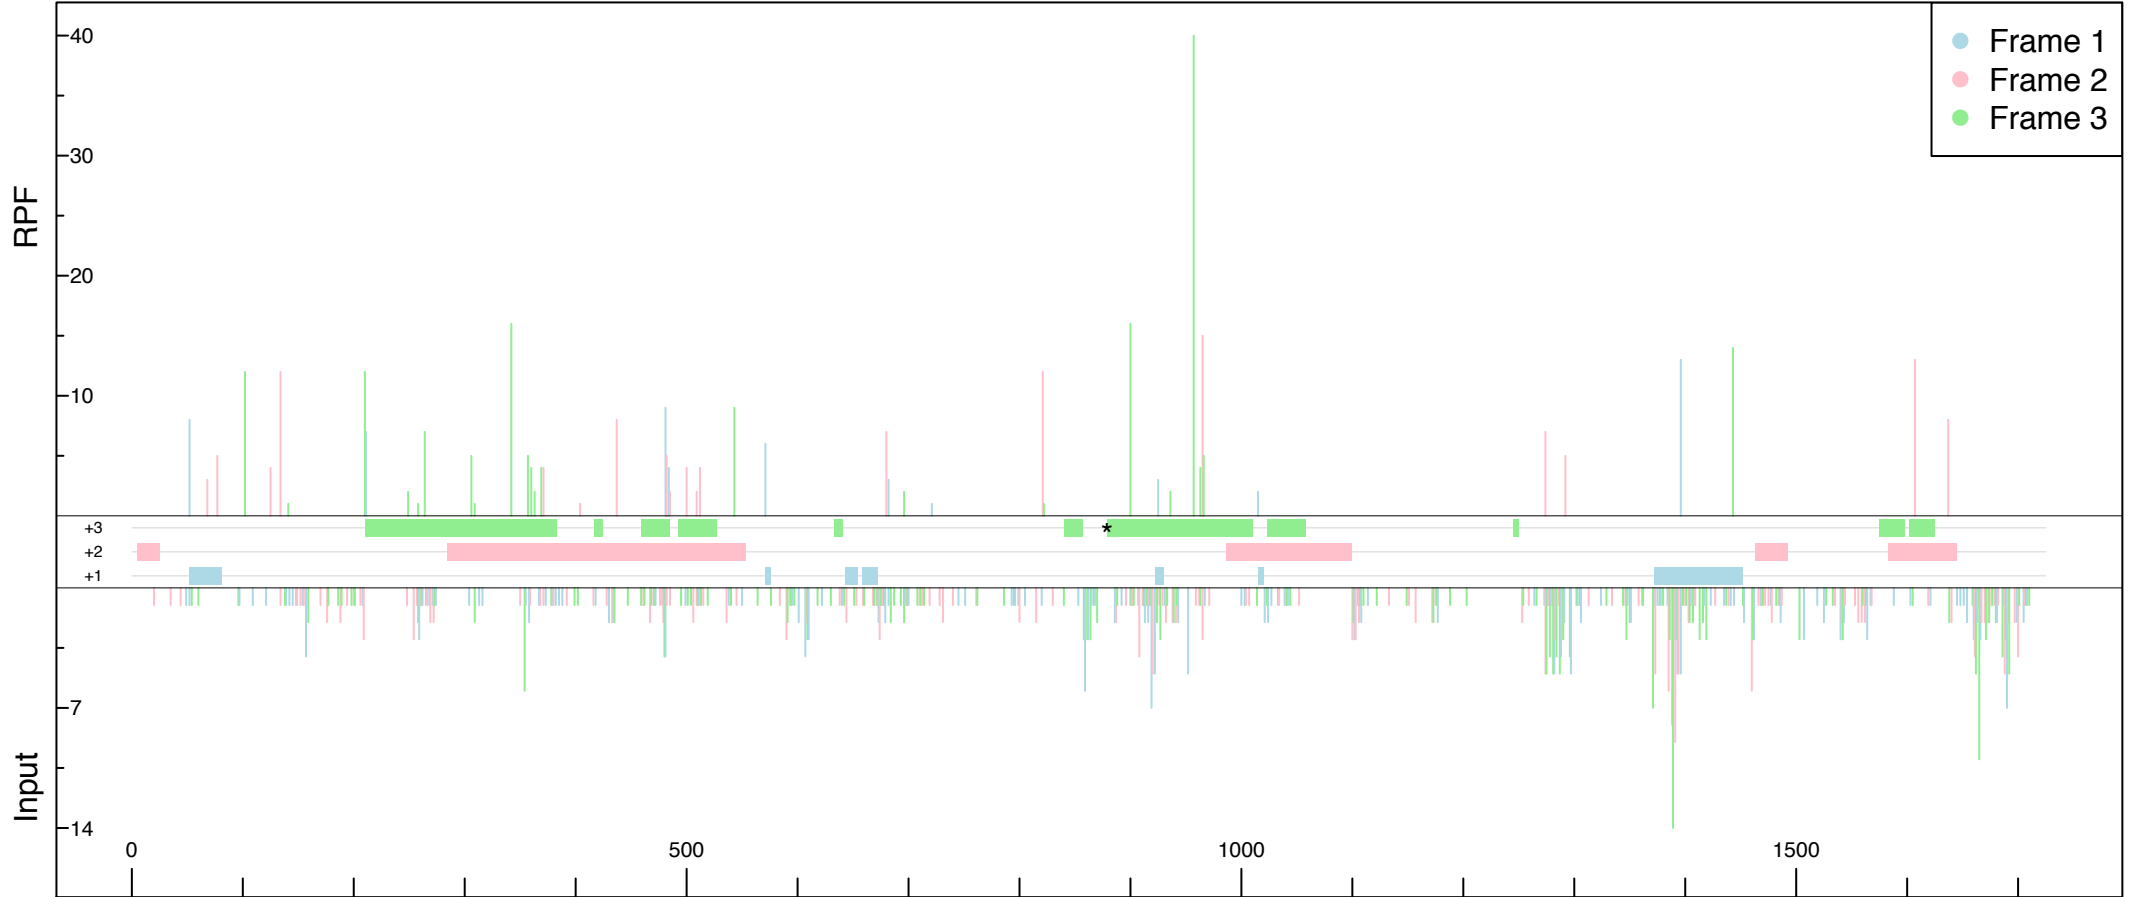

\*MMSAPLRHCIRRGHNEMTSLKELQSKFKQRGTMCKTWNYYNSC

linc-wrb, Global

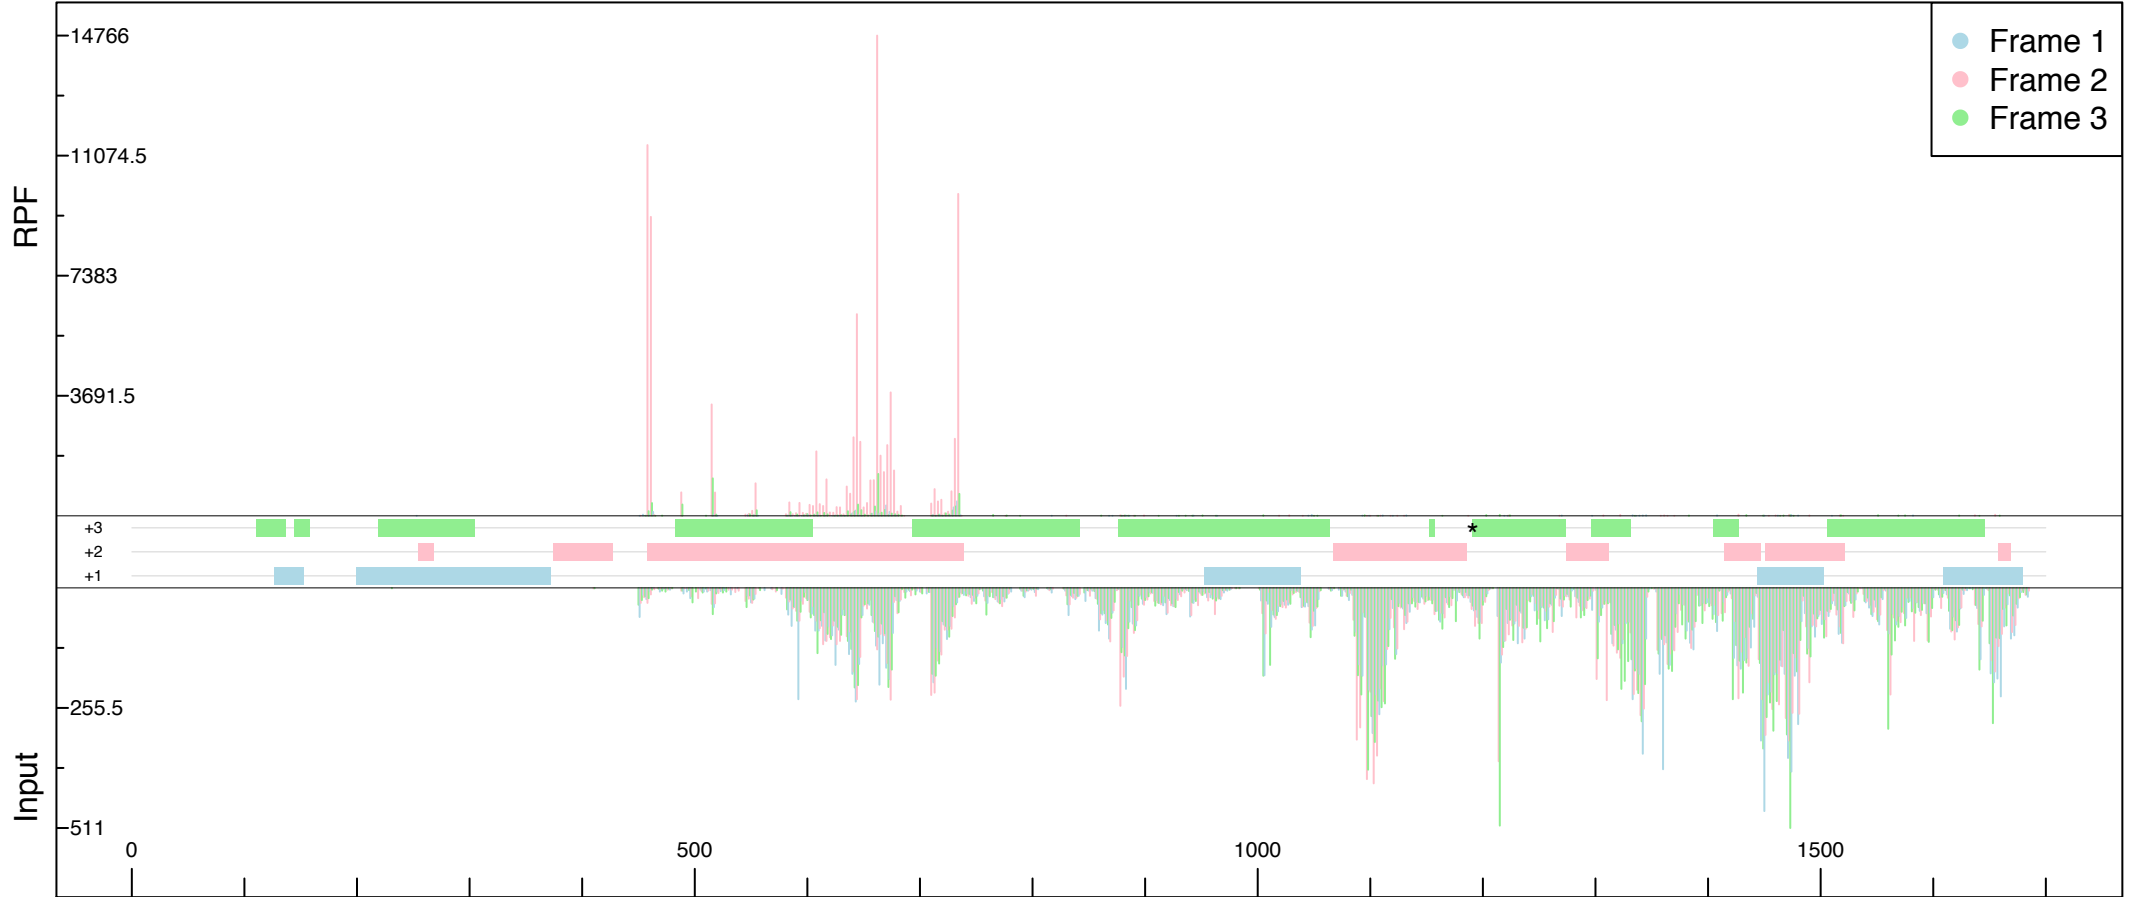

\*MLFVFLGGMGLIVSCVLQIETSLFKPF

Zv9\_00030125, Global

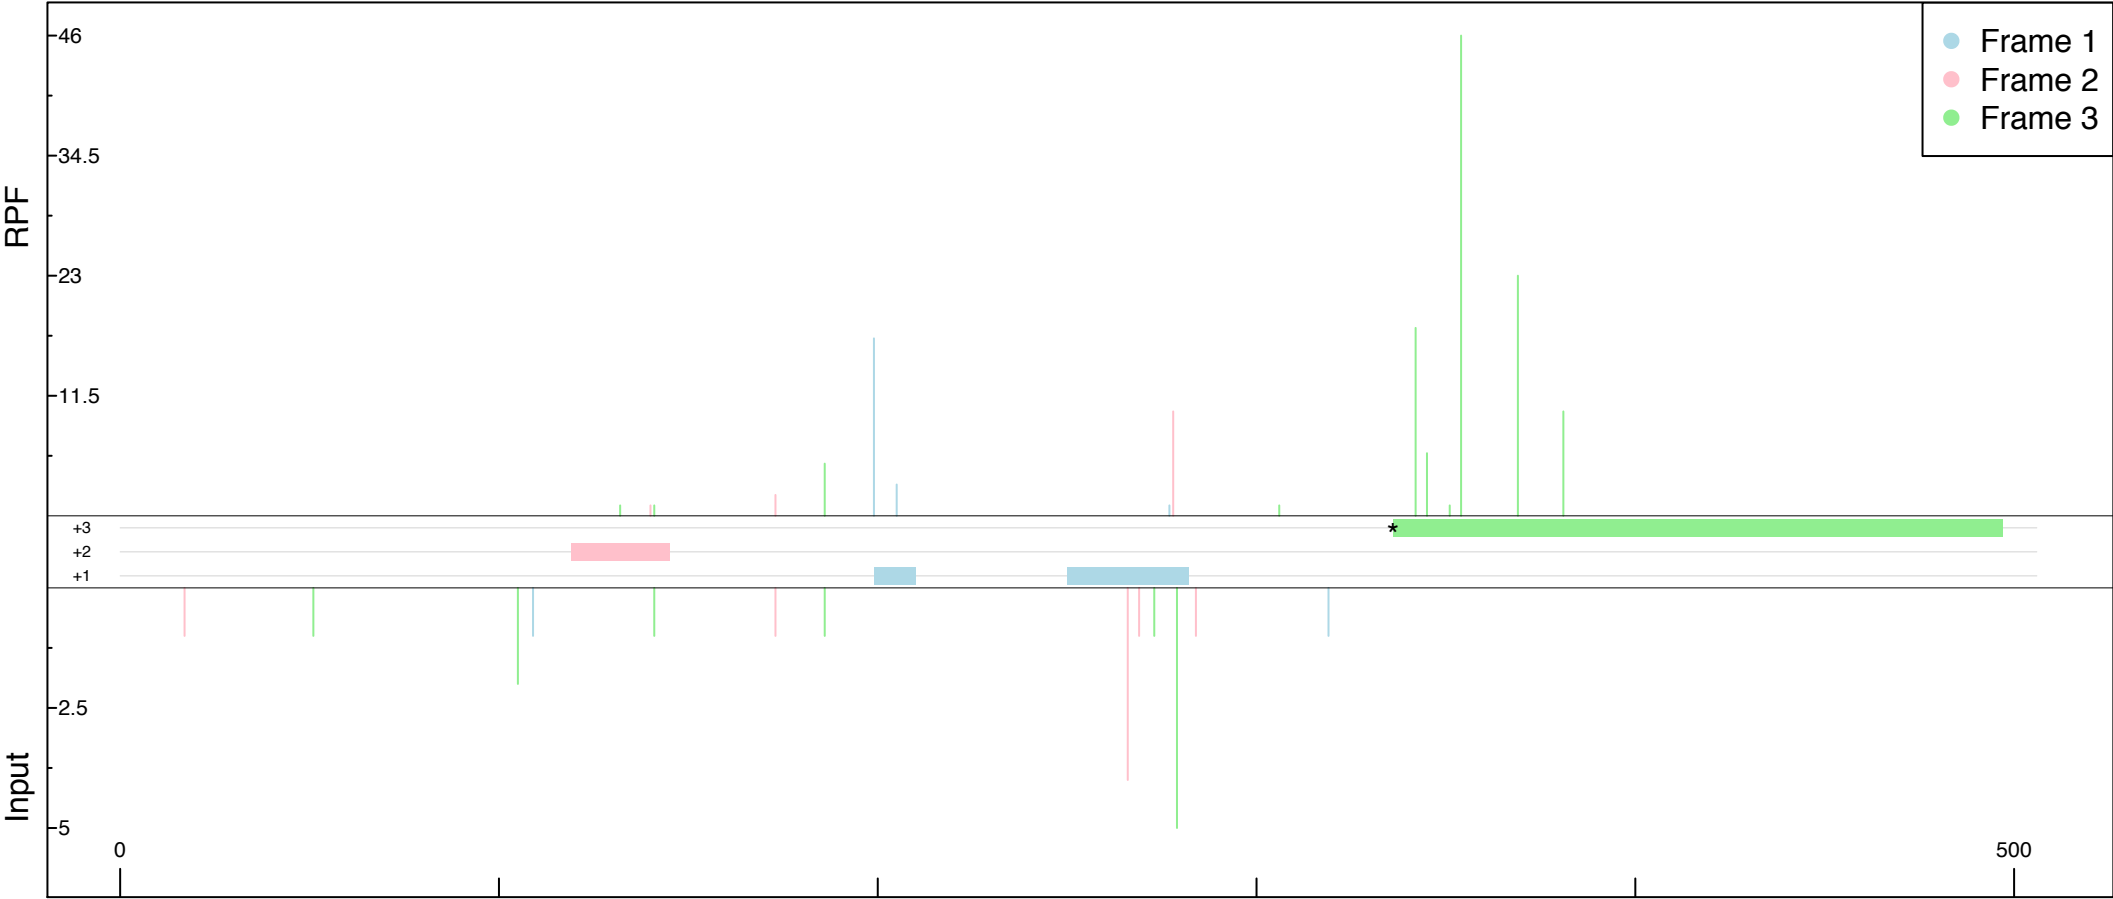

\*MALTDKHKVKRQRLDRICGQTLFFCSETLEV FYLQAKISVNYIIISINNHP

ENSDART00000132707, Global

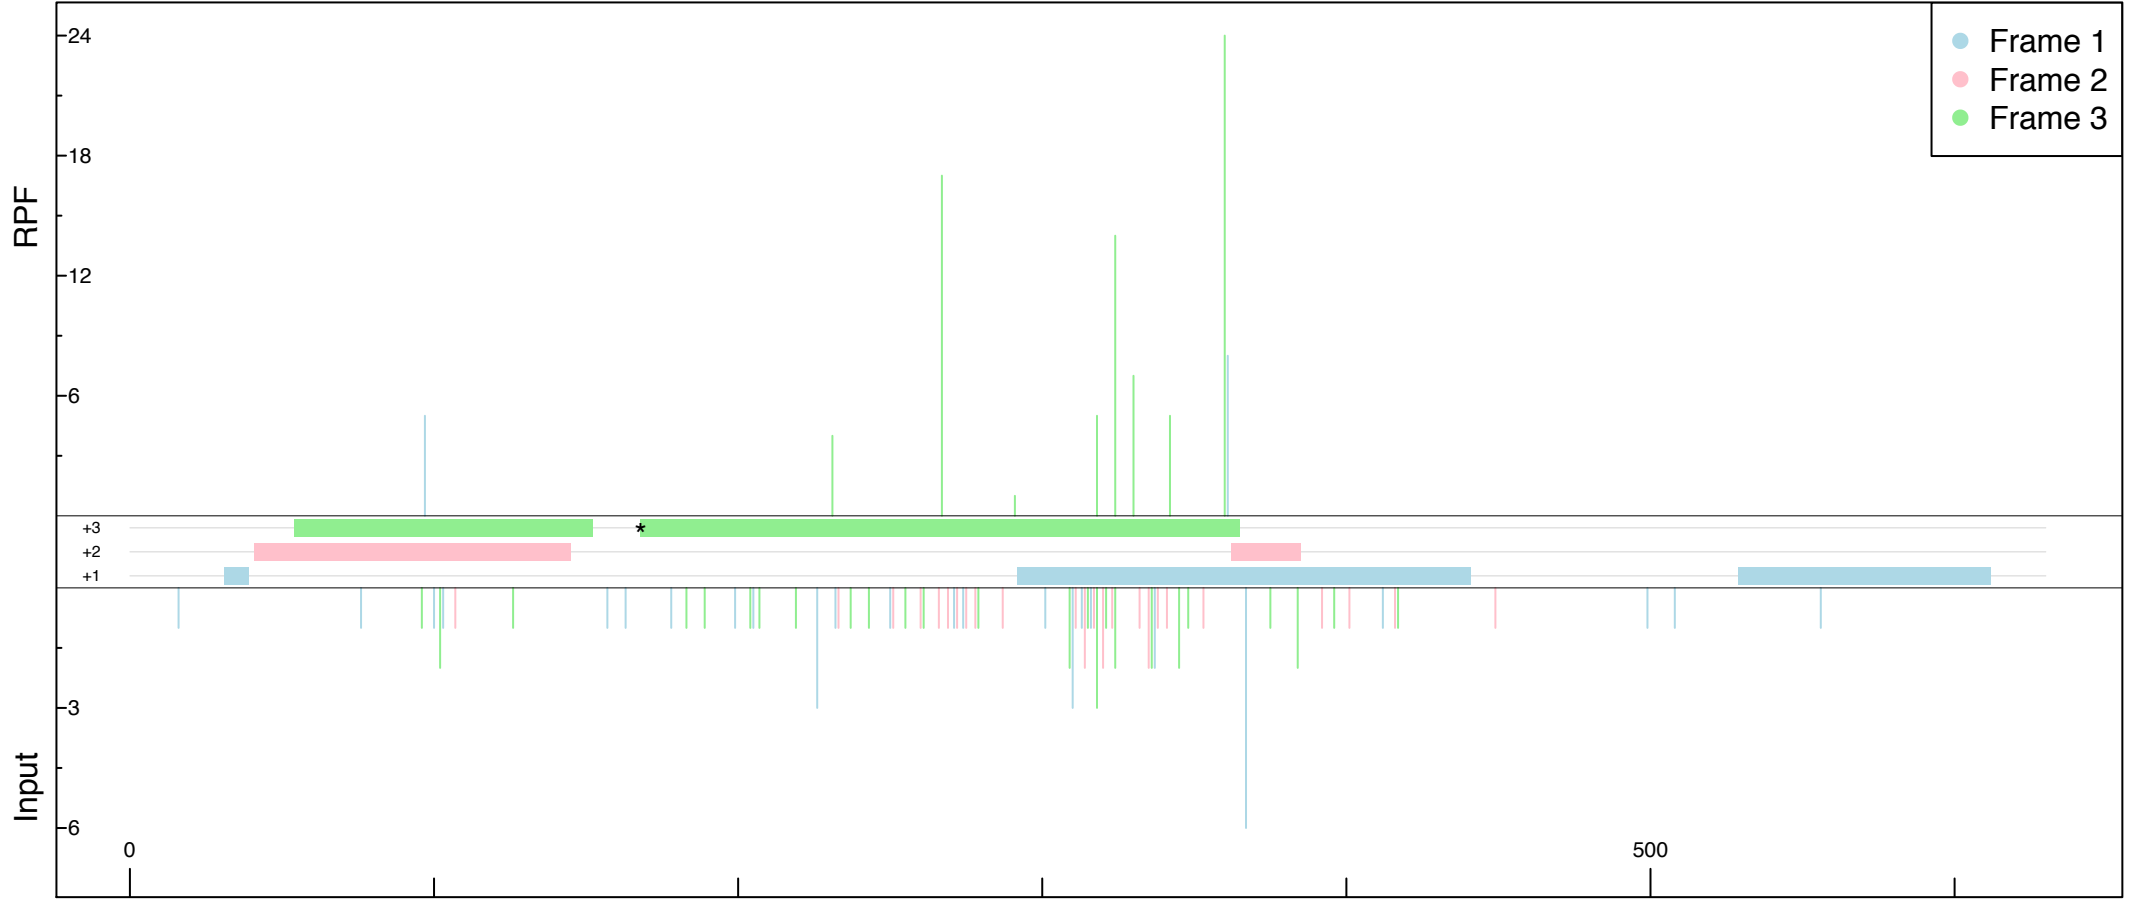

\*MPKKSQLDHRKSKNLKSKPKSNDSGEMNTEKLMRRHSHKESYDFSRDPADESRSRSGPQEKLQDEKT



ENSDART00000137173, Global

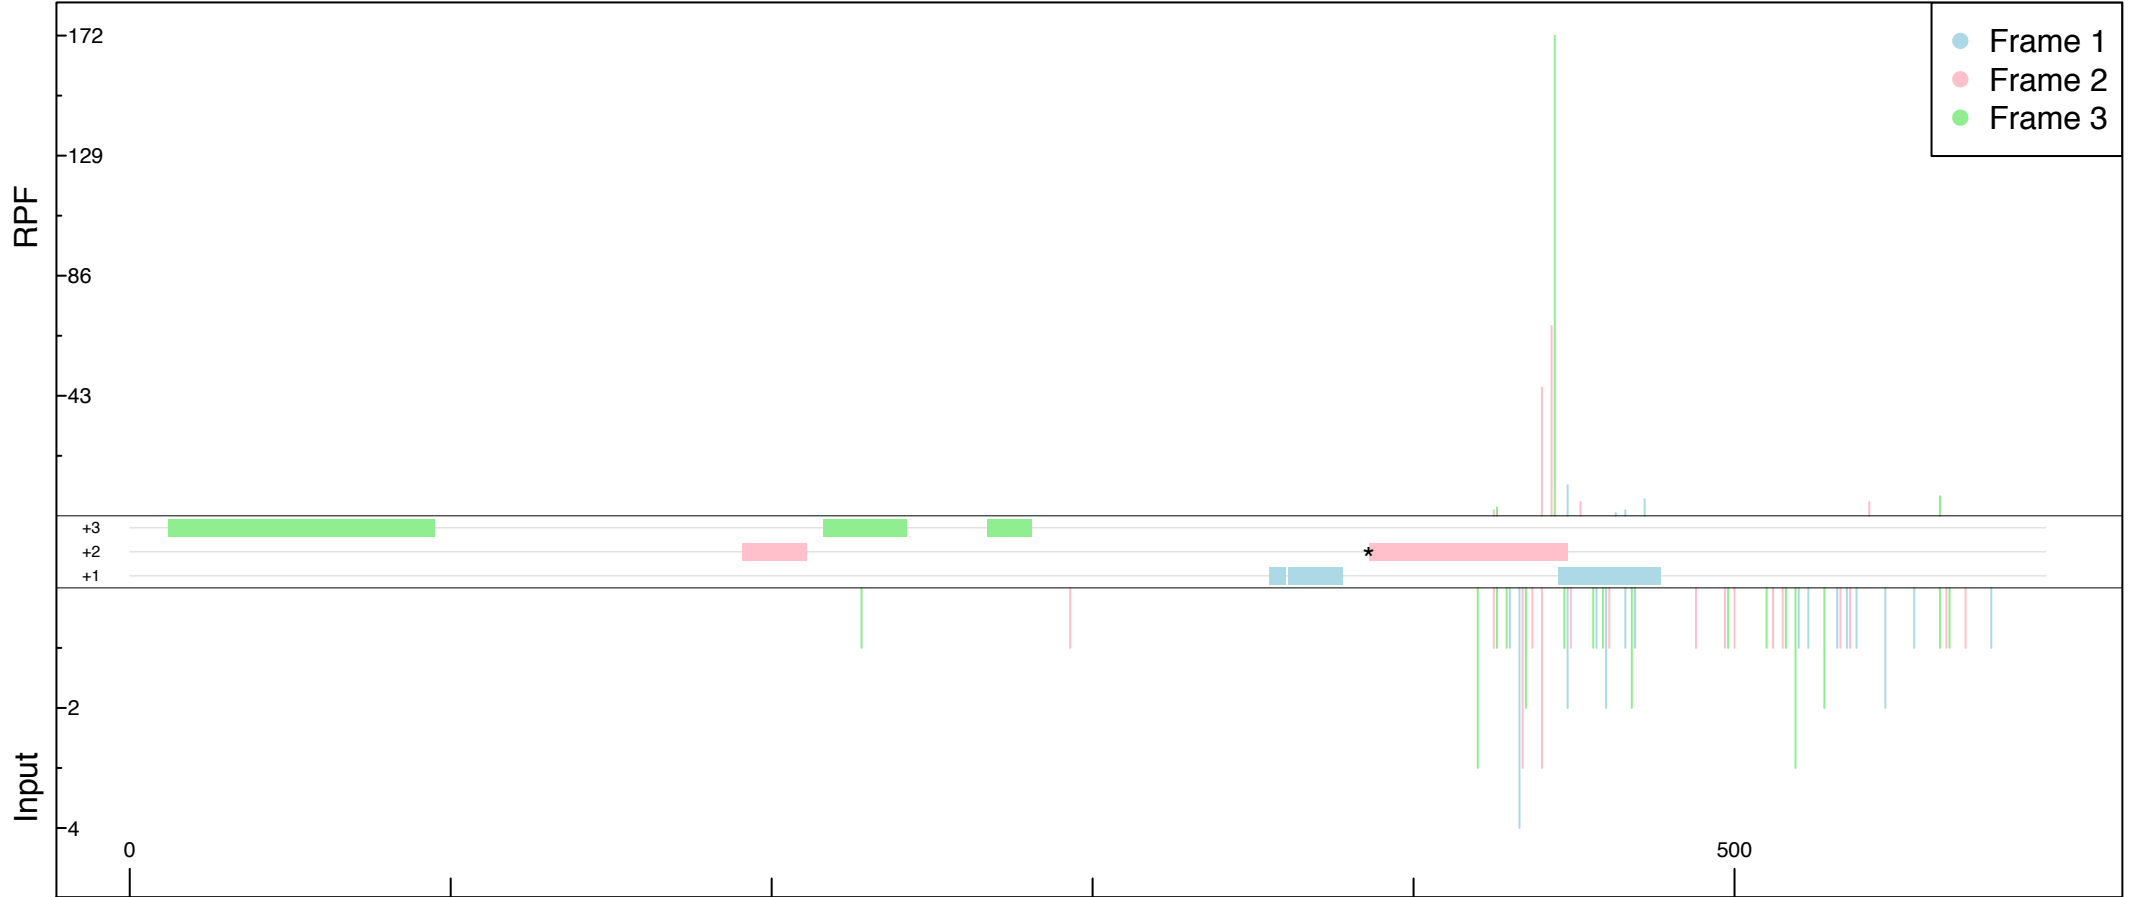

\*MYIFVTVDCRKIKARPTRMR

ENSDART00000144717, Global

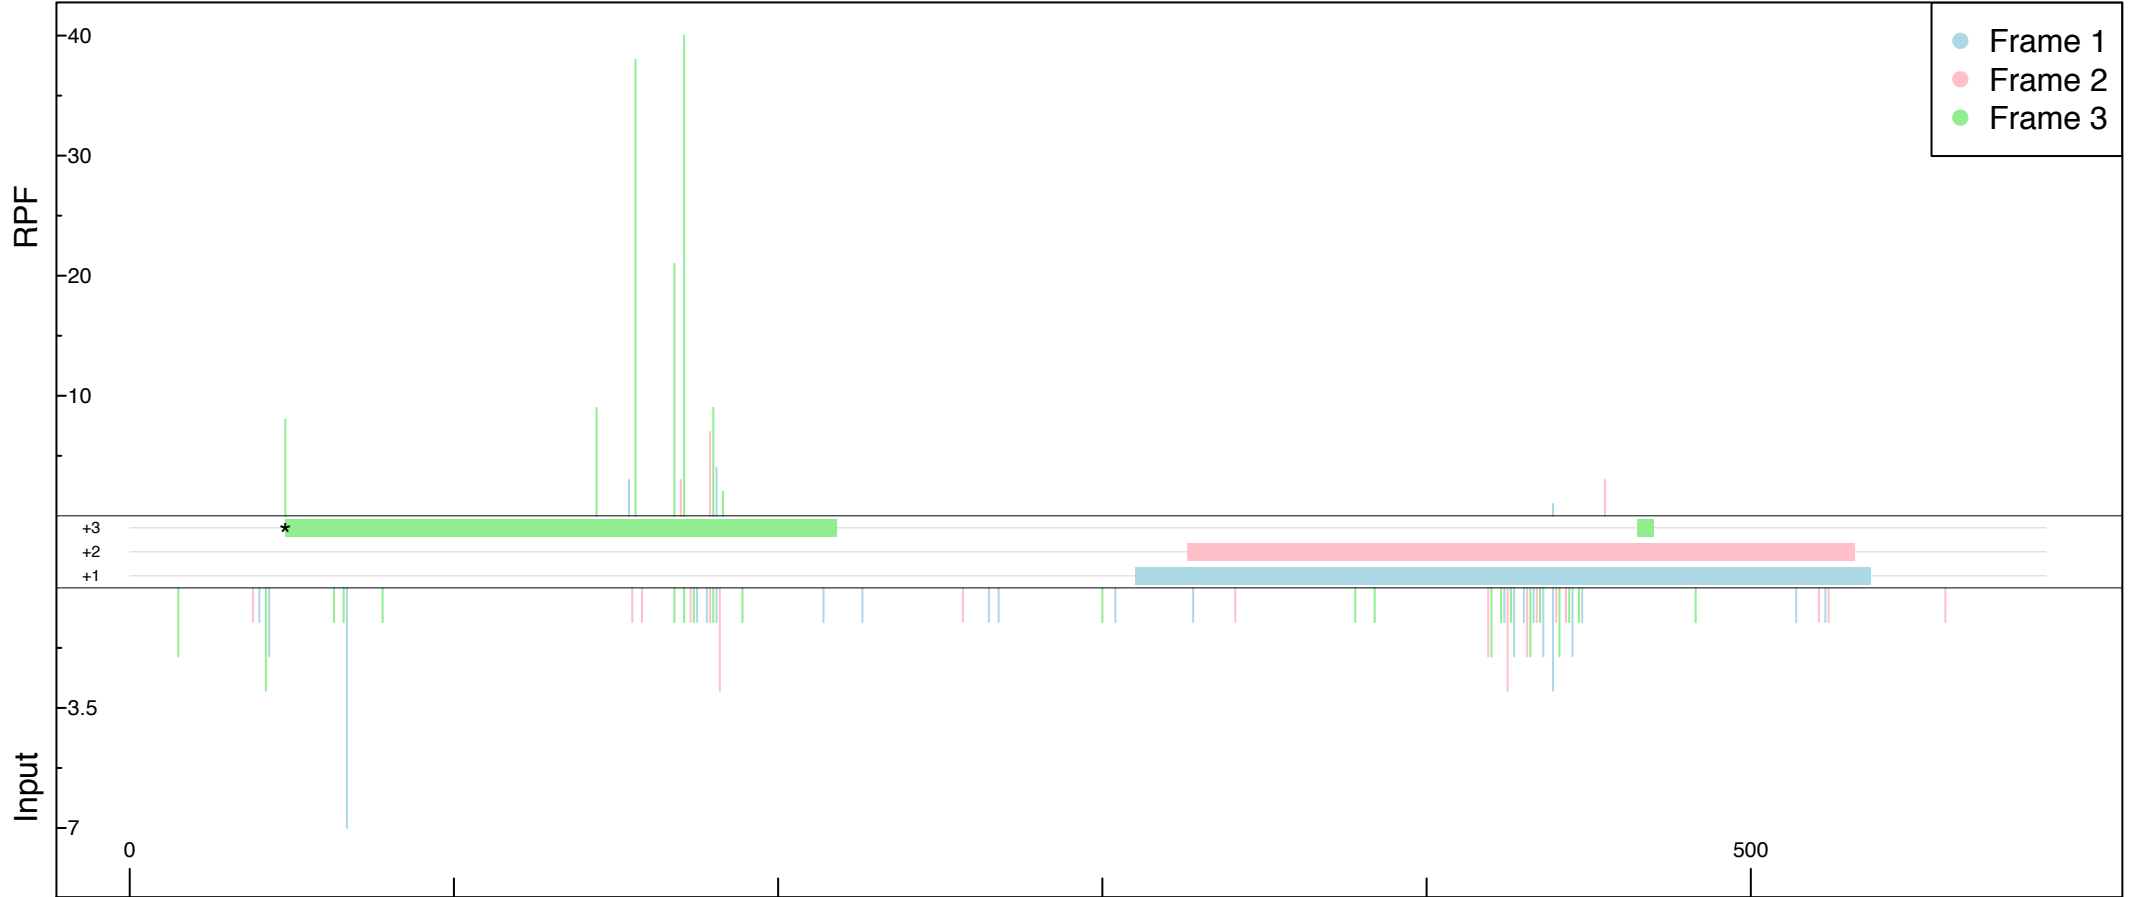

\*MKGAIHRAGGNADFGSSSTHSTTLFFLVRLHLRIRKKPATRETAEGSLKDIFIWIC

Zv9\_00030320, Global

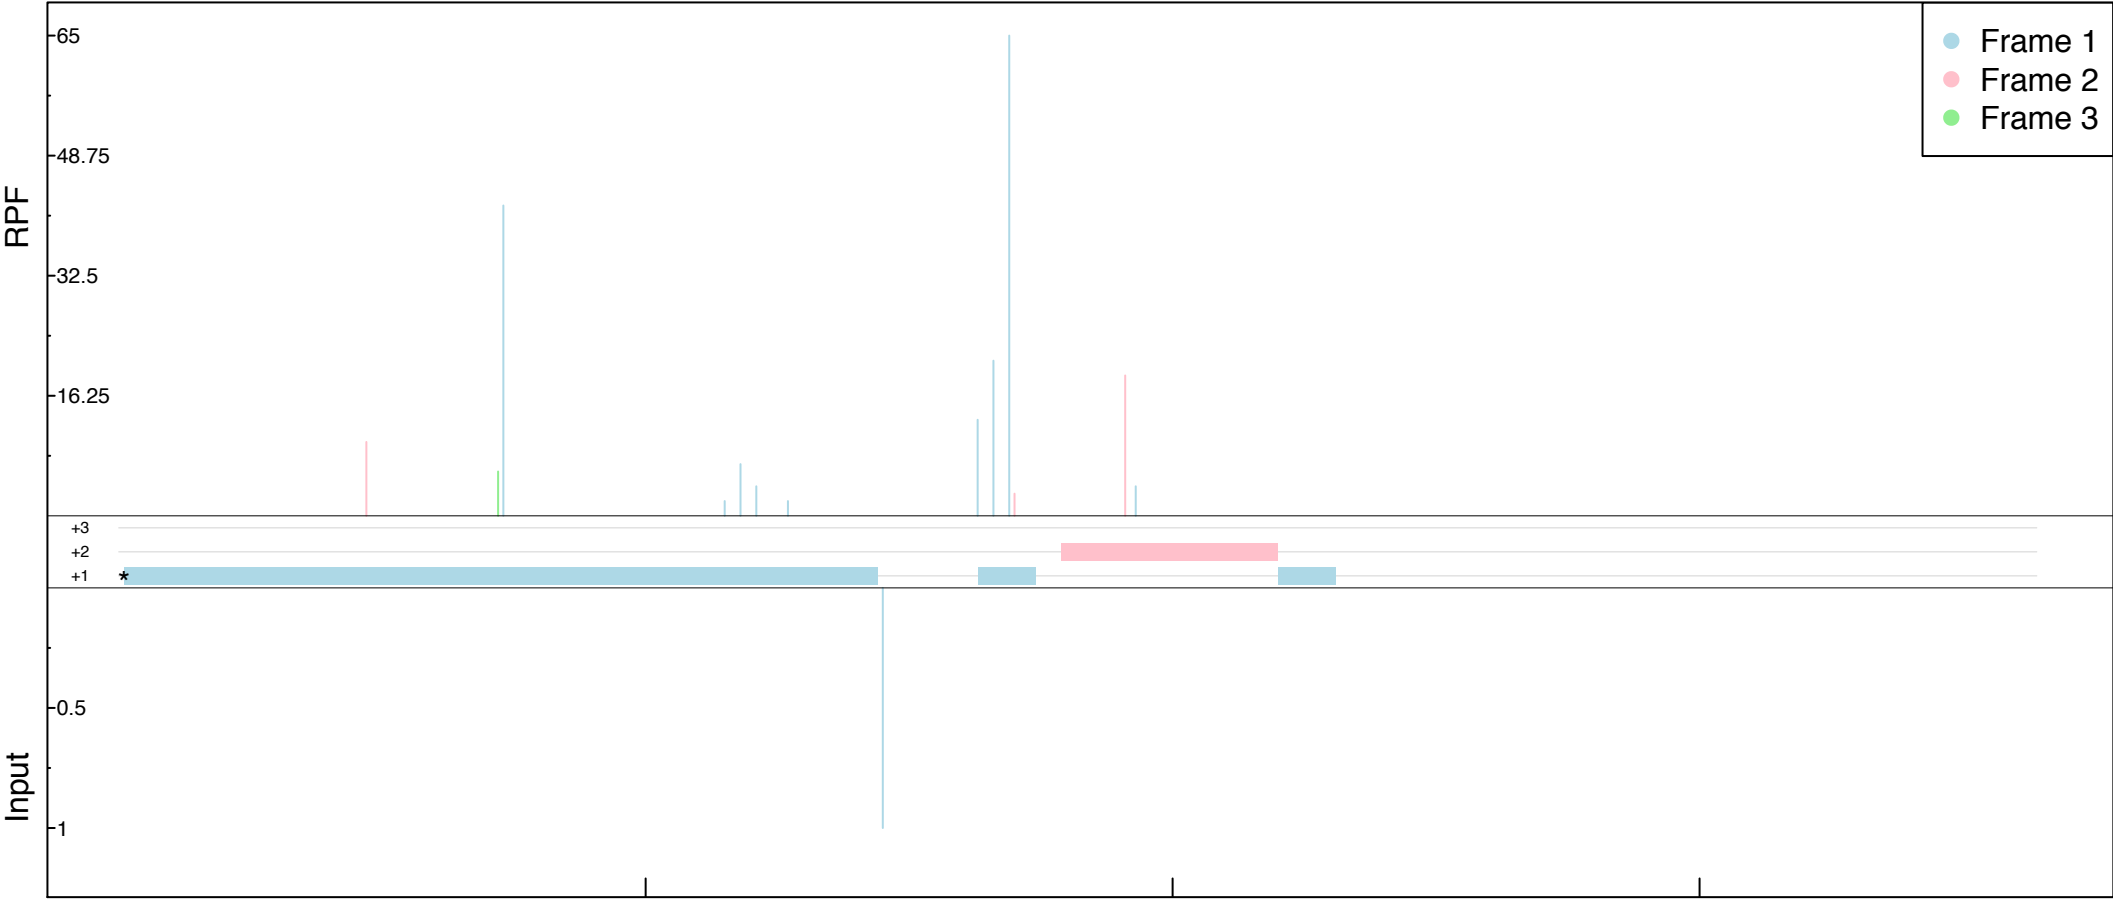

\*MCCCVLLKTVILPTVIVYLRSFYKMNLAKNKLLCCESTVFTSYFIGI

# ENSDART00000151349, Global

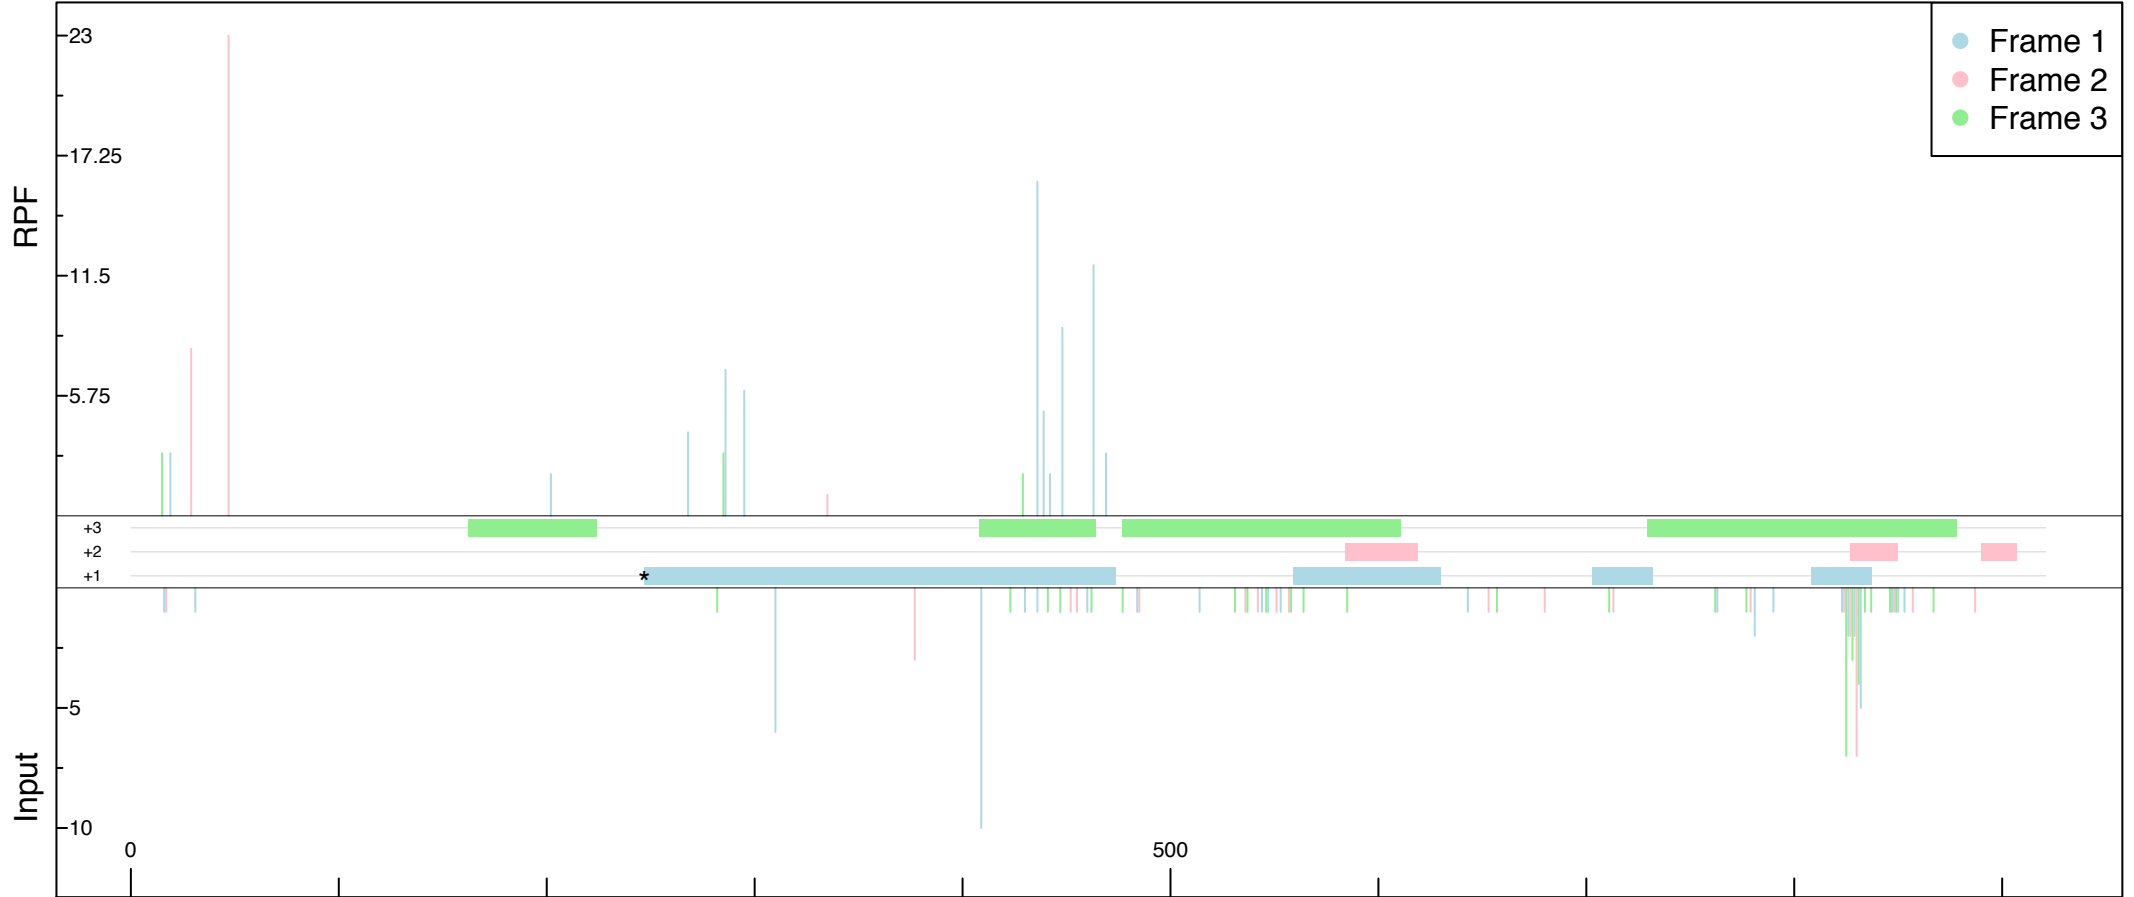

\*MASNHSTNMAALDQRQRDTGNLPSQGEVSSSSVQTEPGTTDPQDRLDPHPDLQCCQMGRKVVDDMRFMISCTNWY

ENSDART00000151505, Global

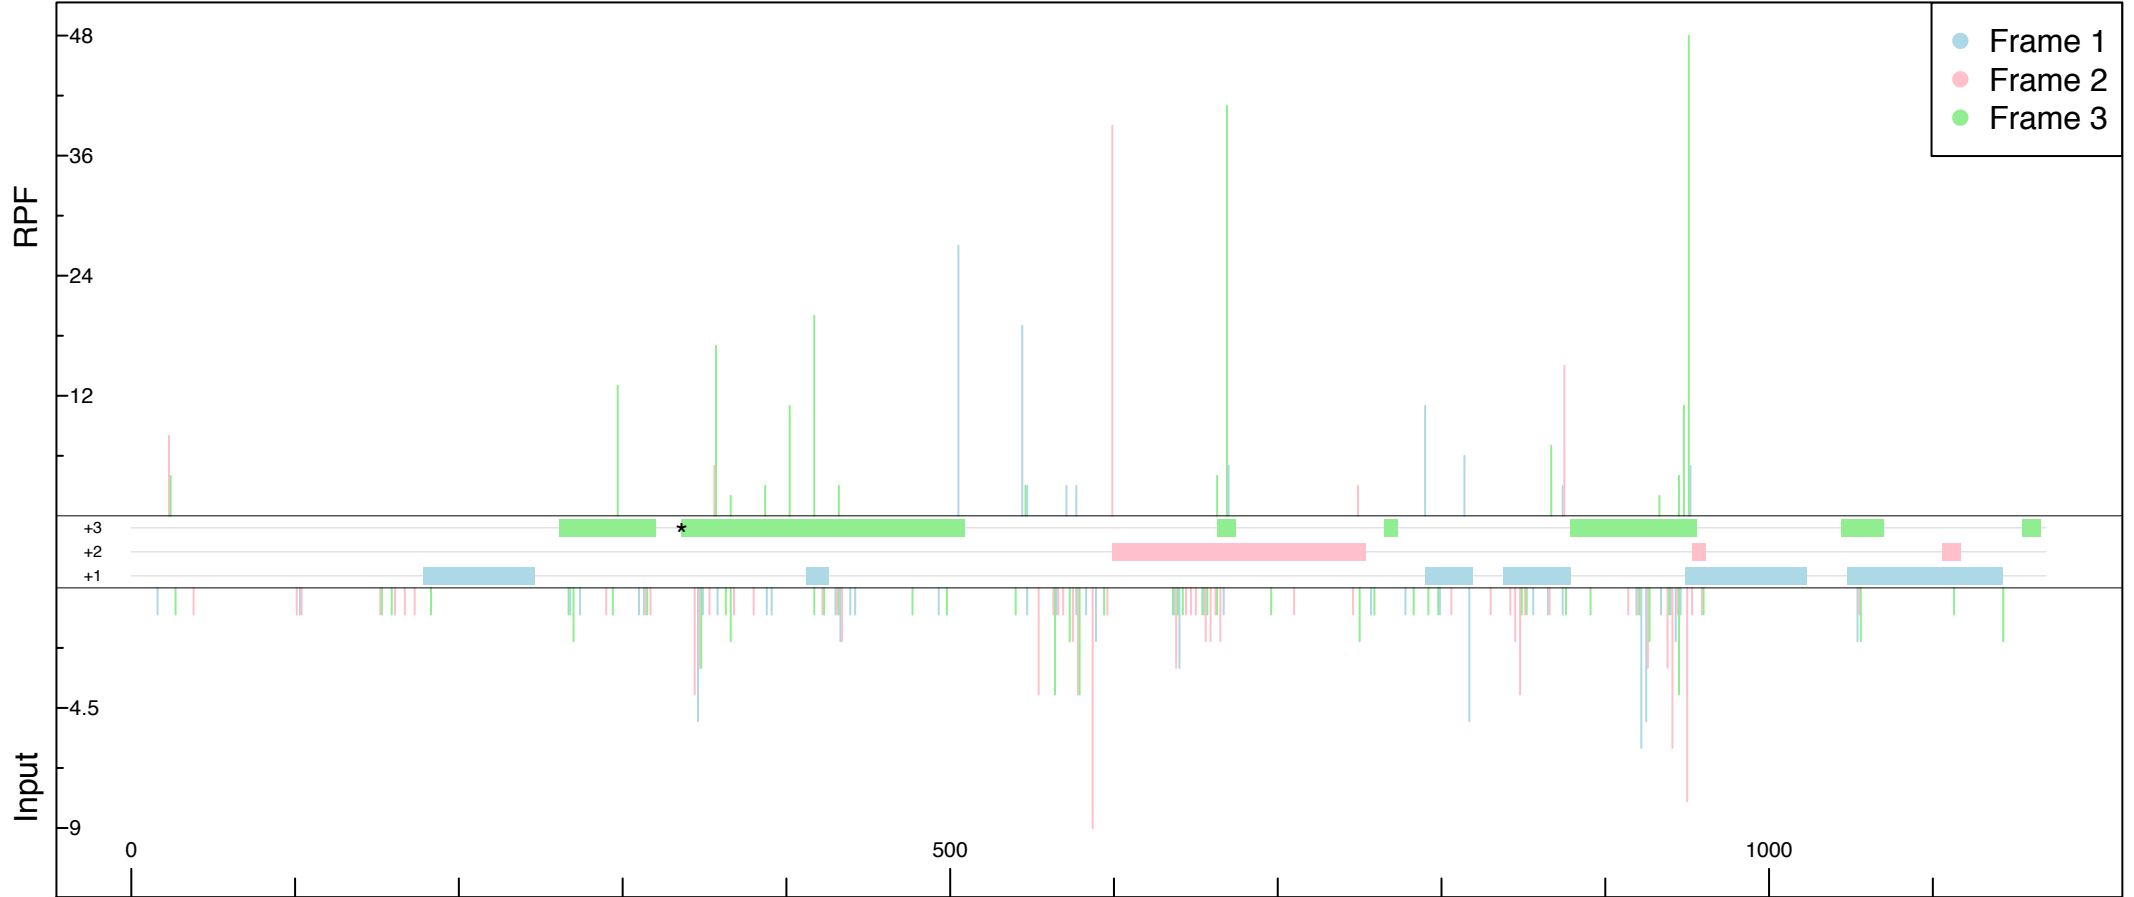

\*MLAIPRFIAIPRFTAVFHKMQKLLTYEFILTKELFTALHLNSHNLTELHNCPTQDQC

# ENSDART00000133113, Global

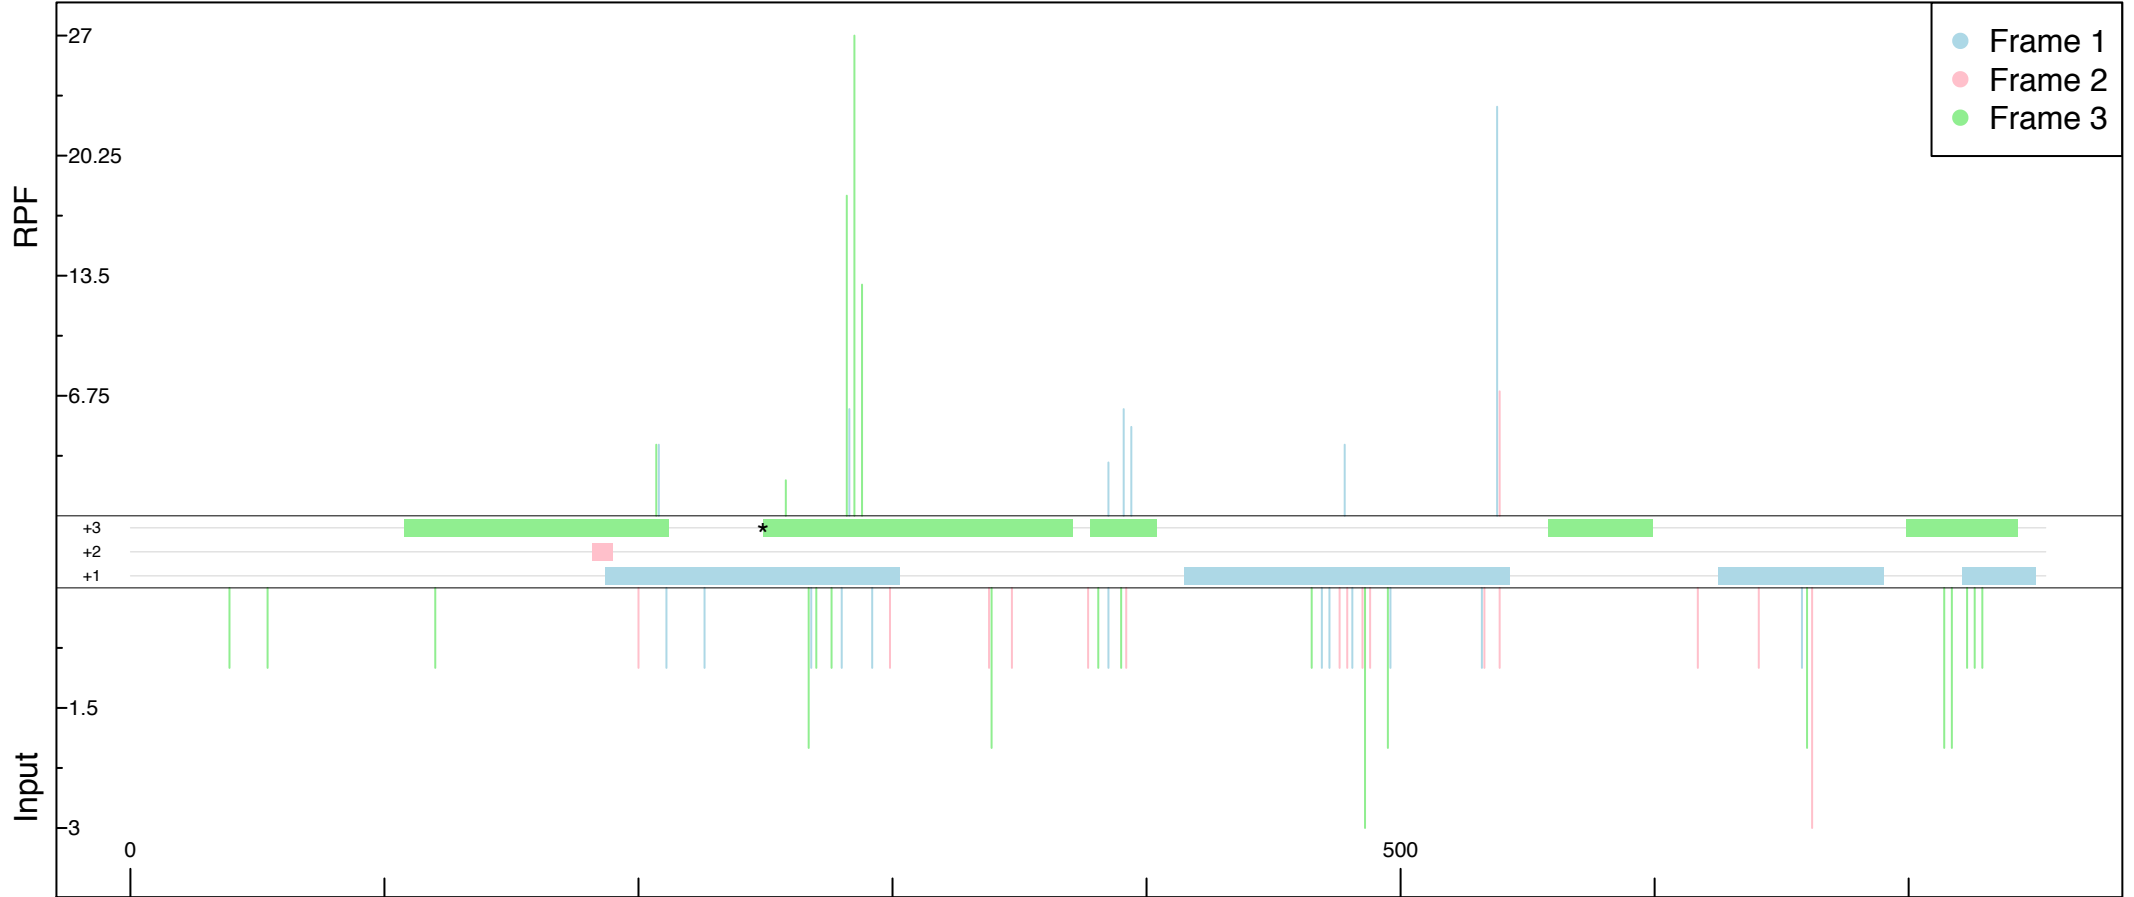

\*MQLEGCTRLWETDDDPELKAFSLLASRSTVLHFGSQSNLN
